# Supplementary material for: DEP domain containing 1: a potential oncogenic driver
Source: Biol Res. 2025 Oct 8;58:64. doi: 10.1186/s40659-025-00643-0 (PMC12505635; doi:10.1186/s40659-025-00643-0)
Supplement: Supplementary file 2 — Supplementary Material 2 [file 40659_2025_643_MOESM2_ESM.xlsx]

## Sheet: 1.ACC
ID	Description	setSize	enrichmentScore	NES	pvalue	p.adjust	qvalue	rank	leading_edge	core_enrichment
REACTOME_CELL_CYCLE_CHECKPOINTS	REACTOME_CELL_CYCLE_CHECKPOINTS	290	0.686823	2.71263	1e-10	8.13548e-09	6.04075e-09	3703	tags=36%, list=11%, signal=33%	CDC20/CCNB2/KIF2C/SFN/BIRC5/CENPA/AURKB/CDC45/UBE2C/SKA1/MCM10/NUF2/EXO1/CDCA8/SPC24/PLK1/CENPF/CLSPN/SPC25/SGO1/CDK1/PKMYT1/CCNA2/CENPM/ERCC6L/GTSE1/ORC1/BUB1B/KNL1/BUB1/CENPI/NDC80/CDC25C/CHEK1/ZWINT/SGO2/KIF18A/CDC25A/BLM/CCNB1/CENPU/CENPK/RMI2/H2BC14/CDC6/H2BC7/BRCA1/CDC7/CENPE/H2BC17/H2BC8/PSMA8/H4C5/H2BC4/UBE2S/MCM5/MCM6/DNA2/CCNE2/CENPN/ORC6/BRIP1/CDKN2A/MCM7/H2BC11/CCNE1/MCM2/H2AX/CENPH/H…
WP_RETINOBLASTOMA_GENE_IN_CANCER	WP_RETINOBLASTOMA_GENE_IN_CANCER	87	0.778316	2.67309	1e-10	8.13548e-09	6.04075e-09	4494	tags=57%, list=13%, signal=50%	RRM2/CCNB2/CDC45/TOP2A/E2F2/CDK1/KIF4A/CCNA2/ORC1/ANLN/CDT1/CHEK1/CDC25A/CCNB1/TYMS/STMN1/CDC7/POLE2/FANCG/MCM6/TTK/CCNE2/PLK4/E2F1/MCM7/DHFR/CCNE1/HMGB2/MCM4/PRIM1/MCM3/BARD1/CDK2/DNMT1/CDC25B/RFC4/RFC3/WEE1/MYC/SMC2/RFC5/RRM1/POLD3/H2AZ1/PCNA/SKP2/POLE/SUV39H1/RABIF/MSH6
REACTOME_RESOLUTION_OF_SISTER_CHROMATID_COHESION	REACTOME_RESOLUTION_OF_SISTER_CHROMATID_COHESION	126	0.726677	2.62405	1e-10	8.13548e-09	6.04075e-09	4774	tags=46%, list=14%, signal=40%	CDC20/CCNB2/KIF2C/BIRC5/CENPA/AURKB/SKA1/NUF2/CDCA8/SPC24/PLK1/CDCA5/CENPF/SPC25/SGO1/CDK1/CENPM/ERCC6L/BUB1B/KNL1/BUB1/CENPI/NDC80/ZWINT/SGO2/KIF18A/TUBA3C/CCNB1/CENPU/CENPK/CENPE/TUBB2B/CENPN/TUBB6/CENPH/CENPL/MAD2L1/CENPO/ZWILCH/TUBB2A/KNTC1/SPDL1/CENPP/TUBB3/TUBB4B/NDE1/DSN1/CENPQ/BUB3/RCC2/SKA2/CENPT/TUBA1B/NUP107/PPP2R1A/INCENP/TUBB1/NUP85
REACTOME_MITOTIC_PROMETAPHASE	REACTOME_MITOTIC_PROMETAPHASE	203	0.676437	2.59214	1e-10	8.13548e-09	6.04075e-09	4774	tags=38%, list=14%, signal=33%	CDC20/CCNB2/KIF2C/BIRC5/CENPA/AURKB/SKA1/NUF2/NEK2/CDCA8/SPC24/PLK1/CDCA5/CENPF/NCAPH/SPC25/SGO1/CDK1/NCAPG/CENPM/ERCC6L/BUB1B/KNL1/BUB1/CENPI/NDC80/ZWINT/SGO2/KIF18A/TUBA3C/CCNB1/CENPU/CENPK/CENPE/TUBB2B/NEK6/CENPN/TUBB6/PLK4/HAUS8/CENPH/CENPL/MAD2L1/CENPO/ZWILCH/NCAPD2/TUBB2A/KNTC1/SPDL1/CENPP/TUBB3/TUBB4B/CEP152/TUBB/CEP72/SMC2/NDE1/ODF2/DSN1/CENPQ/BUB3/RCC2/SKA2/SMC4/CENPJ/HAUS7/HAUS1/CEP164/…
REACTOME_MITOTIC_SPINDLE_CHECKPOINT	REACTOME_MITOTIC_SPINDLE_CHECKPOINT	111	0.723648	2.5835	1e-10	8.13548e-09	6.04075e-09	3703	tags=39%, list=11%, signal=35%	CDC20/KIF2C/BIRC5/CENPA/AURKB/UBE2C/SKA1/NUF2/CDCA8/SPC24/PLK1/CENPF/SPC25/SGO1/CENPM/ERCC6L/BUB1B/KNL1/BUB1/CENPI/NDC80/ZWINT/SGO2/KIF18A/CENPU/CENPK/CENPE/UBE2S/CENPN/CENPH/CENPL/MAD2L1/CENPO/ZWILCH/KNTC1/SPDL1/CENPP/NDE1/DSN1/CENPQ/BUB3/RCC2/SKA2
KEGG_CELL_CYCLE	KEGG_CELL_CYCLE	125	0.70181	2.53371	1e-10	8.13548e-09	6.04075e-09	3661	tags=37%, list=11%, signal=33%	CDC20/CCNB2/SFN/CDC45/PLK1/E2F2/SMC1B/CDK1/PKMYT1/CCNA2/ORC1/BUB1B/BUB1/PTTG1/CDC25C/CHEK1/ESPL1/CDC25A/CCNB1/CDC6/CDC7/MCM5/MCM6/TTK/CCNE2/ORC6/CDKN2A/E2F1/MCM7/CCNE1/MCM2/MAD2L1/MCM4/MCM3/CDK2/CDC25B/WEE1/TGFB3/MAD2L2/RBL1/CHEK2/MYC/DBF4/CDKN2D/BUB3/CCNA1
WP_CELL_CYCLE	WP_CELL_CYCLE	120	0.704801	2.52375	1e-10	8.13548e-09	6.04075e-09	3661	tags=37%, list=11%, signal=33%	CDC20/CCNB2/SFN/CDC45/PLK1/E2F2/SMC1B/CDK1/PKMYT1/CCNA2/ORC1/BUB1/PTTG1/CDC25C/CHEK1/ESPL1/CDC25A/CCNB1/CDC6/CDC7/MCM5/MCM6/TTK/CCNE2/ORC6/CDKN2A/E2F1/MCM7/CCNE1/MCM2/MCM4/MCM3/CDK2/CDC25B/WEE1/TGFB3/MAD2L2/RBL1/CHEK2/MYC/DBF4/CDKN2D/BUB3/CCNA1
REACTOME_RHO_GTPASES_ACTIVATE_FORMINS	REACTOME_RHO_GTPASES_ACTIVATE_FORMINS	140	0.684819	2.51929	1e-10	8.13548e-09	6.04075e-09	4774	tags=39%, list=14%, signal=34%	CDC20/KIF2C/BIRC5/CENPA/AURKB/SKA1/NUF2/CDCA8/SPC24/PLK1/CENPF/SPC25/SGO1/CENPM/ERCC6L/BUB1B/KNL1/BUB1/CENPI/NDC80/DIAPH3/ZWINT/SGO2/KIF18A/TUBA3C/CENPU/CENPK/CENPE/TUBB2B/CENPN/TUBB6/CENPH/CENPL/MAD2L1/CENPO/ZWILCH/TUBB2A/KNTC1/SPDL1/CENPP/TUBB3/TUBB4B/NDE1/DSN1/CENPQ/BUB3/RCC2/SKA2/CENPT/TUBA1B/NUP107/PPP2R1A/INCENP/TUBB1/NUP85
REACTOME_DNA_REPLICATION	REACTOME_DNA_REPLICATION	187	0.659141	2.50909	1e-10	8.13548e-09	6.04075e-09	6119	tags=49%, list=18%, signal=40%	H3C2/CDC45/UBE2C/MCM10/CCNA2/H2AC14/ORC1/CDT1/H3C3/H2AC4/GINS2/H2BC14/GINS1/CDC6/H2BC7/GINS4/CDC7/POLE2/H2BC17/H2BC8/PSMA8/H4C5/H2BC4/UBE2S/MCM5/MCM6/H3C11/DNA2/CCNE2/ORC6/FEN1/H3C7/GMNN/MCM7/H3C12/H2BC11/CCNE1/MCM2/H2AX/POLD1/H2BC10/H2BC12/LIG1/H4C9/MCM4/PRIM1/H3C8/MCM3/H4C1/CDK2/H2BC9/H4C4/RFC4/RFC3/RFC2/H2BC6/PSME4/H3C14/H2AC8/RFC5/POLA2/H4C8/RPS27A/POLD3/H2BC13/DBF4/H2AZ1/H3C1/PRIM2/CCNA1/MCM…
REACTOME_M_PHASE	REACTOME_M_PHASE	416	0.615317	2.50892	1e-10	8.13548e-09	6.04075e-09	6623	tags=40%, list=19%, signal=32%	CDC20/H3C2/CCNB2/KIF2C/BIRC5/CENPA/AURKB/UBE2C/SKA1/NUF2/NEK2/CDCA8/SPC24/PLK1/KIF20A/CDCA5/CENPF/NCAPH/SPC25/SGO1/CDK1/NCAPG/H2AC14/CENPM/ERCC6L/BUB1B/KNL1/BUB1/CENPI/NDC80/KIF23/PTTG1/H3C3/ZWINT/SGO2/ESPL1/KIF18A/TUBA3C/H2AC4/CCNB1/CENPU/CENPK/LMNB1/H2BC14/H2BC7/CENPE/H2BC17/H2BC8/TUBB2B/NEK6/PSMA8/H4C5/H2BC4/UBE2S/H3C11/CENPN/TUBB6/H3C7/PLK4/HAUS8/H3C12/H2BC11/H2AX/CENPH/FBXO5/H2BC10/CENPL/H2B…
PID_PLK1_PATHWAY	PID_PLK1_PATHWAY	46	0.812187	2.48612	1e-10	8.13548e-09	6.04075e-09	3327	tags=54%, list=10%, signal=49%	CDC20/SPC24/PLK1/KIF20A/CLSPN/SGO1/CDK1/ERCC6L/BUB1B/BUB1/NDC80/CDC25C/TPX2/CCNB1/CENPU/AURKA/CENPE/ECT2/FBXO5/CDC25B/WEE1/PRC1/BORA/ODF2/SSPOP
REACTOME_CHROMOSOME_MAINTENANCE	REACTOME_CHROMOSOME_MAINTENANCE	139	0.675533	2.4817	1e-10	8.13548e-09	6.04075e-09	4953	tags=47%, list=14%, signal=40%	TERT/HJURP/CENPA/PIF1/CCNA2/H2AC14/CENPM/KNL1/CENPI/H2AC4/BLM/CENPU/CENPK/H2BC14/H2BC7/CENPW/H2BC17/H2BC8/H4C5/H2BC4/DNA2/CENPN/FEN1/H2BC11/DSCC1/H2AX/CHTF18/POLD1/CENPH/H2BC10/CENPL/H2BC12/LIG1/H4C9/CENPO/PRIM1/H4C1/CDK2/H2BC9/H4C4/RFC4/RFC3/RFC2/H2BC6/CENPP/H2AC8/RFC5/POLA2/H4C8/POLD3/CENPQ/H2BC13/H2AZ1/PRIM2/CCNA1/MIS18BP1/CENPT/PCNA/RUVBL2/CENPX/H4C3/OIP5/H2AC6/MIS18A/RPA2
REACTOME_G2_M_CHECKPOINTS	REACTOME_G2_M_CHECKPOINTS	166	0.659386	2.47483	1e-10	8.13548e-09	6.04075e-09	6119	tags=46%, list=18%, signal=38%	CCNB2/SFN/CDC45/MCM10/EXO1/CLSPN/CDK1/PKMYT1/GTSE1/ORC1/CDC25C/CHEK1/CDC25A/BLM/CCNB1/RMI2/H2BC14/CDC6/H2BC7/BRCA1/CDC7/H2BC17/H2BC8/PSMA8/H4C5/H2BC4/MCM5/MCM6/DNA2/ORC6/BRIP1/MCM7/H2BC11/MCM2/H2AX/H2BC10/H2BC12/H4C9/MCM4/MCM3/BARD1/H4C1/CDK2/H2BC9/H4C4/RFC4/RFC3/RFC2/H2BC6/WEE1/PSME4/CHEK2/RFC5/H4C8/RPS27A/H2BC13/DBF4/MCM8/NSD2/RAD9B/H4C3/RAD1/YWHAQ/RPA2/PSMB7/RAD9A/PSMB5/H3-4/TOPBP1/PSMD14/H2BC…
REACTOME_SEPARATION_OF_SISTER_CHROMATIDS	REACTOME_SEPARATION_OF_SISTER_CHROMATIDS	191	0.643387	2.46397	1e-10	8.13548e-09	6.04075e-09	3703	tags=29%, list=11%, signal=26%	CDC20/KIF2C/BIRC5/CENPA/AURKB/UBE2C/SKA1/NUF2/CDCA8/SPC24/PLK1/CDCA5/CENPF/SPC25/SGO1/CENPM/ERCC6L/BUB1B/KNL1/BUB1/CENPI/NDC80/PTTG1/ZWINT/SGO2/ESPL1/KIF18A/TUBA3C/CENPU/CENPK/CENPE/TUBB2B/PSMA8/UBE2S/CENPN/TUBB6/CENPH/CENPL/MAD2L1/CENPO/ZWILCH/TUBB2A/KNTC1/SPDL1/CENPP/PSME4/TUBB3/TUBB4B/NDE1/RPS27A/DSN1/CENPQ/BUB3/RCC2/SKA2
REACTOME_MITOTIC_METAPHASE_AND_ANAPHASE	REACTOME_MITOTIC_METAPHASE_AND_ANAPHASE	236	0.633798	2.46145	1e-10	8.13548e-09	6.04075e-09	4624	tags=31%, list=13%, signal=27%	CDC20/CCNB2/KIF2C/BIRC5/CENPA/AURKB/UBE2C/SKA1/NUF2/CDCA8/SPC24/PLK1/CDCA5/CENPF/SPC25/SGO1/CDK1/CENPM/ERCC6L/BUB1B/KNL1/BUB1/CENPI/NDC80/PTTG1/ZWINT/SGO2/ESPL1/KIF18A/TUBA3C/CCNB1/CENPU/CENPK/LMNB1/CENPE/TUBB2B/PSMA8/UBE2S/CENPN/TUBB6/CENPH/FBXO5/CENPL/MAD2L1/CENPO/ZWILCH/TUBB2A/KNTC1/SPDL1/CENPP/VRK1/PSME4/TUBB3/RCC1/RAN/TUBB4B/NUP188/LBR/NDE1/RPS27A/DSN1/CENPQ/NDC1/BUB3/RCC2/SKA2/CENPT/TMPO/TU…
REACTOME_MITOTIC_G1_PHASE_AND_G1_S_TRANSITION	REACTOME_MITOTIC_G1_PHASE_AND_G1_S_TRANSITION	149	0.663839	2.45482	1e-10	8.13548e-09	6.04075e-09	6713	tags=46%, list=19%, signal=37%	MYBL2/RRM2/CDC45/MCM10/TK1/TOP2A/E2F2/CDK1/CCNA2/ORC1/CDT1/CDC25A/CCNB1/TYMS/CDC6/CDC7/POLE2/MCM5/MCM6/CCNE2/ORC6/CDKN2A/GMNN/E2F1/MCM7/DHFR/CKS1B/CCNE1/MCM2/FBXO5/MCM4/PRIM1/MCM3/CDK2/LIN9/WEE1/RBL1/MYC/POLA2/RPS27A/DBF4/CDKN2D/PRIM2/CCNA1/MCM8/RPA4/PCNA/PTK6/SKP2/POLE/CDKN2C/POLE4/PPP2R1A/RPA2/POLE3/TFDP1/PSMB7/PSMB5/PSMD14/RPA3/PSMD1/UBA52/PPP2R1B/PSMB9/E2F3/POLA1/PSMA4/CDK4
REACTOME_ACTIVATION_OF_ATR_IN_RESPONSE_TO_REPLICATION_STRESS	REACTOME_ACTIVATION_OF_ATR_IN_RESPONSE_TO_REPLICATION_STRESS	37	0.821195	2.40607	1e-10	8.13548e-09	6.04075e-09	5259	tags=73%, list=15%, signal=62%	CDC45/MCM10/CLSPN/ORC1/CDC25C/CHEK1/CDC25A/CDC6/CDC7/MCM5/MCM6/ORC6/MCM7/MCM2/MCM4/MCM3/CDK2/RFC4/RFC3/RFC2/RFC5/DBF4/MCM8/RAD9B/RAD1/RPA2/RAD9A
REACTOME_DNA_REPLICATION_PRE_INITIATION	REACTOME_DNA_REPLICATION_PRE_INITIATION	159	0.642414	2.39943	1e-10	8.13548e-09	6.04075e-09	6703	tags=48%, list=19%, signal=39%	H3C2/CDC45/UBE2C/MCM10/H2AC14/ORC1/CDT1/H3C3/H2AC4/H2BC14/CDC6/H2BC7/CDC7/POLE2/H2BC17/H2BC8/H4C5/H2BC4/UBE2S/MCM5/MCM6/H3C11/ORC6/H3C7/GMNN/MCM7/H3C12/H2BC11/MCM2/H2AX/H2BC10/H2BC12/H4C9/MCM4/PRIM1/H3C8/MCM3/H4C1/CDK2/H2BC9/H4C4/H2BC6/H3C14/H2AC8/POLA2/H4C8/RPS27A/H2BC13/DBF4/H2AZ1/H3C1/PRIM2/MCM8/RPA4/POLE/POLE4/H4C3/H3C10/H2AC6/RPA2/POLE3/PSMB7/H3C4/PSMB5/KPNB1/PSMD14/H2BC15/H2BC5/RPA3/PSMD1/U…
REACTOME_HOMOLOGY_DIRECTED_REPAIR	REACTOME_HOMOLOGY_DIRECTED_REPAIR	137	0.643596	2.3611	1e-10	8.13548e-09	6.04075e-09	6119	tags=47%, list=18%, signal=39%	EXO1/CLSPN/RAD51/CCNA2/EME1/CHEK1/POLQ/BRCA2/RAD51AP1/BLM/RMI2/H2BC14/H2BC7/BRCA1/POLE2/H2BC17/H2BC8/H4C5/XRCC2/H2BC4/DNA2/BRIP1/FEN1/H2BC11/TIMELESS/H2AX/POLD1/H2BC10/H2BC12/H4C9/BARD1/H4C1/CDK2/H2BC9/H4C4/RFC4/RFC3/RFC2/H2BC6/XRCC3/GEN1/RFC5/H4C8/RPS27A/POLD3/H2BC13/CCNA1/PCNA/NSD2/POLE/POLE4/RAD9B/H4C3/RAD1/PARP2/RPA2/POLE3/RAD9A/H3-4/TOPBP1/H2BC15/H2BC5/RPA3/UBA52
REACTOME_DNA_DOUBLE_STRAND_BREAK_REPAIR	REACTOME_DNA_DOUBLE_STRAND_BREAK_REPAIR	167	0.626186	2.35962	1e-10	8.13548e-09	6.04075e-09	7538	tags=51%, list=22%, signal=40%	EXO1/CLSPN/RAD51/CCNA2/EME1/CHEK1/POLQ/BRCA2/RAD51AP1/BLM/RMI2/H2BC14/H2BC7/BRCA1/POLE2/H2BC17/H2BC8/EYA2/H4C5/XRCC2/H2BC4/DNA2/KPNA2/BRIP1/FEN1/EYA1/H2BC11/TIMELESS/H2AX/POLD1/H2BC10/H2BC12/H4C9/BARD1/H4C1/CDK2/H2BC9/H4C4/RFC4/RFC3/RFC2/H2BC6/CHEK2/XRCC3/GEN1/RFC5/H4C8/RPS27A/POLD3/H2BC13/CCNA1/PCNA/NSD2/POLE/POLE4/RAD9B/H4C3/RAD1/DCLRE1C/PARP2/TDP1/RPA2/POLE3/RAD9A/KDM4B/H3-4/TOPBP1/H2BC15/H2BC…
REACTOME_RHO_GTPASE_EFFECTORS	REACTOME_RHO_GTPASE_EFFECTORS	323	0.585447	2.34056	1e-10	8.13548e-09	6.04075e-09	3737	tags=28%, list=11%, signal=25%	CDC20/H3C2/KIF2C/SFN/BIRC5/CENPA/AURKB/SKA1/NUF2/KIF14/CDCA8/SPC24/PLK1/CENPF/SPC25/SGO1/IQGAP3/H2AC14/CENPM/ERCC6L/BUB1B/KNL1/BUB1/CENPI/NDC80/H3C3/CDC25C/DIAPH3/ZWINT/SGO2/KIF18A/TUBA3C/H2AC4/CENPU/CENPK/H2BC14/H2BC7/CENPE/H2BC17/H2BC8/TUBB2B/H4C5/H2BC4/H3C11/CENPN/TUBB6/H3C7/S100A9/H3C12/H2BC11/H2AX/CENPH/H2BC10/CENPL/H2BC12/MAD2L1/CIT/H4C9/CENPO/ZWILCH/MAPK11/H3C8/H4C1/H2BC9/TUBB2A/KNTC1/H4C4…
REACTOME_S_PHASE	REACTOME_S_PHASE	163	0.623883	2.33994	1e-10	8.13548e-09	6.04075e-09	8037	tags=48%, list=23%, signal=37%	CDC45/UBE2C/ESCO2/CDCA5/CCNA2/ORC1/CDT1/CDC25A/GINS2/GINS1/CDC6/GINS4/POLE2/PSMA8/UBE2S/MCM5/MCM6/DNA2/CCNE2/ORC6/FEN1/GMNN/E2F1/MCM7/CKS1B/CCNE1/MCM2/POLD1/LIG1/MCM4/PRIM1/MCM3/CDK2/CDC25B/RFC4/LIN9/RFC3/RFC2/WEE1/PSME4/MYC/RFC5/POLA2/RPS27A/POLD3/PRIM2/CCNA1/MCM8/PCNA/PTK6/SKP2/POLE/POLE4/RPA2/POLE3/TFDP1/PSMB7/PSMB5/PSMD14/RPA3/PSMD1/UBA52/PDS5B/PSMB9/POLA1/PSMA4/CDK4/CDC26/PSMA5/POLD2/PSMC1/P…
REACTOME_G2_M_DNA_DAMAGE_CHECKPOINT	REACTOME_G2_M_DNA_DAMAGE_CHECKPOINT	93	0.669042	2.33	1e-10	8.13548e-09	6.04075e-09	6054	tags=52%, list=18%, signal=43%	SFN/EXO1/CDK1/CDC25C/CHEK1/BLM/CCNB1/RMI2/H2BC14/H2BC7/BRCA1/H2BC17/H2BC8/H4C5/H2BC4/DNA2/BRIP1/H2BC11/H2AX/H2BC10/H2BC12/H4C9/BARD1/H4C1/H2BC9/H4C4/RFC4/RFC3/RFC2/H2BC6/WEE1/CHEK2/RFC5/H4C8/H2BC13/NSD2/RAD9B/H4C3/RAD1/YWHAQ/RPA2/RAD9A/H3-4/TOPBP1/H2BC15/H2BC5/RPA3/YWHAH
REACTOME_SYNTHESIS_OF_DNA	REACTOME_SYNTHESIS_OF_DNA	121	0.640058	2.29464	1e-10	8.13548e-09	6.04075e-09	8037	tags=52%, list=23%, signal=40%	CDC45/UBE2C/CCNA2/ORC1/CDT1/GINS2/GINS1/CDC6/GINS4/POLE2/PSMA8/UBE2S/MCM5/MCM6/DNA2/CCNE2/ORC6/FEN1/GMNN/MCM7/CCNE1/MCM2/POLD1/LIG1/MCM4/PRIM1/MCM3/CDK2/RFC4/RFC3/RFC2/PSME4/RFC5/POLA2/RPS27A/POLD3/PRIM2/CCNA1/MCM8/PCNA/SKP2/POLE/POLE4/RPA2/POLE3/PSMB7/PSMB5/PSMD14/RPA3/PSMD1/UBA52/PSMB9/POLA1/PSMA4/CDC26/PSMA5/POLD2/PSMC1/PSMC3/PSMD11/PSMA6/PSMB2/PSMA1
REACTOME_BIOLOGICAL_OXIDATIONS	REACTOME_BIOLOGICAL_OXIDATIONS	217	-0.550773	-2.28899	1e-10	8.13548e-09	6.04075e-09	4200	tags=33%, list=12%, signal=29%	GSTK1/CYP4F8/MGST2/GSTM5/NAT1/CYP4F2/UGT2B4/CYP27A1/CYP2J2/GLYATL1/UGT2B15/ACSM5/GLYAT/CYP2S1/TBXAS1/ALDH2/SULT1A2/CYP4V2/CYP4A11/ALDH3A1/CYP11B1/ABHD14B/ACSM2A/CYP7A1/SULT1E1/CYP2U1/CYP4F22/ADH7/CYP8B1/CYP2C8/SULT1C2/UGT1A6/CYP2A6/MAOA/CYP2F1/CYP7B1/PTGS1/ACSM2B/CYP3A5/GSTM1/AADAC/DPEP3/MAOB/GSTA2/CYP4A22/UGT2B17/UGT2B11/FMO2/CYP4F12/HPGDS/CYP3A7/ALDH1A1/CYP4B1/ACY3/CYP4F11/ADH6/UGT1A8/UGT1A9/UG…
REACTOME_MITOTIC_PROPHASE	REACTOME_MITOTIC_PROPHASE	142	0.619226	2.27807	1e-10	8.13548e-09	6.04075e-09	6241	tags=42%, list=18%, signal=35%	H3C2/CCNB2/PLK1/CDK1/H2AC14/H3C3/H2AC4/CCNB1/LMNB1/H2BC14/H2BC7/H2BC17/H2BC8/NEK6/H4C5/H2BC4/H3C11/H3C7/H3C12/H2BC11/H2AX/H2BC10/H2BC12/H4C9/MASTL/H3C8/H4C1/NCAPG2/H2BC9/H4C4/H2BC6/VRK1/H3C14/NCAPD3/H2AC8/SMC2/NUP188/H4C8/H2BC13/NDC1/H2AZ1/H3C1/SMC4/TMPO/NUP107/PPP2R1A/NUP62/H4C3/H3C10/NUP85/H2AC6/NCAPH2/KMT5A/H3C4/NUP155/H3-4/H2BC15/H2BC5/SET/PPP2R1B
REACTOME_HCMV_EARLY_EVENTS	REACTOME_HCMV_EARLY_EVENTS	136	0.621476	2.27439	1e-10	8.13548e-09	6.04075e-09	6638	tags=46%, list=19%, signal=37%	H3C2/H2AC14/H2AC12/H3C3/TUBA3C/H2AC4/H2BC14/EZH2/H2BC7/H2BC17/H2BC8/TUBB2B/H4C5/H2BC4/H3C11/TUBB6/H2AC17/H3C7/H3C12/H2BC11/H2BC10/H2AC16/H2BC12/H4C9/H3C8/H4C1/H2BC9/H2AC21/TUBB2A/H4C4/H2BC6/TUBB3/H3C14/H2AC8/TUBB4B/NUP188/H4C8/H2BC13/NDC1/H3C1/TUBA1B/NUP107/NUP62/H4C3/H3C10/TUBB1/H2AC13/NUP85/H2AC6/H3C4/NUP155/TUBA1C/TRIM28/TUBA8/DAXX/H2BC15/H2BC5/H2BC18/H2AC19/TUBA3D/H2AC18/EED
REACTOME_MITOTIC_G2_G2_M_PHASES	REACTOME_MITOTIC_G2_G2_M_PHASES	200	0.592036	2.26302	1e-10	8.13548e-09	6.04075e-09	8037	tags=43%, list=23%, signal=33%	MYBL2/CCNB2/NEK2/PLK1/CENPF/CDK1/PKMYT1/CCNA2/GTSE1/FOXM1/HMMR/CDC25C/TPX2/TUBA3C/CDC25A/CCNB1/AURKA/TUBB2B/PSMA8/TUBB6/PLK4/E2F1/HAUS8/CDK2/CDC25B/TUBB2A/LIN9/WEE1/PSME4/TUBB3/TUBB4B/CEP152/TUBB/CEP72/BORA/NDE1/ODF2/RPS27A/CCNA1/CENPJ/HAUS7/HAUS1/CEP164/PHLDA1/TUBA1B/PPP2R1A/TUBB1/CEP57/MZT1/PSMB7/CNTRL/TUBA1C/PSMB5/TUBA8/DCTN2/PSMD14/PSMD1/UBA52/PPP2R1B/HAUS2/PSMB9/CSNK1E/XPO1/DCTN3/CEP76/TUBA3…
REACTOME_DNA_REPAIR	REACTOME_DNA_REPAIR	332	0.556995	2.22813	1e-10	8.13548e-09	6.04075e-09	8058	tags=41%, list=23%, signal=31%	PCLAF/EXO1/DTL/CLSPN/RAD51/CCNA2/H2AC14/NEIL3/EME1/CHEK1/POLQ/BRCA2/RAD51AP1/UBE2T/H2AC4/BLM/RMI2/H2BC14/H2BC7/BRCA1/POLE2/H2BC17/H2BC8/EYA2/FANCG/H4C5/XRCC2/FANCD2/H2BC4/DNA2/FANCI/KPNA2/BRIP1/FEN1/EYA1/H2BC11/FANCB/ISG15/TIMELESS/H2AX/POLD1/H2BC10/FANCA/H2BC12/LIG1/H4C9/FANCE/FANCC/BARD1/H4C1/CDK2/H2BC9/H4C4/RFC4/RFC3/RFC2/H2BC6/MSH2/H2AC8/MAD2L2/USP1/CHEK2/XRCC3/GEN1/RFC5/H4C8/RPS27A/POLD3/H2B…
REACTOME_CELLULAR_SENESCENCE	REACTOME_CELLULAR_SENESCENCE	195	0.559831	2.13862	1e-10	8.13548e-09	6.04075e-09	3839	tags=28%, list=11%, signal=25%	HMGA2/H3C2/UBE2C/E2F2/CXCL8/CCNA2/H2AC14/H3C3/H1-5/H2AC4/LMNB1/H2BC14/EZH2/H2BC7/H1-4/CBX2/H2BC17/H2BC8/IL6/H4C5/H2BC4/UBE2S/H3C11/CCNE2/CDKN2A/H3C7/E2F1/H3C12/H2BC11/CCNE1/H2AX/H2BC10/H2BC12/H4C9/MAPK11/H3C8/IFNB1/H4C1/CDK2/H2BC9/H4C4/H1-2/H2BC6/H3C14/H2AC8/H1-3/H4C8/RPS27A/H2BC13/CDKN2D/H2AZ1/H3C1/CCNA1/HMGA1
REACTOME_TRANSCRIPTIONAL_REGULATION_BY_TP53	REACTOME_TRANSCRIPTIONAL_REGULATION_BY_TP53	360	0.486695	1.96361	1e-10	8.13548e-09	6.04075e-09	7497	tags=32%, list=22%, signal=25%	TP73/POU4F1/SFN/BIRC5/AURKB/EXO1/E2F7/CDK1/CCNA2/CDC25C/CHEK1/TPX2/BLM/CCNB1/AURKA/RMI2/E2F8/BRCA1/TAF7L/FANCD2/DNA2/FANCI/CCNE2/BRIP1/CDKN2A/ELOA2/E2F1/CCNE1/MAPK11/FANCC/BARD1/CDK2/RFC4/RFC3/NDRG1/RFC2/DDIT4/SMYD2/TP53AIP1/MSH2/RBL1/CHEK2/RFC5/PLK2/RPS27A/PERP/DYRK2/CCNA1/CENPJ/AIFM2/PCNA/STEAP3/TP53I3/RAD9B/PPP2R1A/BTG2/AGO2/TAF5/RAD1/PIP4P1/YWHAQ/MBD3/RPTOR/RPA2/TFDP1/CNOT9/POLR2D/KMT5A/NELFB…
REACTOME_DEPOSITION_OF_NEW_CENPA_CONTAINING_NUCLEOSOMES_AT_THE_CENTROMERE	REACTOME_DEPOSITION_OF_NEW_CENPA_CONTAINING_NUCLEOSOMES_AT_THE_CENTROMERE	72	0.715128	2.40572	1.03726e-10	8.17487e-09	6.06999e-09	4949	tags=58%, list=14%, signal=50%	HJURP/CENPA/H2AC14/CENPM/KNL1/CENPI/H2AC4/CENPU/CENPK/H2BC14/H2BC7/CENPW/H2BC17/H2BC8/H4C5/H2BC4/CENPN/H2BC11/H2AX/CENPH/H2BC10/CENPL/H2BC12/H4C9/CENPO/H4C1/H2BC9/H4C4/H2BC6/CENPP/H2AC8/H4C8/CENPQ/H2BC13/H2AZ1/MIS18BP1/CENPT/CENPX/H4C3/OIP5/H2AC6/MIS18A
KEGG_DRUG_METABOLISM_CYTOCHROME_P450	KEGG_DRUG_METABOLISM_CYTOCHROME_P450	70	-0.703555	-2.48212	1.10243e-10	8.42521e-09	6.25587e-09	4200	tags=53%, list=12%, signal=47%	GSTK1/MGST2/GSTM5/FMO5/UGT2B4/UGT2B15/ALDH3B1/FMO4/ALDH3A1/AOX1/ADH7/CYP2C8/UGT1A6/CYP2A6/MAOA/CYP3A5/GSTM1/MAOB/GSTA2/UGT2B17/UGT2B11/FMO2/CYP3A7/ALDH3B2/ADH6/UGT1A8/UGT1A9/UGT2A3/UGT2B28/FMO3/ADH1A/UGT1A1/ADH4/ADH1B/UGT1A7/CYP3A4/ADH1C
REACTOME_HCMV_INFECTION	REACTOME_HCMV_INFECTION	160	0.585463	2.18486	1.40972e-10	1.04568e-08	7.76434e-09	6638	tags=39%, list=19%, signal=31%	H3C2/H2AC14/H2AC12/H3C3/TUBA3C/H2AC4/H2BC14/EZH2/H2BC7/H2BC17/H2BC8/TUBB2B/H4C5/H2BC4/H3C11/TUBB6/H2AC17/H3C7/H3C12/H2BC11/H2BC10/H2AC16/H2BC12/H4C9/H3C8/H4C1/H2BC9/H2AC21/TUBB2A/H4C4/H2BC6/TUBB3/H3C14/H2AC8/TUBB4B/NUP188/H4C8/H2BC13/NDC1/H3C1/TUBA1B/NUP107/NUP62/H4C3/H3C10/TUBB1/H2AC13/NUP85/H2AC6/H3C4/NUP155/TUBA1C/TRIM28/TUBA8/DAXX/H2BC15/H2BC5/H2BC18/H2AC19/TUBA3D/H2AC18/EED
KEGG_METABOLISM_OF_XENOBIOTICS_BY_CYTOCHROME_P450	KEGG_METABOLISM_OF_XENOBIOTICS_BY_CYTOCHROME_P450	68	-0.688783	-2.42356	1.48993e-10	1.05923e-08	7.86498e-09	3153	tags=56%, list=9%, signal=51%	GSTA5/EPHX1/GSTO2/GSTA1/GSTK1/MGST2/GSTM5/UGT2B4/UGT2B15/ALDH3B1/CYP2S1/ALDH3A1/AKR1C1/ADH7/CYP2C8/UGT1A6/AKR1C2/CYP2F1/CYP3A5/AKR1C3/GSTM1/GSTA2/UGT2B17/UGT2B11/CYP3A7/ALDH3B2/ADH6/UGT1A8/UGT1A9/UGT2A3/UGT2B28/ADH1A/UGT1A1/ADH4/ADH1B/UGT1A7/CYP3A4/ADH1C
WP_DNA_IRDAMAGE_AND_CELLULAR_RESPONSE_VIA_ATR	WP_DNA_IRDAMAGE_AND_CELLULAR_RESPONSE_VIA_ATR	81	0.688374	2.33413	1.51199e-10	1.05923e-08	7.86498e-09	5743	tags=42%, list=17%, signal=35%	CDC45/EXO1/PLK1/CLSPN/CDK1/RAD51/FOXM1/CDC25C/CHEK1/BRCA2/RECQL4/BRCA1/FANCD2/FANCI/BRIP1/FEN1/E2F1/MCM2/H2AX/FANCA/BARD1/CDK2/MSH2/USP1/CHEK2/RFWD3/CEP164/PCNA/RAD1/TDP1/RPA2/RAD9A/TRIM28/TOPBP1
PID_FOXM1_PATHWAY	PID_FOXM1_PATHWAY	40	0.810597	2.41795	1.74448e-10	1.18907e-08	8.82908e-09	3068	tags=50%, list=9%, signal=46%	CCNB2/BIRC5/CENPA/AURKB/NEK2/PLK1/CENPF/CDK1/CCNA2/FOXM1/BRCA2/CCNB1/LAMA4/CDKN2A/CKS1B/CCNE1/CDK2/CDC25B/CHEK2/MYC
REACTOME_TELOMERE_MAINTENANCE	REACTOME_TELOMERE_MAINTENANCE	112	0.641307	2.28821	1.81493e-10	1.20454e-08	8.94392e-09	6721	tags=52%, list=20%, signal=42%	TERT/PIF1/CCNA2/H2AC14/H2AC4/BLM/H2BC14/H2BC7/H2BC17/H2BC8/H4C5/H2BC4/DNA2/FEN1/H2BC11/DSCC1/H2AX/CHTF18/POLD1/H2BC10/H2BC12/LIG1/H4C9/PRIM1/H4C1/CDK2/H2BC9/H4C4/RFC4/RFC3/RFC2/H2BC6/H2AC8/RFC5/POLA2/H4C8/POLD3/H2BC13/H2AZ1/PRIM2/CCNA1/PCNA/RUVBL2/H4C3/H2AC6/RPA2/POLR2D/H3-4/DAXX/H2BC15/H2BC5/RPA3/POLR2G/H2AC19/POLA1/H2AC18/WRAP53/RUVBL1
KEGG_RETINOL_METABOLISM	KEGG_RETINOL_METABOLISM	63	-0.703634	-2.43328	2.43462e-10	1.57439e-08	1.16901e-08	1991	tags=40%, list=6%, signal=37%	ADH7/DHRS3/CYP2C8/UGT1A6/CYP2A6/CYP3A5/RDH8/CYP4A22/UGT2B17/UGT2B11/CYP3A7/ALDH1A1/ADH6/UGT1A8/UGT1A9/UGT2A3/UGT2B28/RDH12/ADH1A/UGT1A1/ADH4/ADH1B/UGT1A7/CYP3A4/ADH1C
WP_DNA_REPLICATION	WP_DNA_REPLICATION	42	0.805524	2.41555	2.81471e-10	1.77467e-08	1.31773e-08	4270	tags=69%, list=12%, signal=61%	CDC45/MCM10/ORC1/CDT1/CDC6/CDC7/POLE2/MCM5/MCM6/ORC6/GMNN/MCM7/MCM2/POLD1/MCM4/PRIM1/MCM3/CDK2/RFC4/RFC3/RFC2/RFC5/POLA2/POLD3/DBF4/PRIM2/RPA4/PCNA/POLE
REACTOME_ACTIVATION_OF_THE_PRE_REPLICATIVE_COMPLEX	REACTOME_ACTIVATION_OF_THE_PRE_REPLICATIVE_COMPLEX	33	0.822996	2.38611	4.97978e-10	3.06317e-08	2.27446e-08	4960	tags=79%, list=14%, signal=68%	CDC45/MCM10/ORC1/CDT1/CDC6/CDC7/POLE2/MCM5/MCM6/ORC6/GMNN/MCM7/MCM2/MCM4/PRIM1/MCM3/CDK2/POLA2/DBF4/PRIM2/MCM8/RPA4/POLE/POLE4/RPA2/POLE3
REACTOME_DISEASES_OF_PROGRAMMED_CELL_DEATH	REACTOME_DISEASES_OF_PROGRAMMED_CELL_DEATH	102	0.639227	2.26437	5.40045e-10	3.24284e-08	2.40787e-08	3551	tags=39%, list=10%, signal=35%	H3C2/H2AC14/H3C3/CDC25C/CDC25A/H2AC4/LMNB1/H2BC14/EZH2/H2BC7/H2BC17/H2BC8/H4C5/H2BC4/H3C11/CDKN2A/H3C7/H3C12/H2BC11/H2AX/H2BC10/H2BC12/H4C9/DNMT3A/PRIM1/H3C8/H4C1/DNMT1/CDC25B/H2BC9/H4C4/H2BC6/H3C14/H2AC8/POLA2/H4C8/H2BC13/H2AZ1/H3C1/PRIM2
REACTOME_INFLUENZA_INFECTION	REACTOME_INFLUENZA_INFECTION	157	0.574346	2.13968	6.56312e-10	3.84935e-08	2.85821e-08	10480	tags=66%, list=30%, signal=46%	KPNA2/ISG15/RPL39L/RAN/NUP188/RPS27A/RPLP0/NDC1/RPL37A/RPS19/KPNA5/RPS7/RPS5/RPS18/RPS3/RPL7A/RPL27A/RPS2/NUP107/KPNA7/NUP62/RPL13A/RPL18A/RPS12/NUP85/RPL35/RPS8/RPL10L/RPL17/POLR2D/RPL18/RPS10/NUP155/RPL36/RPL31/RPL11/RPS16/KPNB1/RPL28/RPS26/RPS29/RPS24/RPL41/UBA52/POLR2G/RPS25/RPL36A/XPO1/RPLP2/RPS6/RPS13/RPS9/RPL22L1/RPL8/RPL7/RPS3A/POLR2L/RPS11/RPS15/RPL23A/RPL12/RPS27/RPL30/NUP35/CLTA/RPS21/…
WP_METAPATHWAY_BIOTRANSFORMATION_PHASE_I_AND_II	WP_METAPATHWAY_BIOTRANSFORMATION_PHASE_I_AND_II	181	-0.515679	-2.10221	1.19474e-09	6.84801e-08	5.08477e-08	5043	tags=42%, list=15%, signal=36%	GSTA5/NDST3/EPHX1/GSTO2/CYP26C1/GSTA1/KCNAB1/GSTK1/CHST9/CYP4F8/CYP4X1/MGST2/GSTM5/FMO5/CYP4F2/UGT2B4/AKR1B1/CYP27A1/CYP2J2/GLYATL1/SLX1A-SULT1A3/EPHX2/UGT2B15/NDST2/GPX3/GLYAT/CYP2S1/AKR1B10/FMO4/SULT1A2/CYP4V2/CYP11B1/CHST4/CHST13/HS3ST3B1/CYP7A1/SULT1E1/CYP2U1/AKR1C1/CYP4F22/CYP8B1/GPX5/HNMT/CYP2C8/SULT1C2/UGT1A6/AKR1C2/CYP2A6/CYP2F1/CYP7B1/CYP3A5/AKR1C3/CHST6/GSTM1/HS3ST3A1/HS3ST4/HS6ST3/GSTA…
REACTOME_HDACS_DEACETYLATE_HISTONES	REACTOME_HDACS_DEACETYLATE_HISTONES	92	0.647988	2.24808	1.57705e-09	8.83846e-08	6.56272e-08	6701	tags=49%, list=19%, signal=39%	H3C2/H2AC14/H2AC12/H3C3/H2AC4/H2BC14/H2BC7/H2BC17/H2BC8/H4C5/H2BC4/H3C11/H2AC17/H3C7/H3C12/H2BC11/H2BC10/H2AC16/H2BC12/H4C9/H3C8/H4C1/H2BC9/H2AC21/H4C4/H2BC6/H3C14/H2AC8/H4C8/H2BC13/H3C1/H4C3/H3C10/MBD3/H2AC13/H2AC6/H3C4/H2BC15/RCOR1/H2BC5/H2BC18/H2AC19/H2AC18/HDAC2/HDAC10
REACTOME_PROCESSING_OF_DNA_DOUBLE_STRAND_BREAK_ENDS	REACTOME_PROCESSING_OF_DNA_DOUBLE_STRAND_BREAK_ENDS	96	0.646305	2.26173	1.70252e-09	9.33423e-08	6.93084e-08	6119	tags=49%, list=18%, signal=40%	EXO1/CLSPN/CCNA2/CHEK1/BLM/RMI2/H2BC14/H2BC7/BRCA1/H2BC17/H2BC8/H4C5/H2BC4/DNA2/BRIP1/H2BC11/TIMELESS/H2AX/H2BC10/H2BC12/H4C9/BARD1/H4C1/CDK2/H2BC9/H4C4/RFC4/RFC3/RFC2/H2BC6/RFC5/H4C8/RPS27A/H2BC13/CCNA1/NSD2/RAD9B/H4C3/RAD1/RPA2/RAD9A/H3-4/TOPBP1/H2BC15/H2BC5/RPA3/UBA52
REACTOME_EPIGENETIC_REGULATION_OF_GENE_EXPRESSION	REACTOME_EPIGENETIC_REGULATION_OF_GENE_EXPRESSION	147	0.582986	2.15403	2.13997e-09	1.1483e-07	8.52632e-08	6638	tags=40%, list=19%, signal=33%	H3C2/UHRF1/H2AC14/H3C3/H2AC4/H2BC14/EZH2/H2BC7/H2BC17/H2BC8/H4C5/H2BC4/H3C11/H3C7/H3C12/H2BC11/H2AX/H2BC10/H2BC12/H4C9/DNMT3A/POLR1E/H3C8/PHF19/TET1/H4C1/DNMT1/H2BC9/H4C4/H2BC6/H3C14/H2AC8/H4C8/DEK/H2BC13/H2AZ1/H3C1/TAF1B/TAF1D/SUV39H1/MTF2/H4C3/H3C10/MBD3/H2AC6/SIN3B/H3C4/TAF1A/H2BC15/H2BC5/DNMT3B/JARID2/TET3/TDG/CBX3/H2AC19/H2AC18/HDAC2/EED
BIOCARTA_MCM_PATHWAY	BIOCARTA_MCM_PATHWAY	18	0.89882	2.30297	2.97662e-09	1.56397e-07	1.16127e-07	2189	tags=67%, list=6%, signal=62%	ORC1/CDT1/CDC6/MCM5/MCM6/ORC6/MCM7/CCNE1/MCM2/MCM4/MCM3/CDK2
REACTOME_CONDENSATION_OF_PROPHASE_CHROMOSOMES	REACTOME_CONDENSATION_OF_PROPHASE_CHROMOSOMES	73	0.694894	2.34296	3.33621e-09	1.71713e-07	1.275e-07	6142	tags=63%, list=18%, signal=52%	H3C2/PLK1/CDK1/H2AC14/H3C3/H2AC4/CCNB1/H2BC14/H2BC7/H2BC17/H2BC8/H4C5/H2BC4/H3C11/H3C7/H3C12/H2BC11/H2AX/H2BC10/H2BC12/H4C9/H3C8/H4C1/NCAPG2/H2BC9/H4C4/H2BC6/H3C14/NCAPD3/H2AC8/SMC2/H4C8/H2BC13/H2AZ1/H3C1/SMC4/H4C3/H3C10/H2AC6/NCAPH2/KMT5A/H3C4/H3-4/H2BC15/H2BC5/SET
REACTOME_DNA_DAMAGE_TELOMERE_STRESS_INDUCED_SENESCENCE	REACTOME_DNA_DAMAGE_TELOMERE_STRESS_INDUCED_SENESCENCE	79	0.66185	2.23434	4.69236e-09	2.36683e-07	1.75741e-07	3839	tags=42%, list=11%, signal=37%	HMGA2/CCNA2/H2AC14/H1-5/H2AC4/LMNB1/H2BC14/H2BC7/H1-4/H2BC17/H2BC8/H4C5/H2BC4/CCNE2/H2BC11/CCNE1/H2AX/H2BC10/H2BC12/H4C9/H4C1/CDK2/H2BC9/H4C4/H1-2/H2BC6/H2AC8/H1-3/H4C8/H2BC13/H2AZ1/CCNA1/HMGA1
PID_AURORA_B_PATHWAY	PID_AURORA_B_PATHWAY	39	0.780984	2.32234	5.12435e-09	2.53404e-07	1.88157e-07	754	tags=38%, list=2%, signal=38%	KIF2C/BIRC5/CENPA/AURKB/CDCA8/KIF20A/NCAPH/SGO1/NCAPG/BUB1/NDC80/KIF23/RACGAP1/AURKA/STMN1
KEGG_DNA_REPLICATION	KEGG_DNA_REPLICATION	36	0.78974	2.31999	6.06325e-09	2.94067e-07	2.1835e-07	4960	tags=72%, list=14%, signal=62%	POLE2/MCM5/MCM6/DNA2/FEN1/MCM7/MCM2/POLD1/LIG1/MCM4/PRIM1/MCM3/RNASEH2A/RFC4/RFC3/RFC2/RFC5/POLA2/POLD3/PRIM2/RPA4/PCNA/POLE/POLE4/RPA2/POLE3
REACTOME_DNA_STRAND_ELONGATION	REACTOME_DNA_STRAND_ELONGATION	32	0.814892	2.33469	6.45565e-09	3.06996e-07	2.27951e-07	4091	tags=75%, list=12%, signal=66%	CDC45/GINS2/GINS1/GINS4/MCM5/MCM6/DNA2/FEN1/MCM7/MCM2/POLD1/LIG1/MCM4/PRIM1/MCM3/RFC4/RFC3/RFC2/RFC5/POLA2/POLD3/PRIM2/MCM8/PCNA
REACTOME_HCMV_LATE_EVENTS	REACTOME_HCMV_LATE_EVENTS	114	0.616554	2.20102	6.57328e-09	3.06996e-07	2.27951e-07	6002	tags=39%, list=17%, signal=33%	H3C2/H2AC14/H2AC12/H3C3/H2AC4/H2BC14/H2BC7/H2BC17/H2BC8/H4C5/H2BC4/H3C11/H2AC17/H3C7/H3C12/H2BC11/H2BC10/H2AC16/H2BC12/H4C9/H3C8/H4C1/H2BC9/H2AC21/H4C4/H2BC6/H3C14/H2AC8/NUP188/H4C8/H2BC13/NDC1/H3C1/NUP107/NUP62/H4C3/H3C10/H2AC13/NUP85/H2AC6/H3C4/NUP155/H2BC15/H2BC5/H2BC18
KEGG_ASTHMA	KEGG_ASTHMA	28	-0.823657	-2.38043	7.07609e-09	3.24471e-07	2.40925e-07	2527	tags=57%, list=7%, signal=53%	CD40/TNF/HLA-DMA/CD40LG/HLA-DRB1/IL3/HLA-DQB1/HLA-DPB1/HLA-DQA1/HLA-DRA/HLA-DPA1/CCL11/HLA-DQA2/HLA-DOA/HLA-DRB5/MS4A2
REACTOME_HDR_THROUGH_HOMOLOGOUS_RECOMBINATION_HRR	REACTOME_HDR_THROUGH_HOMOLOGOUS_RECOMBINATION_HRR	68	0.686415	2.28321	7.24109e-09	3.26108e-07	2.42141e-07	7448	tags=60%, list=22%, signal=47%	EXO1/RAD51/EME1/CHEK1/BRCA2/RAD51AP1/BLM/RMI2/BRCA1/POLE2/XRCC2/DNA2/BRIP1/POLD1/BARD1/RFC4/RFC3/RFC2/XRCC3/GEN1/RFC5/RPS27A/POLD3/PCNA/POLE/POLE4/RAD9B/RAD1/RPA2/POLE3/RAD9A/TOPBP1/RPA3/UBA52/RBBP8/RAD51C/RMI1/RAD51B/POLD2/MRE11/RHNO1
REACTOME_MEIOTIC_RECOMBINATION	REACTOME_MEIOTIC_RECOMBINATION	86	0.65029	2.22263	7.6455e-09	3.27251e-07	2.4299e-07	6713	tags=59%, list=19%, signal=48%	H3C2/RAD51/H2AC14/H3C3/BRCA2/H2AC4/BLM/DMC1/H2BC14/H2BC7/BRCA1/H2BC17/H2BC8/H4C5/H2BC4/TEX15/H3C11/H3C7/PSMC3IP/H3C12/H2BC11/H2AX/H2BC10/H2BC12/H4C9/H3C8/H4C1/CDK2/H2BC9/H4C4/H2BC6/H3C14/H2AC8/H4C8/H2BC13/H2AZ1/H3C1/H4C3/H3C10/H2AC6/RPA2/H3C4/H3-4/H2BC15/H2BC5/RPA3/PRDM9/H2AC19/RBBP8/H2AC18/CDK4
REACTOME_FACTORS_INVOLVED_IN_MEGAKARYOCYTE_DEVELOPMENT_AND_PLATELET_PRODUCTION	REACTOME_FACTORS_INVOLVED_IN_MEGAKARYOCYTE_DEVELOPMENT_AND_PLATELET_PRODUCTION	167	0.557005	2.09893	7.40771e-09	3.27251e-07	2.4299e-07	4624	tags=28%, list=13%, signal=24%	H3C2/KIF2C/KIFC1/KIF20A/KIF18B/KIF4A/KIF23/H3C3/KIF11/KIF15/RACGAP1/KIF18A/TUBA3C/HBB/CENPE/TUBB2B/H3C11/TUBB6/HBD/H3C7/KIF20B/H3C12/GATA5/IFNA5/KIF26A/GATA3/H3C8/IFNB1/CDK2/TUBB2A/GATA4/WEE1/TUBB3/H3C14/TUBB4B/KIF22/MICAL1/KIF1A/H3C1/KIF4B/KIF26B/TUBA1B/GATA1/MAFF/H3C10/TUBB1
REACTOME_REGULATION_OF_TP53_ACTIVITY	REACTOME_REGULATION_OF_TP53_ACTIVITY	160	0.557366	2.08	7.65575e-09	3.27251e-07	2.4299e-07	7448	tags=38%, list=22%, signal=30%	TP73/POU4F1/AURKB/EXO1/CDK1/CCNA2/CHEK1/TPX2/BLM/AURKA/RMI2/BRCA1/TAF7L/DNA2/BRIP1/CDKN2A/MAPK11/BARD1/CDK2/RFC4/RFC3/RFC2/SMYD2/CHEK2/RFC5/RPS27A/DYRK2/CCNA1/RAD9B/PPP2R1A/TAF5/RAD1/PIP4P1/MBD3/RPA2/KMT5A/RAD9A/NOC2L/SUPT16H/TAF13/EHMT1/SSRP1/PPP2R5C/TOPBP1/DAXX/RPA3/UBA52/PPP2R1B/RBBP8/PRMT5/HDAC2/TAF9/CDK5R1/POU4F2/RMI1/ING5/BANP/BRPF3/MRE11/RHNO1
REACTOME_ASSEMBLY_OF_THE_ORC_COMPLEX_AT_THE_ORIGIN_OF_REPLICATION	REACTOME_ASSEMBLY_OF_THE_ORC_COMPLEX_AT_THE_ORIGIN_OF_REPLICATION	68	0.684789	2.27781	8.47598e-09	3.56274e-07	2.6454e-07	3543	tags=46%, list=10%, signal=41%	H3C2/H2AC14/ORC1/H3C3/H2AC4/H2BC14/H2BC7/H2BC17/H2BC8/H4C5/H2BC4/H3C11/ORC6/H3C7/H3C12/H2BC11/H2AX/H2BC10/H2BC12/H4C9/H3C8/H4C1/H2BC9/H4C4/H2BC6/H3C14/H2AC8/H4C8/H2BC13/H2AZ1/H3C1
REACTOME_OXIDATIVE_STRESS_INDUCED_SENESCENCE	REACTOME_OXIDATIVE_STRESS_INDUCED_SENESCENCE	123	0.590648	2.12605	1.05894e-08	4.37811e-07	3.25083e-07	7440	tags=49%, list=22%, signal=38%	H3C2/E2F2/H2AC14/H3C3/H2AC4/H2BC14/EZH2/H2BC7/CBX2/H2BC17/H2BC8/H4C5/H2BC4/H3C11/CDKN2A/H3C7/E2F1/H3C12/H2BC11/H2AX/H2BC10/H2BC12/H4C9/MAPK11/H3C8/IFNB1/H4C1/H2BC9/H4C4/H2BC6/H3C14/H2AC8/H4C8/RPS27A/H2BC13/CDKN2D/H2AZ1/H3C1/CDKN2C/H4C3/H3C10/PHC2/H2AC6/TFDP1/MAP4K4/H3C4/AGO1/H2BC15/H2BC5/UBA52/H2AC19/E2F3/H2AC18/EED/CDK4/AGO3/CBX8/FOS/RNF2/JUN
PID_ATR_PATHWAY	PID_ATR_PATHWAY	39	0.77222	2.29628	1.14501e-08	4.51204e-07	3.35027e-07	5259	tags=62%, list=15%, signal=52%	PLK1/CLSPN/RAD51/CCNA2/CDC25C/CHEK1/BRCA2/CDC25A/CDC6/FANCD2/MCM7/MCM2/TIMELESS/CDK2/RFC4/RFC3/RFC2/RFC5/SSPOP/CEP164/PPP2R1A/RAD1/RPA2/RAD9A
REACTOME_PHASE_I_FUNCTIONALIZATION_OF_COMPOUNDS	REACTOME_PHASE_I_FUNCTIONALIZATION_OF_COMPOUNDS	104	-0.585398	-2.1851	1.11063e-08	4.51204e-07	3.35027e-07	2827	tags=36%, list=8%, signal=33%	CYP2S1/TBXAS1/ALDH2/CYP4V2/CYP4A11/ALDH3A1/CYP11B1/CYP7A1/CYP2U1/CYP4F22/ADH7/CYP8B1/CYP2C8/CYP2A6/MAOA/CYP2F1/CYP7B1/PTGS1/CYP3A5/AADAC/MAOB/CYP4A22/FMO2/CYP4F12/CYP3A7/ALDH1A1/CYP4B1/CYP4F11/ADH6/CES1/FMO3/ADH1A/CYP11B2/ADH4/ADH1B/CYP3A4/ADH1C
REACTOME_SENESCENCE_ASSOCIATED_SECRETORY_PHENOTYPE_SASP	REACTOME_SENESCENCE_ASSOCIATED_SECRETORY_PHENOTYPE_SASP	111	0.609515	2.17603	1.12905e-08	4.51204e-07	3.35027e-07	3661	tags=35%, list=11%, signal=32%	H3C2/UBE2C/CXCL8/CCNA2/H2AC14/H3C3/H2AC4/H2BC14/H2BC7/H2BC17/H2BC8/IL6/H4C5/H2BC4/UBE2S/H3C11/CDKN2A/H3C7/H3C12/H2BC11/H2AX/H2BC10/H2BC12/H4C9/H3C8/H4C1/CDK2/H2BC9/H4C4/H2BC6/H3C14/H2AC8/H4C8/RPS27A/H2BC13/CDKN2D/H2AZ1/H3C1/CCNA1
KEGG_STEROID_HORMONE_BIOSYNTHESIS	KEGG_STEROID_HORMONE_BIOSYNTHESIS	54	-0.696681	-2.34121	1.46724e-08	5.69291e-07	4.22709e-07	2602	tags=43%, list=8%, signal=39%	CYP11B1/CYP7A1/SULT1E1/AKR1C1/UGT1A6/AKR1C2/CYP7B1/CYP3A5/AKR1C3/HSD3B2/UGT2B17/UGT2B11/AKR1D1/CYP3A7/HSD17B6/UGT1A8/UGT1A9/UGT2A3/UGT2B28/UGT1A1/CYP11B2/UGT1A7/CYP3A4
REACTOME_PD_1_SIGNALING	REACTOME_PD_1_SIGNALING	26	-0.824534	-2.34114	1.6089e-08	6.14793e-07	4.56495e-07	2833	tags=65%, list=8%, signal=60%	CD3E/CD247/CD4/PDCD1/TRBV7-9/TRAV29DV5/TRAV8-4/HLA-DRB1/HLA-DQB2/HLA-DQB1/HLA-DPB1/HLA-DQA1/HLA-DRA/HLA-DPA1/HLA-DQA2/TRBV12-3/HLA-DRB5
REACTOME_PRC2_METHYLATES_HISTONES_AND_DNA	REACTOME_PRC2_METHYLATES_HISTONES_AND_DNA	72	0.676002	2.27409	1.72607e-08	6.49725e-07	4.82433e-07	6638	tags=62%, list=19%, signal=51%	H3C2/H2AC14/H3C3/H2AC4/H2BC14/EZH2/H2BC7/H2BC17/H2BC8/H4C5/H2BC4/H3C11/H3C7/H3C12/H2BC11/H2AX/H2BC10/H2BC12/H4C9/DNMT3A/H3C8/PHF19/H4C1/DNMT1/H2BC9/H4C4/H2BC6/H3C14/H2AC8/H4C8/H2BC13/H2AZ1/H3C1/MTF2/H4C3/H3C10/H2AC6/H3C4/H2BC15/H2BC5/DNMT3B/JARID2/H2AC19/H2AC18/EED
REACTOME_REGULATION_OF_TP53_ACTIVITY_THROUGH_PHOSPHORYLATION	REACTOME_REGULATION_OF_TP53_ACTIVITY_THROUGH_PHOSPHORYLATION	92	0.621506	2.15621	1.88418e-08	6.9881e-07	5.18879e-07	7448	tags=45%, list=22%, signal=35%	AURKB/EXO1/CCNA2/CHEK1/TPX2/BLM/AURKA/RMI2/BRCA1/TAF7L/DNA2/BRIP1/MAPK11/BARD1/CDK2/RFC4/RFC3/RFC2/CHEK2/RFC5/RPS27A/DYRK2/CCNA1/RAD9B/TAF5/RAD1/RPA2/RAD9A/NOC2L/SUPT16H/TAF13/SSRP1/TOPBP1/RPA3/UBA52/RBBP8/TAF9/CDK5R1/RMI1/MRE11/RHNO1
REACTOME_GENERATION_OF_SECOND_MESSENGER_MOLECULES	REACTOME_GENERATION_OF_SECOND_MESSENGER_MOLECULES	37	-0.763168	-2.35073	2.1694e-08	7.92933e-07	5.88767e-07	3375	tags=59%, list=10%, signal=54%	LCP2/WAS/PAK3/CD3E/CD247/CD4/GRAP2/TRBV7-9/TRAV29DV5/TRAV8-4/ITK/HLA-DRB1/FYB1/HLA-DQB2/HLA-DQB1/HLA-DPB1/HLA-DQA1/HLA-DRA/HLA-DPA1/HLA-DQA2/TRBV12-3/HLA-DRB5
REACTOME_B_WICH_COMPLEX_POSITIVELY_REGULATES_RRNA_EXPRESSION	REACTOME_B_WICH_COMPLEX_POSITIVELY_REGULATES_RRNA_EXPRESSION	90	0.631313	2.18059	2.74972e-08	9.90684e-07	7.35601e-07	4796	tags=40%, list=14%, signal=35%	H3C2/H2AC14/H3C3/H2AC4/H2BC14/H2BC7/H2BC17/H2BC8/H4C5/H2BC4/H3C11/H3C7/H3C12/H2BC11/H2AX/H2BC10/H2BC12/H4C9/POLR1E/H3C8/H4C1/H2BC9/H4C4/H2BC6/H3C14/H2AC8/H4C8/DEK/H2BC13/H2AZ1/H3C1/TAF1B/TAF1D/H4C3/H3C10/H2AC6
REACTOME_MEIOSIS	REACTOME_MEIOSIS	118	0.592305	2.11886	2.98898e-08	1.06172e-06	7.88346e-07	3543	tags=36%, list=10%, signal=33%	H3C2/SMC1B/RAD51/H2AC14/H3C3/BRCA2/H2AC4/BLM/DMC1/LMNB1/H2BC14/H2BC7/BRCA1/H2BC17/H2BC8/H4C5/H2BC4/TEX15/H3C11/H3C7/SYCP2/PSMC3IP/H3C12/H2BC11/SYCE2/H2AX/H2BC10/STAG3/H2BC12/H4C9/REC8/H3C8/H4C1/CDK2/H2BC9/H4C4/H2BC6/H3C14/H2AC8/H4C8/H2BC13/H2AZ1/H3C1
WP_G1_TO_S_CELL_CYCLE_CONTROL	WP_G1_TO_S_CELL_CYCLE_CONTROL	64	0.688599	2.27658	3.18609e-08	1.11602e-06	8.28663e-07	6018	tags=55%, list=17%, signal=45%	CDC45/E2F2/CDK1/ORC1/CDC25A/CCNB1/POLE2/MCM5/MCM6/CCNE2/ORC6/CDKN2A/E2F1/MCM7/CCNE1/MCM2/MCM4/PRIM1/MCM3/CDK2/WEE1/MYC/POLA2/CDKN2D/PRIM2/CCNA1/PCNA/MYT1/POLE/CDKN2C/RPA2/TFDP1/GADD45A/CREB3/RPA3
REACTOME_DNA_METHYLATION	REACTOME_DNA_METHYLATION	64	0.6884	2.27592	3.27647e-08	1.11666e-06	8.29139e-07	3543	tags=50%, list=10%, signal=45%	H3C2/UHRF1/H2AC14/H3C3/H2AC4/H2BC14/H2BC7/H2BC17/H2BC8/H4C5/H2BC4/H3C11/H3C7/H3C12/H2BC11/H2AX/H2BC10/H2BC12/H4C9/DNMT3A/H3C8/H4C1/DNMT1/H2BC9/H4C4/H2BC6/H3C14/H2AC8/H4C8/H2BC13/H2AZ1/H3C1
REACTOME_TRANSCRIPTIONAL_REGULATION_BY_SMALL_RNAS	REACTOME_TRANSCRIPTIONAL_REGULATION_BY_SMALL_RNAS	106	0.603039	2.13518	3.26362e-08	1.11666e-06	8.29139e-07	6590	tags=45%, list=19%, signal=37%	H3C2/H2AC14/H3C3/H2AC4/H2BC14/H2BC7/H2BC17/H2BC8/H4C5/H2BC4/H3C11/H3C7/H3C12/H2BC11/H2AX/H2BC10/H2BC12/H4C9/H3C8/H4C1/H2BC9/H4C4/H2BC6/H3C14/H2AC8/RAN/NUP188/H4C8/H2BC13/NDC1/H2AZ1/H3C1/NUP107/AGO2/NUP62/H4C3/H3C10/NUP85/H2AC6/POLR2D/H3C4/NUP155/AGO1/H2BC15/H2BC5/POLR2G/H2AC19/H2AC18
REACTOME_REPRODUCTION	REACTOME_REPRODUCTION	144	0.558179	2.05845	3.41405e-08	1.14803e-06	8.52433e-07	3547	tags=33%, list=10%, signal=30%	H3C2/SMC1B/RAD51/H2AC14/H3C3/BRCA2/H2AC4/BLM/DMC1/LMNB1/H2BC14/H2BC7/BRCA1/H2BC17/H2BC8/H4C5/H2BC4/TEX15/H3C11/H3C7/SYCP2/PSMC3IP/H3C12/H2BC11/CATSPERD/SYCE2/H2AX/H2BC10/STAG3/H2BC12/KCNU1/H4C9/REC8/H3C8/H4C1/CDK2/H2BC9/H4C4/IZUMO1/H2BC6/ZP4/H3C14/H2AC8/H4C8/H2BC13/H2AZ1/H3C1/IZUMO3
WP_COHESIN_COMPLEX_CORNELIA_DE_LANGE_SYNDROME	WP_COHESIN_COMPLEX_CORNELIA_DE_LANGE_SYNDROME	34	0.788188	2.28491	4.38509e-08	1.45516e-06	1.08048e-06	1978	tags=35%, list=6%, signal=33%	AURKB/PLK1/ESCO2/SMC1B/CDCA5/SGO1/CDK1/PTTG1/SGO2/ESPL1/STAG3/REC8
REACTOME_BASE_EXCISION_REPAIR	REACTOME_BASE_EXCISION_REPAIR	90	0.627054	2.16588	4.51411e-08	1.47852e-06	1.09783e-06	6590	tags=51%, list=19%, signal=41%	H2AC14/NEIL3/H2AC4/H2BC14/H2BC7/POLE2/H2BC17/H2BC8/H4C5/H2BC4/FEN1/H2BC11/H2AX/POLD1/H2BC10/H2BC12/LIG1/H4C9/H4C1/H2BC9/H4C4/RFC4/RFC3/RFC2/H2BC6/H2AC8/RFC5/H4C8/POLD3/H2BC13/H2AZ1/PCNA/POLE/POLE4/H4C3/H2AC6/PARP2/RPA2/POLE3/H3-4/H2BC15/H2BC5/RPA3/TDG/H2AC19/H2AC18
WP_MIRNA_REGULATION_OF_DNA_DAMAGE_RESPONSE	WP_MIRNA_REGULATION_OF_DNA_DAMAGE_RESPONSE	82	0.633082	2.14553	4.95952e-08	1.60358e-06	1.19069e-06	3068	tags=27%, list=9%, signal=24%	CCNB2/SFN/CDK1/RAD51/CDC25C/CHEK1/CDC25A/CCNB1/MIR210/BRCA1/FANCD2/CCNE2/E2F1/MCM7/CCNE1/HUS1B/H2AX/MIR221/CDK2/TP53AIP1/CHEK2/MYC
REACTOME_SIRT1_NEGATIVELY_REGULATES_RRNA_EXPRESSION	REACTOME_SIRT1_NEGATIVELY_REGULATES_RRNA_EXPRESSION	67	0.669044	2.22829	5.29527e-08	1.69046e-06	1.2552e-06	5954	tags=58%, list=17%, signal=48%	H3C2/H2AC14/H3C3/H2AC4/H2BC14/H2BC7/H2BC17/H2BC8/H4C5/H2BC4/H3C11/H3C7/H3C12/H2BC11/H2AX/H2BC10/H2BC12/H4C9/H3C8/H4C1/H2BC9/H4C4/H2BC6/H3C14/H2AC8/H4C8/H2BC13/H2AZ1/H3C1/TAF1B/TAF1D/SUV39H1/H4C3/H3C10/H2AC6/H3C4/TAF1A/H2BC15/H2BC5
REACTOME_ERCC6_CSB_AND_EHMT2_G9A_POSITIVELY_REGULATE_RRNA_EXPRESSION	REACTOME_ERCC6_CSB_AND_EHMT2_G9A_POSITIVELY_REGULATE_RRNA_EXPRESSION	75	0.645316	2.17692	7.04948e-08	2.22235e-06	1.65014e-06	6598	tags=53%, list=19%, signal=43%	H3C2/H2AC14/H3C3/H2AC4/H2BC14/H2BC7/H2BC17/H2BC8/H4C5/H2BC4/H3C11/H3C7/H3C12/H2BC11/H2AX/H2BC10/H2BC12/H4C9/H3C8/H4C1/H2BC9/H4C4/H2BC6/H3C14/H2AC8/H4C8/H2BC13/H2AZ1/H3C1/H4C3/H3C10/MBD3/H2AC6/H3C4/H2BC15/H2BC5/CBX3/H2AC19/H2AC18/HDAC2
REACTOME_RNA_POLYMERASE_I_PROMOTER_ESCAPE	REACTOME_RNA_POLYMERASE_I_PROMOTER_ESCAPE	90	0.622577	2.15041	7.46719e-08	2.32497e-06	1.72633e-06	6590	tags=47%, list=19%, signal=38%	H3C2/H2AC14/H3C3/H2AC4/H2BC14/H2BC7/H2BC17/H2BC8/H4C5/H2BC4/H3C11/H3C7/H3C12/H2BC11/H2AX/H2BC10/H2BC12/H4C9/POLR1E/H3C8/H4C1/H2BC9/H4C4/H2BC6/H3C14/H2AC8/H4C8/H2BC13/H2AZ1/H3C1/TAF1B/TAF1D/H4C3/H3C10/H2AC6/H3C4/TAF1A/H2BC15/H2BC5/CBX3/H2AC19/H2AC18
REACTOME_EXTRACELLULAR_MATRIX_ORGANIZATION	REACTOME_EXTRACELLULAR_MATRIX_ORGANIZATION	299	0.459062	1.8251	8.00144e-08	2.46093e-06	1.82729e-06	3856	tags=31%, list=11%, signal=28%	COL2A1/LAMA1/MMP10/MMP12/ICAM5/TNC/CTRB2/IBSP/ACAN/MMP13/COL22A1/MMP1/ADAM12/COL20A1/CTRB1/BMP7/COL11A1/ELN/CTSV/MMP9/MMP7/MMP14/COL5A3/NCAN/NID2/COMP/COL5A1/COL3A1/MATN3/MMP17/COL5A2/COL13A1/COL6A3/LAMA4/P4HA3/ADAMTS2/MFAP2/MMP20/COL4A2/MMP8/ADAMTS4/ITGB3/LUM/CEACAM6/FN1/FBN2/EMILIN1/ADAMTS14/P3H3/DCN/COL8A1/COL7A1/ITGA2B/ITGA7/COL4A1/PCOLCE/PXDN/ADAM8/LTBP2/COL1A2/SPARC/ELANE/ADAM19/MFAP5/BMP1/…
REACTOME_RNA_POLYMERASE_I_TRANSCRIPTION	REACTOME_RNA_POLYMERASE_I_TRANSCRIPTION	110	0.589209	2.09812	9.59518e-08	2.91555e-06	2.16485e-06	6598	tags=40%, list=19%, signal=32%	H3C2/H2AC14/H3C3/H2AC4/H2BC14/H2BC7/H2BC17/H2BC8/H4C5/H2BC4/H3C11/H3C7/H3C12/H2BC11/H2AX/H2BC10/H2BC12/H4C9/POLR1E/H3C8/H4C1/H2BC9/H4C4/H2BC6/H3C14/H2AC8/H4C8/H2BC13/H2AZ1/H3C1/TAF1B/TAF1D/H4C3/H3C10/MBD3/H2AC6/H3C4/TAF1A/H2BC15/H2BC5/CBX3/H2AC19/H2AC18/HDAC2
REACTOME_ECM_PROTEOGLYCANS	REACTOME_ECM_PROTEOGLYCANS	76	0.65574	2.21736	9.86851e-08	2.9629e-06	2.20001e-06	3756	tags=42%, list=11%, signal=38%	COL2A1/LAMA1/TNC/IBSP/ACAN/COL5A3/NCAN/COMP/COL5A1/COL3A1/MATN3/COL5A2/COL6A3/LAMA4/COL4A2/ITGB3/LUM/FN1/DCN/ITGA2B/ITGA7/COL4A1/COL1A2/SPARC/COL9A1/MATN4/TGFB3/COL6A2/COL1A1/SERPINE1/LAMA2/HAPLN1
REACTOME_CYCLIN_A_B1_B2_ASSOCIATED_EVENTS_DURING_G2_M_TRANSITION	REACTOME_CYCLIN_A_B1_B2_ASSOCIATED_EVENTS_DURING_G2_M_TRANSITION	25	0.813965	2.21583	1.08756e-07	3.22685e-06	2.39599e-06	2689	tags=48%, list=8%, signal=44%	CCNB2/PLK1/CDK1/PKMYT1/CCNA2/FOXM1/CDC25C/CDC25A/CCNB1/CDK2/CDC25B/WEE1
REACTOME_POSITIVE_EPIGENETIC_REGULATION_OF_RRNA_EXPRESSION	REACTOME_POSITIVE_EPIGENETIC_REGULATION_OF_RRNA_EXPRESSION	105	0.604817	2.13999	1.11761e-07	3.25696e-06	2.41835e-06	6598	tags=43%, list=19%, signal=35%	H3C2/H2AC14/H3C3/H2AC4/H2BC14/H2BC7/H2BC17/H2BC8/H4C5/H2BC4/H3C11/H3C7/H3C12/H2BC11/H2AX/H2BC10/H2BC12/H4C9/POLR1E/H3C8/H4C1/H2BC9/H4C4/H2BC6/H3C14/H2AC8/H4C8/DEK/H2BC13/H2AZ1/H3C1/TAF1B/TAF1D/H4C3/H3C10/MBD3/H2AC6/H3C4/TAF1A/H2BC15/H2BC5/CBX3/H2AC19/H2AC18/HDAC2
REACTOME_NEGATIVE_EPIGENETIC_REGULATION_OF_RRNA_EXPRESSION	REACTOME_NEGATIVE_EPIGENETIC_REGULATION_OF_RRNA_EXPRESSION	108	0.593675	2.10991	1.12353e-07	3.25696e-06	2.41835e-06	6598	tags=43%, list=19%, signal=35%	H3C2/H2AC14/H3C3/H2AC4/H2BC14/H2BC7/H2BC17/H2BC8/H4C5/H2BC4/H3C11/H3C7/H3C12/H2BC11/H2AX/H2BC10/H2BC12/H4C9/POLR1E/H3C8/H4C1/DNMT1/H2BC9/H4C4/H2BC6/H3C14/H2AC8/H4C8/H2BC13/H2AZ1/H3C1/TAF1B/TAF1D/SUV39H1/H4C3/H3C10/H2AC6/SIN3B/H3C4/TAF1A/H2BC15/H2BC5/DNMT3B/H2AC19/H2AC18/HDAC2
REACTOME_EXTENSION_OF_TELOMERES	REACTOME_EXTENSION_OF_TELOMERES	51	0.69695	2.17937	1.23442e-07	3.53773e-06	2.62683e-06	4256	tags=43%, list=12%, signal=38%	TERT/PIF1/CCNA2/BLM/DNA2/FEN1/DSCC1/CHTF18/POLD1/LIG1/PRIM1/CDK2/RFC4/RFC3/RFC2/RFC5/POLA2/POLD3/PRIM2/CCNA1/PCNA/RUVBL2
REACTOME_GENE_SILENCING_BY_RNA	REACTOME_GENE_SILENCING_BY_RNA	139	0.546102	2.00621	1.33185e-07	3.77409e-06	2.80233e-06	6590	tags=40%, list=19%, signal=33%	H3C2/H2AC14/H3C3/TDRD12/H2AC4/MOV10L1/H2BC14/H2BC7/H2BC17/H2BC8/H4C5/H2BC4/H3C11/H3C7/H3C12/H2BC11/MYBL1/H2AX/H2BC10/H2BC12/H4C9/H3C8/H4C1/H2BC9/H4C4/H2BC6/H3C14/H2AC8/RAN/NUP188/H4C8/PIWIL1/H2BC13/NDC1/H2AZ1/H3C1/PIWIL4/ANG/NUP107/AGO2/NUP62/H4C3/H3C10/NUP85/H2AC6/POLR2D/H3C4/NUP155/AGO1/DDX4/H2BC15/H2BC5/POLR2G/H2AC19/TARBP2/H2AC18
PID_FANCONI_PATHWAY	PID_FANCONI_PATHWAY	47	0.718333	2.21399	1.37531e-07	3.85392e-06	2.8616e-06	5259	tags=55%, list=15%, signal=47%	CHEK1/BRCA2/UBE2T/BLM/BRCA1/FANCG/FANCD2/FANCI/BRIP1/FANCB/H2AX/FANCA/FANCE/FANCC/RFC4/RFC3/RFC2/USP1/XRCC3/RFC5/SSPOP/FANCM/HES1/RAD1/RPA2/RAD9A
WP_DNA_REPAIR_PATHWAYS_FULL_NETWORK	WP_DNA_REPAIR_PATHWAYS_FULL_NETWORK	120	0.583238	2.08845	1.39687e-07	3.87134e-06	2.87454e-06	4960	tags=31%, list=14%, signal=26%	EXO1/RAD51/NEIL3/CHEK1/BRCA2/BRCA1/POLE2/FANCG/FANCD2/FANCI/BRIP1/FEN1/FANCB/H2AX/POLD1/FANCA/LIG1/FANCE/FANCC/RFC4/RFC3/RFC2/RAD54B/MSH2/USP1/RFC5/POLD3/PCNA/POLE/POLE4/MSH6/FANCM/CENPX/DCLRE1C/PARP2/RPA2/POLE3
REACTOME_RUNX1_REGULATES_GENES_INVOLVED_IN_MEGAKARYOCYTE_DIFFERENTIATION_AND_PLATELET_FUNCTION	REACTOME_RUNX1_REGULATES_GENES_INVOLVED_IN_MEGAKARYOCYTE_DIFFERENTIATION_AND_PLATELET_FUNCTION	96	0.608954	2.13102	1.56108e-07	4.20864e-06	3.125e-06	5954	tags=45%, list=17%, signal=37%	H3C2/H2AC14/H3C3/H2AC4/H2BC14/H2BC7/H2BC17/H2BC8/H4C5/H2BC4/H3C11/H3C7/H3C12/H2BC11/H2AX/H2BC10/H2BC12/H4C9/ITGA2B/H3C8/H4C1/H2BC9/H4C4/H2BC6/H3C14/H2AC8/NR4A3/H4C8/H2BC13/H2AZ1/H3C1/WDR5/PRKCQ/CBFB/GATA1/H4C3/H3C10/H2AC6/SIN3B/H3C4/AGO1/H2BC15/H2BC5
KEGG_RIBOSOME	KEGG_RIBOSOME	88	0.617502	2.12204	1.56865e-07	4.20864e-06	3.125e-06	9543	tags=72%, list=28%, signal=52%	RPS27A/RPLP0/RPL37A/RPS19/RPS7/RPS5/RPS18/RPS3/RPL7A/RPL27A/RPS2/RPL13A/RPL18A/RPS12/RPL35/RPS8/RPL10L/RPL17/RPL18/RPS10/RPL36/RPL31/RPL11/RPS16/RPL28/RPS26/RPS29/RPS24/RPL41/UBA52/RPS25/RPL36A/RPLP2/RPS6/RPS13/RPS9/RPL22L1/RPL8/RPL7/RPS3A/RPS11/RPS15/RPL23A/RPL12/RPS27/RPL30/RPS21/RPL10A/RPL13/RPS15A/RPL21/RPL5/RPS17/RPL3/RPL27/RPL6/RSL24D1P11/RPL3L/RPL29/RPS28/RPL22/RPL4/RPL36AL
REACTOME_RRNA_PROCESSING	REACTOME_RRNA_PROCESSING	202	0.503294	1.92523	1.55542e-07	4.20864e-06	3.125e-06	10942	tags=60%, list=32%, signal=41%	RPL39L/RPS27A/RPLP0/RPL37A/RPS19/RPS7/RPS5/RPS18/RPS3/RPL7A/RPL27A/RPS2/RRP36/RPL13A/RPL18A/WDR18/RPS12/RPL35/RPS8/RPL10L/FBL/RPL17/RPL18/RPS10/MRM2/RPL36/RPP40/EXOSC2/RPL31/RPL11/RPS16/ISG20L2/RPL28/RPS26/NOP58/RPS29/RPS24/RPL41/UBA52/RPS25/BYSL/RPL36A/NIP7/CSNK1E/UTP11/RPLP2/RPS6/NSUN4/NOL9/RPS13/RPS9/FCF1/RPL22L1/EXOSC3/EXOSC10/EXOSC8/BOP1/RPL8/RPL7/RPS3A/RPS11/ERI1/RIOK1/RPS15/PES1/RPL23A/RPL…
REACTOME_SRP_DEPENDENT_COTRANSLATIONAL_PROTEIN_TARGETING_TO_MEMBRANE	REACTOME_SRP_DEPENDENT_COTRANSLATIONAL_PROTEIN_TARGETING_TO_MEMBRANE	113	0.573422	2.04826	2.18881e-07	5.81072e-06	4.31457e-06	10875	tags=74%, list=32%, signal=51%	RPL39L/RPS27A/RPLP0/RPL37A/RPS19/RPS7/RPS5/RPS18/RPS3/RPL7A/RPL27A/RPS2/RPL13A/RPL18A/RPS12/RPL35/RPS8/RPL10L/RPL17/RPL18/SRPRB/RPS10/RPL36/RPL31/RPL11/SSR2/RPS16/RPL28/RPS26/RPS29/RPS24/RPL41/UBA52/SEC61A2/RPS25/RPL36A/SEC61G/RPLP2/RPS6/RPS13/RPS9/RPL22L1/RPL8/RPL7/RPS3A/RPS11/SEC61B/RPS15/RPL23A/RPL12/RPS27/RPL30/RPS21/RPL10A/RPL13/SEC11A/RPS15A/RPL21/RPL5/RPS17/SRP54/SSR3/RPL3/RPL27/RPL6/RPL3L…
WP_GASTRIC_CANCER_NETWORK_1	WP_GASTRIC_CANCER_NETWORK_1	27	0.802356	2.21299	2.49446e-07	6.55316e-06	4.86584e-06	2520	tags=48%, list=7%, signal=45%	MYBL2/UBE2C/E2F7/TOP2A/CENPF/KIF15/TPX2/AURKA/ECT2/KIF20B/S100P/MCM4/LIN9
REACTOME_RHO_GTPASES_ACTIVATE_PKNS	REACTOME_RHO_GTPASES_ACTIVATE_PKNS	93	0.596923	2.07884	2.55274e-07	6.63713e-06	4.92819e-06	6054	tags=45%, list=18%, signal=37%	H3C2/SFN/H2AC14/H3C3/CDC25C/H2AC4/H2BC14/H2BC7/H2BC17/H2BC8/H4C5/H2BC4/H3C11/H3C7/H3C12/H2BC11/H2AX/H2BC10/H2BC12/H4C9/H3C8/H4C1/H2BC9/H4C4/H2BC6/PKN3/H3C14/H2AC8/H4C8/H2BC13/H2AZ1/H3C1/H4C3/H3C10/YWHAQ/H2AC6/PPP1R14A/H3C4/H2BC15/H2BC5/RHOB/YWHAH
REACTOME_ACTIVATION_OF_ANTERIOR_HOX_GENES_IN_HINDBRAIN_DEVELOPMENT_DURING_EARLY_EMBRYOGENESIS	REACTOME_ACTIVATION_OF_ANTERIOR_HOX_GENES_IN_HINDBRAIN_DEVELOPMENT_DURING_EARLY_EMBRYOGENESIS	121	0.56466	2.02433	2.87853e-07	7.38916e-06	5.48659e-06	6638	tags=40%, list=19%, signal=33%	H3C2/H2AC14/H3C3/H2AC4/H2BC14/EZH2/H2BC7/H2BC17/H2BC8/H4C5/H2BC4/H3C11/H3C7/H3C12/H2BC11/PAX6/H2AX/H2BC10/H2BC12/H4C9/H3C8/H4C1/H2BC9/H4C4/H2BC6/MAFB/H3C14/H2AC8/H4C8/H2BC13/H2AZ1/H3C1/WDR5/H4C3/H3C10/HOXA1/H2AC6/CNOT9/POLR2D/H3C4/HOXB4/HOXD1/PBX1/H2BC15/H2BC5/POLR2G/H2AC19/H2AC18/EED
REACTOME_RUNX1_REGULATES_TRANSCRIPTION_OF_GENES_INVOLVED_IN_DIFFERENTIATION_OF_HSCS	REACTOME_RUNX1_REGULATES_TRANSCRIPTION_OF_GENES_INVOLVED_IN_DIFFERENTIATION_OF_HSCS	129	0.555066	2.01133	2.90058e-07	7.38916e-06	5.48659e-06	6703	tags=40%, list=19%, signal=33%	TP73/H3C2/H2AC14/H3C3/H2AC4/H2BC14/H2BC7/H2BC17/H2BC8/PSMA8/H4C5/H2BC4/H3C11/H3C7/H3C12/H2BC11/H2AX/H2BC10/H2BC12/GATA3/H4C9/H3C8/H4C1/H2BC9/H4C4/H2BC6/PSME4/H3C14/H2AC8/TCF3/H4C8/RPS27A/H2BC13/H2AZ1/H3C1/CBFB/GATA1/H4C3/H3C10/H2AC6/PSMB7/H3C4/PSMB5/PSMD14/H2BC15/H2BC5/PSMD1/UBA52/PSMB9/H2AC19/H2AC18/PSMA4
REACTOME_POLO_LIKE_KINASE_MEDIATED_EVENTS	REACTOME_POLO_LIKE_KINASE_MEDIATED_EVENTS	16	0.883042	2.19922	3.17627e-07	8.01055e-06	5.94798e-06	2689	tags=69%, list=8%, signal=63%	MYBL2/CCNB2/PLK1/CENPF/PKMYT1/FOXM1/CDC25C/CDC25A/CCNB1/LIN9/WEE1
REACTOME_KINESINS	REACTOME_KINESINS	61	0.670553	2.18728	3.33992e-07	8.33989e-06	6.19252e-06	3767	tags=38%, list=11%, signal=34%	KIF2C/KIFC1/KIF20A/KIF18B/KIF4A/KIF23/KIF11/KIF15/RACGAP1/KIF18A/TUBA3C/CENPE/TUBB2B/TUBB6/KIF20B/KIF26A/TUBB2A/TUBB3/TUBB4B/KIF22/KIF1A/KIF4B/KIF26B
REACTOME_EUKARYOTIC_TRANSLATION_ELONGATION	REACTOME_EUKARYOTIC_TRANSLATION_ELONGATION	94	0.59371	2.06786	3.51103e-07	8.68119e-06	6.44594e-06	9543	tags=71%, list=28%, signal=52%	RPL39L/RPS27A/RPLP0/RPL37A/RPS19/RPS7/RPS5/RPS18/RPS3/RPL7A/RPL27A/RPS2/RPL13A/RPL18A/RPS12/RPL35/RPS8/RPL10L/RPL17/RPL18/RPS10/RPL36/RPL31/RPL11/EEF1B2/RPS16/RPL28/RPS26/RPS29/RPS24/RPL41/UBA52/RPS25/RPL36A/RPLP2/EEF1D/RPS6/RPS13/RPS9/EEF2/RPL22L1/RPL8/RPL7/RPS3A/RPS11/RPS15/RPL23A/RPL12/RPS27/RPL30/RPS21/RPL10A/RPL13/RPS15A/RPL21/RPL5/RPS17/RPL3/RPL27/RPL6/EEF1A1/RPL3L/RPL29/RPS28/RPL22/RPL4/RP…
REACTOME_EUKARYOTIC_TRANSLATION_INITIATION	REACTOME_EUKARYOTIC_TRANSLATION_INITIATION	120	0.574438	2.05694	3.5727e-07	8.74792e-06	6.49549e-06	10904	tags=72%, list=32%, signal=49%	RPL39L/EIF4EBP1/RPS27A/RPLP0/EIF2S1/RPL37A/RPS19/RPS7/RPS5/RPS18/RPS3/RPL7A/RPL27A/RPS2/RPL13A/RPL18A/RPS12/RPL35/RPS8/RPL10L/RPL17/RPL18/RPS10/RPL36/RPL31/RPL11/RPS16/RPL28/RPS26/RPS29/RPS24/RPL41/UBA52/RPS25/RPL36A/RPLP2/EIF3J/RPS6/RPS13/RPS9/EIF3M/RPL22L1/PABPC1/RPL8/RPL7/RPS3A/RPS11/RPS15/EIF3F/RPL23A/RPL12/RPS27/RPL30/RPS21/RPL10A/RPL13/RPS15A/RPL21/RPL5/RPS17/RPL3/RPL27/EIF3L/RPL6/RPL3L/RPL…
REACTOME_FORMATION_OF_THE_BETA_CATENIN_TCF_TRANSACTIVATING_COMPLEX	REACTOME_FORMATION_OF_THE_BETA_CATENIN_TCF_TRANSACTIVATING_COMPLEX	91	0.603591	2.08247	4.31645e-07	1.04674e-05	7.77223e-06	5954	tags=44%, list=17%, signal=36%	TERT/H3C2/H2AC14/H3C3/H2AC4/H2BC14/H2BC7/H2BC17/H2BC8/H4C5/H2BC4/H3C11/H3C7/H3C12/H2BC11/H2AX/H2BC10/H2BC12/H4C9/H3C8/H4C1/H2BC9/H4C4/H2BC6/H3C14/H2AC8/MYC/H4C8/H2BC13/H2AZ1/H3C1/TLE1/H4C3/H3C10/H2AC6/TLE4/H3C4/H3-4/H2BC15/H2BC5
REACTOME_G1_S_SPECIFIC_TRANSCRIPTION	REACTOME_G1_S_SPECIFIC_TRANSCRIPTION	29	0.782854	2.19922	4.7743e-07	1.14674e-05	8.51476e-06	4091	tags=59%, list=12%, signal=52%	RRM2/CDC45/TK1/CDK1/ORC1/CDT1/CDC25A/TYMS/CDC6/E2F1/DHFR/CCNE1/FBXO5/LIN9/RBL1/CCNA1/PCNA
REACTOME_HOMOLOGOUS_DNA_PAIRING_AND_STRAND_EXCHANGE	REACTOME_HOMOLOGOUS_DNA_PAIRING_AND_STRAND_EXCHANGE	43	0.716183	2.15924	4.89583e-07	1.16042e-05	8.61631e-06	7448	tags=67%, list=22%, signal=53%	EXO1/RAD51/CHEK1/BRCA2/RAD51AP1/BLM/RMI2/BRCA1/XRCC2/DNA2/BRIP1/BARD1/RFC4/RFC3/RFC2/XRCC3/RFC5/RAD9B/RAD1/RPA2/RAD9A/TOPBP1/RPA3/RBBP8/RAD51C/RMI1/RAD51B/MRE11/RHNO1
PID_MYC_ACTIV_PATHWAY	PID_MYC_ACTIV_PATHWAY	79	0.616704	2.08193	4.92326e-07	1.16042e-05	8.61631e-06	7099	tags=41%, list=21%, signal=32%	LIN28B/CDCA7/TERT/BIRC5/TK1/MMP9/CDC25A/CCNB1/TFRC/BCAT1/FOSL1/HSPD1/RCC1/SLC2A1/MYC/CAD/ENO1/POLR3D/LDHA/HMGA1/EIF2S1/RUVBL2/PEG10/RPL11/ODC1/PTMA/E2F3/TAF9/CDK4/RUVBL1/ACTL6A/BAX
REACTOME_APC_C_MEDIATED_DEGRADATION_OF_CELL_CYCLE_PROTEINS	REACTOME_APC_C_MEDIATED_DEGRADATION_OF_CELL_CYCLE_PROTEINS	88	0.604213	2.07637	5.24064e-07	1.22379e-05	9.08684e-06	3661	tags=23%, list=11%, signal=20%	CDC20/AURKB/UBE2C/NEK2/PLK1/CDK1/CCNA2/BUB1B/PTTG1/CCNB1/AURKA/PSMA8/UBE2S/FBXO5/MAD2L1/CDK2/PSME4/RPS27A/BUB3/CCNA1
WP_CARDIAC_PROGENITOR_DIFFERENTIATION	WP_CARDIAC_PROGENITOR_DIFFERENTIATION	53	0.682742	2.15639	5.37686e-07	1.24408e-05	9.2375e-06	3116	tags=32%, list=9%, signal=29%	FOXA2/ISL1/LIN28B/TBX5/SOX1/MYH6/DKK1/SOX2/TBX20/IRX4/PAX6/TBXT/NODAL/BMP1/GATA4/POU5F1/INS
WP_DNA_DAMAGE_RESPONSE	WP_DNA_DAMAGE_RESPONSE	68	0.646882	2.15172	5.58735e-07	1.28103e-05	9.51186e-06	3068	tags=28%, list=9%, signal=26%	CCNB2/SFN/CDK1/RAD51/CDC25C/CHEK1/CDC25A/CCNB1/BRCA1/FANCD2/CCNE2/E2F1/CCNE1/HUS1B/H2AX/CDK2/TP53AIP1/CHEK2/MYC
REACTOME_COPI_DEPENDENT_GOLGI_TO_ER_RETROGRADE_TRAFFIC	REACTOME_COPI_DEPENDENT_GOLGI_TO_ER_RETROGRADE_TRAFFIC	100	0.582419	2.04913	5.74579e-07	1.30548e-05	9.69346e-06	3767	tags=24%, list=11%, signal=21%	KIF2C/KIFC1/KIF20A/KIF18B/KIF4A/KIF23/KIF11/KIF15/RACGAP1/KIF18A/TUBA3C/CENPE/TUBB2B/TUBB6/KIF20B/KDELR3/KIF26A/TUBB2A/TUBB3/TUBB4B/KIF22/KIF1A/KIF4B/KIF26B
REACTOME_COSTIMULATION_BY_THE_CD28_FAMILY	REACTOME_COSTIMULATION_BY_THE_CD28_FAMILY	72	-0.600594	-2.1269	5.88957e-07	1.3262e-05	9.84731e-06	4055	tags=33%, list=12%, signal=29%	CD86/AKT3/CTLA4/PIK3R1/PAK3/CD3E/CD247/TNFRSF14/CD4/PDCD1/GRAP2/TRBV7-9/TRAV29DV5/TRAV8-4/HLA-DRB1/HLA-DQB2/HLA-DQB1/HLA-DPB1/HLA-DQA1/HLA-DRA/HLA-DPA1/HLA-DQA2/TRBV12-3/HLA-DRB5
PID_E2F_PATHWAY	PID_E2F_PATHWAY	73	0.644055	2.17154	6.0732e-07	1.35545e-05	1.00645e-05	3676	tags=37%, list=11%, signal=33%	TP73/MYBL2/RRM2/TK1/E2F7/E2F2/CDK1/CCNA2/ORC1/CDC25A/TYMS/CDC6/BRCA1/CCNE2/CDKN2A/E2F1/DHFR/CCNE1/MCM3/CDK2/CES3/RBL1/MYC/RRM1/RANBP1/SERPINE1/PLAU
REACTOME_PHASE_II_CONJUGATION_OF_COMPOUNDS	REACTOME_PHASE_II_CONJUGATION_OF_COMPOUNDS	106	-0.539583	-2.02891	8.90613e-07	1.97028e-05	1.46297e-05	5043	tags=31%, list=15%, signal=27%	GSTA5/GSTO2/GSTA1/SLC26A1/MAT1A/GSTK1/MGST2/GSTM5/NAT1/UGT2B4/GLYATL1/UGT2B15/ACSM5/GLYAT/SULT1A2/ABHD14B/ACSM2A/SULT1E1/SULT1C2/UGT1A6/ACSM2B/GSTM1/GSTA2/UGT2B17/UGT2B11/HPGDS/UGT1A8/UGT1A9/UGT2A3/UGT2B28/GGT6/UGT1A1/UGT1A7
REACTOME_ASPIRIN_ADME	REACTOME_ASPIRIN_ADME	42	-0.696453	-2.2148	9.83409e-07	2.15368e-05	1.59915e-05	3531	tags=52%, list=10%, signal=47%	UGT2B4/GLYATL1/BSG/UGT2B15/ACSM5/GLYAT/ACSM2A/SLCO2B1/CYP2C8/UGT1A6/ACSM2B/ALB/UGT2B17/UGT2B11/UGT1A8/UGT1A9/UGT2A3/UGT2B28/CES1/UGT1A1/UGT1A7/CYP3A4
REACTOME_SIGNALING_BY_NOTCH	REACTOME_SIGNALING_BY_NOTCH	242	0.465556	1.813	9.90589e-07	2.15368e-05	1.59915e-05	8056	tags=38%, list=23%, signal=29%	H3C2/DLGAP5/H2AC14/H3C3/H2AC4/TACC3/H2BC14/H2BC7/H2BC17/H2BC8/H4C5/H2BC4/H3C11/ATP2A1/H3C7/E2F1/H3C12/H2BC11/FCER2/H2AX/H2BC10/H2BC12/H4C9/H3C8/JAG1/H4C1/HEY2/H2BC9/H4C4/H2BC6/H3C14/H2AC8/MYC/YBX1/H4C8/RPS27A/ST3GAL4/H2BC13/WWC1/H2AZ1/H3C1/ST3GAL3/DLL1/NEURL1B/TLE1/GZMB/AGO2/CDK8/HES1/H4C3/H3C10/H2AC6/STAT1/TFDP1/PSMB7/TLE4/H3C4/HES5/PSMB5/AGO1/PSEN2/PBX1/PSMD14/H2BC15/H2BC5/PSMD1/B4GALT1/UBA52/N…
REACTOME_ACTIVATED_PKN1_STIMULATES_TRANSCRIPTION_OF_AR_ANDROGEN_RECEPTOR_REGULATED_GENES_KLK2_AND_KLK3	REACTOME_ACTIVATED_PKN1_STIMULATES_TRANSCRIPTION_OF_AR_ANDROGEN_RECEPTOR_REGULATED_GENES_KLK2_AND_KLK3	66	0.641248	2.13199	1.02303e-06	2.20521e-05	1.63741e-05	3543	tags=44%, list=10%, signal=39%	H3C2/H2AC14/H3C3/H2AC4/H2BC14/H2BC7/H2BC17/H2BC8/H4C5/H2BC4/H3C11/H3C7/H3C12/H2BC11/H2AX/H2BC10/H2BC12/H4C9/H3C8/H4C1/H2BC9/H4C4/H2BC6/H3C14/H2AC8/H4C8/H2BC13/H2AZ1/H3C1
REACTOME_RECRUITMENT_OF_NUMA_TO_MITOTIC_CENTROSOMES	REACTOME_RECRUITMENT_OF_NUMA_TO_MITOTIC_CENTROSOMES	95	0.57889	2.019	1.26746e-06	2.70892e-05	2.01142e-05	7732	tags=44%, list=22%, signal=34%	NEK2/PLK1/CDK1/TUBA3C/TUBB2B/TUBB6/PLK4/HAUS8/TUBB2A/TUBB3/TUBB4B/CEP152/TUBB/CEP72/NDE1/ODF2/CENPJ/HAUS7/HAUS1/CEP164/TUBA1B/PPP2R1A/TUBB1/CEP57/MZT1/CNTRL/TUBA1C/TUBA8/DCTN2/HAUS2/CSNK1E/DCTN3/CEP76/TUBA3D/HAUS6/PCNT/CEP131/CDK5RAP2/MAPRE1/TUBG1/HAUS5/TUBB8
REACTOME_PRE_NOTCH_EXPRESSION_AND_PROCESSING	REACTOME_PRE_NOTCH_EXPRESSION_AND_PROCESSING	115	0.558648	1.99451	1.29637e-06	2.74743e-05	2.04002e-05	6590	tags=41%, list=19%, signal=33%	H3C2/H2AC14/H3C3/H2AC4/H2BC14/H2BC7/H2BC17/H2BC8/H4C5/H2BC4/H3C11/ATP2A1/H3C7/E2F1/H3C12/H2BC11/H2AX/H2BC10/H2BC12/H4C9/H3C8/H4C1/H2BC9/H4C4/H2BC6/H3C14/H2AC8/H4C8/ST3GAL4/H2BC13/H2AZ1/H3C1/ST3GAL3/AGO2/H4C3/H3C10/H2AC6/TFDP1/H3C4/AGO1/H2BC15/H2BC5/B4GALT1/NOTCH3/H2AC19/E2F3/H2AC18
WP_GLUCURONIDATION	WP_GLUCURONIDATION	24	-0.794743	-2.2108	1.411e-06	2.96545e-05	2.2019e-05	1619	tags=46%, list=5%, signal=44%	UGT2B4/UGT2B15/UGT1A6/UGT2B17/UGT2B11/UGT1A8/UGT1A9/UGT2A3/UGT2B28/UGT1A1/UGT1A7
REACTOME_DISEASES_OF_DNA_REPAIR	REACTOME_DISEASES_OF_DNA_REPAIR	51	0.670708	2.09731	1.53777e-06	3.20518e-05	2.3799e-05	7636	tags=61%, list=22%, signal=47%	EXO1/RAD51/NEIL3/BRCA2/RAD51AP1/BLM/RMI2/BRCA1/XRCC2/DNA2/BRIP1/BARD1/RFC4/RFC3/RFC2/MSH2/RFC5/RAD9B/MSH6/RAD1/RPA2/RAD9A/TOPBP1/RPA3/RBBP8/RAD51C/RMI1/RAD51B/MRE11/RHNO1/MUTYH
REACTOME_GLUCURONIDATION	REACTOME_GLUCURONIDATION	23	-0.790801	-2.16433	1.61933e-06	3.32029e-05	2.46538e-05	1619	tags=48%, list=5%, signal=46%	UGT2B4/UGT2B15/UGT1A6/UGT2B17/UGT2B11/UGT1A8/UGT1A9/UGT2A3/UGT2B28/UGT1A1/UGT1A7
REACTOME_SWITCHING_OF_ORIGINS_TO_A_POST_REPLICATIVE_STATE	REACTOME_SWITCHING_OF_ORIGINS_TO_A_POST_REPLICATIVE_STATE	92	0.57657	2.00031	1.61368e-06	3.32029e-05	2.46538e-05	8037	tags=41%, list=23%, signal=32%	UBE2C/CCNA2/ORC1/CDT1/CDC6/PSMA8/UBE2S/MCM5/MCM6/CCNE2/ORC6/GMNN/MCM7/CCNE1/MCM2/MCM4/MCM3/CDK2/PSME4/RPS27A/CCNA1/MCM8/SKP2/PSMB7/PSMB5/PSMD14/PSMD1/UBA52/PSMB9/PSMA4/CDC26/PSMA5/PSMC1/PSMC3/PSMD11/PSMA6/PSMB2/PSMA1
REACTOME_HATS_ACETYLATE_HISTONES	REACTOME_HATS_ACETYLATE_HISTONES	140	0.533379	1.96218	1.78489e-06	3.63024e-05	2.69552e-05	7379	tags=38%, list=21%, signal=30%	H3C2/H2AC14/H2AC12/H3C3/H2AC4/H2BC14/H2BC7/H2BC17/H2BC8/H4C5/H2BC4/H3C11/H2AC17/H3C7/H3C12/H2BC11/H2BC10/H2AC16/H2BC12/H4C9/H3C8/H4C1/H2BC9/H2AC21/H4C4/H2BC6/H3C14/H2AC8/HAT1/H4C8/H2BC13/H3C1/WDR5/RUVBL2/YEATS4/H4C3/H3C10/H2AC13/H2AC6/H3C4/ELP1/H2BC15/H2BC5/H2BC18/H2AC19/H2AC18/TAF9/DR1/RUVBL1/ACTL6A/ING5/YEATS2/BRPF3
REACTOME_RMTS_METHYLATE_HISTONE_ARGININES	REACTOME_RMTS_METHYLATE_HISTONE_ARGININES	77	0.601974	2.03667	1.80389e-06	3.63953e-05	2.70242e-05	5362	tags=40%, list=16%, signal=34%	H3C2/H2AC14/H2AC12/H3C3/H2AC4/H4C5/H3C11/H2AC17/H3C7/H3C12/H2AX/H2AC16/H4C9/DNMT3A/H3C8/H4C1/H2AC21/H4C4/H3C14/H2AC8/H4C8/H2AZ1/H3C1/WDR5/RPS2/H4C3/H3C10/H2AC13/H2AC6/WDR77/H3C4
WP_GASTRIC_CANCER_NETWORK_2	WP_GASTRIC_CANCER_NETWORK_2	31	0.750686	2.13807	1.86395e-06	3.73086e-05	2.77023e-05	3423	tags=45%, list=10%, signal=41%	UBE2C/TOP2A/UBE2T/ATAD2/FANCI/DSCC1/CHTF18/LMNB2/RFC4/COL9A1/RFC3/MYC/LBR/SNURF
WP_DNA_IRDOUBLE_STRAND_BREAKS_AND_CELLULAR_RESPONSE_VIA_ATM	WP_DNA_IRDOUBLE_STRAND_BREAKS_AND_CELLULAR_RESPONSE_VIA_ATM	55	0.665614	2.11858	1.96947e-06	3.91103e-05	2.90402e-05	8003	tags=53%, list=23%, signal=41%	TP73/EXO1/RAD51/CDC25C/CHEK1/BRCA2/BLM/BRCA1/FANCD2/CDKN2A/E2F1/H2AX/CHEK2/PCNA/DCLRE1C/BAK1/RAD9A/CASP9/TRIM28/RASSF1/CASP3/APAF1/MDC1/ACTL6A/BAX/PRKDC/MRE11/SMC1A/RIF1
WP_MESODERMAL_COMMITMENT_PATHWAY	WP_MESODERMAL_COMMITMENT_PATHWAY	149	0.523212	1.93479	2.07361e-06	4.08565e-05	3.03367e-05	4455	tags=24%, list=13%, signal=21%	FOXA2/HMGA2/PITX2/TBX1/BMP7/ZIC5/DKK1/LEFTY2/AMH/MSGN1/SOX2/SOX21/FOXA1/ZIC2/LEFTY1/TRIM71/HES7/PAX6/WDHD1/GATA3/FZD8/FOXC2/TET1/NCAPG2/NODAL/ADAM19/ARL4A/POU5F1/WNT3/KLF5/DLL1/FGF8/FZD4/NOG/MTF2/ATP8B2
REACTOME_REGULATION_OF_EXPRESSION_OF_SLITS_AND_ROBOS	REACTOME_REGULATION_OF_EXPRESSION_OF_SLITS_AND_ROBOS	172	0.500782	1.89572	2.11902e-06	4.14276e-05	3.07608e-05	9543	tags=53%, list=28%, signal=39%	ISL1/LHX2/LHX3/ROBO2/PSMA8/RPL39L/PSME4/RPS27A/RPLP0/RPL37A/RPS19/RPS7/RPS5/RPS18/RPS3/RPL7A/RPL27A/RPS2/RPL13A/RPL18A/RPS12/RPL35/RPS8/LHX9/RPL10L/RPL17/PSMB7/RPL18/RPS10/EIF4A3/RPL36/PSMB5/NCBP1/RPL31/RPL11/RPS16/PSMD14/RPL28/RPS26/RPS29/PSMD1/RPS24/RPL41/UBA52/RPS25/RPL36A/PSMB9/RPLP2/RPS6/PSMA4/RPS13/RPS9/RPL22L1/PABPC1/RPL8/RPL7/RPS3A/PSMA5/RPS11/PSMC1/RPS15/HOXA2/PSMC3/RPL23A/PSMD11/RPL12/R…
REACTOME_GOLGI_TO_ER_RETROGRADE_TRANSPORT	REACTOME_GOLGI_TO_ER_RETROGRADE_TRANSPORT	134	0.524708	1.91202	2.1998e-06	4.2676e-05	3.16878e-05	6743	tags=29%, list=20%, signal=23%	KIF2C/KIFC1/KIF20A/KIF18B/KIF4A/KIF23/KIF11/KIF15/RACGAP1/KIF18A/TUBA3C/CENPE/TUBB2B/TUBB6/KIF20B/KDELR3/KIF26A/TUBB2A/TUBB3/TUBB4B/BICD1/KIF22/GALNT2/KIF1A/KIF4B/KIF26B/TUBA1B/TUBB1/TUBA1C/TUBA8/KIF1B/DCTN2/SURF4/PLA2G4A/PAFAH1B3/DCTN3/TUBA3D/KLC1/KIF3C
REACTOME_RESPONSE_OF_EIF2AK4_GCN2_TO_AMINO_ACID_DEFICIENCY	REACTOME_RESPONSE_OF_EIF2AK4_GCN2_TO_AMINO_ACID_DEFICIENCY	102	0.561469	1.98893	2.45279e-06	4.72209e-05	3.50624e-05	10875	tags=75%, list=32%, signal=51%	RPL39L/RPS27A/RPLP0/EIF2S1/RPL37A/RPS19/RPS7/RPS5/RPS18/RPS3/RPL7A/RPL27A/RPS2/RPL13A/RPL18A/RPS12/RPL35/RPS8/RPL10L/RPL17/RPL18/RPS10/ATF3/RPL36/RPL31/RPL11/RPS16/RPL28/RPS26/RPS29/RPS24/RPL41/UBA52/RPS25/RPL36A/RPLP2/TRIB3/RPS6/RPS13/RPS9/RPL22L1/GCN1/RPL8/RPL7/RPS3A/RPS11/RPS15/RPL23A/RPL12/RPS27/RPL30/RPS21/RPL10A/RPL13/RPS15A/RPL21/RPL5/RPS17/RPL3/RPL27/RPL6/RPL3L/RPL29/RPS28/RPL22/RPL4/RPL3…
REACTOME_CHROMATIN_MODIFYING_ENZYMES	REACTOME_CHROMATIN_MODIFYING_ENZYMES	272	0.441597	1.73651	2.82809e-06	5.40337e-05	4.0121e-05	6721	tags=27%, list=20%, signal=22%	H3C2/H2AC14/H2AC12/H3C3/H2AC4/H2BC14/EZH2/H2BC7/H2BC17/H2BC8/H4C5/H2BC4/H3C11/H2AC17/H3C7/H3C12/H2BC11/H2AX/H2BC10/H2AC16/H2BC12/H4C9/DNMT3A/H3C8/DOT1L/H4C1/H2BC9/H2AC21/H4C4/KMT5C/H2BC6/SUV39H2/H3C14/SMYD2/H2AC8/HAT1/H4C8/H2BC13/H2AZ1/H3C1/WDR5/NSD2/RUVBL2/SUV39H1/RPS2/YEATS4/H4C3/H3C10/MBD3/H2AC13/H2AC6/WDR77/KMT5A/H3C4/KDM4B/JMJD6/EHMT1/ELP1/H2BC15/RCOR1/H2BC5/H2BC18/PRDM9/KDM5B/H2AC19/PRMT5/H…
REACTOME_INCRETIN_SYNTHESIS_SECRETION_AND_INACTIVATION	REACTOME_INCRETIN_SYNTHESIS_SECRETION_AND_INACTIVATION	24	0.793989	2.14517	3.33687e-06	6.32751e-05	4.69829e-05	1433	tags=38%, list=4%, signal=36%	ISL1/GIP/FFAR1/GNG13/GCG/GNAT3/GNB3/LEP/PAX6
REACTOME_RESOLUTION_OF_D_LOOP_STRUCTURES	REACTOME_RESOLUTION_OF_D_LOOP_STRUCTURES	35	0.730906	2.13873	3.43054e-06	6.45658e-05	4.79413e-05	3129	tags=40%, list=9%, signal=36%	EXO1/RAD51/EME1/BRCA2/RAD51AP1/BLM/RMI2/BRCA1/XRCC2/DNA2/BRIP1/BARD1/XRCC3/GEN1
REACTOME_TP53_REGULATES_TRANSCRIPTION_OF_CELL_CYCLE_GENES	REACTOME_TP53_REGULATES_TRANSCRIPTION_OF_CELL_CYCLE_GENES	49	0.680051	2.1261	3.72778e-06	6.96404e-05	5.17093e-05	5139	tags=41%, list=15%, signal=35%	SFN/E2F7/CDK1/CCNA2/CDC25C/CCNB1/AURKA/E2F8/CCNE2/E2F1/CCNE1/CDK2/RBL1/PLK2/CCNA1/CENPJ/PCNA/BTG2/TFDP1/CNOT9
PID_AURORA_A_PATHWAY	PID_AURORA_A_PATHWAY	31	0.740405	2.10879	3.93208e-06	7.23899e-05	5.37509e-05	2935	tags=32%, list=9%, signal=30%	BIRC5/CENPA/AURKB/DLGAP5/TPX2/AURKA/TACC3/BRCA1/CDC25B/RAN
REACTOME_TRANSCRIPTIONAL_REGULATION_OF_GRANULOPOIESIS	REACTOME_TRANSCRIPTIONAL_REGULATION_OF_GRANULOPOIESIS	89	0.58018	2.00812	3.93236e-06	7.23899e-05	5.37509e-05	3543	tags=38%, list=10%, signal=34%	H3C2/H2AC14/H3C3/H2AC4/H2BC14/H2BC7/H2BC17/H2BC8/H4C5/H2BC4/H3C11/H3C7/E2F1/H3C12/H2BC11/H2AX/H2BC10/H2BC12/H4C9/H3C8/H4C1/CDK2/H2BC9/H4C4/H2BC6/H3C14/H2AC8/MYC/H4C8/DEK/KLF5/H2BC13/H2AZ1/H3C1
REACTOME_COLLAGEN_BIOSYNTHESIS_AND_MODIFYING_ENZYMES	REACTOME_COLLAGEN_BIOSYNTHESIS_AND_MODIFYING_ENZYMES	67	0.618801	2.06095	4.02764e-06	7.36065e-05	5.46542e-05	3598	tags=46%, list=10%, signal=42%	COL2A1/COL22A1/COL20A1/COL11A1/COL5A3/COL5A1/COL3A1/COL5A2/COL13A1/COL6A3/P4HA3/ADAMTS2/COL4A2/ADAMTS14/P3H3/COL8A1/COL7A1/COL4A1/PCOLCE/COL1A2/BMP1/P3H1/COL9A1/SERPINH1/COLGALT1/COL6A2/PLOD1/COL1A1/COL23A1/COL24A1/COL11A2
KEGG_PENTOSE_AND_GLUCURONATE_INTERCONVERSIONS	KEGG_PENTOSE_AND_GLUCURONATE_INTERCONVERSIONS	27	-0.749985	-2.15641	4.4189e-06	7.94775e-05	5.90135e-05	3531	tags=48%, list=10%, signal=43%	XYLB/UGT2B4/AKR1B1/UGT2B15/UGT1A6/UGT2B17/UGT2B11/UGT1A8/UGT1A9/UGT2A3/UGT2B28/UGT1A1/UGT1A7
REACTOME_G0_AND_EARLY_G1	REACTOME_G0_AND_EARLY_G1	27	0.773741	2.13406	4.44343e-06	7.94775e-05	5.90135e-05	4091	tags=56%, list=12%, signal=49%	MYBL2/TOP2A/CDK1/CCNA2/CDC25A/CDC6/CCNE2/E2F1/CCNE1/CDK2/LIN9/RBL1/MYC/CCNA1/PCNA
NABA_CORE_MATRISOME	NABA_CORE_MATRISOME	275	0.440921	1.73599	4.39568e-06	7.94775e-05	5.90135e-05	3935	tags=31%, list=11%, signal=28%	COL2A1/LAMA1/TNC/IBSP/ACAN/ZPLD1/COL22A1/CILP2/VIT/COL20A1/COL11A1/ELN/COL5A3/CILP/IGFBPL1/NCAN/NID2/COMP/COL5A1/COL3A1/MATN3/TINAG/COL5A2/COL13A1/COL6A3/LAMA4/ELSPBP1/MFAP2/NTNG1/COL4A2/LUM/FGL1/FN1/FBN2/EMILIN1/TNFAIP6/MEPE/DCN/COL8A1/COL7A1/PODNL1/COL4A1/PCOLCE/PXDN/DMBT1/LTBP2/COL1A2/THBS4/PXDNL/SPARC/VWCE/FNDC8/MFAP5/OIT3/LRG1/TSPEAR/COL9A1/CCN4/NTNG2/RELN/RSPO1/ZP4/LTBP1/NTN5/COCH/RSPO2/MXR…
REACTOME_REGULATION_OF_PLK1_ACTIVITY_AT_G2_M_TRANSITION	REACTOME_REGULATION_OF_PLK1_ACTIVITY_AT_G2_M_TRANSITION	87	0.588197	2.02014	4.53302e-06	8.05091e-05	5.97795e-05	7706	tags=43%, list=22%, signal=33%	CCNB2/NEK2/PLK1/CDK1/CCNB1/AURKA/PLK4/HAUS8/TUBB4B/CEP152/TUBB/CEP72/BORA/NDE1/ODF2/RPS27A/CENPJ/HAUS7/HAUS1/CEP164/PPP2R1A/CEP57/CNTRL/DCTN2/UBA52/HAUS2/CSNK1E/DCTN3/CEP76/HAUS6/PCNT/CEP131/CDK5RAP2/MAPRE1/TUBG1/HAUS5/RAB8A
REACTOME_PROCESSING_OF_CAPPED_INTRON_CONTAINING_PRE_MRNA	REACTOME_PROCESSING_OF_CAPPED_INTRON_CONTAINING_PRE_MRNA	244	0.456664	1.78192	4.95753e-06	8.74328e-05	6.49205e-05	12817	tags=65%, list=37%, signal=41%	DDX39A/PPIL1/NUP188/YBX1/ALYREF/NDC1/SNRPA1/LSM4/NUP107/PHF5A/NUP62/SARNP/NUP85/SUGP1/POLR2D/SNRPD1/EIF4A3/PRPF4/NUP155/LSM2/SYMPK/NCBP1/PRPF38A/THOC3/SNRPG/HNRNPA1/SNRPE/PRCC/LSM7/CSTF3/PPIH/POLR2G/SNRNP40/PRPF40A/SF3B4/SNRPA/SF3B6/SNRNP27/HNRNPR/POLR2L/GLE1/SNRPC/THOC5/CPSF1/SNRNP70/HNRNPA3/CPSF3/NUP35/SNRPD2/HNRNPL/SMNDC1/NUP160/SRSF7/DNAJC8/U2AF1/NUP58/NUP93/SF3A2/SRSF3/NUDT21/HNRNPM/POLR2H/D…
WP_CYTOPLASMIC_RIBOSOMAL_PROTEINS	WP_CYTOPLASMIC_RIBOSOMAL_PROTEINS	88	0.576561	1.98135	5.08922e-06	8.9132e-05	6.61822e-05	10875	tags=77%, list=32%, signal=53%	RPS27A/RPLP0/RPL37A/RPS19/RPS7/RPS5/RPS18/RPS3/RPL7A/RPL27A/RPS2/RPL13A/RPL18A/RPS12/RPL35/RPS8/RPL17/RPL18/RPS10/RPL36/RPL31/RPL11/RPS16/RPL28/RPS26/RPS29/RPS24/RPL41/UBA52/RPS25/RPL36A/RPLP2/RPS6KB2/RPS6/RPS13/RPS9/RPL8/RPL7/RPS3A/RPS11/RPS15/RPL23A/RPL12/RPS27/RPL30/RPS21/RPL10A/RPL13/RPS15A/RPL21/RPL5/RPS17/RPL3/RPL27/RPL6/RPL3L/RPL29/RPS28/RPL22/RPL4/RPLP1/RPL37/RPSA/RPS6KA1/MRPL19/RPL35A/RP…
REACTOME_COLLAGEN_DEGRADATION	REACTOME_COLLAGEN_DEGRADATION	64	0.629132	2.07997	5.41878e-06	9.42494e-05	6.99819e-05	3598	tags=45%, list=10%, signal=41%	COL2A1/MMP10/MMP12/MMP13/MMP1/COL11A1/MMP9/MMP7/MMP14/COL5A3/COL5A1/COL3A1/COL5A2/COL13A1/COL6A3/MMP20/COL4A2/MMP8/COL8A1/COL7A1/COL4A1/COL1A2/ELANE/COL9A1/COL6A2/MMP15/COL1A1/COL23A1/COL11A2
KEGG_TYROSINE_METABOLISM	KEGG_TYROSINE_METABOLISM	42	-0.67068	-2.13284	6.54524e-06	0.000113062	8.39508e-05	2916	tags=40%, list=8%, signal=37%	TAT/DBH/ALDH3B1/ALDH3A1/AOX1/ADH7/DDC/MAOA/DCT/MAOB/ALDH3B2/ADH6/TYR/ADH1A/ADH4/ADH1B/ADH1C
REACTOME_COLLAGEN_FORMATION	REACTOME_COLLAGEN_FORMATION	90	0.569933	1.96858	7.32222e-06	0.000125623	9.32777e-05	3598	tags=42%, list=10%, signal=38%	COL2A1/MMP13/COL22A1/COL20A1/COL11A1/CTSV/MMP9/MMP7/COL5A3/COL5A1/COL3A1/COL5A2/COL13A1/COL6A3/P4HA3/ADAMTS2/MMP20/COL4A2/ADAMTS14/P3H3/COL8A1/COL7A1/COL4A1/PCOLCE/PXDN/COL1A2/BMP1/P3H1/COL9A1/SERPINH1/LOXL2/COLGALT1/COL6A2/PLOD1/COL1A1/COL23A1/COL24A1/COL11A2
WP_MRNA_PROCESSING	WP_MRNA_PROCESSING	125	0.522661	1.88694	7.8731e-06	0.000134162	9.96177e-05	13054	tags=78%, list=38%, signal=49%	CELF4/YBX1/SNRPA1/PPM1G/PHF5A/SUGP1/SNRPD1/PRPF4/LSM2/NCBP1/SNRPG/HNRNPA1/SNRPE/LSM7/CSTF3/SNRNP40/PRPF40A/SF3B4/SNRPA/CLK2/DICER1/CLASRP/HNRNPR/SRPK1/CPSF1/SNRNP70/SMC1A/CPSF3/PRMT1/SNRPD2/HNRNPL/SFPQ/RNGTT/SRSF7/SRP54/DNAJC8/U2AF1/SF3A2/SRSF3/NUDT21/HNRNPM/HNRNPD/SRSF2/SNRPF/SF3A3/SRSF9/SUGP2/HNRNPC/PAPOLA/HNRNPA2B1/DHX9/FUS/PTBP2/EFTUD2/PCBP2/DHX16/PABPN1/PTBP1/SNRPB/HNRNPH1/SNRPD3/SF3B3/CPSF4…
REACTOME_AURKA_ACTIVATION_BY_TPX2	REACTOME_AURKA_ACTIVATION_BY_TPX2	72	0.611692	2.05775	8.0613e-06	0.000135537	0.000100639	7352	tags=44%, list=21%, signal=35%	NEK2/PLK1/CDK1/HMMR/TPX2/AURKA/PLK4/HAUS8/TUBB4B/CEP152/TUBB/CEP72/NDE1/ODF2/CENPJ/HAUS7/HAUS1/CEP164/PPP2R1A/CEP57/CNTRL/DCTN2/HAUS2/CSNK1E/DCTN3/CEP76/HAUS6/PCNT/CEP131/CDK5RAP2/MAPRE1/TUBG1
REACTOME_THE_ROLE_OF_GTSE1_IN_G2_M_PROGRESSION_AFTER_G2_CHECKPOINT	REACTOME_THE_ROLE_OF_GTSE1_IN_G2_M_PROGRESSION_AFTER_G2_CHECKPOINT	79	0.583307	1.96918	8.03397e-06	0.000135537	0.000100639	8037	tags=44%, list=23%, signal=34%	CCNB2/PLK1/CDK1/GTSE1/TUBA3C/CCNB1/TUBB2B/PSMA8/TUBB6/TUBB2A/PSME4/TUBB3/TUBB4B/RPS27A/TUBA1B/TUBB1/PSMB7/TUBA1C/PSMB5/TUBA8/PSMD14/PSMD1/UBA52/PSMB9/TUBA3D/PSMA4/MAPRE1/PSMA5/PSMC1/PSMC3/PSMD11/TUBB8/PSMA6/PSMB2/PSMA1
PID_P73PATHWAY	PID_P73PATHWAY	79	0.582781	1.96741	8.38582e-06	0.00014006	0.000103997	4681	tags=30%, list=14%, signal=26%	WT1/TP73/SFN/PLK1/CDK1/RAD51/CCNA2/BUB1/CHEK1/BRCA2/CCNB1/CCNE2/MAPK11/CDK2/FASN/HEY2/TP53AIP1/MYC/SERPINE1/BUB3/IL1RAP/TP53I3/GATA1/NSG1
REACTOME_NONSENSE_MEDIATED_DECAY_NMD	REACTOME_NONSENSE_MEDIATED_DECAY_NMD	116	0.538741	1.92542	8.78442e-06	0.000145752	0.000108224	10875	tags=66%, list=32%, signal=45%	RPL39L/RPS27A/RPLP0/RPL37A/RPS19/RPS7/RPS5/RPS18/RPS3/RPL7A/RPL27A/RPS2/PPP2R1A/RPL13A/RPL18A/RPS12/RPL35/RPS8/RPL10L/RPL17/RPL18/RPS10/EIF4A3/RPL36/NCBP1/RPL31/RPL11/RPS16/RPL28/RPS26/RPS29/RPS24/RPL41/UBA52/RPS25/RPL36A/RPLP2/RPS6/RPS13/RPS9/RPL22L1/PABPC1/RPL8/RPL7/RPS3A/RPS11/RPS15/RPL23A/RPL12/RPS27/RPL30/RPS21/RPL10A/RPL13/RPS15A/RPL21/RPL5/RPS17/RPL3/RPL27/RPL6/RPL3L/MAGOH/RPL29/RPS28/RPL2…
REACTOME_UNWINDING_OF_DNA	REACTOME_UNWINDING_OF_DNA	12	0.893369	2.0399	8.87648e-06	0.000146317	0.000108643	2078	tags=83%, list=6%, signal=78%	CDC45/GINS2/GINS1/GINS4/MCM5/MCM6/MCM7/MCM2/MCM4/MCM3
WP_ENDODERM_DIFFERENTIATION	WP_ENDODERM_DIFFERENTIATION	141	0.494771	1.8216	9.18137e-06	0.00015036	0.000111645	6372	tags=29%, list=19%, signal=24%	FOXA2/LHX1/HOXC11/BMP7/ZIC5/DKK1/EZH2/SOX2/SOX21/FOXA1/GLI2/TRIM71/NKX2-1/WDHD1/CER1/TET1/NCAPG2/SFRP1/NODAL/DUSP5/GATA4/MAD2L2/POU5F1/WNT3/WWC1/PTHLH/NOG/MTF2/ATP8B2/TAF5/HOXA1/TCEAL2/STAT1/LAMC1/TOX/PBX1/DNMT3B/RAB38/JARID2/WNT8A/FOXH1
BIOCARTA_BLYMPHOCYTE_PATHWAY	BIOCARTA_BLYMPHOCYTE_PATHWAY	12	-0.878356	-2.06724	9.38902e-06	0.000152768	0.000113433	3641	tags=83%, list=11%, signal=75%	ITGB2/CD40/FCGR2B/ITGAL/CR1/HLA-DRB1/PTPRC/HLA-DRA/CR2/HLA-DRB5
REACTOME_UB_SPECIFIC_PROCESSING_PROTEASES	REACTOME_UB_SPECIFIC_PROCESSING_PROTEASES	197	0.46569	1.77833	1.08783e-05	0.000175866	0.000130584	7630	tags=30%, list=22%, signal=24%	CDC20/CLSPN/CCNA2/H2AC14/H2AC12/CDC25A/H2AC4/H2BC14/H2BC7/H2BC17/H2BC8/PSMA8/H2BC4/H2AC17/H2BC11/H2BC10/H2AC16/H2BC12/GATA3/H2BC9/USP44/H2AC21/H2BC6/PSME4/TGFBR1/H2AC8/MYC/RPS27A/H2BC13/CCNA1/RCE1/TRAF2/USP18/SKP2/H2AC13/H2AC6/PSMB7/USP37/PSMB5/USP26/PSMD14/H2BC15/H2BC5/H2BC18/PSMD1/UBA52/PSMB9/OTUB1/H2AC19/H2AC18/USP49/PSMA4/RUVBL1/USP15/PSMA5/PSMC1/UFD1/BIRC2/PSMC3/PSMD11
KEGG_ECM_RECEPTOR_INTERACTION	KEGG_ECM_RECEPTOR_INTERACTION	83	0.584927	1.98007	1.19043e-05	0.000191227	0.000141989	4526	tags=37%, list=13%, signal=33%	COL2A1/LAMA1/TNC/IBSP/HMMR/COL11A1/COL5A3/COMP/COL5A1/COL3A1/COL5A2/COL6A3/LAMA4/COL4A2/ITGB3/FN1/GP9/ITGA2B/ITGA7/COL4A1/COL1A2/THBS4/RELN/SDC1/COL6A2/COL1A1/COL11A2/LAMA2/ITGB8/THBS3/GP5
KEGG_P53_SIGNALING_PATHWAY	KEGG_P53_SIGNALING_PATHWAY	68	0.61243	2.03712	1.37138e-05	0.000218899	0.000162537	4290	tags=26%, list=12%, signal=23%	TP73/RRM2/CCNB2/SFN/CDK1/GTSE1/CHEK1/CCNB1/CCNE2/CDKN2A/CCNE1/CDK2/TP53AIP1/CHEK2/SERPINE1/PERP/STEAP3/TP53I3
REACTOME_ESTROGEN_DEPENDENT_GENE_EXPRESSION	REACTOME_ESTROGEN_DEPENDENT_GENE_EXPRESSION	149	0.500476	1.85072	1.43262e-05	0.000227236	0.000168727	5521	tags=31%, list=16%, signal=26%	H3C2/H2AC14/H3C3/H2AC4/H2BC14/H2BC7/H2BC17/H2BC8/FOXA1/H4C5/H2BC4/H3C11/KPNA2/H3C7/H3C12/H2BC11/H2AX/H2BC10/H2BC12/GATA3/H4C9/GREB1/TFF1/H3C8/H4C1/H2BC9/H4C4/H2BC6/H3C14/H2AC8/PGR/MYC/H4C8/H2BC13/H2AZ1/H3C1/CBFB/FOSB/AGO2/H4C3/H3C10/H2AC6/POLR2D/H3C4/KDM4B/AGO1
REACTOME_CHOLESTEROL_BIOSYNTHESIS	REACTOME_CHOLESTEROL_BIOSYNTHESIS	27	0.75764	2.08966	1.46862e-05	0.000231491	0.000171886	3994	tags=59%, list=12%, signal=52%	ACAT2/FDPS/HMGCS1/MVD/SQLE/IDI1/FDFT1/MVK/DHCR7/HSD17B7/HMGCR/SC5D/LBR/NSDHL/CYP51A1/LSS
KEGG_COMPLEMENT_AND_COAGULATION_CASCADES	KEGG_COMPLEMENT_AND_COAGULATION_CASCADES	69	-0.566909	-1.99181	1.63155e-05	0.000255576	0.00018977	5371	tags=46%, list=16%, signal=39%	F13A1/C1R/CFI/F9/C8B/CFD/F8/PROS1/CD55/KLKB1/F7/F10/A2M/C6/C9/PLAT/F3/F11/C5AR1/FGB/SERPINA1/C7/C4B/CR1/C4A/CR2/C4BPA/C3/MASP1/FGG/F2/FGA
REACTOME_ESR_MEDIATED_SIGNALING	REACTOME_ESR_MEDIATED_SIGNALING	220	0.44885	1.73816	1.65331e-05	0.000257386	0.000191114	7739	tags=35%, list=22%, signal=28%	H3C2/H2AC14/H3C3/GNG13/MMP9/MMP7/H2AC4/GNAT3/SPHK1/GNB3/H2BC14/H2BC7/AREG/H2BC17/H2BC8/FOXA1/H4C5/H2BC4/H3C11/KPNA2/H3C7/H3C12/H2BC11/GNG8/H2AX/H2BC10/H2BC12/GATA3/H4C9/GREB1/TFF1/H3C8/H4C1/H2BC9/H4C4/H2BC6/H3C14/H2AC8/PGR/MYC/S1PR3/H4C8/H2BC13/H2AZ1/H3C1/NRAS/CBFB/FOSB/AGO2/H4C3/H3C10/H2AC6/EPGN/POLR2D/GNG4/H3C4/KDM4B/AGO1/GNAI3/H2BC15/H2BC5/POLR2G/XPO1/H2AC19/HRAS/H2AC18/EREG/AGO3/FOS/GNG5/POLR…
KEGG_OOCYTE_MEIOSIS	KEGG_OOCYTE_MEIOSIS	113	0.523037	1.86828	1.68153e-05	0.000260172	0.000193183	3152	tags=26%, list=9%, signal=23%	CDC20/CCNB2/PLK1/SMC1B/PPP3R2/SGO1/CDK1/PKMYT1/BUB1/PTTG1/CDC25C/FBXO43/ESPL1/CCNB1/AURKA/CCNE2/ADCY1/MAPK12/CCNE1/FBXO5/STAG3/MAD2L1/REC8/CDK2/CALML6/MAD2L2/PGR/INS/SPDYC
REACTOME_DNA_DOUBLE_STRAND_BREAK_RESPONSE	REACTOME_DNA_DOUBLE_STRAND_BREAK_RESPONSE	77	0.575427	1.94685	1.78749e-05	0.000274882	0.000204105	6119	tags=40%, list=18%, signal=33%	H2BC14/H2BC7/BRCA1/H2BC17/H2BC8/EYA2/H4C5/H2BC4/KPNA2/EYA1/H2BC11/H2AX/H2BC10/H2BC12/H4C9/BARD1/H4C1/H2BC9/H4C4/H2BC6/CHEK2/H4C8/RPS27A/H2BC13/NSD2/H4C3/KDM4B/H3-4/H2BC15/H2BC5/UBA52
WP_ATM_SIGNALING_PATHWAY	WP_ATM_SIGNALING_PATHWAY	40	0.689423	2.0565	1.82998e-05	0.00027971	0.00020769	2189	tags=30%, list=6%, signal=28%	TP73/CDK1/RAD51/CDC25C/CHEK1/CDC25A/CCNB1/BRCA1/FANCD2/CCNE1/H2AX/CDK2
KEGG_ALLOGRAFT_REJECTION	KEGG_ALLOGRAFT_REJECTION	35	-0.684983	-2.08922	1.8596e-05	0.000280833	0.000208524	6526	tags=69%, list=19%, signal=56%	HLA-G/HLA-C/HLA-F/IL12B/IL2/CD86/FASLG/HLA-E/HLA-B/HLA-A/IL12A/CD40/TNF/HLA-DMA/CD40LG/HLA-DRB1/HLA-DQB1/HLA-DPB1/HLA-DQA1/HLA-DRA/HLA-DPA1/HLA-DQA2/HLA-DOA/HLA-DRB5
REACTOME_MUSCLE_CONTRACTION	REACTOME_MUSCLE_CONTRACTION	203	-0.42458	-1.75384	1.85625e-05	0.000280833	0.000208524	4307	tags=31%, list=13%, signal=27%	MYL2/NPR2/KCNJ4/KCNIP1/PDE5A/HIPK2/SCN10A/KCNE2/MYLK/DMD/SLC8A1/FXYD2/CAMK2D/FXYD6/CACNA1G/SCN2B/ATP1B1/GUCY1A2/CASQ2/ATP1B2/ALDH2/ATP2A3/KCNJ12/ATP2B3/KCNK15/SCN11A/FXYD1/TMOD1/TNNC2/FGF12/KCNK4/MYLPF/FGF11/FGF14/KCNH2/CACNG4/KCNE4/CASQ1/CLIC2/SCN1B/KCNK10/FXYD4/KCND2/CAMK2A/ACTN3/FXYD7/KCNJ11/PLN/TRIM72/MYBPC2/NOS1/DES/KCNQ1/ATP1A4/KCNIP4/CACNG7/LMOD1/TRDN/MYL1/TNNC1/SCN2A/TNNI1/CES1
REACTOME_RESOLUTION_OF_D_LOOP_STRUCTURES_THROUGH_SYNTHESIS_DEPENDENT_STRAND_ANNEALING_SDSA	REACTOME_RESOLUTION_OF_D_LOOP_STRUCTURES_THROUGH_SYNTHESIS_DEPENDENT_STRAND_ANNEALING_SDSA	27	0.748793	2.06525	2.12132e-05	0.000318451	0.000236456	3098	tags=44%, list=9%, signal=40%	EXO1/RAD51/BRCA2/RAD51AP1/BLM/RMI2/BRCA1/XRCC2/DNA2/BRIP1/BARD1/XRCC3
WP_DNA_MISMATCH_REPAIR	WP_DNA_MISMATCH_REPAIR	23	0.769286	2.06427	2.25498e-05	0.000334533	0.000248397	4960	tags=70%, list=14%, signal=60%	EXO1/POLE2/POLD1/LIG1/RFC4/RFC3/RFC2/MSH2/RFC5/POLD3/PCNA/POLE/POLE4/MSH6/RPA2/POLE3
REACTOME_REGULATION_OF_BETA_CELL_DEVELOPMENT	REACTOME_REGULATION_OF_BETA_CELL_DEVELOPMENT	42	0.681885	2.04479	2.25017e-05	0.000334533	0.000248397	3398	tags=36%, list=10%, signal=32%	FOXA2/IAPP/FOXA3/RFX6/NKX2-2/HNF4G/PTF1A/INSM1/ONECUT3/PAX6/SLC2A2/PKLR/INS/NEUROD1/FGF10
REACTOME_ORC1_REMOVAL_FROM_CHROMATIN	REACTOME_ORC1_REMOVAL_FROM_CHROMATIN	71	0.59308	1.98701	2.27386e-05	0.000335361	0.000249011	8037	tags=45%, list=23%, signal=35%	CCNA2/ORC1/CDT1/CDC6/PSMA8/MCM5/MCM6/ORC6/MCM7/MCM2/MCM4/MCM3/CDK2/PSME4/RPS27A/CCNA1/MCM8/SKP2/PSMB7/PSMB5/PSMD14/PSMD1/UBA52/PSMB9/PSMA4/PSMA5/PSMC1/PSMC3/PSMD11/PSMA6/PSMB2/PSMA1
REACTOME_RECOGNITION_AND_ASSOCIATION_OF_DNA_GLYCOSYLASE_WITH_SITE_CONTAINING_AN_AFFECTED_PURINE	REACTOME_RECOGNITION_AND_ASSOCIATION_OF_DNA_GLYCOSYLASE_WITH_SITE_CONTAINING_AN_AFFECTED_PURINE	55	0.632122	2.01198	2.5163e-05	0.000368959	0.000273959	3540	tags=40%, list=10%, signal=36%	H2AC14/NEIL3/H2AC4/H2BC14/H2BC7/H2BC17/H2BC8/H4C5/H2BC4/H2BC11/H2AX/H2BC10/H2BC12/H4C9/H4C1/H2BC9/H4C4/H2BC6/H2AC8/H4C8/H2BC13/H2AZ1
REACTOME_PKMTS_METHYLATE_HISTONE_LYSINES	REACTOME_PKMTS_METHYLATE_HISTONE_LYSINES	71	0.591515	1.98177	2.68409e-05	0.000391288	0.000290538	5642	tags=37%, list=16%, signal=31%	H3C2/H3C3/EZH2/H4C5/H3C11/H3C7/H3C12/H4C9/H3C8/DOT1L/H4C1/H4C4/KMT5C/SUV39H2/H3C14/SMYD2/H4C8/H3C1/WDR5/NSD2/SUV39H1/H4C3/H3C10/KMT5A/H3C4/EHMT1
REACTOME_DEUBIQUITINATION	REACTOME_DEUBIQUITINATION	274	0.415772	1.6365	2.77139e-05	0.000401692	0.000298263	7630	tags=27%, list=22%, signal=21%	CDC20/CLSPN/CDK1/CCNA2/H2AC14/H2AC12/CDC25A/H2AC4/H2BC14/H2BC7/BRCA1/H2BC17/H2BC8/PSMA8/H2BC4/H2AC17/H2BC11/H2BC10/H2AC16/H2BC12/GATA3/BARD1/H2BC9/USP44/H2AC21/H2BC6/PSME4/TGFBR1/H2AC8/TNFAIP3/MYC/RPS27A/H2BC13/CCNA1/RCE1/TRAF2/USP18/SKP2/H2AC13/JOSD1/H2AC6/PSMB7/INO80B/USP37/PSMB5/USP26/PSMD14/H2BC15/H2BC5/H2BC18/NEDD8/UCHL1/PSMD1/UBA52/TNIP3/PSMB9/OTUB1/H2AC19/MBD6/H2AC18/USP49/PSMA4/RUVBL1/TFP…
REACTOME_NUCLEAR_ENVELOPE_NE_REASSEMBLY	REACTOME_NUCLEAR_ENVELOPE_NE_REASSEMBLY	76	0.590666	1.99731	2.81392e-05	0.000405527	0.000301111	5815	tags=37%, list=17%, signal=31%	CCNB2/CDK1/TUBA3C/CCNB1/LMNB1/TUBB2B/TUBB6/TUBB2A/VRK1/TUBB3/RCC1/RAN/TUBB4B/NUP188/LBR/NDC1/TMPO/TUBA1B/NUP107/PPP2R1A/NUP62/TUBB1/NUP85/NUP155/RANGAP1/TUBA1C/TUBA8/KPNB1
KEGG_ASCORBATE_AND_ALDARATE_METABOLISM	KEGG_ASCORBATE_AND_ALDARATE_METABOLISM	24	-0.75333	-2.0956	3.04427e-05	0.00043623	0.000323908	3531	tags=50%, list=10%, signal=45%	UGT2B4/UGT2B15/ALDH2/UGT1A6/UGT2B17/UGT2B11/UGT1A8/UGT1A9/UGT2A3/UGT2B28/UGT1A1/UGT1A7
WP_EXTRAFOLLICULAR_B_CELL_ACTIVATION_BY_SARSCOV2	WP_EXTRAFOLLICULAR_B_CELL_ACTIVATION_BY_SARSCOV2	71	-0.553188	-1.9605	3.13254e-05	0.000446343	0.000331418	5000	tags=42%, list=15%, signal=36%	CD79A/MS4A1/IL2/IRF8/EBI3/BLNK/TNFSF13/TBX21/ITGB2/CD19/IL12A/CD40/CXCL12/STAT5A/PDCD1/NEAT1/TNF/CCL21/TLR7/IRF4/GPR183/SYK/CD40LG/CR1/PTPRC/C4A/CD69/CR2/C3/CCL19
REACTOME_BASE_EXCISION_REPAIR_AP_SITE_FORMATION	REACTOME_BASE_EXCISION_REPAIR_AP_SITE_FORMATION	62	0.600971	1.97412	3.16223e-05	0.000448042	0.000332679	6590	tags=48%, list=19%, signal=39%	H2AC14/NEIL3/H2AC4/H2BC14/H2BC7/H2BC17/H2BC8/H4C5/H2BC4/H2BC11/H2AX/H2BC10/H2BC12/H4C9/H4C1/H2BC9/H4C4/H2BC6/H2AC8/H4C8/H2BC13/H2AZ1/H4C3/H2AC6/H3-4/H2BC15/H2BC5/TDG/H2AC19/H2AC18
REACTOME_FATTY_ACID_METABOLISM	REACTOME_FATTY_ACID_METABOLISM	177	-0.415743	-1.68726	3.3042e-05	0.000465541	0.000345673	4503	tags=25%, list=13%, signal=22%	SCD5/EHHADH/DECR2/HTD2/CYP4F8/NUDT7/ALOX15/CYP4F2/MMAA/CYP2J2/EPHX2/SLC22A5/ACBD4/ALOX5/ACSBG1/TBXAS1/FAAH2/CYP4A11/ELOVL7/ACSM6/CYP2U1/CYP4F22/CYP8B1/ACOT11/ACAD11/CYP2C8/ACOT12/ACOXL/PTGS1/ACADL/AKR1C3/THRSP/ACOX2/MID1IP1/DPEP3/CYP4A22/ACSL6/ALOXE3/HPGDS/CYP4B1/CYP4F11/PON1/SLC27A2/PTGDS/TECRL
REACTOME_CONDENSATION_OF_PROMETAPHASE_CHROMOSOMES	REACTOME_CONDENSATION_OF_PROMETAPHASE_CHROMOSOMES	11	0.866117	1.95842	3.3827e-05	0.000473954	0.000351919	3720	tags=73%, list=11%, signal=65%	CCNB2/NCAPH/CDK1/NCAPG/CCNB1/NCAPD2/SMC2/SMC4
WP_CHOLESTEROL_BIOSYNTHESIS_PATHWAY	WP_CHOLESTEROL_BIOSYNTHESIS_PATHWAY	15	0.842754	2.04813	3.64943e-05	0.000508501	0.000377571	3994	tags=87%, list=12%, signal=77%	FDPS/HMGCS1/MVD/SQLE/IDI1/FDFT1/MVK/DHCR7/HMGCR/SC5D/NSDHL/CYP51A1/LSS
REACTOME_TP53_REGULATES_TRANSCRIPTION_OF_GENES_INVOLVED_IN_G1_CELL_CYCLE_ARREST	REACTOME_TP53_REGULATES_TRANSCRIPTION_OF_GENES_INVOLVED_IN_G1_CELL_CYCLE_ARREST	14	0.83816	2.00673	3.74235e-05	0.000518583	0.000385058	3661	tags=57%, list=11%, signal=51%	E2F7/CCNA2/E2F8/CCNE2/E2F1/CCNE1/CDK2/CCNA1
KEGG_DRUG_METABOLISM_OTHER_ENZYMES	KEGG_DRUG_METABOLISM_OTHER_ENZYMES	50	-0.610108	-1.9892	3.79411e-05	0.000522883	0.00038825	2119	tags=34%, list=6%, signal=32%	UPB1/UPP2/UGT1A6/CYP2A6/DPYS/CYP3A5/UGT2B17/UGT2B11/CYP3A7/UGT1A8/UGT1A9/UGT2A3/UGT2B28/CES1/UGT1A1/UGT1A7/CYP3A4
REACTOME_TCR_SIGNALING	REACTOME_TCR_SIGNALING	122	-0.467062	-1.81187	3.89957e-05	0.000534495	0.000396872	3375	tags=32%, list=10%, signal=29%	CD3G/TRAF6/CD3D/LCK/PSMB10/IKBKB/LAT/NFKBIA/PIK3CB/UBE2D1/ZAP70/PTPN22/LCP2/PIK3R1/WAS/PAK3/CD3E/CD247/INPP5D/CD4/GRAP2/TRBV7-9/TRAV29DV5/TRAV8-4/ITK/HLA-DRB1/PSMB11/FYB1/PTPRC/HLA-DQB2/HLA-DQB1/HLA-DPB1/HLA-DQA1/TRAT1/HLA-DRA/HLA-DPA1/HLA-DQA2/TRBV12-3/HLA-DRB5
REACTOME_HDR_THROUGH_SINGLE_STRAND_ANNEALING_SSA	REACTOME_HDR_THROUGH_SINGLE_STRAND_ANNEALING_SSA	37	0.682398	1.9994	4.08275e-05	0.000556578	0.000413269	7448	tags=59%, list=22%, signal=47%	EXO1/RAD51/BLM/RMI2/BRCA1/DNA2/BRIP1/BARD1/RFC4/RFC3/RFC2/RFC5/RAD9B/RAD1/RPA2/RAD9A/TOPBP1/RPA3/RBBP8/RMI1/MRE11/RHNO1
BIOCARTA_G2_PATHWAY	BIOCARTA_G2_PATHWAY	24	0.757685	2.04709	4.12713e-05	0.000559603	0.000415515	4633	tags=54%, list=13%, signal=47%	PLK1/CDK1/CDC25C/CHEK1/CDC25A/CCNB1/BRCA1/CDC25B/WEE1/CHEK2/CDKN2D/MYT1/YWHAQ
WP_HEART_DEVELOPMENT	WP_HEART_DEVELOPMENT	45	0.661013	2.01255	4.31405e-05	0.000578221	0.00042934	2587	tags=29%, list=8%, signal=27%	FOXA2/ISL1/TBX5/PITX2/TBX1/TBX20/VEGFC/IRX4/HAND2/TBX2/FOXC2/HEY2/GATA4
WP_INTEGRATED_CANCER_PATHWAY	WP_INTEGRATED_CANCER_PATHWAY	44	0.660017	2.00557	4.2946e-05	0.000578221	0.00042934	3068	tags=32%, list=9%, signal=29%	PLK1/MMP1/CDK1/CHEK1/CDC25A/BLM/BRCA1/E2F1/BARD1/CDK2/CDC25B/MSH2/CHEK2/MYC
REACTOME_SUMOYLATION_OF_DNA_REPLICATION_PROTEINS	REACTOME_SUMOYLATION_OF_DNA_REPLICATION_PROTEINS	46	0.643138	1.96866	4.33322e-05	0.000578221	0.00042934	10286	tags=67%, list=30%, signal=47%	BIRC5/AURKB/CDCA8/TOP2A/AURKA/NUP188/NDC1/PCNA/NUP107/NUP62/INCENP/NUP85/NUP155/RANGAP1/SUMO1/NUP35/SUMO2/NUP160/NUP58/NUP93/PIAS4/NUP210/RAE1/SUMO3/NUP205/NUP214/NUP98/TPR/NUP50/NUP153/NUP37
REACTOME_PEPTIDE_HORMONE_BIOSYNTHESIS	REACTOME_PEPTIDE_HORMONE_BIOSYNTHESIS	14	0.834191	1.99723	4.65883e-05	0.000618399	0.000459173	1632	tags=43%, list=5%, signal=41%	LHB/CGA/INHBE/INHBC/INHA/CGB3
REACTOME_RECOGNITION_OF_DNA_DAMAGE_BY_PCNA_CONTAINING_REPLICATION_COMPLEX	REACTOME_RECOGNITION_OF_DNA_DAMAGE_BY_PCNA_CONTAINING_REPLICATION_COMPLEX	30	0.715663	2.01968	4.68388e-05	0.000618469	0.000459224	6119	tags=60%, list=18%, signal=49%	DTL/POLE2/POLD1/RFC4/RFC3/RFC2/USP1/RFC5/RPS27A/POLD3/PCNA/POLE/POLE4/RPA2/POLE3/RAD18/RPA3/UBA52
KEGG_STARCH_AND_SUCROSE_METABOLISM	KEGG_STARCH_AND_SUCROSE_METABOLISM	49	-0.619224	-2.01615	4.73399e-05	0.000621829	0.00046172	1737	tags=29%, list=5%, signal=27%	AMY2B/UGT2B4/UGT2B15/HK2/UGT1A6/UGT2B17/UGT2B11/AMY2A/UGT1A8/UGT1A9/UGT2A3/UGT2B28/UGT1A1/UGT1A7
REACTOME_TRANSLATION	REACTOME_TRANSLATION	293	0.408936	1.61843	4.84193e-05	0.000632713	0.000469801	11015	tags=48%, list=32%, signal=33%	EPRS1/RPL39L/EIF4EBP1/RPS27A/RPLP0/EIF2S1/RPL37A/RPS19/RPS7/RPS5/RPS18/RPS3/RPL7A/RPL27A/RPS2/RPL13A/RPL18A/RPS12/MRPL14/RPL35/RPS8/RPL10L/RPL17/WARS1/TARS1/RPL18/SRPRB/RPS10/RPL36/RPL31/RPL11/SSR2/EEF1B2/RPS16/RPL28/RPS26/FARSB/RPS29/RPS24/RPL41/UBA52/SEC61A2/RPS25/RPL36A/SEC61G/MRPL37/RPLP2/EEF1D/MRPL41/DAP3/EIF3J/RPS6/RPS13/RPS9/EEF2/EIF3M/IARS1/RPL22L1/MARS1/PABPC1/RPL8/RPL7/RPS3A/AARS2/RPS11…
WP_ALLOGRAFT_REJECTION	WP_ALLOGRAFT_REJECTION	89	-0.503874	-1.84625	4.8695e-05	0.000633035	0.00047004	5440	tags=44%, list=16%, signal=37%	AGTR1/IL12B/PDGFRA/C8B/IL2/IL1A/CD86/FASLG/HLA-E/CD55/HLA-B/CTLA4/FOXP3/HLA-A/IL12A/CD40/C6/C9/CXCL12/C7/TNF/CCL21/HLA-DMA/CD40LG/C4B/HLA-DRB1/IL1B/C4A/HLA-DQB1/HLA-DPB1/HLA-DQA1/HLA-DRA/HLA-DPA1/HLA-DQA2/BHMT2/HLA-DOA/HLA-DRB5/C3/CCL19
WP_TYROBP_CAUSAL_NETWORK_IN_MICROGLIA	WP_TYROBP_CAUSAL_NETWORK_IN_MICROGLIA	60	-0.581713	-1.98644	4.90346e-05	0.000634181	0.000470891	6891	tags=55%, list=20%, signal=44%	GAL3ST4/GIMAP2/GPX1/ITGAX/NRROS/RBM47/CXCL16/CREB3L2/LYL1/HCLS1/ADAP2/SAMSN1/CD37/ITGB2/RGS1/TYROBP/IGSF6/TMEM106A/CD84/BIN2/NCKAP1L/RNASE6/TCIRG1/IL18/STAT5A/CD4/IL10RA/ITGAM/CYTL1/APBB1IP/LGALS9C/GAPT/C3
KEGG_GRAFT_VERSUS_HOST_DISEASE	KEGG_GRAFT_VERSUS_HOST_DISEASE	37	-0.658154	-2.02727	5.06806e-05	0.000652125	0.000484215	4674	tags=62%, list=14%, signal=54%	IL2/IL1A/CD86/FASLG/HLA-E/HLA-B/KIR2DL1/KLRD1/HLA-A/KIR3DL1/TNF/KIR3DL2/HLA-DMA/HLA-DRB1/IL1B/HLA-DQB1/HLA-DPB1/HLA-DQA1/HLA-DRA/HLA-DPA1/HLA-DQA2/HLA-DOA/HLA-DRB5
REACTOME_RESOLUTION_OF_AP_SITES_VIA_THE_MULTIPLE_NUCLEOTIDE_PATCH_REPLACEMENT_PATHWAY	REACTOME_RESOLUTION_OF_AP_SITES_VIA_THE_MULTIPLE_NUCLEOTIDE_PATCH_REPLACEMENT_PATHWAY	25	0.735494	2.00221	5.11212e-05	0.000654455	0.000485945	4960	tags=60%, list=14%, signal=51%	POLE2/FEN1/POLD1/LIG1/RFC4/RFC3/RFC2/RFC5/POLD3/PCNA/POLE/POLE4/PARP2/RPA2/POLE3
BIOCARTA_CELLCYCLE_PATHWAY	BIOCARTA_CELLCYCLE_PATHWAY	23	0.75824	2.03463	5.24168e-05	0.000667653	0.000495744	5106	tags=52%, list=15%, signal=44%	CDK1/CDC25A/CCNB1/CDKN2A/E2F1/CCNE1/CDK2/RBL1/CDKN2D/CCNA1/CDKN2C/TFDP1
WP_FATTY_ACID_OMEGAOXIDATION	WP_FATTY_ACID_OMEGAOXIDATION	15	-0.815626	-2.02953	5.53615e-05	0.000701616	0.000520963	2719	tags=73%, list=8%, signal=68%	ALDH2/CYP4A11/ADH7/CYP2A6/ALDH1A1/ADH6/ADH1A/ADH4/ADH1B/CYP3A4/ADH1C
REACTOME_GOLGI_CISTERNAE_PERICENTRIOLAR_STACK_REORGANIZATION	REACTOME_GOLGI_CISTERNAE_PERICENTRIOLAR_STACK_REORGANIZATION	14	0.830429	1.98822	5.78199e-05	0.000729109	0.000541377	588	tags=29%, list=2%, signal=28%	CCNB2/PLK1/CDK1/CCNB1
REACTOME_DRUG_ADME	REACTOME_DRUG_ADME	95	-0.500126	-1.85174	5.99519e-05	0.000752233	0.000558547	3961	tags=35%, list=12%, signal=31%	SLCO1B3/NAT1/UGT2B4/GLYATL1/BSG/UGT2B15/ACSM5/GLYAT/ACSM2A/SULT1E1/SLCO2B1/SLC28A2/CYP2C8/UGT1A6/ACSM2B/SLC29A1/ALB/GSTM1/GSTA2/UGT2B17/UGT2B11/ABCG2/UGT1A8/UGT1A9/UGT2A3/UGT2B28/CES1/PON1/ADH1A/GGT6/UGT1A1/UGT1A7/CYP3A4
REACTOME_INHIBITION_OF_DNA_RECOMBINATION_AT_TELOMERE	REACTOME_INHIBITION_OF_DNA_RECOMBINATION_AT_TELOMERE	67	0.58379	1.94434	6.08562e-05	0.000754008	0.000559865	6590	tags=46%, list=19%, signal=37%	H2AC14/H2AC4/H2BC14/H2BC7/H2BC17/H2BC8/H4C5/H2BC4/H2BC11/H2AX/H2BC10/H2BC12/H4C9/H4C1/H2BC9/H4C4/H2BC6/H2AC8/H4C8/H2BC13/H2AZ1/H4C3/H2AC6/POLR2D/H3-4/DAXX/H2BC15/H2BC5/POLR2G/H2AC19/H2AC18
REACTOME_MEIOTIC_SYNAPSIS	REACTOME_MEIOTIC_SYNAPSIS	78	0.565008	1.90725	6.08014e-05	0.000754008	0.000559865	3540	tags=36%, list=10%, signal=32%	SMC1B/H2AC14/H2AC4/LMNB1/H2BC14/H2BC7/BRCA1/H2BC17/H2BC8/H4C5/H2BC4/SYCP2/H2BC11/SYCE2/H2AX/H2BC10/STAG3/H2BC12/H4C9/REC8/H4C1/H2BC9/H4C4/H2BC6/H2AC8/H4C8/H2BC13/H2AZ1
REACTOME_UCH_PROTEINASES	REACTOME_UCH_PROTEINASES	100	0.524011	1.84363	6.09903e-05	0.000754008	0.000559865	8037	tags=41%, list=23%, signal=32%	H2AC14/H2AC12/H2AC4/PSMA8/H2AC17/H2AC16/BARD1/H2AC21/PSME4/TGFBR1/H2AC8/RPS27A/H2AC13/H2AC6/PSMB7/INO80B/PSMB5/PSMD14/NEDD8/UCHL1/PSMD1/UBA52/PSMB9/H2AC19/MBD6/H2AC18/PSMA4/RUVBL1/TFPT/ACTL6A/USP15/FOXK2/NFRKB/UCHL5/PSMA5/PSMC1/PSMC3/PSMD11/PSMA6/PSMB2/PSMA1
REACTOME_GAP_FILLING_DNA_REPAIR_SYNTHESIS_AND_LIGATION_IN_GG_NER	REACTOME_GAP_FILLING_DNA_REPAIR_SYNTHESIS_AND_LIGATION_IN_GG_NER	25	0.730813	1.98947	6.32685e-05	0.000774578	0.000575139	6119	tags=64%, list=18%, signal=53%	POLE2/POLD1/LIG1/RFC4/RFC3/RFC2/RFC5/RPS27A/POLD3/PCNA/POLE/POLE4/RPA2/POLE3/RPA3/UBA52
REACTOME_CARDIAC_CONDUCTION	REACTOME_CARDIAC_CONDUCTION	130	-0.452423	-1.76272	6.3055e-05	0.000774578	0.000575139	4278	tags=35%, list=12%, signal=30%	NPR2/KCNJ4/KCNIP1/HIPK2/SCN10A/KCNE2/SLC8A1/FXYD2/CAMK2D/FXYD6/SCN2B/ATP1B1/CASQ2/ATP1B2/ATP2A3/KCNJ12/ATP2B3/KCNK15/SCN11A/FXYD1/FGF12/KCNK4/FGF11/FGF14/KCNH2/CACNG4/KCNE4/CASQ1/CLIC2/SCN1B/KCNK10/FXYD4/KCND2/CAMK2A/FXYD7/KCNJ11/PLN/NOS1/KCNQ1/ATP1A4/KCNIP4/CACNG7/TRDN/SCN2A/CES1
KEGG_ANTIGEN_PROCESSING_AND_PRESENTATION	KEGG_ANTIGEN_PROCESSING_AND_PRESENTATION	79	-0.520335	-1.87648	6.41155e-05	0.000781156	0.000580023	6526	tags=42%, list=19%, signal=34%	CTSB/HLA-G/KLRC4/HLA-C/HLA-F/B2M/HSPA1L/KIR2DL4/NFYB/CD8A/CD8B/CTSS/HLA-E/HLA-B/KIR2DL1/KLRD1/HLA-A/HSPA2/CD4/KIR3DL1/CIITA/KIR3DL2/HLA-DMA/HLA-DRB1/HLA-DQB1/HLA-DPB1/HLA-DQA1/CD74/HLA-DRA/HLA-DPA1/HLA-DQA2/HLA-DOA/HLA-DRB5
WP_REGULATION_OF_SISTER_CHROMATID_SEPARATION_AT_THE_METAPHASEANAPHASE_TRANSITION	WP_REGULATION_OF_SISTER_CHROMATID_SEPARATION_AT_THE_METAPHASEANAPHASE_TRANSITION	15	0.831836	2.02159	6.71067e-05	0.000813669	0.000604164	1796	tags=47%, list=5%, signal=44%	CDC20/BUB1B/BUB1/PTTG1/ESPL1/CENPE/MAD2L1
REACTOME_FANCONI_ANEMIA_PATHWAY	REACTOME_FANCONI_ANEMIA_PATHWAY	39	0.651447	1.93715	7.0856e-05	0.000855018	0.000634867	6119	tags=44%, list=18%, signal=36%	EME1/UBE2T/FANCG/FANCD2/FANCI/FANCB/FANCA/FANCE/FANCC/USP1/RPS27A/DCLRE1B/FANCM/CENPX/RPA2/RPA3/UBA52
REACTOME_TELOMERE_C_STRAND_LAGGING_STRAND_SYNTHESIS	REACTOME_TELOMERE_C_STRAND_LAGGING_STRAND_SYNTHESIS	34	0.685936	1.98849	7.17327e-05	0.000861476	0.000639662	4953	tags=50%, list=14%, signal=43%	BLM/DNA2/FEN1/DSCC1/CHTF18/POLD1/LIG1/PRIM1/RFC4/RFC3/RFC2/RFC5/POLA2/POLD3/PRIM2/PCNA/RPA2
WP_GENES_CONTROLLING_NEPHROGENESIS	WP_GENES_CONTROLLING_NEPHROGENESIS	44	0.647974	1.96898	7.71229e-05	0.000921819	0.000684468	5057	tags=41%, list=15%, signal=35%	WT1/LMX1B/FOXD1/LHX1/EMX2/HOXD11/GDNF/ROBO2/EYA1/ETV4/FOXC2/SIX1/PAX2/FGF8/WNT4/NPHS1/GLI3/HOXA11
WP_CHOLESTEROL_METABOLISM_WITH_BLOCH_AND_KANDUTSCHRUSSELL_PATHWAYS	WP_CHOLESTEROL_METABOLISM_WITH_BLOCH_AND_KANDUTSCHRUSSELL_PATHWAYS	47	0.632103	1.94822	7.96165e-05	0.000947135	0.000703266	4348	tags=49%, list=13%, signal=43%	ACAT2/FDPS/HMGCS1/MVD/SOAT2/SQLE/ELOVL2/IDI1/ELOVL3/FDFT1/MVK/DHCR7/FASN/HSD17B7/HMGCR/SC5D/LBR/NSDHL/SCD/NR1H3/CYP51A1/LSS/FADS1
REACTOME_TCF_DEPENDENT_SIGNALING_IN_RESPONSE_TO_WNT	REACTOME_TCF_DEPENDENT_SIGNALING_IN_RESPONSE_TO_WNT	233	0.422703	1.63882	8.67981e-05	0.00102772	0.000763103	6721	tags=33%, list=20%, signal=27%	TERT/H3C2/H2AC14/H3C3/H2AC4/DKK1/H2BC14/WNT5A/H2BC7/SOX2/H2BC17/H2BC8/PSMA8/H4C5/H2BC4/H3C11/H3C7/WNT8B/H3C12/H2BC11/H2AX/H2BC10/H2BC12/H4C9/H3C8/FZD8/H4C1/SFRP1/H2BC9/H4C4/H2BC6/RSPO1/PSME4/H3C14/RSPO2/H2AC8/MYC/H4C8/RPS27A/WNT3/H2BC13/H2AZ1/H3C1/DKK4/WNT4/FZD4/HECW1/TLE1/FZD2/PPP2R1A/H4C3/H3C10/H2AC6/PSMB7/TLE4/H3C4/PSMB5/H3-4/PPP2R5C/LGR5/WIF1/PSMD14/H2BC15/H2BC5/PSMD1/DKK2/UBA52/PPP2R1B/WNT8A…
PID_HNF3A_PATHWAY	PID_HNF3A_PATHWAY	44	0.644949	1.95978	9.34666e-05	0.00110151	0.00081789	1936	tags=18%, list=6%, signal=17%	FOXA2/FOXA3/GCG/CYP2C18/APOB/BRCA1/FOXA1/TFF1
PID_DELTA_NP63_PATHWAY	PID_DELTA_NP63_PATHWAY	47	0.628954	1.93851	9.76426e-05	0.00114537	0.000850459	3384	tags=32%, list=10%, signal=29%	CCNB2/SFN/TOP2A/KRT5/BRCA2/HELLS/COL5A1/CDKN2A/TBXT/VDR/FASN/BDKRB2/DLX5/KRT14/PERP
BIOCARTA_EFP_PATHWAY	BIOCARTA_EFP_PATHWAY	16	0.803292	2.0006	0.000102009	0.00119105	0.000884379	2189	tags=31%, list=6%, signal=29%	CCNB2/SFN/CDK1/CCNB1/CDK2
BIOCARTA_ATRBRCA_PATHWAY	BIOCARTA_ATRBRCA_PATHWAY	21	0.763758	2.02917	0.000110241	0.00128124	0.000951343	3065	tags=48%, list=9%, signal=43%	RAD51/CHEK1/BRCA2/BRCA1/FANCG/FANCD2/FANCA/FANCE/FANCC/CHEK2
REACTOME_ANCHORING_OF_THE_BASAL_BODY_TO_THE_PLASMA_MEMBRANE	REACTOME_ANCHORING_OF_THE_BASAL_BODY_TO_THE_PLASMA_MEMBRANE	97	0.512513	1.79657	0.000115976	0.00134171	0.000996243	7706	tags=37%, list=22%, signal=29%	NEK2/PLK1/CDK1/PLK4/HAUS8/TUBB4B/CEP152/TUBB/CEP72/NDE1/ODF2/CENPJ/HAUS7/HAUS1/CEP164/KIF24/CEP89/PPP2R1A/CEP57/SEPTIN2/CNTRL/DCTN2/NPHP4/HAUS2/CSNK1E/DCTN3/CEP76/IQCB1/HAUS6/PCNT/CEP131/CDK5RAP2/MAPRE1/TUBG1/HAUS5/RAB8A
PID_ALK2_PATHWAY	PID_ALK2_PATHWAY	11	0.842316	1.9046	0.000119699	0.00137846	0.00102353	783	tags=27%, list=2%, signal=27%	BMP7/TLX2/AMH
REACTOME_MRNA_SPLICING	REACTOME_MRNA_SPLICING	190	0.443022	1.69261	0.000121744	0.00139563	0.00103628	12817	tags=65%, list=37%, signal=41%	PPIL1/YBX1/ALYREF/SNRPA1/LSM4/PHF5A/SUGP1/POLR2D/SNRPD1/EIF4A3/PRPF4/LSM2/SYMPK/NCBP1/PRPF38A/SNRPG/HNRNPA1/SNRPE/PRCC/LSM7/CSTF3/PPIH/POLR2G/SNRNP40/PRPF40A/SF3B4/SNRPA/SF3B6/SNRNP27/HNRNPR/POLR2L/SNRPC/CPSF1/SNRNP70/HNRNPA3/CPSF3/SNRPD2/HNRNPL/SMNDC1/SRSF7/DNAJC8/U2AF1/SF3A2/SRSF3/NUDT21/HNRNPM/POLR2H/DDX23/HNRNPD/LSM5/SRSF2/U2AF1L4/SNRPF/SF3A3/SRSF9/HSPA8/PUF60/HNRNPC/MAGOH/PAPOLA/HNRNPA2B1/DH…
REACTOME_DNA_DAMAGE_BYPASS	REACTOME_DNA_DAMAGE_BYPASS	48	0.632583	1.96139	0.000129366	0.0014763	0.00109618	6119	tags=44%, list=18%, signal=36%	PCLAF/DTL/POLE2/ISG15/POLD1/RFC4/RFC3/RFC2/MAD2L2/USP1/RFC5/RPS27A/POLD3/PCNA/POLE/POLE4/RPA2/POLE3/RAD18/RPA3/UBA52
REACTOME_RECRUITMENT_OF_MITOTIC_CENTROSOME_PROTEINS_AND_COMPLEXES	REACTOME_RECRUITMENT_OF_MITOTIC_CENTROSOME_PROTEINS_AND_COMPLEXES	81	0.542341	1.83896	0.000131456	0.00149338	0.00110886	7692	tags=38%, list=22%, signal=30%	NEK2/PLK1/CDK1/PLK4/HAUS8/TUBB4B/CEP152/TUBB/CEP72/NDE1/ODF2/CENPJ/HAUS7/HAUS1/CEP164/PPP2R1A/CEP57/MZT1/CNTRL/DCTN2/HAUS2/CSNK1E/DCTN3/CEP76/HAUS6/PCNT/CEP131/CDK5RAP2/MAPRE1/TUBG1/HAUS5
KEGG_FATTY_ACID_METABOLISM	KEGG_FATTY_ACID_METABOLISM	42	-0.617724	-1.96444	0.000140219	0.0015858	0.00117748	2719	tags=33%, list=8%, signal=31%	EHHADH/ACAT1/ACADSB/ALDH2/CYP4A11/ADH7/ACADL/CYP4A22/ACSL6/ADH6/ADH1A/ADH4/ADH1B/ADH1C
REACTOME_LAGGING_STRAND_SYNTHESIS	REACTOME_LAGGING_STRAND_SYNTHESIS	20	0.769781	2.00357	0.000141674	0.0015951	0.00118439	7354	tags=85%, list=21%, signal=67%	DNA2/FEN1/POLD1/LIG1/PRIM1/RFC4/RFC3/RFC2/RFC5/POLA2/POLD3/PRIM2/PCNA/RPA2/RPA3/POLA1/POLD2
REACTOME_TERMINATION_OF_TRANSLESION_DNA_SYNTHESIS	REACTOME_TERMINATION_OF_TRANSLESION_DNA_SYNTHESIS	32	0.686888	1.96795	0.000145411	0.00162269	0.00120488	6119	tags=53%, list=18%, signal=44%	PCLAF/POLE2/ISG15/POLD1/RFC4/RFC3/RFC2/RFC5/RPS27A/POLD3/PCNA/POLE/POLE4/RPA2/POLE3/RPA3/UBA52
REACTOME_SIGNALING_BY_ROBO_RECEPTORS	REACTOME_SIGNALING_BY_ROBO_RECEPTORS	218	0.426635	1.64707	0.000144831	0.00162269	0.00120488	10875	tags=57%, list=32%, signal=39%	ISL1/LHX2/LHX3/ROBO2/PSMA8/FLRT3/RPL39L/PSME4/NTN1/DCC/RPS27A/RPLP0/RPL37A/RPS19/AKAP5/RPS7/RPS5/RPS18/RPS3/RPL7A/RPL27A/RPS2/RPL13A/RPL18A/RPS12/RPL35/RPS8/LHX9/RPL10L/RPL17/PSMB7/MYO9B/RPL18/RPS10/EIF4A3/RPL36/PSMB5/NCBP1/RPL31/RPL11/RPS16/PSMD14/RPL28/RPS26/PFN2/RPS29/PSMD1/RPS24/RPL41/UBA52/RPS25/RPL36A/PSMB9/RPLP2/PAK4/RPS6/PSMA4/RPS13/RPS9/RPL22L1/PABPC1/RPL8/RPL7/RPS3A/PSMA5/RPS11/GPC1/PSM…
REACTOME_INITIATION_OF_NUCLEAR_ENVELOPE_NE_REFORMATION	REACTOME_INITIATION_OF_NUCLEAR_ENVELOPE_NE_REFORMATION	19	0.760695	1.96333	0.000149791	0.0016642	0.0012357	4452	tags=42%, list=13%, signal=37%	CCNB2/CDK1/CCNB1/LMNB1/VRK1/LBR/TMPO/PPP2R1A
REACTOME_ARACHIDONIC_ACID_METABOLISM	REACTOME_ARACHIDONIC_ACID_METABOLISM	59	-0.54884	-1.87759	0.000153267	0.00169535	0.00125883	3669	tags=37%, list=11%, signal=33%	ALOX15/CYP4F2/CYP2J2/EPHX2/ALOX5/TBXAS1/FAAH2/CYP4A11/CYP2U1/CYP4F22/CYP8B1/CYP2C8/PTGS1/AKR1C3/DPEP3/CYP4A22/ALOXE3/HPGDS/CYP4B1/CYP4F11/PON1/PTGDS
REACTOME_SIGNALING_BY_WNT	REACTOME_SIGNALING_BY_WNT	330	0.387746	1.55283	0.000156098	0.00171913	0.00127648	8177	tags=36%, list=24%, signal=28%	TERT/H3C2/H2AC14/H3C3/GNG13/WNT10B/H2AC4/GNB3/RAC3/DKK1/H2BC14/WNT5A/H2BC7/SOX2/H2BC17/H2BC8/PRKG2/PSMA8/H4C5/H2BC4/WNT6/H3C11/H3C7/WNT8B/H3C12/H2BC11/GNG8/H2AX/H2BC10/H2BC12/H4C9/H3C8/FZD8/WNT2/H4C1/SFRP1/H2BC9/PRKCG/H4C4/H2BC6/RSPO1/PSME4/H3C14/RSPO2/H2AC8/MYC/WNT11/H4C8/RPS27A/WNT3/H2BC13/H2AZ1/H3C1/DKK4/WNT4/FZD4/HECW1/TLE1/FZD2/PPP2R1A/AGO2/H4C3/H3C10/H2AC6/PSMB7/VANGL2/CLTB/GNG4/TLE4/H3C4/P…
REACTOME_REGULATION_OF_GENE_EXPRESSION_IN_BETA_CELLS	REACTOME_REGULATION_OF_GENE_EXPRESSION_IN_BETA_CELLS	21	0.756519	2.00994	0.000157634	0.001721	0.00127788	3130	tags=52%, list=9%, signal=48%	FOXA2/IAPP/FOXA3/RFX6/NKX2-2/HNF4G/PAX6/SLC2A2/PKLR/INS/NEUROD1
REACTOME_PCNA_DEPENDENT_LONG_PATCH_BASE_EXCISION_REPAIR	REACTOME_PCNA_DEPENDENT_LONG_PATCH_BASE_EXCISION_REPAIR	21	0.756202	2.0091	0.000157634	0.001721	0.00127788	6018	tags=71%, list=17%, signal=59%	POLE2/FEN1/POLD1/LIG1/RFC4/RFC3/RFC2/RFC5/POLD3/PCNA/POLE/POLE4/RPA2/POLE3/RPA3
WP_OXYSTEROLS_DERIVED_FROM_CHOLESTEROL	WP_OXYSTEROLS_DERIVED_FROM_CHOLESTEROL	46	-0.590975	-1.90305	0.000158952	0.00172792	0.00128301	4394	tags=39%, list=13%, signal=34%	LBP/HSD3B7/IL17B/NR1I2/CYP27A1/EPHX2/CYP7A1/CYP8B1/ACOT11/CH25H/ACOT12/CYP7B1/GPR183/ACOX2/AKR1D1/RORC/SLC27A2/CYP3A4
WP_DEVELOPMENT_OF_URETERIC_COLLECTION_SYSTEM	WP_DEVELOPMENT_OF_URETERIC_COLLECTION_SYSTEM	60	0.594763	1.93791	0.000165602	0.00179248	0.00133095	5189	tags=40%, list=15%, signal=34%	FREM2/WT1/SIX2/LHX1/BMP7/HOXD11/GDNF/ROBO2/GLI2/GLI1/FREM1/EYA1/ETV4/GATA3/SIX1/BMP5/WNT11/PAX2/GREB1L/MYCN/GLI3/TGFB2/HOXA11/VANGL2
BIOCARTA_G1_PATHWAY	BIOCARTA_G1_PATHWAY	28	0.709289	1.9716	0.000170083	0.00183312	0.00136112	5106	tags=43%, list=15%, signal=37%	CDK1/CDC25A/CDKN2A/E2F1/DHFR/CCNE1/CDK2/TGFB3/CCNA1/SKP2/TGFB2/TFDP1
REACTOME_E2F_MEDIATED_REGULATION_OF_DNA_REPLICATION	REACTOME_E2F_MEDIATED_REGULATION_OF_DNA_REPLICATION	22	0.751525	2.00346	0.000173323	0.0018522	0.00137529	6566	tags=59%, list=19%, signal=48%	CDK1/ORC1/CCNB1/ORC6/E2F1/PRIM1/POLA2/PRIM2/MCM8/PPP2R1A/TFDP1/PPP2R1B/POLA1
REACTOME_TRANSLESION_SYNTHESIS_BY_Y_FAMILY_DNA_POLYMERASES_BYPASSES_LESIONS_ON_DNA_TEMPLATE	REACTOME_TRANSLESION_SYNTHESIS_BY_Y_FAMILY_DNA_POLYMERASES_BYPASSES_LESIONS_ON_DNA_TEMPLATE	39	0.63676	1.89348	0.000172712	0.0018522	0.00137529	6119	tags=46%, list=18%, signal=38%	PCLAF/POLE2/ISG15/POLD1/RFC4/RFC3/RFC2/MAD2L2/RFC5/RPS27A/POLD3/PCNA/POLE/POLE4/RPA2/POLE3/RPA3/UBA52
WP_MEVALONATE_ARM_OF_CHOLESTEROL_BIOSYNTHESIS_PATHWAY	WP_MEVALONATE_ARM_OF_CHOLESTEROL_BIOSYNTHESIS_PATHWAY	13	0.82637	1.92295	0.000177685	0.0018908	0.00140396	2775	tags=62%, list=8%, signal=57%	ACAT2/FDPS/HMGCS1/MVD/IDI1/FDFT1/MVK/HMGCR
WP_OXIDATION_BY_CYTOCHROME_P450	WP_OXIDATION_BY_CYTOCHROME_P450	62	-0.542791	-1.86792	0.000180191	0.00190942	0.00141778	4154	tags=45%, list=12%, signal=40%	CYP4F8/CYP4X1/CYP4F2/CYP27A1/CYB5R2/CYP2J2/CYP2S1/CYP4V2/CYP4A11/CYP11B1/CYP7A1/CYP2U1/CYP4F22/CYP8B1/CYP2C8/CYP2A6/CYP2F1/CYP7B1/CYP3A5/CYB5A/CYP4Z1/CYP4A22/CYP4F12/CYP3A7/CYP4B1/CYP4F11/CYP11B2/CYP3A4
WP_MATRIX_METALLOPROTEINASES	WP_MATRIX_METALLOPROTEINASES	30	0.690471	1.94858	0.000181116	0.00191119	0.00141909	1859	tags=43%, list=5%, signal=41%	MMP10/MMP12/MMP13/MMP1/MMP9/MMP7/MMP14/MMP17/MMP20/MMP8/TIMP4/MMP23B/MMP27
SA_REG_CASCADE_OF_CYCLIN_EXPR	SA_REG_CASCADE_OF_CYCLIN_EXPR	13	0.823887	1.91717	0.000192404	0.00202184	0.00150126	3661	tags=62%, list=11%, signal=55%	E2F2/CCNA2/CCNE2/CDKN2A/E2F1/CCNE1/CDK2/CCNA1
REACTOME_DISEASES_OF_IMMUNE_SYSTEM	REACTOME_DISEASES_OF_IMMUNE_SYSTEM	31	-0.650271	-1.91313	0.000219002	0.0022918	0.0017017	5423	tags=45%, list=16%, signal=38%	NFKBIA/TLR6/TLR3/CD36/TLR1/TLR2/TLR5/FGB/BTK/LY96/TLR10/CD14/FGG/FGA
REACTOME_PHOSPHORYLATION_OF_THE_APC_C	REACTOME_PHOSPHORYLATION_OF_THE_APC_C	20	0.761124	1.98103	0.000221472	0.00230806	0.00171378	1020	tags=25%, list=3%, signal=24%	UBE2C/PLK1/CDK1/CCNB1/UBE2S
REACTOME_TRANSCRIPTIONAL_REGULATION_BY_RUNX1	REACTOME_TRANSCRIPTIONAL_REGULATION_BY_RUNX1	237	0.417337	1.62321	0.000222666	0.00231096	0.00171593	8056	tags=35%, list=23%, signal=27%	TP73/H3C2/H2AC14/H3C3/CTSV/H2AC4/H2BC14/H2BC7/CBX2/H2BC17/H2BC8/PSMA8/H4C5/H2BC4/H3C11/H3C7/H3C12/H2BC11/H2AX/H2BC10/H2BC12/GATA3/H4C9/ITGA2B/H3C8/H4C1/H2BC9/H4C4/SOCS3/H2BC6/PSME4/H3C14/RUNX2/H2AC8/IFNG/TCF3/NR4A3/H4C8/RPS27A/H2BC13/H2AZ1/H3C1/WDR5/PRKCQ/CBFB/GATA1/AGO2/H4C3/H3C10/PHC2/H2AC6/PSMB7/SIN3B/AUTS2/H3C4/PSMB5/AGO1/PSMD14/H2BC15/H2BC5/PSMD1/UBA52/PAX5/PSMB9/H2AC19/H2AC18/PSMA4/ACTL6A/A…
KEGG_TYPE_I_DIABETES_MELLITUS	KEGG_TYPE_I_DIABETES_MELLITUS	41	-0.610103	-1.93688	0.000225589	0.0023317	0.00173133	6883	tags=63%, list=20%, signal=51%	ICA1/HLA-G/HLA-C/HLA-F/IL12B/IL2/IL1A/CD86/FASLG/HLA-E/PTPRN/HLA-B/HLA-A/IL12A/TNF/HLA-DMA/HLA-DRB1/IL1B/HLA-DQB1/HLA-DPB1/HLA-DQA1/HLA-DRA/HLA-DPA1/HLA-DQA2/HLA-DOA/HLA-DRB5
REACTOME_SYNTHESIS_SECRETION_AND_INACTIVATION_OF_GLUCOSE_DEPENDENT_INSULINOTROPIC_POLYPEPTIDE_GIP	REACTOME_SYNTHESIS_SECRETION_AND_INACTIVATION_OF_GLUCOSE_DEPENDENT_INSULINOTROPIC_POLYPEPTIDE_GIP	13	0.818078	1.90365	0.000238789	0.00245806	0.00182516	2587	tags=38%, list=8%, signal=36%	ISL1/GIP/FFAR1/PAX6/GATA4
REACTOME_INTRA_GOLGI_AND_RETROGRADE_GOLGI_TO_ER_TRAFFIC	REACTOME_INTRA_GOLGI_AND_RETROGRADE_GOLGI_TO_ER_TRAFFIC	203	0.438417	1.68003	0.000242811	0.00248931	0.00184836	7986	tags=27%, list=23%, signal=21%	KIF2C/KIFC1/KIF20A/KIF18B/KIF4A/KIF23/KIF11/KIF15/RACGAP1/KIF18A/TUBA3C/CENPE/TUBB2B/TUBB6/KIF20B/KDELR3/ALPP/KIF26A/TUBB2A/TUBB3/TUBB4B/BICD1/KIF22/GALNT2/KIF1A/KIF4B/KIF26B/TUBA1B/PLIN3/TUBB1/CYTH2/TUBA1C/CYTH1/TUBA8/KIF1B/DCTN2/SURF4/PLA2G4A/PAFAH1B3/DCTN3/TUBA3D/RABEPK/NAA35/KLC1/KIF3C/KDELR2/KDELR1/STX5/KIF12/ARFIP2/STX6/TUBB8/CYTH3/KIF2A/NBAS
KEGG_PORPHYRIN_AND_CHLOROPHYLL_METABOLISM	KEGG_PORPHYRIN_AND_CHLOROPHYLL_METABOLISM	40	-0.614651	-1.92598	0.000264194	0.00269756	0.00200299	3531	tags=30%, list=10%, signal=27%	UGT2B4/UGT2B15/ALAD/UGT1A6/UGT2B17/UGT2B11/UGT1A8/UGT1A9/UGT2A3/UGT2B28/UGT1A1/UGT1A7
REACTOME_EICOSANOIDS	REACTOME_EICOSANOIDS	12	-0.831905	-1.95792	0.000269146	0.00272605	0.00202414	4154	tags=83%, list=12%, signal=73%	CYP4F8/CYP4F2/TBXAS1/CYP4A11/CYP4F22/CYP8B1/CYP4A22/CYP4F12/CYP4B1/CYP4F11
KEGG_HOMOLOGOUS_RECOMBINATION	KEGG_HOMOLOGOUS_RECOMBINATION	28	0.700776	1.94793	0.000269028	0.00272605	0.00202414	7410	tags=64%, list=22%, signal=50%	RAD54L/RAD51/EME1/BRCA2/BLM/XRCC2/POLD1/RAD54B/XRCC3/POLD3/RPA4/RPA2/RPA3/TOP3B/RAD51C/RAD51B/POLD2/MRE11
REACTOME_NONHOMOLOGOUS_END_JOINING_NHEJ	REACTOME_NONHOMOLOGOUS_END_JOINING_NHEJ	67	0.557825	1.85787	0.000277301	0.00279741	0.00207713	8003	tags=49%, list=23%, signal=38%	H2BC14/H2BC7/BRCA1/H2BC17/H2BC8/H4C5/H2BC4/H2BC11/H2AX/H2BC10/H2BC12/H4C9/BARD1/H4C1/H2BC9/H4C4/H2BC6/H4C8/H2BC13/NSD2/H4C3/DCLRE1C/TDP1/H3-4/H2BC15/H2BC5/MDC1/PRKDC/MRE11/XRCC5/UBE2V2/RNF168/RIF1
BIOCARTA_PTC1_PATHWAY	BIOCARTA_PTC1_PATHWAY	11	0.826379	1.86856	0.000287419	0.00287728	0.00213644	2319	tags=45%, list=7%, signal=42%	CDK1/CDC25C/CDC25A/CCNB1/CDC25B
REACTOME_TRANSPORT_OF_MATURE_TRANSCRIPT_TO_CYTOPLASM	REACTOME_TRANSPORT_OF_MATURE_TRANSCRIPT_TO_CYTOPLASM	84	0.524656	1.77849	0.0002875	0.00287728	0.00213644	13059	tags=70%, list=38%, signal=44%	DDX39A/NUP188/ALYREF/NDC1/NUP107/NUP62/SARNP/NUP85/EIF4A3/NUP155/SYMPK/NCBP1/THOC3/GLE1/THOC5/CPSF1/CPSF3/NUP35/NUP160/SRSF7/U2AF1/NUP58/NUP93/SRSF3/SRSF2/NUP210/U2AF1L4/SRSF9/POLDIP3/CHTOP/MAGOH/RAE1/NUP205/NUP214/NUP98/TPR/NUP50/SRSF11/SLBP/NUP153/NUP37/RBM8A/CPSF4/SRRM1/LUZP4/DDX39B/RNPS1/NUP54/U2AF2/NUP133/SRSF1/MAGOHB/DHX38/SRSF4/NXT1/CPSF2/NUP43/CDC40/SEC13
REACTOME_SYNTHESIS_SECRETION_AND_INACTIVATION_OF_GLUCAGON_LIKE_PEPTIDE_1_GLP_1	REACTOME_SYNTHESIS_SECRETION_AND_INACTIVATION_OF_GLUCAGON_LIKE_PEPTIDE_1_GLP_1	21	0.741526	1.97011	0.000320966	0.00319951	0.00237569	1433	tags=33%, list=4%, signal=32%	FFAR1/GNG13/GCG/GNAT3/GNB3/LEP/PAX6
NABA_COLLAGENS	NABA_COLLAGENS	44	0.625202	1.89978	0.000328051	0.00323182	0.00239968	3598	tags=48%, list=10%, signal=43%	COL2A1/COL22A1/COL20A1/COL11A1/COL5A3/COL5A1/COL3A1/COL5A2/COL13A1/COL6A3/COL4A2/COL8A1/COL7A1/COL4A1/COL1A2/COL9A1/COL6A2/COL1A1/COL23A1/COL24A1/COL11A2
REACTOME_COLLAGEN_CHAIN_TRIMERIZATION	REACTOME_COLLAGEN_CHAIN_TRIMERIZATION	44	0.625202	1.89978	0.000328051	0.00323182	0.00239968	3598	tags=48%, list=10%, signal=43%	COL2A1/COL22A1/COL20A1/COL11A1/COL5A3/COL5A1/COL3A1/COL5A2/COL13A1/COL6A3/COL4A2/COL8A1/COL7A1/COL4A1/COL1A2/COL9A1/COL6A2/COL1A1/COL23A1/COL24A1/COL11A2
REACTOME_PI3K_EVENTS_IN_ERBB2_SIGNALING	REACTOME_PI3K_EVENTS_IN_ERBB2_SIGNALING	16	-0.757327	-1.88028	0.000327434	0.00323182	0.00239968	4650	tags=56%, list=14%, signal=49%	GAB1/NRG3/PIK3R1/NRG2/NRG1/BTC/EGF/ERBB4/ERBB3
WP_CHOLESTEROL_SYNTHESIS_DISORDERS	WP_CHOLESTEROL_SYNTHESIS_DISORDERS	18	0.748617	1.91812	0.00033646	0.00330176	0.00245162	3994	tags=72%, list=12%, signal=64%	FDPS/HMGCS1/MVD/SQLE/IDI1/FDFT1/MVK/DHCR7/HMGCR/SC5D/LBR/CYP51A1/LSS
REACTOME_MITOTIC_TELOPHASE_CYTOKINESIS	REACTOME_MITOTIC_TELOPHASE_CYTOKINESIS	13	0.809735	1.88424	0.000344445	0.00335402	0.00249042	380	tags=23%, list=1%, signal=23%	PLK1/KIF20A/KIF23
REACTOME_IMMUNOREGULATORY_INTERACTIONS_BETWEEN_A_LYMPHOID_AND_A_NON_LYMPHOID_CELL	REACTOME_IMMUNOREGULATORY_INTERACTIONS_BETWEEN_A_LYMPHOID_AND_A_NON_LYMPHOID_CELL	186	-0.387814	-1.59106	0.00034435	0.00335402	0.00249042	3641	tags=30%, list=11%, signal=27%	ITGB2/LAIR1/CD160/HLA-B/ITGB7/TYROBP/KIR2DL1/KLRD1/IGKV1D-33/KLRG1/CD19/HCST/HLA-A/CD3E/CD247/SH2D1B/LAIR2/CD40/FCGR2B/TREML1/ITGAL/CD96/IGHV4-59/SLAMF6/TREM2/KIR3DL1/MADCAM1/CD200R1/LILRA1/KLRF1/COLEC12/KIR3DL2/TRBV7-9/CD1A/TRAV29DV5/SH2D1A/NCR3/TRAV8-4/JAML/CD40LG/NCR1/IGKV1-16/SIGLEC8/IGKV1-39/IGHV1-46/IGKV1D-12/IGLV3-27/IGKV1-17/KLRB1/TRBV12-3/IGLV7-43/C3/CD1C/CD1B/SIGLEC6
REACTOME_APC_CDC20_MEDIATED_DEGRADATION_OF_NEK2A	REACTOME_APC_CDC20_MEDIATED_DEGRADATION_OF_NEK2A	26	0.702653	1.92156	0.000349002	0.00337596	0.00250671	3580	tags=31%, list=10%, signal=28%	CDC20/UBE2C/NEK2/BUB1B/UBE2S/MAD2L1/RPS27A/BUB3
KEGG_HEMATOPOIETIC_CELL_LINEAGE	KEGG_HEMATOPOIETIC_CELL_LINEAGE	84	-0.489786	-1.79177	0.000349376	0.00337596	0.00250671	6741	tags=56%, list=20%, signal=45%	FCGR1A/CD3G/KIT/CD3D/MME/ITGA2/KITLG/IL7R/IL1R1/CD38/CD8A/IL7/CD33/MS4A1/CD8B/CD36/IL1A/CD37/IL6R/CD55/CD7/CD19/GYPA/CD3E/IL5RA/CD2/FLT3/CD4/CSF2/ITGAM/TNF/CSF3R/CD1A/CSF2RA/CSF1R/CR1/CSF1/HLA-DRB1/IL1B/CD14/IL3/HLA-DRA/CR2/HLA-DRB5/CD1E/CD1C/CD1B
PID_BARD1_PATHWAY	PID_BARD1_PATHWAY	29	0.677813	1.90413	0.000360148	0.00346676	0.00257414	2189	tags=34%, list=6%, signal=32%	RAD51/BRCA1/FANCG/FANCD2/CCNE1/FANCA/FANCE/FANCC/BARD1/CDK2
REACTOME_APC_C_CDH1_MEDIATED_DEGRADATION_OF_CDC20_AND_OTHER_APC_C_CDH1_TARGETED_PROTEINS_IN_LATE_MITOSIS_EARLY_G1	REACTOME_APC_C_CDH1_MEDIATED_DEGRADATION_OF_CDC20_AND_OTHER_APC_C_CDH1_TARGETED_PROTEINS_IN_LATE_MITOSIS_EARLY_G1	74	0.534277	1.80432	0.000388461	0.00372509	0.00276595	10534	tags=51%, list=31%, signal=36%	CDC20/AURKB/UBE2C/PLK1/PTTG1/AURKA/PSMA8/UBE2S/PSME4/RPS27A/SKP2/PSMB7/PSMB5/PSMD14/PSMD1/UBA52/PSMB9/PSMA4/CDC26/PSMA5/PSMC1/PSMC3/PSMD11/PSMA6/PSMB2/PSMA1/PSMC6/CDC23/PSMD2/ANAPC11/PSMD13/ANAPC7/ANAPC2/PSMA3/PSMB4/PSMD4/PSME1/ANAPC5
REACTOME_NUCLEAR_ENVELOPE_BREAKDOWN	REACTOME_NUCLEAR_ENVELOPE_BREAKDOWN	53	0.589631	1.86231	0.000397984	0.00380196	0.00282302	10286	tags=55%, list=30%, signal=38%	CCNB2/PLK1/CDK1/CCNB1/LMNB1/NEK6/VRK1/NUP188/NDC1/TMPO/NUP107/NUP62/NUP85/NUP155/LPIN1/NUP35/NUP160/NUP58/NUP93/NUP210/RAE1/LEMD3/NUP205/NUP214/NUP98/TPR/NUP50/NUP153/NUP37
REACTOME_PHASE_0_RAPID_DEPOLARISATION	REACTOME_PHASE_0_RAPID_DEPOLARISATION	32	-0.631384	-1.87447	0.000400659	0.00381306	0.00283127	4025	tags=38%, list=12%, signal=33%	SCN10A/CAMK2D/SCN2B/SCN11A/FGF12/FGF11/FGF14/CACNG4/SCN1B/CAMK2A/CACNG7/SCN2A
KEGG_INTESTINAL_IMMUNE_NETWORK_FOR_IGA_PRODUCTION	KEGG_INTESTINAL_IMMUNE_NETWORK_FOR_IGA_PRODUCTION	45	-0.587508	-1.88789	0.000402741	0.00381847	0.00283529	4087	tags=44%, list=12%, signal=39%	TNFSF13/CD86/ITGB7/IL15/CD40/CXCL12/MADCAM1/HLA-DMA/CD40LG/HLA-DRB1/PIGR/HLA-DQB1/CCR9/HLA-DPB1/HLA-DQA1/HLA-DRA/HLA-DPA1/HLA-DQA2/HLA-DOA/HLA-DRB5
NABA_ECM_GLYCOPROTEINS	NABA_ECM_GLYCOPROTEINS	196	0.415199	1.58481	0.000410736	0.00387969	0.00288074	4635	tags=33%, list=13%, signal=28%	LAMA1/TNC/IBSP/ZPLD1/CILP2/VIT/ELN/CILP/IGFBPL1/NID2/COMP/MATN3/TINAG/LAMA4/ELSPBP1/MFAP2/NTNG1/FGL1/FN1/FBN2/EMILIN1/TNFAIP6/MEPE/PCOLCE/PXDN/DMBT1/LTBP2/THBS4/PXDNL/SPARC/VWCE/FNDC8/MFAP5/OIT3/LRG1/TSPEAR/CCN4/NTNG2/RELN/RSPO1/ZP4/LTBP1/NTN5/COCH/RSPO2/MXRA5/MATN4/NTN1/SBSPON/OTOG/POSTN/SSPOP/CTHRC1/LAMA2/EMILIN3/ZP2/EMID1/DMP1/CCN6/EGFLAM/PAPLN/THBS3/EMILIN2/NELL1
WP_PROSTAGLANDIN_SYNTHESIS_AND_REGULATION	WP_PROSTAGLANDIN_SYNTHESIS_AND_REGULATION	45	-0.587049	-1.88642	0.000412873	0.00388532	0.00288492	3627	tags=36%, list=11%, signal=32%	EDN1/AKR1B1/ANXA4/TBXAS1/AKR1C1/AKR1C2/PTGS1/AKR1C3/MITF/SOX9/HPGDS/PTGER3/PTGDR/PPARGC1A/ANXA3/PTGDS
REACTOME_ETHANOL_OXIDATION	REACTOME_ETHANOL_OXIDATION	12	-0.819351	-1.92837	0.000419476	0.00391842	0.0029095	280	tags=67%, list=1%, signal=66%	ALDH2/ADH7/ALDH1A1/ADH6/ADH1A/ADH4/ADH1B/ADH1C
REACTOME_TRANSCRIPTIONAL_REGULATION_BY_E2F6	REACTOME_TRANSCRIPTIONAL_REGULATION_BY_E2F6	34	0.652395	1.89125	0.000419498	0.00391842	0.0029095	1359	tags=21%, list=4%, signal=20%	RRM2/RAD51/CHEK1/EZH2/BRCA1/CDC7/E2F1
KEGG_MATURITY_ONSET_DIABETES_OF_THE_YOUNG	KEGG_MATURITY_ONSET_DIABETES_OF_THE_YOUNG	25	0.690059	1.87852	0.000431496	0.00401562	0.00298167	3151	tags=44%, list=9%, signal=40%	FOXA2/IAPP/FOXA3/NKX2-2/HNF4G/PAX6/SLC2A2/PKLR/INS/NEUROD1/MNX1
REACTOME_COMPLEMENT_CASCADE	REACTOME_COMPLEMENT_CASCADE	114	-0.435477	-1.66505	0.000462081	0.00428444	0.00318128	5340	tags=34%, list=16%, signal=29%	C1R/IGLV6-57/CFI/C8B/IGHV3-13/CFD/IGLV1-40/GZMM/IGKV2-28/PROS1/IGHV4-34/CD55/IGKV1D-33/CD19/CFHR3/CLU/COLEC11/C6/C9/IGHV4-59/C5AR1/C7/C4B/CR1/C4A/IGKV1-16/IGKV1-39/IGHV1-46/IGKV1D-12/IGLV3-27/IGKV1-17/CR2/C4BPA/IGLV7-43/CFHR1/C3/COLEC10/MASP1/F2
REACTOME_ERYTHROCYTES_TAKE_UP_CARBON_DIOXIDE_AND_RELEASE_OXYGEN	REACTOME_ERYTHROCYTES_TAKE_UP_CARBON_DIOXIDE_AND_RELEASE_OXYGEN	13	0.799037	1.85934	0.000496925	0.00459064	0.00340863	3139	tags=62%, list=9%, signal=56%	SLC4A1/HBB/RHAG/HBA2/CA4/HBA1/CA2/CA1
REACTOME_CHK1_CHK2_CDS1_MEDIATED_INACTIVATION_OF_CYCLIN_B_CDK1_COMPLEX	REACTOME_CHK1_CHK2_CDS1_MEDIATED_INACTIVATION_OF_CYCLIN_B_CDK1_COMPLEX	13	0.798397	1.85785	0.000505419	0.00465207	0.00345425	3065	tags=54%, list=9%, signal=49%	SFN/CDK1/CDC25C/CHEK1/CCNB1/WEE1/CHEK2
REACTOME_REGULATION_OF_CHOLESTEROL_BIOSYNTHESIS_BY_SREBP_SREBF	REACTOME_REGULATION_OF_CHOLESTEROL_BIOSYNTHESIS_BY_SREBP_SREBF	55	0.572278	1.82151	0.000508189	0.00466056	0.00346055	3994	tags=31%, list=12%, signal=27%	FDPS/HMGCS1/MVD/SQLE/IDI1/INSIG1/FDFT1/MVK/DHCR7/FASN/HMGCR/RAN/SC5D/SCAP/SCD/CYP51A1/LSS
REACTOME_AMYLOID_FIBER_FORMATION	REACTOME_AMYLOID_FIBER_FORMATION	109	0.480543	1.70934	0.000518352	0.00473653	0.00351696	3543	tags=35%, list=10%, signal=31%	APOA1/IAPP/H3C2/H2AC14/H3C3/H2AC4/H2BC14/APCS/H2BC7/H2BC17/H2BC8/H4C5/H2BC4/H3C11/ODAM/H3C7/H3C12/H2BC11/H2AX/H2BC10/H2BC12/H4C9/H3C8/H4C1/NPPA/H2BC9/H4C4/H2BC6/H3C14/H2AC8/TSPAN15/BACE1/INS/H4C8/RPS27A/H2BC13/H2AZ1/H3C1
REACTOME_PROTEIN_UBIQUITINATION	REACTOME_PROTEIN_UBIQUITINATION	79	0.521769	1.76144	0.000521867	0.00475143	0.00352803	6119	tags=27%, list=18%, signal=22%	UBE2C/UBE2T/H2BC14/H2BC7/H2BC17/H2BC8/H2BC4/UBE2S/H2BC11/H2BC10/H2BC12/H2BC9/H2BC6/RPS27A/H2BC13/PCNA/SELENOS/RAD18/H2BC15/H2BC5/UBA52
WP_CONSTITUTIVE_ANDROSTANE_RECEPTOR_PATHWAY	WP_CONSTITUTIVE_ANDROSTANE_RECEPTOR_PATHWAY	31	-0.629758	-1.85277	0.000526724	0.00476128	0.00353534	1619	tags=29%, list=5%, signal=28%	CYP4A11/UGT1A6/CYP2A6/CYP3A5/GSTA2/PPARGC1A/UGT1A9/UGT1A1/CYP3A4
REACTOME_ANTIVIRAL_MECHANISM_BY_IFN_STIMULATED_GENES	REACTOME_ANTIVIRAL_MECHANISM_BY_IFN_STIMULATED_GENES	82	0.511064	1.73201	0.000525147	0.00476128	0.00353534	10501	tags=54%, list=30%, signal=37%	USP41/OASL/KPNA2/ISG15/OAS3/OAS1/NUP188/RPS27A/NDC1/KPNA5/USP18/NUP107/KPNA7/NUP62/OAS2/NUP85/STAT1/EIF4E2/EIF4A3/NUP155/KPNB1/UBA52/NUP35/NUP160/IFIT1/FLNA/PIN1/NUP58/NUP93/MX1/NUP210/EIF2AK2/RAE1/NUP205/NUP214/NUP98/TPR/NUP50/KPNA3/DDX58/NUP153/NUP37/TRIM25/UBE2L6
REACTOME_SELENOAMINO_ACID_METABOLISM	REACTOME_SELENOAMINO_ACID_METABOLISM	118	0.474469	1.69732	0.000531817	0.00479015	0.00355678	9346	tags=58%, list=27%, signal=43%	CBS/EPRS1/RPL39L/RPS27A/RPLP0/RPL37A/RPS19/RPS7/RPS5/RPS18/RPS3/RPL7A/RPL27A/RPS2/RPL13A/RPL18A/RPS12/RPL35/RPS8/RPL10L/RPL17/RPL18/RPS10/RPL36/NNMT/RPL31/RPL11/RPS16/RPL28/RPS26/RPS29/RPS24/RPL41/UBA52/RPS25/RPL36A/RPLP2/RPS6/AHCY/RPS13/RPS9/IARS1/RPL22L1/MARS1/RPL8/RPL7/RPS3A/RPS11/RPS15/RPL23A/RPL12/RPS27/RPL30/RPS21/RPL10A/RPL13/RPS15A/RPL21/RPL5/RPS17/SCLY/RPL3/RPL27/RPL6/RPL3L/RPL29/RPS28/R…
REACTOME_CYCLIN_A_CDK2_ASSOCIATED_EVENTS_AT_S_PHASE_ENTRY	REACTOME_CYCLIN_A_CDK2_ASSOCIATED_EVENTS_AT_S_PHASE_ENTRY	85	0.519724	1.76744	0.000535976	0.00481043	0.00357183	8037	tags=38%, list=23%, signal=29%	CCNA2/CDC25A/CCNE2/E2F1/CKS1B/CCNE1/CDK2/CDC25B/LIN9/WEE1/MYC/RPS27A/CCNA1/PTK6/SKP2/TFDP1/PSMB7/PSMB5/PSMD14/PSMD1/UBA52/PSMB9/PSMA4/CDK4/PSMA5/PSMC1/PSMC3/LIN37/PSMD11/PSMA6/PSMB2/PSMA1
BIOCARTA_LECTIN_PATHWAY	BIOCARTA_LECTIN_PATHWAY	12	-0.811139	-1.90904	0.000550696	0.00490762	0.003644	2384	tags=58%, list=7%, signal=54%	C6/C9/C7/C4B/C4A/C3/MASP1
REACTOME_CYCLIN_D_ASSOCIATED_EVENTS_IN_G1	REACTOME_CYCLIN_D_ASSOCIATED_EVENTS_IN_G1	47	0.596656	1.83897	0.000548844	0.00490762	0.003644	6713	tags=40%, list=19%, signal=33%	E2F2/CCNE2/CDKN2A/E2F1/CKS1B/CCNE1/CDK2/RBL1/RPS27A/CDKN2D/PTK6/SKP2/CDKN2C/PPP2R1A/TFDP1/UBA52/PPP2R1B/E2F3/CDK4
WP_COMPLEMENT_AND_COAGULATION_CASCADES	WP_COMPLEMENT_AND_COAGULATION_CASCADES	58	-0.525339	-1.7929	0.000578001	0.00513281	0.00381121	5340	tags=43%, list=16%, signal=36%	C1R/CFI/F9/CFD/F8/PROS1/CD55/KLKB1/F7/F10/CLU/C6/C9/PLAT/F3/C5AR1/FGB/SERPINA1/C7/C4B/CR1/CR2/C3/MASP1/F2
REACTOME_APC_C_CDC20_MEDIATED_DEGRADATION_OF_CYCLIN_B	REACTOME_APC_C_CDC20_MEDIATED_DEGRADATION_OF_CYCLIN_B	24	0.703683	1.90119	0.000582582	0.00515534	0.00382794	1020	tags=21%, list=3%, signal=20%	CDC20/UBE2C/CDK1/CCNB1/UBE2S
WP_PREGNANE_X_RECEPTOR_PATHWAY	WP_PREGNANE_X_RECEPTOR_PATHWAY	32	-0.622985	-1.84953	0.000587075	0.00517693	0.00384397	1619	tags=31%, list=5%, signal=30%	UGT1A6/CYP2A6/CYP3A5/GSTA2/CYP4F12/CYP3A7/PPARGC1A/UGT1A9/UGT1A1/CYP3A4
REACTOME_DEGRADATION_OF_THE_EXTRACELLULAR_MATRIX	REACTOME_DEGRADATION_OF_THE_EXTRACELLULAR_MATRIX	140	0.454525	1.67209	0.000612073	0.00537856	0.00399368	3598	tags=33%, list=10%, signal=30%	COL2A1/MMP10/MMP12/CTRB2/ACAN/MMP13/MMP1/CTRB1/COL11A1/ELN/CTSV/MMP9/MMP7/MMP14/COL5A3/COL5A1/COL3A1/MMP17/COL5A2/COL13A1/COL6A3/MMP20/COL4A2/MMP8/ADAMTS4/FN1/FBN2/DCN/COL8A1/COL7A1/COL4A1/ADAM8/COL1A2/ELANE/BMP1/COL9A1/ADAMTS1/COL6A2/MMP15/COL1A1/KLK7/COL23A1/ADAMTS5/MMP16/ADAMTS9/COL11A2
REACTOME_GAMMA_CARBOXYLATION_TRANSPORT_AND_AMINO_TERMINAL_CLEAVAGE_OF_PROTEINS	REACTOME_GAMMA_CARBOXYLATION_TRANSPORT_AND_AMINO_TERMINAL_CLEAVAGE_OF_PROTEINS	11	-0.804881	-1.84862	0.000617603	0.00540831	0.00401577	4857	tags=55%, list=14%, signal=47%	F9/GAS6/PROS1/F7/F10/F2
KEGG_LEISHMANIA_INFECTION	KEGG_LEISHMANIA_INFECTION	70	-0.508466	-1.79386	0.000627879	0.00547928	0.00406846	3661	tags=31%, list=11%, signal=28%	NCF1/ITGB2/IFNGR1/IL12A/CYBA/TLR2/ITGAM/TNF/FCGR2C/HLA-DMA/CR1/HLA-DRB1/IL1B/HLA-DQB1/HLA-DPB1/HLA-DQA1/HLA-DRA/HLA-DPA1/HLA-DQA2/HLA-DOA/HLA-DRB5/C3
WP_DOPAMINE_METABOLISM	WP_DOPAMINE_METABOLISM	13	-0.783357	-1.88798	0.000632725	0.00550252	0.00408573	1649	tags=38%, list=5%, signal=37%	PRKACG/DDC/MAOA/MAOB/TYR
PID_SYNDECAN_1_PATHWAY	PID_SYNDECAN_1_PATHWAY	46	0.591394	1.81027	0.000641715	0.00556153	0.00412954	3598	tags=41%, list=10%, signal=37%	COL2A1/MMP1/COL11A1/MMP9/MMP7/COL5A1/COL3A1/COL5A2/COL13A1/COL6A3/COL8A1/COL7A1/COL4A1/COL1A2/COL9A1/SDC1/COL6A2/COL1A1/COL11A2
REACTOME_INTERLEUKIN_RECEPTOR_SHC_SIGNALING	REACTOME_INTERLEUKIN_RECEPTOR_SHC_SIGNALING	27	-0.653084	-1.8778	0.000677098	0.00584808	0.00434231	7682	tags=56%, list=22%, signal=43%	PTPN6/IL5/PIK3CD/PIK3CB/IL2/CSF2RB/PIK3R1/IL2RG/JAK3/IL5RA/INPP5D/IL2RB/CSF2/CSF2RA/IL3
BIOCARTA_SRCRPTP_PATHWAY	BIOCARTA_SRCRPTP_PATHWAY	11	0.805242	1.82077	0.000680372	0.00585631	0.00434842	2319	tags=45%, list=7%, signal=42%	CDK1/CDC25C/CDC25A/CCNB1/CDC25B
REACTOME_POLYMERASE_SWITCHING	REACTOME_POLYMERASE_SWITCHING	14	0.780315	1.86824	0.000735321	0.00630775	0.00468362	4091	tags=71%, list=12%, signal=63%	POLD1/PRIM1/RFC4/RFC3/RFC2/RFC5/POLA2/POLD3/PRIM2/PCNA
REACTOME_PROCESSIVE_SYNTHESIS_ON_THE_LAGGING_STRAND	REACTOME_PROCESSIVE_SYNTHESIS_ON_THE_LAGGING_STRAND	15	0.782671	1.90211	0.000739129	0.00631036	0.00468556	7354	tags=87%, list=21%, signal=68%	DNA2/FEN1/POLD1/LIG1/PRIM1/POLA2/POLD3/PRIM2/PCNA/RPA2/RPA3/POLA1/POLD2
BIOCARTA_EXTRINSIC_PATHWAY	BIOCARTA_EXTRINSIC_PATHWAY	13	-0.778989	-1.87745	0.000740629	0.00631036	0.00468556	4218	tags=62%, list=12%, signal=54%	PROS1/F7/F10/F3/FGB/FGG/F2/FGA
WP_HEPATITIS_C_AND_HEPATOCELLULAR_CARCINOMA	WP_HEPATITIS_C_AND_HEPATOCELLULAR_CARCINOMA	50	0.590664	1.85212	0.000786875	0.00668181	0.00496137	1133	tags=20%, list=3%, signal=19%	RRM2/BIRC5/E2F2/MMP1/CXCL8/PTGS2/BRCA1/CXCR1/IL6/COL4A2
REACTOME_ERBB2_REGULATES_CELL_MOTILITY	REACTOME_ERBB2_REGULATES_CELL_MOTILITY	14	-0.759994	-1.8486	0.000790457	0.0066897	0.00496723	4468	tags=50%, list=13%, signal=44%	NRG3/NRG2/NRG1/BTC/EGF/ERBB4/ERBB3
WP_BURN_WOUND_HEALING	WP_BURN_WOUND_HEALING	110	0.479226	1.70648	0.000880994	0.00743099	0.00551765	3266	tags=25%, list=9%, signal=22%	KRT6A/HOTAIR/CHRNA7/TNC/MMP13/MMP1/ADAM12/CXCL8/SCEL/ELN/MMP9/FOXE1/CXCL1/IL6/FGFR4/NOX4/S100A9/FN1/DCN/IFNB1/COL1A2/SPARC/SERPINH1/TGFB3/TNFAIP3/COL1A1/VIM
REACTOME_SYNTHESIS_OF_BILE_ACIDS_AND_BILE_SALTS_VIA_24_HYDROXYCHOLESTEROL	REACTOME_SYNTHESIS_OF_BILE_ACIDS_AND_BILE_SALTS_VIA_24_HYDROXYCHOLESTEROL	14	-0.75699	-1.84129	0.000891151	0.00749161	0.00556266	4106	tags=57%, list=12%, signal=50%	HSD3B7/CYP27A1/AKR1C1/CYP8B1/AKR1C2/AKR1C3/AKR1D1/SLC27A2
REACTOME_GLOBAL_GENOME_NUCLEOTIDE_EXCISION_REPAIR_GG_NER	REACTOME_GLOBAL_GENOME_NUCLEOTIDE_EXCISION_REPAIR_GG_NER	84	0.502313	1.70275	0.000899887	0.00753992	0.00559853	10370	tags=49%, list=30%, signal=34%	POLE2/POLD1/LIG1/RFC4/RFC3/RFC2/RFC5/RPS27A/POLD3/PCNA/POLE/POLE4/PARP2/RPA2/POLE3/COPS7B/INO80B/RPA3/UBA52/RUVBL1/TFPT/ACTL6A/NFRKB/SUMO1/POLD2/ERCC2/UBE2V2/COPS8/SUMO2/PARP1/ERCC1/RBX1/GTF2H2/GTF2H3/CHD1L/COPS3/SUMO3/RAD23B/DDB2/ERCC3/RAD23A
BIOCARTA_RB_PATHWAY	BIOCARTA_RB_PATHWAY	13	0.784839	1.8263	0.000913395	0.0076036	0.00564581	4219	tags=62%, list=12%, signal=54%	CDK1/CDC25C/CHEK1/CDC25A/CDK2/CDC25B/WEE1/MYT1
REACTOME_EPH_EPHRIN_MEDIATED_REPULSION_OF_CELLS	REACTOME_EPH_EPHRIN_MEDIATED_REPULSION_OF_CELLS	51	0.564437	1.765	0.000913517	0.0076036	0.00564581	2998	tags=24%, list=9%, signal=22%	EFNA2/MMP9/EPHA5/EFNB3/DNM1/EFNA5/EPHA7/EPHA3/EPHB3/EPHA6/EFNB1/EPHA4
REACTOME_REMOVAL_OF_AMINOTERMINAL_PROPEPTIDES_FROM_GAMMA_CARBOXYLATED_PROTEINS	REACTOME_REMOVAL_OF_AMINOTERMINAL_PROPEPTIDES_FROM_GAMMA_CARBOXYLATED_PROTEINS	10	-0.815682	-1.82075	0.000966576	0.00799247	0.00593456	4857	tags=60%, list=14%, signal=52%	F9/GAS6/PROS1/F7/F10/F2
WP_FIBRIN_COMPLEMENT_RECEPTOR_3_SIGNALING_PATHWAY	WP_FIBRIN_COMPLEMENT_RECEPTOR_3_SIGNALING_PATHWAY	43	-0.558509	-1.78761	0.000963764	0.00799247	0.00593456	5329	tags=40%, list=15%, signal=33%	IL12B/SRC/TLR3/REL/LBP/ITGB2/TYROBP/PLAT/FGB/ITGAM/TNF/LY96/SYK/CD14/CCL2/FGG/FGA
REACTOME_NUCLEAR_PORE_COMPLEX_NPC_DISASSEMBLY	REACTOME_NUCLEAR_PORE_COMPLEX_NPC_DISASSEMBLY	36	0.620896	1.82399	0.000979354	0.00807167	0.00599337	10286	tags=64%, list=30%, signal=45%	CCNB2/CDK1/CCNB1/NEK6/NUP188/NDC1/NUP107/NUP62/NUP85/NUP155/NUP35/NUP160/NUP58/NUP93/NUP210/RAE1/NUP205/NUP214/NUP98/TPR/NUP50/NUP153/NUP37
REACTOME_ASSEMBLY_OF_COLLAGEN_FIBRILS_AND_OTHER_MULTIMERIC_STRUCTURES	REACTOME_ASSEMBLY_OF_COLLAGEN_FIBRILS_AND_OTHER_MULTIMERIC_STRUCTURES	61	0.550014	1.79409	0.00102308	0.00840458	0.00624056	3598	tags=43%, list=10%, signal=38%	COL2A1/MMP13/COL11A1/CTSV/MMP9/MMP7/COL5A3/COL5A1/COL3A1/COL5A2/COL6A3/MMP20/COL4A2/COL8A1/COL7A1/COL4A1/PCOLCE/PXDN/COL1A2/BMP1/COL9A1/LOXL2/COL6A2/COL1A1/COL24A1/COL11A2
REACTOME_PEPTIDE_LIGAND_BINDING_RECEPTORS	REACTOME_PEPTIDE_LIGAND_BINDING_RECEPTORS	193	-0.368801	-1.51385	0.0010668	0.0087353	0.00648612	4403	tags=34%, list=13%, signal=30%	GHRL/NTSR2/ACKR4/HCRTR1/CCL5/FPR3/CCR1/CXCL6/NPY2R/EDN1/PPY/AVPR2/EDN3/CCL3L3/SSTR5/SSTR1/CCR4/NPY1R/HCRT/CXCR3/GRPR/CXCL12/NTS/NPY4R/SAA1/ACKR2/C5AR1/XCL1/GPER1/FPR2/CCL16/XK/CCL21/CCR8/CXCR6/CCKBR/NPY5R/XCL2/NMBR/CCR5/CCR2/RXFP1/SSTR3/CCR9/CCR3/CCL13/SST/TACR1/OPRK1/AGT/MC3R/CCL17/CCL11/PROKR2/CCL2/CCL7/XCR1/AVP/GPR37L1/CX3CR1/C3/CCL19/F2/NPY/PROK1
REACTOME_INTERACTION_BETWEEN_L1_AND_ANKYRINS	REACTOME_INTERACTION_BETWEEN_L1_AND_ANKYRINS	31	-0.612992	-1.80345	0.00107921	0.00880827	0.0065403	4096	tags=42%, list=12%, signal=37%	KCNQ3/SCN10A/SPTBN2/ANK3/SCN2B/KCNQ2/SCN11A/SPTBN4/NRCAM/ANK2/SCN1B/ANK1/SCN2A
REACTOME_CLASS_A_1_RHODOPSIN_LIKE_RECEPTORS	REACTOME_CLASS_A_1_RHODOPSIN_LIKE_RECEPTORS	324	-0.326281	-1.41722	0.00110756	0.00901052	0.00669048	2975	tags=25%, list=9%, signal=23%	CCL3L3/SSTR5/GPR18/SSTR1/PTAFR/CCR4/NPY1R/LPAR6/HCRT/CXCR3/CMKLR1/CYSLTR2/GRPR/GPR132/CXCL12/P2RY10/NTS/LPAR3/NPY4R/SAA1/ACKR2/C5AR1/XCL1/GPER1/FPR2/CCL16/XK/CCL21/CCR8/CYSLTR1/ADORA3/CXCR6/FFAR4/GPR17/CCKBR/GPR183/NPY5R/GPR65/DRD5/ADRB3/ADRB2/XCL2/NMBR/CCR5/CCR2/RXFP1/SSTR3/CCR9/GPR31/CCR3/CCL13/SST/TACR1/OPRK1/AGT/P2RY13/HTR1B/MC3R/CCL17/LPAR5/OXER1/GPR55/CCL11/PROKR2/CCL2/CCL7/XCR1/PTGER3/HTR2…
REACTOME_HDMS_DEMETHYLATE_HISTONES	REACTOME_HDMS_DEMETHYLATE_HISTONES	50	0.582957	1.82795	0.0011159	0.0090492	0.0067192	5563	tags=36%, list=16%, signal=30%	H3C2/H3C3/H4C5/H3C11/H3C7/H3C12/H4C9/H3C8/H4C1/H4C4/H3C14/H4C8/H3C1/H4C3/H3C10/H3C4/KDM4B/JMJD6
BIOCARTA_TCRA_PATHWAY	BIOCARTA_TCRA_PATHWAY	12	-0.798033	-1.8782	0.00112642	0.00907614	0.0067392	6654	tags=92%, list=19%, signal=74%	CD3G/CD3D/LCK/ZAP70/CD3E/CD247/CD4/HLA-DRB1/PTPRC/HLA-DRA/HLA-DRB5
BIOCARTA_CLASSIC_PATHWAY	BIOCARTA_CLASSIC_PATHWAY	14	-0.750225	-1.82484	0.00112324	0.00907614	0.0067392	2384	tags=50%, list=7%, signal=47%	C1R/C6/C9/C7/C4B/C4A/C3
KEGG_MISMATCH_REPAIR	KEGG_MISMATCH_REPAIR	23	0.700496	1.87968	0.00117092	0.00932073	0.00692081	4953	tags=57%, list=14%, signal=48%	EXO1/POLD1/LIG1/RFC4/RFC3/RFC2/MSH2/RFC5/POLD3/RPA4/PCNA/MSH6/RPA2
REACTOME_POLYMERASE_SWITCHING_ON_THE_C_STRAND_OF_THE_TELOMERE	REACTOME_POLYMERASE_SWITCHING_ON_THE_C_STRAND_OF_THE_TELOMERE	26	0.673949	1.84306	0.00116249	0.00932073	0.00692081	4091	tags=46%, list=12%, signal=41%	DSCC1/CHTF18/POLD1/PRIM1/RFC4/RFC3/RFC2/RFC5/POLA2/POLD3/PRIM2/PCNA
REACTOME_SCF_SKP2_MEDIATED_DEGRADATION_OF_P27_P21	REACTOME_SCF_SKP2_MEDIATED_DEGRADATION_OF_P27_P21	60	0.553348	1.80297	0.00117156	0.00932073	0.00692081	12211	tags=67%, list=35%, signal=43%	CCNA2/CCNE2/CKS1B/CCNE1/CDK2/RPS27A/CCNA1/PTK6/SKP2/PSMB7/PSMB5/PSMD14/PSMD1/UBA52/PSMB9/PSMA4/CDK4/PSMA5/PSMC1/PSMC3/PSMD11/PSMA6/PSMB2/PSMA1/PSMC6/PSMD2/PSMD13/PSMA3/PSMB4/PSMD4/PSME1/PSMC4/CCND1/UBC/PSME2/CDKN1A/PSMA2/PSMD5/PSMD8/PSMA7
SIG_BCR_SIGNALING_PATHWAY	SIG_BCR_SIGNALING_PATHWAY	46	-0.540864	-1.74168	0.00116666	0.00932073	0.00692081	6544	tags=35%, list=19%, signal=28%	VAV1/ITPR2/NFATC2/PIK3CD/BCL2/MAP4K1/BLNK/AKT3/CD19/PIK3R1/NR0B2/INPP5D/BTK/SYK/PTPRC/CR2
PID_AVB3_INTEGRIN_PATHWAY	PID_AVB3_INTEGRIN_PATHWAY	74	0.509306	1.71999	0.00121364	0.00962518	0.00714687	3598	tags=26%, list=10%, signal=23%	COL2A1/COL11A1/COL5A1/COL3A1/COL5A2/COL13A1/COL6A3/ITGB3/FN1/COL8A1/COL7A1/ANGPTL3/COL4A1/COL1A2/COL9A1/SDC1/COL6A2/COL1A1/COL11A2
REACTOME_INTERLEUKIN_2_FAMILY_SIGNALING	REACTOME_INTERLEUKIN_2_FAMILY_SIGNALING	44	-0.557547	-1.79224	0.00122714	0.00970173	0.00720372	7682	tags=50%, list=22%, signal=39%	PTPN6/IL5/STAT4/LCK/PIK3CD/PIK3CB/IL2/HAVCR2/IL15/CSF2RB/PIK3R1/IL2RG/STAT5B/JAK3/IL5RA/INPP5D/IL2RB/STAT5A/CSF2/CSF2RA/SYK/IL3
REACTOME_ANTIMICROBIAL_PEPTIDES	REACTOME_ANTIMICROBIAL_PEPTIDES	82	-0.455808	-1.65349	0.00125019	0.00985309	0.0073161	2740	tags=30%, list=8%, signal=28%	DEFB121/CLU/BPIFA2/TLR2/RNASE6/S100A7/CD4/BPIFB2/LYZ/PGLYRP3/DCD/PRSS2/DEFB1/PI3/CCR2/LTF/CAMP/HTN1/DEFB119/PGLYRP2/CTSG/REG3G/LCN2/SEMG1/PLA2G2A
REACTOME_MOLECULES_ASSOCIATED_WITH_ELASTIC_FIBRES	REACTOME_MOLECULES_ASSOCIATED_WITH_ELASTIC_FIBRES	37	0.615189	1.80248	0.00125691	0.00987514	0.00733248	5334	tags=46%, list=15%, signal=39%	BMP7/ELN/MFAP2/ITGB3/FN1/FBN2/EMILIN1/LTBP2/MFAP5/GDF5/LTBP1/TGFB3/EMILIN3/ITGB8/EMILIN2/TGFB2/FBN1
WP_MIRNA_TARGETS_IN_ECM_AND_MEMBRANE_RECEPTORS	WP_MIRNA_TARGETS_IN_ECM_AND_MEMBRANE_RECEPTORS	32	0.639335	1.83171	0.00126203	0.00988459	0.00733949	5574	tags=47%, list=16%, signal=39%	COL5A3/COL5A1/COL3A1/COL5A2/COL6A3/LAMA4/COL4A2/FN1/COL4A1/COL1A2/COL6A2/MIR219A1/THBS2/LAMC1/MIR25
REACTOME_NON_INTEGRIN_MEMBRANE_ECM_INTERACTIONS	REACTOME_NON_INTEGRIN_MEMBRANE_ECM_INTERACTIONS	59	0.537152	1.73652	0.00130857	0.0102174	0.0075866	3673	tags=31%, list=11%, signal=27%	COL2A1/LAMA1/TNC/COL11A1/COL5A3/COL5A1/COL3A1/COL5A2/LAMA4/COL4A2/ITGB3/FN1/COL4A1/COL1A2/SDC1/COL1A1/COL11A2/LAMA2
REACTOME_INTERFERON_GAMMA_SIGNALING	REACTOME_INTERFERON_GAMMA_SIGNALING	91	-0.457576	-1.68764	0.00133504	0.0103919	0.00771619	4337	tags=30%, list=13%, signal=26%	IRF8/TRIM68/HLA-E/HLA-B/GBP4/CAMK2D/HLA-A/IFNGR1/PTAFR/IRF5/CIITA/TRIM31/IRF6/GBP2/IRF4/TRIM29/HLA-DRB1/CAMK2A/HLA-DQB2/HLA-DQB1/HLA-DPB1/HLA-DQA1/HLA-DRA/HLA-DPA1/HLA-DQA2/HLA-DRB5/GBP7
REACTOME_MET_ACTIVATES_PTK2_SIGNALING	REACTOME_MET_ACTIVATES_PTK2_SIGNALING	30	0.645228	1.8209	0.00135549	0.0105186	0.00781024	3673	tags=47%, list=11%, signal=42%	COL2A1/LAMA1/COL11A1/COL5A3/COL5A1/COL3A1/COL5A2/LAMA4/FN1/COL1A2/COL1A1/COL24A1/COL11A2/LAMA2
BIOCARTA_CTLA4_PATHWAY	BIOCARTA_CTLA4_PATHWAY	20	-0.70605	-1.86342	0.00139299	0.0107435	0.00797724	6654	tags=65%, list=19%, signal=52%	CD3G/CD3D/LCK/IL2/CD86/CTLA4/PIK3R1/CD3E/CD247/ITK/HLA-DRB1/HLA-DRA/HLA-DRB5
KEGG_ARACHIDONIC_ACID_METABOLISM	KEGG_ARACHIDONIC_ACID_METABOLISM	58	-0.503185	-1.71729	0.00139195	0.0107435	0.00797724	3669	tags=40%, list=11%, signal=35%	ALOX15/CYP4F2/CYP2J2/EPHX2/GPX3/PLA2G2F/ALOX5/PLA2G4E/TBXAS1/CYP4A11/CYP2U1/GPX5/CYP2C8/PLA2G3/PLA2G2C/PTGS1/AKR1C3/PLA2G2D/CYP4A22/HPGDS/PLA2G2A/GGT6/PTGDS
REACTOME_FORMATION_OF_SENESCENCE_ASSOCIATED_HETEROCHROMATIN_FOCI_SAHF	REACTOME_FORMATION_OF_SENESCENCE_ASSOCIATED_HETEROCHROMATIN_FOCI_SAHF	17	0.741411	1.86496	0.00142028	0.0108874	0.00808406	3839	tags=41%, list=11%, signal=37%	HMGA2/H1-5/LMNB1/H1-4/H1-2/H1-3/HMGA1
REACTOME_G1_S_DNA_DAMAGE_CHECKPOINTS	REACTOME_G1_S_DNA_DAMAGE_CHECKPOINTS	68	0.533464	1.77446	0.001416	0.0108874	0.00808406	8037	tags=38%, list=23%, signal=29%	CCNA2/CHEK1/CDC25A/PSMA8/CCNE2/CDKN2A/CCNE1/CDK2/PSME4/CHEK2/RPS27A/CCNA1/PSMB7/PSMB5/PSMD14/PSMD1/UBA52/PSMB9/PSMA4/PSMA5/PSMC1/PSMC3/PSMD11/PSMA6/PSMB2/PSMA1
REACTOME_CILIUM_ASSEMBLY	REACTOME_CILIUM_ASSEMBLY	199	0.403681	1.54224	0.00144127	0.0110148	0.00817871	7732	tags=30%, list=22%, signal=23%	NEK2/PLK1/CDK1/TUBA3C/TUBB2B/MCHR1/TUBB6/PLK4/HAUS8/CNGA2/TUBB2A/TUBB3/RHO/TUBB4B/CEP152/TUBB/CEP72/CCT2/NDE1/ODF2/CENPJ/HAUS7/HAUS1/CEP164/DYNC2I2/KIF24/HSPB11/CEP89/TUBA1B/PPP2R1A/CCT4/TUBB1/CEP57/PDE6D/SEPTIN2/CNTRL/TUBA1C/TUBA8/DCTN2/INPP5E/NPHP4/HAUS2/CSNK1E/DCTN3/CEP76/TUBA3D/IQCB1/HAUS6/PCNT/KIF3C/CEP131/CDK5RAP2/MAPRE1/CCT3/TUBG1/HAUS5/RAB8A/ATAT1/TUBB8
WP_THYROID_HORMONES_PRODUCTION_AND_PERIPHERAL_DOWNSTREAM_SIGNALING_EFFECTS	WP_THYROID_HORMONES_PRODUCTION_AND_PERIPHERAL_DOWNSTREAM_SIGNALING_EFFECTS	93	-0.440369	-1.62439	0.00149163	0.0113652	0.00843889	1245	tags=13%, list=4%, signal=12%	SLC16A10/TBC1D4/ADRB3/PFKFB2/THRB/DUOXA2/FGF21/ADCY8/KLB/PPARGC1A/DUOX2/NPY
WP_EFFECT_OF_PROGERIN_ON_GENES_INVOLVED_IN_HUTCHINSONGILFORD_PROGERIA_SYNDROME	WP_EFFECT_OF_PROGERIN_ON_GENES_INVOLVED_IN_HUTCHINSONGILFORD_PROGERIA_SYNDROME	37	0.611118	1.79055	0.00150336	0.0114201	0.00847962	6598	tags=41%, list=19%, signal=33%	H3C2/H3C3/H3C11/H3C7/E2F1/H3C12/H3C8/H3C14/H3C1/SUV39H1/H3C10/MBD3/H3C4/CBX3/HDAC2
REACTOME_ACTIVATION_OF_GENE_EXPRESSION_BY_SREBF_SREBP	REACTOME_ACTIVATION_OF_GENE_EXPRESSION_BY_SREBF_SREBP	42	0.595803	1.78665	0.00151683	0.0114578	0.00850763	3994	tags=33%, list=12%, signal=30%	FDPS/HMGCS1/MVD/SQLE/IDI1/FDFT1/MVK/DHCR7/FASN/HMGCR/SC5D/SCD/CYP51A1/LSS
REACTOME_RNA_POLYMERASE_II_TRANSCRIPTION_TERMINATION	REACTOME_RNA_POLYMERASE_II_TRANSCRIPTION_TERMINATION	67	0.525084	1.74882	0.00151741	0.0114578	0.00850763	12425	tags=70%, list=36%, signal=45%	DDX39A/ALYREF/SARNP/EIF4A3/SYMPK/NCBP1/THOC3/SNRPG/SNRPE/ZNF473/CSTF3/THOC5/CPSF1/CPSF3/SRSF7/U2AF1/SRSF3/NUDT21/SRSF2/U2AF1L4/SNRPF/SRSF9/POLDIP3/CHTOP/MAGOH/PAPOLA/LSM11/PABPN1/SRSF11/SNRPB/SLBP/SNRPD3/RBM8A/CPSF4/CPSF7/SRRM1/LUZP4/CPSF6/DDX39B/RNPS1/CSTF1/U2AF2/LSM10/SRSF1/MAGOHB/DHX38/SRSF4
REACTOME_INTERACTIONS_OF_REV_WITH_HOST_CELLULAR_PROTEINS	REACTOME_INTERACTIONS_OF_REV_WITH_HOST_CELLULAR_PROTEINS	37	0.610547	1.78888	0.00153622	0.0115652	0.00858737	10286	tags=68%, list=30%, signal=47%	RCC1/RAN/NUP188/RANBP1/NDC1/NUP107/NUP62/NUP85/NUP155/RANGAP1/KPNB1/XPO1/NUP35/NUP160/NUP58/NUP93/NUP210/RAE1/NUP205/NUP214/NUP98/TPR/NUP50/NUP153/NUP37
REACTOME_NS1_MEDIATED_EFFECTS_ON_HOST_PATHWAYS	REACTOME_NS1_MEDIATED_EFFECTS_ON_HOST_PATHWAYS	41	0.601591	1.79795	0.0015447	0.0115945	0.0086091	10480	tags=68%, list=30%, signal=48%	KPNA2/ISG15/NUP188/NDC1/KPNA5/NUP107/KPNA7/NUP62/NUP85/NUP155/KPNB1/NUP35/NUP160/NUP58/NUP93/NUP210/EIF2AK2/RAE1/NUP205/NUP214/NUP98/TPR/PABPN1/NUP50/KPNA3/NUP153/NUP37/CPSF4
REACTOME_G_ALPHA_I_SIGNALLING_EVENTS	REACTOME_G_ALPHA_I_SIGNALLING_EVENTS	309	-0.326756	-1.41334	0.00158911	0.0118924	0.0088303	5149	tags=29%, list=15%, signal=25%	GPSM3/SRC/RGS5/HEBP1/P2RY14/RGSL1/PSAP/NMUR1/TAS2R7/ADCY6/RGS10/TAS2R3/GNG11/CCL5/GNAL/CCL4L2/FPR3/CCR1/CXCL6/RGS7/NPY2R/PPY/RGS1/CAMK2D/ADCY7/GNA15/PRKCA/GNA14/SSTR5/GPR18/SSTR1/GABBR2/RGS8/CCR4/NPY1R/CXCR3/GNG7/PLCB2/CXCL12/LPAR3/NPY4R/SAA1/PDE4A/RGS18/C5AR1/GPER1/FPR2/CCL16/CCL21/PRKACG/CCR8/TAS1R2/GRM8/ADORA3/CXCR6/ADCY5/GPR17/GPR183/NPY5R/CAMK2A/CCR5/CCR2/SSTR3/CCR9/GPR31/CCR3/CCL13/SST/OPRK…
REACTOME_INHIBITION_OF_THE_PROTEOLYTIC_ACTIVITY_OF_APC_C_REQUIRED_FOR_THE_ONSET_OF_ANAPHASE_BY_MITOTIC_SPINDLE_CHECKPOINT_COMPONENTS	REACTOME_INHIBITION_OF_THE_PROTEOLYTIC_ACTIVITY_OF_APC_C_REQUIRED_FOR_THE_ONSET_OF_ANAPHASE_BY_MITOTIC_SPINDLE_CHECKPOINT_COMPONENTS	21	0.69891	1.85688	0.00159771	0.0119214	0.00885184	1796	tags=24%, list=5%, signal=23%	CDC20/UBE2C/BUB1B/UBE2S/MAD2L1
WP_BIOGENIC_AMINE_SYNTHESIS	WP_BIOGENIC_AMINE_SYNTHESIS	15	-0.737287	-1.8346	0.00167683	0.0124382	0.00923557	3906	tags=53%, list=11%, signal=47%	PNMT/ACHE/DBH/DDC/MAOA/CHAT/PAH/HDC
PID_INTEGRIN2_PATHWAY	PID_INTEGRIN2_PATHWAY	28	-0.62605	-1.80933	0.00167353	0.0124382	0.00923557	3641	tags=36%, list=11%, signal=32%	ITGB2/F10/ITGAL/PLAT/FGB/ITGAM/CD40LG/C3/FGG/FGA
REACTOME_CELL_SURFACE_INTERACTIONS_AT_THE_VASCULAR_WALL	REACTOME_CELL_SURFACE_INTERACTIONS_AT_THE_VASCULAR_WALL	194	-0.369337	-1.5153	0.00170053	0.012577	0.00933862	5481	tags=32%, list=16%, signal=27%	JAM3/PIK3CB/PSG6/IGLV6-57/SRC/SDC2/VPREB1/IGHV3-13/MIF/IGLV1-40/GAS6/PSG2/IGKV2-28/PROS1/IGHV4-34/SIRPA/ANGPT1/CD244/ITGB2/GRB7/BSG/IGKV1D-33/GYPA/PIK3R1/ATP1B1/ATP1B2/CD84/INPP5D/PSG11/CD2/TEK/PSG1/ITGAL/CD48/IGHV4-59/MERTK/ITGAM/TNFRSF10D/SDC4/SELPLG/JAML/SPN/IGKV1-16/IGHM/SELP/IGKV1-39/IGHV1-46/CD74/IGKV1D-12/PSG7/IGLV3-27/OLR1/IGKV1-17/PSG5/IGHA2/GRB14/IGHA1/GYPB/IGLV7-43/PSG4/PSG8/PSG9/F2
REACTOME_INOSITOL_PHOSPHATE_METABOLISM	REACTOME_INOSITOL_PHOSPHATE_METABOLISM	48	-0.527812	-1.71455	0.00176469	0.0130133	0.0096626	8255	tags=40%, list=24%, signal=30%	INPP1/ITPKA/PLCB3/OCRL/PLCB1/NUDT4/PLCH2/PPIP5K1/IMPA2/PLCZ1/PLCD1/PLCE1/INPP5D/PLCB2/PLCH1/NUDT11/INPP4B/PLD4/IP6K3
REACTOME_CYTOCHROME_P450_ARRANGED_BY_SUBSTRATE_TYPE	REACTOME_CYTOCHROME_P450_ARRANGED_BY_SUBSTRATE_TYPE	64	-0.495128	-1.71248	0.00177134	0.0130242	0.00967075	3621	tags=38%, list=11%, signal=34%	CYP4F2/CYP27A1/CYP2J2/CYP2S1/TBXAS1/CYP4V2/CYP4A11/CYP11B1/CYP7A1/CYP2U1/CYP4F22/CYP8B1/CYP2C8/CYP2A6/CYP2F1/CYP7B1/CYP3A5/CYP4A22/CYP4F12/CYP3A7/CYP4B1/CYP4F11/CYP11B2/CYP3A4
BIOCARTA_ASBCELL_PATHWAY	BIOCARTA_ASBCELL_PATHWAY	13	-0.751725	-1.81174	0.00186318	0.0135807	0.0100839	4674	tags=62%, list=14%, signal=53%	IL2/FASLG/CD40/CD4/CD40LG/HLA-DRB1/HLA-DRA/HLA-DRB5
REACTOME_SIGNALING_BY_ERBB2_IN_CANCER	REACTOME_SIGNALING_BY_ERBB2_IN_CANCER	26	-0.63021	-1.78939	0.00186033	0.0135807	0.0100839	4650	tags=35%, list=14%, signal=30%	GAB1/NRG3/PIK3R1/NRG2/NRG1/BTC/EGF/ERBB4/ERBB3
WP_PYRIMIDINE_METABOLISM	WP_PYRIMIDINE_METABOLISM	83	0.498166	1.68637	0.00185829	0.0135807	0.0100839	7522	tags=36%, list=22%, signal=28%	RRM2/TK1/TYMS/POLE2/DTYMK/POLD1/ENPP3/POLR1E/PRIM1/RRM1/CAD/POLA2/UCK2/POLD3/PRIM2/POLR3D/POLE/NT5M/POLE4/POLE3/POLR2D/NT5C/CMPK1/POLR2G/POLA1/NME4/POLR2L/DUT/POLD2/PNPT1
REACTOME_FATTY_ACIDS	REACTOME_FATTY_ACIDS	15	-0.733066	-1.8241	0.00191496	0.0138951	0.0103174	4154	tags=67%, list=12%, signal=59%	CYP4F8/CYP4F2/CYP2J2/CYP4A11/CYP4F22/CYP2F1/CYP4A22/CYP4F12/CYP4B1/CYP4F11
REACTOME_TP53_REGULATES_TRANSCRIPTION_OF_GENES_INVOLVED_IN_G2_CELL_CYCLE_ARREST	REACTOME_TP53_REGULATES_TRANSCRIPTION_OF_GENES_INVOLVED_IN_G2_CELL_CYCLE_ARREST	18	0.700233	1.79415	0.00191733	0.0138951	0.0103174	5706	tags=50%, list=17%, signal=42%	SFN/CDK1/CDC25C/CCNB1/AURKA/RBL1/PCNA/TFDP1/GADD45A
REACTOME_ACTIVATION_OF_THE_MRNA_UPON_BINDING_OF_THE_CAP_BINDING_COMPLEX_AND_EIFS_AND_SUBSEQUENT_BINDING_TO_43S	REACTOME_ACTIVATION_OF_THE_MRNA_UPON_BINDING_OF_THE_CAP_BINDING_COMPLEX_AND_EIFS_AND_SUBSEQUENT_BINDING_TO_43S	60	0.541417	1.7641	0.00194381	0.0140467	0.0104299	10904	tags=73%, list=32%, signal=50%	EIF4EBP1/RPS27A/EIF2S1/RPS19/RPS7/RPS5/RPS18/RPS3/RPS2/RPS12/RPS8/RPS10/RPS16/RPS26/RPS29/RPS24/RPS25/EIF3J/RPS6/RPS13/RPS9/EIF3M/PABPC1/RPS3A/RPS11/RPS15/EIF3F/RPS27/RPS21/RPS15A/RPS17/EIF3L/EIF3H/EIF3D/RPS28/EIF3G/EIF2S3/EIF2S2/RPSA/EIF3B/EIF3E/RPS14/EIF3I/EIF4A1
REACTOME_SUMOYLATION_OF_DNA_DAMAGE_RESPONSE_AND_REPAIR_PROTEINS	REACTOME_SUMOYLATION_OF_DNA_DAMAGE_RESPONSE_AND_REPAIR_PROTEINS	77	0.498775	1.68752	0.00197101	0.0142025	0.0105457	11158	tags=58%, list=32%, signal=40%	BLM/BRCA1/CBX2/CDKN2A/EID3/NUP188/NDC1/NUP107/NUP62/PHC2/NUP85/NUP155/TDG/MDC1/CBX8/SUMO1/SMC5/RNF2/HDAC7/SMC1A/NUP35/RNF168/SUMO2/NUP160/NUP58/NUP93/SMC6/PARP1/PIAS4/NUP210/RAE1/SUMO3/WRN/NUP205/NUP214/NUP98/TPR/NUP50/NUP153/NUP37/NSMCE4A/SCMH1/SMC3/PHC1/NUP54
REACTOME_RESOLUTION_OF_ABASIC_SITES_AP_SITES	REACTOME_RESOLUTION_OF_ABASIC_SITES_AP_SITES	38	0.612145	1.81045	0.00200868	0.0144327	0.0107165	9119	tags=58%, list=26%, signal=43%	POLE2/FEN1/POLD1/LIG1/RFC4/RFC3/RFC2/RFC5/POLD3/PCNA/POLE/POLE4/PARP2/RPA2/POLE3/RPA3/TDG/POLD2/MUTYH/PARP1/SMUG1/NTHL1
REACTOME_PARACETAMOL_ADME	REACTOME_PARACETAMOL_ADME	28	-0.620393	-1.79298	0.00202694	0.0145226	0.0107833	3878	tags=32%, list=11%, signal=29%	NAT1/UGT2B15/SULT1E1/UGT1A6/GSTM1/ABCG2/UGT1A9/GGT6/UGT1A1
BIOCARTA_COMP_PATHWAY	BIOCARTA_COMP_PATHWAY	19	-0.678711	-1.76923	0.00208943	0.0149279	0.0110842	2384	tags=47%, list=7%, signal=44%	C1R/CFD/C6/C9/C7/C4B/C4A/C3/MASP1
WP_FOXA2_PATHWAY	WP_FOXA2_PATHWAY	21	0.693305	1.84199	0.00210158	0.0149392	0.0110926	3283	tags=33%, list=10%, signal=30%	FOXA2/SLCO1B1/APOB/FOXA1/FASN/INS/ABCC2
KEGG_FC_EPSILON_RI_SIGNALING_PATHWAY	KEGG_FC_EPSILON_RI_SIGNALING_PATHWAY	79	-0.454847	-1.64031	0.00210286	0.0149392	0.0110926	6739	tags=39%, list=20%, signal=32%	PRKCD/MAPK9/VAV1/VAV3/PLA2G4B/PIK3CD/FCER1G/LAT/PIK3CB/FCER1A/PLA2G12A/AKT3/LCP2/PIK3R1/PRKCA/PLA2G2F/PIK3CG/PLA2G4E/PIK3R5/INPP5D/MAPK10/CSF2/TNF/BTK/PLA2G3/PLA2G2C/SYK/IL3/PLA2G2D/PLA2G2A/MS4A2
REACTOME_SYNTHESIS_OF_BILE_ACIDS_AND_BILE_SALTS_VIA_27_HYDROXYCHOLESTEROL	REACTOME_SYNTHESIS_OF_BILE_ACIDS_AND_BILE_SALTS_VIA_27_HYDROXYCHOLESTEROL	15	-0.728758	-1.81338	0.00213383	0.0150944	0.0112079	4106	tags=60%, list=12%, signal=53%	HSD3B7/CYP27A1/CYP7A1/AKR1C1/CYP8B1/AKR1C2/CYP7B1/AKR1C3/AKR1D1
REACTOME_TRANSCRIPTION_OF_E2F_TARGETS_UNDER_NEGATIVE_CONTROL_BY_DREAM_COMPLEX	REACTOME_TRANSCRIPTION_OF_E2F_TARGETS_UNDER_NEGATIVE_CONTROL_BY_DREAM_COMPLEX	19	0.695383	1.79476	0.00213667	0.0150944	0.0112079	5106	tags=47%, list=15%, signal=40%	TOP2A/CDC25A/CDC6/E2F1/LIN9/RBL1/MYC/PCNA/TFDP1
REACTOME_PEPTIDE_HORMONE_METABOLISM	REACTOME_PEPTIDE_HORMONE_METABOLISM	91	0.494216	1.70511	0.00214577	0.0151163	0.0112241	2738	tags=22%, list=8%, signal=20%	ISL1/LHB/CGA/ACE2/GIP/FFAR1/GNG13/GCG/GNAT3/REN/GNB3/INHBE/LEP/INHBC/PAX6/INHA/CGB3/ENPEP/GATA4/BCHE
KEGG_AUTOIMMUNE_THYROID_DISEASE	KEGG_AUTOIMMUNE_THYROID_DISEASE	48	-0.523134	-1.69935	0.00216168	0.015186	0.0112759	4055	tags=38%, list=12%, signal=33%	CD86/FASLG/HLA-E/HLA-B/CTLA4/HLA-A/CD40/HLA-DMA/CD40LG/HLA-DRB1/HLA-DQB1/HLA-DPB1/HLA-DQA1/HLA-DRA/HLA-DPA1/HLA-DQA2/HLA-DOA/HLA-DRB5
WP_LIPID_PARTICLES_COMPOSITION	WP_LIPID_PARTICLES_COMPOSITION	10	0.812506	1.79292	0.00220204	0.0151876	0.0112771	1647	tags=50%, list=5%, signal=48%	APOA1/APOA2/APOB/LPL/LDLR
REACTOME_TRANSPORT_OF_MATURE_MRNAS_DERIVED_FROM_INTRONLESS_TRANSCRIPTS	REACTOME_TRANSPORT_OF_MATURE_MRNAS_DERIVED_FROM_INTRONLESS_TRANSCRIPTS	43	0.574828	1.73307	0.00219445	0.0151876	0.0112771	10480	tags=60%, list=30%, signal=42%	NUP188/ALYREF/NDC1/NUP107/NUP62/NUP85/NUP155/SYMPK/NCBP1/CPSF1/CPSF3/NUP35/NUP160/NUP58/NUP93/NUP210/RAE1/NUP205/NUP214/NUP98/TPR/NUP50/SLBP/NUP153/NUP37/CPSF4
KEGG_PROGESTERONE_MEDIATED_OOCYTE_MATURATION	KEGG_PROGESTERONE_MEDIATED_OOCYTE_MATURATION	85	0.48952	1.66472	0.00219584	0.0151876	0.0112771	3152	tags=24%, list=9%, signal=21%	CCNB2/PLK1/CDK1/PKMYT1/CCNA2/BUB1/CDC25C/CDC25A/CCNB1/ADCY1/MAPK12/MAD2L1/PDE3B/MAPK11/CDK2/CDC25B/MAD2L2/PGR/INS/SPDYC
REACTOME_INTEGRIN_CELL_SURFACE_INTERACTIONS	REACTOME_INTEGRIN_CELL_SURFACE_INTERACTIONS	84	0.487056	1.65103	0.00217966	0.0151876	0.0112771	3333	tags=30%, list=10%, signal=27%	COL2A1/ICAM5/TNC/IBSP/COL5A3/COMP/COL5A1/COL3A1/COL5A2/COL13A1/COL6A3/COL4A2/ITGB3/LUM/FN1/COL8A1/COL7A1/ITGA2B/ITGA7/COL4A1/COL1A2/COL9A1/COL6A2/COL1A1/COL23A1
REACTOME_EPH_EPHRIN_SIGNALING	REACTOME_EPH_EPHRIN_SIGNALING	92	0.46803	1.62375	0.00218093	0.0151876	0.0112771	9049	tags=42%, list=26%, signal=31%	EFNA2/MMP9/EPHA5/EFNB3/NGEF/DNM1/EFNA5/EPHA7/EPHA3/GRIN1/EPHB3/EPHA6/EFNB1/EPHA4/ARPC1B/ARPC2/VAV2/LIMK1/ACTR3/CLTB/PSEN2/EPHB2/YES1/ACTR2/HRAS/CFL1/CLTCL1/AP2S1/EFNB2/GRIN2B/MYH9/PAK1/CLTA/MYL6/MYH10/EFNA3/EFNA4/CDC42/ADAM10
REACTOME_CELLULAR_RESPONSE_TO_STARVATION	REACTOME_CELLULAR_RESPONSE_TO_STARVATION	156	0.423861	1.58055	0.00220407	0.0151876	0.0112771	9574	tags=51%, list=28%, signal=37%	ATP6V1B1/ATP6V1G3/ATP6V0D2/RPL39L/RPS27A/RPLP0/EIF2S1/RPL37A/RPS19/RPS7/RPS5/RPS18/RPS3/RPL7A/RPL27A/RPS2/RPL13A/CASTOR1/ATP6V1C2/RPL18A/RPS12/RPL35/RPS8/RPTOR/RPL10L/RPL17/RPL18/RPS10/ATF3/RPL36/RPL31/RPL11/RPS16/RPL28/RPS26/RPS29/RPS24/RPL41/UBA52/CASTOR2/RPS25/RPL36A/RPLP2/TRIB3/ATP6V0B/RPS6/RPS13/RPS9/RPL22L1/GCN1/RPL8/RPL7/RPS3A/RPS11/RPS15/SH3BP4/RPL23A/RPL12/RPS27/RPL30/KPTN/RPS21/RPL10A/R…
REACTOME_DISEASES_OF_GLYCOSYLATION	REACTOME_DISEASES_OF_GLYCOSYLATION	143	0.428758	1.57935	0.00219627	0.0151876	0.0112771	6605	tags=34%, list=19%, signal=28%	ADAMTS19/ACAN/NCAN/ADAMTS2/THSD7B/ADAMTS4/LUM/MUC1/ADAMTS12/ADAMTS20/ADAMTS14/MUC13/DCN/GPC2/GALNT12/ADAMTS6/MUC5B/ADAMTS1/SDC1/SBSPON/CFP/SSPOP/ADAMTS5/CSPG5/ADAMTS9/MUC12/ST3GAL3/GPC6/GALE/CSPG4/CHSY1/DPM2/MUC21/POMT2/ADAMTS13/MUC3A/THBS2/SEMA5B/ADAMTS3/MGAT2/DHDDS/B4GALT1/NOTCH3/SPON2/ALG9/MOGS/GALK1/POMT1/MAN1B1
REACTOME_ION_HOMEOSTASIS	REACTOME_ION_HOMEOSTASIS	54	-0.513519	-1.72569	0.00221535	0.0152237	0.0113039	3728	tags=37%, list=11%, signal=33%	SLC8A1/FXYD2/CAMK2D/FXYD6/ATP1B1/CASQ2/ATP1B2/ATP2A3/ATP2B3/FXYD1/CASQ1/CLIC2/FXYD4/CAMK2A/FXYD7/KCNJ11/PLN/NOS1/ATP1A4/TRDN
WP_CHEMOKINE_SIGNALING_PATHWAY	WP_CHEMOKINE_SIGNALING_PATHWAY	164	-0.37165	-1.49299	0.00222297	0.0152346	0.011312	6570	tags=32%, list=19%, signal=26%	CCR6/PLCB1/VAV1/CXCL5/VAV3/GNGT2/IKBKB/DOCK2/PIK3CD/SHC2/CCL4/NFKBIA/PIK3CB/CXCL16/WASL/ADCY6/GNG11/CCL5/AKT3/CCR1/NCF1/ADCY7/PIK3R1/WAS/ELMO1/PIK3CG/STAT5B/PIK3R5/JAK3/CCR4/CXCR3/GNG7/PLCB2/CXCL12/XCL1/CCL21/PRKACG/CCR8/CXCR6/ADCY5/ITK/CCR2/CXCL14/CCR9/CCR3/CCL17/CCL11/CCL7/XCR1/ADCY8/CX3CR1/ADCY2/CCL19
WP_CCL18_SIGNALING_PATHWAY	WP_CCL18_SIGNALING_PATHWAY	51	0.542717	1.69708	0.00223303	0.0152621	0.0113324	5413	tags=35%, list=16%, signal=30%	HOTAIR/MMP9/LINC00974/TFAP2A/VEGFC/FN1/TEAD4/COL1A2/SLC2A1/MYC/ATE1-AS1/PPM1K-DT/VIM/LDHA/FZD4/STAT1/VCAM1/ATF3
KEGG_HISTIDINE_METABOLISM	KEGG_HISTIDINE_METABOLISM	29	-0.605816	-1.74583	0.00225076	0.0153416	0.0113914	2871	tags=38%, list=8%, signal=35%	ALDH3B1/ALDH2/ALDH3A1/FTCD/HNMT/DDC/MAOA/MAOB/ALDH3B2/ACY3/HDC
PID_P53_DOWNSTREAM_PATHWAY	PID_P53_DOWNSTREAM_PATHWAY	137	0.423431	1.5534	0.0022583	0.0153515	0.0113988	7497	tags=34%, list=22%, signal=26%	TP73/TYRP1/POU4F1/SFN/E2F2/CCNB1/DKK1/FOXA1/E2F1/LIF/VDR/DUSP5/NDRG1/DDIT4/BDKRB2/BCL2A1/MSH2/SERPINE1/PERP/AIFM2/PCNA/STEAP3/HIC1/TP53I3/BTG2/SCN3B/BAK1/TFDP1/SERPINB5/MAP4K4/ATF3/CSE1L/BCL2L14/GADD45A/CASP1/E2F3/HDAC2/TAF9/PIDD1/POU4F2/APAF1/BAX/ARID3A/TNFRSF10A/JUN/RGCC
WP_B_CELL_RECEPTOR_SIGNALING_PATHWAY	WP_B_CELL_RECEPTOR_SIGNALING_PATHWAY	97	-0.425437	-1.57412	0.00226749	0.0153726	0.0114144	6739	tags=30%, list=20%, signal=24%	PRKCD/MAPK9/VAV1/LCK/NFATC2/IKBKB/SH3BP2/PIP5K1B/NFKBIA/CD79A/HCLS1/MAP4K1/GAB1/REL/BLNK/LAT2/MEF2C/CD19/PIK3R1/PIK3CG/INPP5D/BTK/IRF4/DAPP1/SYK/CAMK2A/PTPRC/PIK3AP1/CR2
REACTOME_ION_TRANSPORT_BY_P_TYPE_ATPASES	REACTOME_ION_TRANSPORT_BY_P_TYPE_ATPASES	55	-0.492563	-1.66326	0.00227723	0.0153972	0.0114327	3597	tags=38%, list=10%, signal=34%	ATP13A5/FXYD2/CAMK2D/FXYD6/ATP8B1/ATP1B1/ATP1B2/ATP2A3/ATP9A/ATP2B3/ATP12A/FXYD1/ATP10B/ATP8B4/ATP8A2/FXYD4/CAMK2A/FXYD7/PLN/ATP1A4/ATP10A
KEGG_CHEMOKINE_SIGNALING_PATHWAY	KEGG_CHEMOKINE_SIGNALING_PATHWAY	187	-0.362905	-1.48987	0.00229915	0.0155039	0.0115119	6570	tags=34%, list=19%, signal=27%	CCR6/PLCB1/VAV1/CXCL5/PF4V1/VAV3/GNGT2/IKBKB/DOCK2/PIK3CD/SHC2/CCL4/NFKBIA/PIK3CB/CXCL16/WASL/ADCY6/GNG11/CCL5/CCL4L2/AKT3/CCR1/CXCL6/NCF1/ADCY7/PIK3R1/WAS/ELMO1/CCL3L3/PIK3CG/STAT5B/PIK3R5/JAK3/CCR4/CXCR3/GNG7/PLCB2/CXCL12/XCL1/CCL16/CCL21/PRKACG/CCR8/CCL14/CXCR6/ADCY5/ITK/XCL2/CCR5/CCR2/CXCL14/CCR9/CCR3/CCL13/CCL17/CCL11/CCL2/CCL7/XCR1/ADCY8/CX3CR1/ADCY2/CCL19
WP_DOPAMINERGIC_NEUROGENESIS	WP_DOPAMINERGIC_NEUROGENESIS	30	0.627786	1.77168	0.0023281	0.0156572	0.0116258	3842	tags=43%, list=11%, signal=39%	FOXA2/LMX1B/GBX2/NKX2-2/EN2/SOX2/GLI2/NEUROG2/GLI1/EN1/NEUROD1/PITX3/FGF8
WP_BASE_EXCISION_REPAIR	WP_BASE_EXCISION_REPAIR	31	0.613099	1.7462	0.00236961	0.015894	0.0118016	9576	tags=58%, list=28%, signal=42%	NEIL3/POLE2/FEN1/POLD1/LIG1/POLD3/PCNA/POLE/POLE4/PARP2/POLE3/TDG/POLD2/MUTYH/PARP1/SMUG1/NTHL1/HMGB1
BIOCARTA_RANMS_PATHWAY	BIOCARTA_RANMS_PATHWAY	10	0.809774	1.7869	0.0023782	0.0159093	0.011813	5815	tags=90%, list=17%, signal=75%	KIF15/TPX2/AURKA/KPNA2/RCC1/RAN/RANBP1/RANGAP1/KPNB1
REACTOME_SIGNALING_BY_NUCLEAR_RECEPTORS	REACTOME_SIGNALING_BY_NUCLEAR_RECEPTORS	296	0.365445	1.4474	0.00241767	0.0161306	0.0119773	5539	tags=25%, list=16%, signal=21%	H3C2/H2AC14/H3C3/GNG13/MMP9/MMP7/H2AC4/GNAT3/SPHK1/GNB3/PCK1/H2BC14/RXRG/H2BC7/AREG/H2BC17/H2BC8/FOXA1/H4C5/H2BC4/H3C11/CYP26B1/KPNA2/H3C7/ALDH1A3/H3C12/H2BC11/GNG8/H2AX/H2BC10/H2BC12/GATA3/H4C9/GREB1/FABP5/TFF1/ANGPTL3/H3C8/H4C1/FASN/H2BC9/H4C4/H2BC6/H3C14/H2AC8/PGR/MYC/S1PR3/H4C8/PDK1/CPT1B/SCD/H2BC13/H2AZ1/H3C1/RDH16/CRABP2/NR1H3/CRABP1/NRAS/ABCG5/CBFB/FOSB/AGO2/H4C3/H3C10/H2AC6/PLIN1/EPGN/POL…
PID_TCR_PATHWAY	PID_TCR_PATHWAY	64	-0.484452	-1.67555	0.00248135	0.0165118	0.0122603	6654	tags=39%, list=19%, signal=32%	CD3G/TRAF6/VAV1/CD3D/LCK/IKBKB/SH3BP2/SLA2/LAT/MAP4K1/RASGRP1/ZAP70/CD86/LCP2/PRKCA/WAS/CD3E/CD247/TRPV6/CD4/GRAP2/ITK/FYB1/PTPRC/HLA-DRA
PID_IL12_2PATHWAY	PID_IL12_2PATHWAY	62	-0.481556	-1.65719	0.00250481	0.016624	0.0123437	6773	tags=48%, list=20%, signal=39%	RAB7A/STAT4/CD3G/CD3D/LCK/B2M/CCL4/IL1R1/IL12B/CD8A/STAT6/IL2/CD8B/EOMES/FASLG/TBX21/IL2RG/HLA-A/GZMA/CD3E/CD247/IL12A/GADD45G/IL2RB/IL18/STAT5A/CD4/IL1B/CCR5/HLA-DRA
WP_NUCLEOTIDE_EXCISION_REPAIR_IN_XERODERMA_PIGMENTOSUM	WP_NUCLEOTIDE_EXCISION_REPAIR_IN_XERODERMA_PIGMENTOSUM	75	0.495504	1.67154	0.00254969	0.0168775	0.0125318	10377	tags=53%, list=30%, signal=37%	BRCA1/POLE2/H4C5/POLD1/LIG1/H4C9/H4C1/H4C4/RFC4/RFC3/RFC2/RFC5/H4C8/POLD3/PCNA/POLE/POLE4/H4C3/H2AC6/RPA2/POLE3/RAD18/HMGN1/RPA3/POLD2/ERCC2/PARP1/H3-3B/ERCC1/POLH/RBX1/GTF2H2/GTF2H3/CHD1L/RAD23B/H4C15/DDB2/ERCC3/RAD23A/H3-3A
REACTOME_DUAL_INCISION_IN_GG_NER	REACTOME_DUAL_INCISION_IN_GG_NER	41	0.59099	1.76626	0.00256764	0.0169518	0.012587	9244	tags=59%, list=27%, signal=43%	POLE2/POLD1/RFC4/RFC3/RFC2/RFC5/RPS27A/POLD3/PCNA/POLE/POLE4/PARP2/RPA2/POLE3/RPA3/UBA52/POLD2/ERCC2/PARP1/ERCC1/RBX1/GTF2H2/GTF2H3/CHD1L
WP_HISTONE_MODIFICATIONS	WP_HISTONE_MODIFICATIONS	65	0.512872	1.70247	0.00258036	0.0169913	0.0126163	5642	tags=34%, list=16%, signal=28%	EZH2/H4C5/H3C11/H3C7/H3C12/H4C9/H3C8/DOT1L/H4C1/H4C4/KMT5C/SUV39H2/H3C14/SMYD2/H4C8/H3C1/SUV39H1/H4C3/H3C10/KMT5A/H3C4/EHMT1
REACTOME_IRAK4_DEFICIENCY_TLR2_4	REACTOME_IRAK4_DEFICIENCY_TLR2_4	18	-0.691388	-1.77946	0.00258937	0.0170062	0.0126274	5197	tags=56%, list=15%, signal=47%	TLR6/CD36/TLR1/TLR2/FGB/BTK/LY96/CD14/FGG/FGA
WP_CELL_MIGRATION_AND_INVASION_THROUGH_P75NTR	WP_CELL_MIGRATION_AND_INVASION_THROUGH_P75NTR	30	0.625189	1.76435	0.0026253	0.0171974	0.0127694	2885	tags=27%, list=8%, signal=24%	EFNA2/MMP9/EFNB3/NTRK2/MMP8/EFNA5/CDH11/EFNB1
REACTOME_E3_UBIQUITIN_LIGASES_UBIQUITINATE_TARGET_PROTEINS	REACTOME_E3_UBIQUITIN_LIGASES_UBIQUITINATE_TARGET_PROTEINS	59	0.519595	1.67976	0.00269461	0.0176057	0.0130726	8567	tags=41%, list=25%, signal=31%	H2BC14/H2BC7/H2BC17/H2BC8/H2BC4/H2BC11/H2BC10/H2BC12/H2BC9/H2BC6/RPS27A/H2BC13/PCNA/SELENOS/RAD18/H2BC15/H2BC5/UBA52/PRKDC/UBE2V2/BCL10/PEX13/CDC73/PEX10
REACTOME_TRANSCRIPTION_OF_E2F_TARGETS_UNDER_NEGATIVE_CONTROL_BY_P107_RBL1_AND_P130_RBL2_IN_COMPLEX_WITH_HDAC1	REACTOME_TRANSCRIPTION_OF_E2F_TARGETS_UNDER_NEGATIVE_CONTROL_BY_P107_RBL1_AND_P130_RBL2_IN_COMPLEX_WITH_HDAC1	16	0.729098	1.81582	0.00270683	0.0176398	0.0130979	3028	tags=38%, list=9%, signal=34%	MYBL2/CDK1/CCNA2/E2F1/LIN9/RBL1
REACTOME_O_GLYCOSYLATION_OF_TSR_DOMAIN_CONTAINING_PROTEINS	REACTOME_O_GLYCOSYLATION_OF_TSR_DOMAIN_CONTAINING_PROTEINS	39	0.582207	1.73126	0.00271949	0.0176767	0.0131253	5348	tags=46%, list=16%, signal=39%	ADAMTS19/ADAMTS2/THSD7B/ADAMTS4/ADAMTS12/ADAMTS20/ADAMTS14/ADAMTS6/ADAMTS1/SBSPON/CFP/SSPOP/ADAMTS5/ADAMTS9/ADAMTS13/THBS2/SEMA5B/ADAMTS3
REACTOME_SNRNP_ASSEMBLY	REACTOME_SNRNP_ASSEMBLY	54	0.537166	1.70122	0.00276233	0.0178738	0.0132716	10286	tags=59%, list=30%, signal=42%	NUP188/NDC1/NUP107/NUP62/GEMIN2/NUP85/WDR77/SNRPD1/NUP155/NCBP1/SNRPG/SNRPE/PRMT5/NUP35/SNRPD2/NUP160/NUP58/NUP93/NUP210/SNRPF/GEMIN7/RAE1/NUP205/NUP214/NUP98/CLNS1A/TPR/NUP50/SNRPB/NUP153/SNRPD3/NUP37
KEGG_TGF_BETA_SIGNALING_PATHWAY	KEGG_TGF_BETA_SIGNALING_PATHWAY	86	0.482588	1.64944	0.00276399	0.0178738	0.0132716	5106	tags=30%, list=15%, signal=26%	PITX2/BMP7/INHBE/COMP/LEFTY2/AMH/LEFTY1/INHBC/DCN/THBS4/NODAL/GDF5/LTBP1/TGFBR1/TGFB3/IFNG/RBL1/BMP5/MYC/NOG/PPP2R1A/THBS3/BMP8B/TGFB2/THBS2/TFDP1
REACTOME_INTERLEUKIN_3_INTERLEUKIN_5_AND_GM_CSF_SIGNALING	REACTOME_INTERLEUKIN_3_INTERLEUKIN_5_AND_GM_CSF_SIGNALING	48	-0.518524	-1.68438	0.00279128	0.0180041	0.0133684	7804	tags=44%, list=23%, signal=34%	HCK/PTPN6/IL5/VAV1/PIK3CD/PIK3CB/IL2/BLNK/CSF2RB/PIK3R1/IL2RG/STAT5B/JAK3/IL5RA/INPP5D/IL2RB/STAT5A/CSF2/CSF2RA/SYK/IL3
REACTOME_PROCESSIVE_SYNTHESIS_ON_THE_C_STRAND_OF_THE_TELOMERE	REACTOME_PROCESSIVE_SYNTHESIS_ON_THE_C_STRAND_OF_THE_TELOMERE	19	0.686206	1.77107	0.00288877	0.0184819	0.0137231	7801	tags=58%, list=23%, signal=45%	BLM/DNA2/FEN1/POLD1/LIG1/POLD3/PCNA/RPA2/RPA3/POLD2/ACD
REACTOME_TP53_REGULATES_TRANSCRIPTION_OF_DNA_REPAIR_GENES	REACTOME_TP53_REGULATES_TRANSCRIPTION_OF_DNA_REPAIR_GENES	62	0.513126	1.68556	0.00288015	0.0184819	0.0137231	9553	tags=39%, list=28%, signal=28%	CHEK1/BRCA1/FANCD2/FANCI/ELOA2/FANCC/MSH2/POLR2D/NELFB/SUPT16H/SSRP1/POLR2G/ELOA/MDC1/FOS/POLR2L/ERCC2/JUN/RAD51D/POLR2H/GTF2H2/GTF2H3/CCNT1/POLR2F
REACTOME_SARS_COV_2_MODULATES_HOST_TRANSLATION_MACHINERY	REACTOME_SARS_COV_2_MODULATES_HOST_TRANSLATION_MACHINERY	51	0.534763	1.67221	0.00289466	0.0184819	0.0137231	9249	tags=65%, list=27%, signal=47%	RPS27A/RPS19/RPS7/RPS5/RPS18/RPS3/RPS2/GEMIN2/RPS12/RPS8/SNRPD1/RPS10/SNRPG/SNRPE/RPS16/RPS26/RPS29/RPS24/RPS25/RPS6/RPS13/RPS9/RPS3A/RPS11/RPS15/RPS27/SNRPD2/RPS21/RPS15A/RPS17/SNRPF/GEMIN7/RPS28
WP_COMPLEMENT_SYSTEM_IN_NEURONAL_DEVELOPMENT_AND_PLASTICITY	WP_COMPLEMENT_SYSTEM_IN_NEURONAL_DEVELOPMENT_AND_PLASTICITY	105	-0.423729	-1.58625	0.00287917	0.0184819	0.0137231	5452	tags=32%, list=16%, signal=27%	CRB2/C1R/CFI/C8B/CFD/GAS6/PROS1/PARD6A/FASLG/CD55/ITGB2/PARD6B/PATJ/ATP8B1/CLU/COLEC11/C6/C9/C5AR1/MERTK/ITGAM/C7/COLEC12/C4B/CR1/C4A/CR2/C4BPA/MBP/CX3CR1/C3/ATP10A/COLEC10/MASP1
WP_ELECTRON_TRANSPORT_CHAIN_OXPHOS_SYSTEM_IN_MITOCHONDRIA	WP_ELECTRON_TRANSPORT_CHAIN_OXPHOS_SYSTEM_IN_MITOCHONDRIA	90	-0.43943	-1.61667	0.00300696	0.0191504	0.0142195	11823	tags=58%, list=34%, signal=38%	NDUFS3/COX5A/NDUFA8/COX11/SCO1/NDUFS4/NDUFV1/COX15/NDUFB7/NDUFB2/ATP5PD/ATP5MF/SDHD/ATP5F1D/NDUFA9/SDHC/UCP2/ATP5F1A/UQCRQ/NDUFC2/COX5B/ATP5MC1/ATP5PO/COX6A1/DMAC2L/SLC25A14/COX4I1/NDUFS7/NDUFA2/NDUFB4/COX6B1/NDUFS2/UQCRC1/UQCRB/ATP5ME/NDUFA4/NDUFB8/COX17/UCP1/NDUFB10/COX6C/NDUFA5/COX7C/SDHA/NDUFC1/UQCRC2/NDUFA3/COX7B/NDUFA1/SLC25A4/COX6A2/COX7A1
WP_ESTROGEN_METABOLISM	WP_ESTROGEN_METABOLISM	18	-0.687738	-1.77006	0.00303096	0.0192513	0.0142944	2246	tags=39%, list=7%, signal=36%	SULT1E1/ARSD/UGT1A6/GSTM1/UGT1A9/UGT1A1/CYP3A4
REACTOME_NUCLEOTIDE_EXCISION_REPAIR	REACTOME_NUCLEOTIDE_EXCISION_REPAIR	110	0.454588	1.61874	0.00303807	0.0192513	0.0142944	9673	tags=41%, list=28%, signal=30%	POLE2/POLD1/LIG1/RFC4/RFC3/RFC2/RFC5/RPS27A/POLD3/PCNA/POLE/POLE4/PARP2/RPA2/POLE3/COPS7B/POLR2D/INO80B/HMGN1/RPA3/UBA52/POLR2G/RUVBL1/TFPT/ACTL6A/NFRKB/SUMO1/POLR2L/POLD2/ERCC2/UBE2V2/COPS8/SUMO2/PARP1/POLR2H/ERCC1/RBX1/GTF2H2/GTF2H3/CHD1L/COPS3/SUMO3/POLR2F/ISY1/RAD23B
REACTOME_TRANSLESION_SYNTHESIS_BY_POLK	REACTOME_TRANSLESION_SYNTHESIS_BY_POLK	17	0.722487	1.81736	0.00312807	0.0197719	0.014681	6119	tags=59%, list=18%, signal=48%	RFC4/RFC3/RFC2/MAD2L2/RFC5/RPS27A/PCNA/RPA2/RPA3/UBA52
REACTOME_ION_CHANNEL_TRANSPORT	REACTOME_ION_CHANNEL_TRANSPORT	183	-0.356559	-1.45202	0.00315804	0.0199115	0.0147846	5719	tags=36%, list=17%, signal=30%	RIPK3/TPCN1/ASPH/ATP7A/TSC22D3/CLCN7/ASIC2/CLCNKA/SLC9C2/TRPV5/SLC9B1/ANO10/ATP1A1/ANO4/CLCNKB/ANO3/ATP13A5/ATP6V0E2/TRPM2/SLC9B2/FXYD2/ATP6V1B2/CLCN3/ANO5/CAMK2D/CLCN5/FXYD6/MCOLN1/ATP8B1/ATP1B1/CASQ2/ATP1B2/ATP2A3/SGK2/TRPV6/ATP9A/TCIRG1/ATP2B3/ANO9/ATP12A/CLCA2/CLCN4/SLC9C1/FXYD1/WNK2/ATP10B/SLC17A3/ATP8B4/NALCN/CASQ1/CLIC2/ATP8A2/MCOLN3/FXYD4/CAMK2A/FXYD7/PLN/TRPC3/ASIC5/ATP1A4/MCOLN2/TRDN/SC…
REACTOME_MET_PROMOTES_CELL_MOTILITY	REACTOME_MET_PROMOTES_CELL_MOTILITY	41	0.584909	1.74809	0.00320535	0.0201593	0.0149687	3673	tags=34%, list=11%, signal=31%	COL2A1/LAMA1/COL11A1/COL5A3/COL5A1/COL3A1/COL5A2/LAMA4/FN1/COL1A2/COL1A1/COL24A1/COL11A2/LAMA2
BIOCARTA_IL5_PATHWAY	BIOCARTA_IL5_PATHWAY	11	-0.757523	-1.73985	0.00324135	0.020335	0.0150991	2693	tags=73%, list=8%, signal=67%	IL5RA/CD4/HLA-DRB1/IL1B/CCR3/HLA-DRA/CCL11/HLA-DRB5
REACTOME_INTERLEUKIN_15_SIGNALING	REACTOME_INTERLEUKIN_15_SIGNALING	14	-0.718262	-1.74709	0.00339651	0.021203	0.0157436	3552	tags=43%, list=10%, signal=38%	IL15/IL2RG/STAT5B/JAK3/IL2RB/STAT5A
KEGG_PYRIMIDINE_METABOLISM	KEGG_PYRIMIDINE_METABOLISM	97	0.451053	1.58113	0.00339098	0.021203	0.0157436	7522	tags=33%, list=22%, signal=26%	RRM2/TK1/TYMS/ENTPD8/POLE2/DTYMK/POLD1/POLR1E/PRIM1/NT5E/RRM1/CAD/POLA2/UCK2/POLD3/PRIM2/POLR3D/POLE/NT5M/POLE4/POLE3/POLR2D/PNP/NT5C/CMPK1/POLR2G/POLA1/NME4/POLR2L/DUT/POLD2/PNPT1
KEGG_CELL_ADHESION_MOLECULES_CAMS	KEGG_CELL_ADHESION_MOLECULES_CAMS	129	-0.382028	-1.49071	0.00343859	0.0214127	0.0158993	4055	tags=39%, list=12%, signal=34%	CNTN2/SDC3/HLA-G/SELE/HLA-C/HLA-F/CDH2/NEO1/JAM3/CD8A/SDC2/ITGA8/NEGR1/CD8B/CD86/HLA-E/ITGB2/HLA-B/CTLA4/ITGB7/PTPRM/HLA-A/CD40/CD2/ITGAL/CLDN3/VCAN/CD4/MADCAM1/PDCD1/ITGAM/HLA-DMA/SDC4/NRCAM/SELPLG/CD40LG/HLA-DRB1/PTPRC/SPN/CLDN2/HLA-DQB1/HLA-DPB1/HLA-DQA1/SELP/HLA-DRA/HLA-DPA1/HLA-DQA2/HLA-DOA/HLA-DRB5/CLDN8
PID_ATM_PATHWAY	PID_ATM_PATHWAY	34	0.595747	1.72703	0.00353821	0.0219787	0.0163196	7739	tags=41%, list=22%, signal=32%	CDC25C/CDC25A/BLM/BRCA1/FANCD2/H2AX/CHEK2/DCLRE1C/RAD9A/TRIM28/RBBP8/MDC1/MRE11/SMC1A
REACTOME_NUCLEAR_IMPORT_OF_REV_PROTEIN	REACTOME_NUCLEAR_IMPORT_OF_REV_PROTEIN	34	0.595539	1.72643	0.00360434	0.0223345	0.0165838	10286	tags=65%, list=30%, signal=45%	RCC1/RAN/NUP188/NDC1/NUP107/NUP62/NUP85/NUP155/KPNB1/NUP35/NUP160/NUP58/NUP93/NUP210/RAE1/NUP205/NUP214/NUP98/TPR/NUP50/NUP153/NUP37
WP_MIR5093P_ALTERATION_OF_YAP1ECM_AXIS	WP_MIR5093P_ALTERATION_OF_YAP1ECM_AXIS	18	0.683848	1.75216	0.00364898	0.0225557	0.016748	6159	tags=50%, list=18%, signal=41%	COL5A1/COL3A1/FN1/TEAD4/SPARC/COL1A1/GPC6/THBS2/EDNRA
WP_VITAMIN_A_AND_CAROTENOID_METABOLISM	WP_VITAMIN_A_AND_CAROTENOID_METABOLISM	43	-0.522473	-1.67227	0.00373016	0.0230011	0.0170788	2090	tags=26%, list=6%, signal=24%	RBP2/BCO2/DHRS3/NPC1L1/RARB/RDH8/ALDH1A1/RDH12/ADH1A/ADH4/RBP4
REACTOME_EXPORT_OF_VIRAL_RIBONUCLEOPROTEINS_FROM_NUCLEUS	REACTOME_EXPORT_OF_VIRAL_RIBONUCLEOPROTEINS_FROM_NUCLEUS	33	0.589868	1.7102	0.00382786	0.0234887	0.0174408	10286	tags=64%, list=30%, signal=45%	RAN/NUP188/NDC1/NUP107/NUP62/NUP85/NUP155/XPO1/NUP35/NUP160/NUP58/NUP93/NUP210/RAE1/NUP205/NUP214/NUP98/TPR/NUP50/NUP153/NUP37
REACTOME_TRANSCRIPTION_COUPLED_NUCLEOTIDE_EXCISION_REPAIR_TC_NER	REACTOME_TRANSCRIPTION_COUPLED_NUCLEOTIDE_EXCISION_REPAIR_TC_NER	78	0.48323	1.6312	0.0038216	0.0234887	0.0174408	9590	tags=41%, list=28%, signal=30%	POLE2/POLD1/LIG1/RFC4/RFC3/RFC2/RFC5/RPS27A/POLD3/PCNA/POLE/POLE4/RPA2/POLE3/COPS7B/POLR2D/HMGN1/RPA3/UBA52/POLR2G/POLR2L/POLD2/ERCC2/COPS8/POLR2H/ERCC1/RBX1/GTF2H2/GTF2H3/COPS3/POLR2F/ISY1
WP_BLOOD_CLOTTING_CASCADE	WP_BLOOD_CLOTTING_CASCADE	22	-0.648217	-1.74037	0.00384222	0.0235196	0.0174637	4857	tags=59%, list=14%, signal=51%	F9/F8/KLKB1/F7/F10/PLAT/F3/F11/FGB/KLK1/FGG/F2/FGA
KEGG_CYTOKINE_CYTOKINE_RECEPTOR_INTERACTION	KEGG_CYTOKINE_CYTOKINE_RECEPTOR_INTERACTION	260	-0.322912	-1.37351	0.00391336	0.0238971	0.017744	4288	tags=30%, list=12%, signal=26%	IL6ST/CCL5/IL1A/ACVR2B/TNFSF13/CCL4L2/FASLG/PDGFC/IL6R/EDA2R/CCR1/CXCL6/TNFRSF11B/IL17B/IL15/CSF2RB/CTF1/BMPR1B/PRLR/TNFSF11/IL2RG/CCL3L3/TNFRSF18/IFNGR1/TNFRSF11A/IL12A/IL5RA/TGFBR2/CCR4/CD40/CXCR3/IL2RB/TNFRSF14/IL18/CXCL12/FLT3/LTB/IL10RA/XCL1/HGF/MET/CSF2/CCL16/TNFSF12/TNFRSF10D/TNFSF14/TNF/CCL21/CCR8/CCL14/CSF3R/CXCR6/CSF2RA/CSF1R/CD40LG/CSF1/IL1B/XCL2/EGF/TNFSF18/IL3/IFNL1/VEGFD/CCR5/CCR2/C…
KEGG_SPLICEOSOME	KEGG_SPLICEOSOME	127	0.430359	1.55355	0.00400303	0.0243856	0.0181068	12811	tags=67%, list=37%, signal=42%	PPIL1/HSPA6/ALYREF/SNRPA1/LSM4/PHF5A/SNRPD1/EIF4A3/PRPF4/LSM2/NCBP1/PRPF38A/THOC3/SNRPG/HNRNPA1/SNRPE/LSM7/HSPA1B/PPIH/SNRNP40/PRPF40A/SF3B4/SNRPA/SF3B6/SNRNP27/SNRPC/SNRNP70/HNRNPA3/SNRPD2/SMNDC1/SRSF7/U2AF1/SF3A2/SRSF3/HNRNPM/DDX23/LSM5/SRSF2/SNRPF/SF3A3/SRSF9/HSPA8/PUF60/HNRNPC/MAGOH/LSM3/SNW1/ISY1/EFTUD2/DHX16/SNRPB/SNRPD3/CDC5L/SF3B3/RBM8A/SF3B2/RBMX/DHX15/SF3B1/TXNL4A/DDX39B/TCERG1/USP39/HN…
REACTOME_TRANSPORT_OF_CONNEXONS_TO_THE_PLASMA_MEMBRANE	REACTOME_TRANSPORT_OF_CONNEXONS_TO_THE_PLASMA_MEMBRANE	21	0.670938	1.78256	0.0042915	0.0260799	0.0193648	6471	tags=57%, list=19%, signal=46%	TUBA3C/TUBB2B/TUBB6/TUBB2A/TUBB3/TUBB4B/GJB2/TUBA1B/TUBB1/TUBA1C/TUBA8/TUBA3D
REACTOME_RA_BIOSYNTHESIS_PATHWAY	REACTOME_RA_BIOSYNTHESIS_PATHWAY	22	-0.643623	-1.72804	0.00448792	0.027144	0.0201549	1851	tags=27%, list=5%, signal=26%	DHRS3/AKR1C3/ALDH1A1/ADH1A/ADH4/ADH1C
REACTOME_TRANSPORT_OF_THE_SLBP_DEPENDANT_MATURE_MRNA	REACTOME_TRANSPORT_OF_THE_SLBP_DEPENDANT_MATURE_MRNA	36	0.582928	1.71245	0.00448812	0.027144	0.0201549	10286	tags=61%, list=30%, signal=43%	NUP188/ALYREF/NDC1/NUP107/NUP62/NUP85/NUP155/NCBP1/NUP35/NUP160/NUP58/NUP93/NUP210/RAE1/NUP205/NUP214/NUP98/TPR/NUP50/SLBP/NUP153/NUP37
REACTOME_HORMONE_LIGAND_BINDING_RECEPTORS	REACTOME_HORMONE_LIGAND_BINDING_RECEPTORS	12	0.781466	1.78438	0.00461207	0.0278148	0.020653	5428	tags=58%, list=16%, signal=49%	LHB/CGA/GNRHR/FSHR/GPHA2/GPHB5/GNRH2
REACTOME_METALLOPROTEASE_DUBS	REACTOME_METALLOPROTEASE_DUBS	35	0.582946	1.70578	0.0046211	0.0278148	0.020653	6590	tags=46%, list=19%, signal=37%	H2AC14/H2AC12/H2AC4/BRCA1/H2AC17/H2AC16/BARD1/H2AC21/H2AC8/RPS27A/H2AC13/H2AC6/PSMD14/UBA52/H2AC19/H2AC18
REACTOME_TP53_REGULATES_TRANSCRIPTION_OF_SEVERAL_ADDITIONAL_CELL_DEATH_GENES_WHOSE_SPECIFIC_ROLES_IN_P53_DEPENDENT_APOPTOSIS_REMAIN_UNCERTAIN	REACTOME_TP53_REGULATES_TRANSCRIPTION_OF_SEVERAL_ADDITIONAL_CELL_DEATH_GENES_WHOSE_SPECIFIC_ROLES_IN_P53_DEPENDENT_APOPTOSIS_REMAIN_UNCERTAIN	14	0.734671	1.75896	0.00468843	0.0281529	0.0209041	5607	tags=43%, list=16%, signal=36%	TP73/BIRC5/NDRG1/PERP/TP53I3/BCL2L14
SA_G1_AND_S_PHASES	SA_G1_AND_S_PHASES	15	0.731966	1.77888	0.00476658	0.0285542	0.021202	2189	tags=27%, list=6%, signal=25%	E2F2/CDKN2A/E2F1/CDK2
BIOCARTA_INTRINSIC_PATHWAY	BIOCARTA_INTRINSIC_PATHWAY	23	-0.625831	-1.71283	0.0048969	0.0292654	0.0217301	4857	tags=52%, list=14%, signal=45%	F9/F8/PROS1/KLKB1/F10/F11/FGB/COL4A4/COL4A3/FGG/F2/FGA
REACTOME_SYNDECAN_INTERACTIONS	REACTOME_SYNDECAN_INTERACTIONS	27	0.629447	1.73608	0.00491352	0.0292953	0.0217523	3246	tags=37%, list=9%, signal=34%	TNC/COL5A3/COL5A1/COL3A1/COL5A2/ITGB3/FN1/COL1A2/SDC1/COL1A1
BIOCARTA_GHRELIN_PATHWAY	BIOCARTA_GHRELIN_PATHWAY	13	-0.723965	-1.74484	0.00497787	0.0296089	0.0219852	4562	tags=46%, list=13%, signal=40%	IGF1/GHRL/IGFBP6/GHRH/IGFALS/SST
WP_PROGERIAASSOCIATED_LIPODYSTROPHY	WP_PROGERIAASSOCIATED_LIPODYSTROPHY	22	0.675059	1.79961	0.00500384	0.0296934	0.0220479	3116	tags=23%, list=9%, signal=21%	KCNJ6/LMNB1/POLD1/LMNB2/INS
REACTOME_TELOMERE_EXTENSION_BY_TELOMERASE	REACTOME_TELOMERE_EXTENSION_BY_TELOMERASE	23	0.660712	1.77292	0.0051326	0.0303859	0.0225621	4256	tags=26%, list=12%, signal=23%	TERT/PIF1/CCNA2/CDK2/CCNA1/RUVBL2
WP_TUMOR_SUPPRESSOR_ACTIVITY_OF_SMARCB1	WP_TUMOR_SUPPRESSOR_ACTIVITY_OF_SMARCB1	31	0.588159	1.67517	0.00516228	0.0304901	0.0226395	10377	tags=65%, list=30%, signal=45%	DPF1/EZH2/GLI2/GLI1/CDKN2A/GLI3/EED/CDK4/ACTL6A/DPF3/RBBP4/H3-3B/SMARCA4/SMARCC1/PTCH1/SUZ12/GLI4/SMO/SMARCD1/H3-3A
REACTOME_CHEMOKINE_RECEPTORS_BIND_CHEMOKINES	REACTOME_CHEMOKINE_RECEPTORS_BIND_CHEMOKINES	56	-0.478509	-1.62314	0.00518832	0.0305723	0.0227005	2975	tags=48%, list=9%, signal=44%	ACKR4/CCL5/CCR1/CXCL6/CCL3L3/CCR4/CXCR3/CXCL12/ACKR2/XCL1/CCL16/CCL21/CCR8/CXCR6/XCL2/CCR5/CCR2/CCR9/CCR3/CCL13/CCL17/CCL11/CCL2/CCL7/XCR1/CX3CR1/CCL19
REACTOME_COOPERATION_OF_PREFOLDIN_AND_TRIC_CCT_IN_ACTIN_AND_TUBULIN_FOLDING	REACTOME_COOPERATION_OF_PREFOLDIN_AND_TRIC_CCT_IN_ACTIN_AND_TUBULIN_FOLDING	33	0.5774	1.67405	0.00520194	0.0305811	0.022707	7983	tags=52%, list=23%, signal=40%	TUBA3C/TUBB2B/TUBB6/TUBB2A/TUBB3/TUBB4B/CCT2/TUBA1B/CCT4/TUBB1/TUBA1C/TUBA8/TUBA3D/CCT3/CCT7/VBP1/CCT5
REACTOME_CARBOXYTERMINAL_POST_TRANSLATIONAL_MODIFICATIONS_OF_TUBULIN	REACTOME_CARBOXYTERMINAL_POST_TRANSLATIONAL_MODIFICATIONS_OF_TUBULIN	44	0.558636	1.69751	0.00528593	0.0309307	0.0229666	6884	tags=52%, list=20%, signal=42%	TUBA3C/TUBB2B/TUBB6/TTLL2/VASH2/TTLL8/TUBB2A/TUBB3/TUBB4B/TUBA1B/TTLL7/TUBB1/VASH1/AGBL4/TTL/TUBA1C/TUBA8/AGBL2/TTLL5/TUBA3D/TPGS1/TPGS2/TTLL12
KEGG_FOCAL_ADHESION	KEGG_FOCAL_ADHESION	199	0.38249	1.46128	0.00527913	0.0309307	0.0229666	3673	tags=16%, list=11%, signal=14%	COL2A1/LAMA1/TNC/IBSP/COL11A1/MYLK2/RAC3/COL5A3/COMP/COL5A1/COL3A1/COL5A2/COL6A3/LAMA4/COL4A2/ITGB3/VEGFC/FN1/ITGA2B/ITGA7/COL4A1/COL1A2/THBS4/PRKCG/RELN/ACTN2/SHC4/COL6A2/COL1A1/PGF/COL11A2/LAMA2
REACTOME_METABOLISM_OF_STEROIDS	REACTOME_METABOLISM_OF_STEROIDS	154	0.406633	1.5125	0.0053734	0.0313697	0.0232926	4176	tags=27%, list=12%, signal=24%	SLCO1B1/SLC51A/LHB/SLCO1A2/CYP24A1/CGA/ABCB11/ACAT2/HSD17B3/FDPS/HMGCS1/MVD/BAAT/SQLE/FDX2/IDI1/STARD4/INSIG1/HSD11B2/FDFT1/MVK/VDR/DHCR7/FASN/LRP2/CYP27B1/HSD17B7/HMGCR/SERPINA6/RAN/SC5D/HSD17B2/LBR/NSDHL/SCAP/SCD/STARD3/CYP51A1/LSS/HSD17B12/FDX1/OSBPL6
WP_GDNFRET_SIGNALING_AXIS	WP_GDNFRET_SIGNALING_AXIS	23	0.658741	1.76763	0.00540096	0.0314578	0.023358	4640	tags=52%, list=13%, signal=45%	AGTR2/LHX1/GDNF/SOX11/ROBO2/EYA1/GATA3/FOXC2/GREM1/PAX2/HSPB11/GLI3
REACTOME_SIGNALING_BY_RETINOIC_ACID	REACTOME_SIGNALING_BY_RETINOIC_ACID	43	-0.507635	-1.62478	0.00544878	0.0316632	0.0235105	1851	tags=19%, list=5%, signal=18%	DHRS3/PDK2/AKR1C3/RARB/ALDH1A1/ADH1A/ADH4/ADH1C
REACTOME_O_LINKED_GLYCOSYLATION	REACTOME_O_LINKED_GLYCOSYLATION	111	0.441579	1.57648	0.00546654	0.0316934	0.0235329	5348	tags=35%, list=16%, signal=30%	ADAMTS19/GALNT9/ADAMTS2/GALNT5/THSD7B/ADAMTS4/MUC1/ADAMTS12/ADAMTS20/ADAMTS14/MUC13/GALNT12/ADAMTS6/MUC5B/ADAMTS1/GCNT1/SBSPON/GALNTL5/B3GNT4/LARGE2/CFP/SSPOP/GALNT2/ST3GAL4/ADAMTS5/ADAMTS9/GALNT18/MUC12/ST3GAL3/POMK/MUC21/POMT2/ADAMTS13/MUC3A/GALNT10/THBS2/SEMA5B/ST6GALNAC3/ADAMTS3
REACTOME_REGULATION_OF_TP53_ACTIVITY_THROUGH_ASSOCIATION_WITH_CO_FACTORS	REACTOME_REGULATION_OF_TP53_ACTIVITY_THROUGH_ASSOCIATION_WITH_CO_FACTORS	14	0.728632	1.7445	0.00549794	0.0318023	0.0236138	62	tags=14%, list=0%, signal=14%	TP73/POU4F1
KEGG_GLYCOLYSIS_GLUCONEOGENESIS	KEGG_GLYCOLYSIS_GLUCONEOGENESIS	60	-0.476766	-1.62807	0.00561275	0.0323921	0.0240518	2871	tags=20%, list=8%, signal=18%	ALDH3B1/ALDOB/ALDH2/ALDH3A1/ADH7/HK2/ALDH3B2/ADH6/ADH1A/ADH4/ADH1B/ADH1C
REACTOME_RECYCLING_OF_BILE_ACIDS_AND_SALTS	REACTOME_RECYCLING_OF_BILE_ACIDS_AND_SALTS	18	0.669836	1.71626	0.0058315	0.0335777	0.0249321	1389	tags=28%, list=4%, signal=27%	SLCO1B1/SLC51A/SLCO1A2/ABCB11/BAAT
PID_GMCSF_PATHWAY	PID_GMCSF_PATHWAY	36	-0.536839	-1.65231	0.00586738	0.0337074	0.0250284	4337	tags=31%, list=13%, signal=27%	IRF8/CSF2RB/PIK3R1/STAT5B/STAT5A/CSF2/PRKACG/CSF2RA/SYK/CISH/CCL2
PID_ANGIOPOIETIN_RECEPTOR_PATHWAY	PID_ANGIOPOIETIN_RECEPTOR_PATHWAY	49	-0.502083	-1.63475	0.00593076	0.033994	0.0252412	3849	tags=27%, list=11%, signal=24%	ELF1/MMP2/AGTR1/ANGPT1/GRB7/NOS3/PIK3R1/STAT5B/TEK/STAT5A/TNF/GRB14/F2
REACTOME_MISMATCH_REPAIR	REACTOME_MISMATCH_REPAIR	15	0.72114	1.75257	0.0062754	0.0357188	0.0265219	6018	tags=60%, list=17%, signal=50%	EXO1/POLD1/LIG1/MSH2/POLD3/PCNA/MSH6/RPA2/RPA3
REACTOME_SODIUM_CALCIUM_EXCHANGERS	REACTOME_SODIUM_CALCIUM_EXCHANGERS	11	-0.733118	-1.68379	0.00627782	0.0357188	0.0265219	8164	tags=73%, list=24%, signal=56%	SLC8A2/SLC24A5/SRI/SLC24A1/SLC8A1/SLC24A3/SLC24A4/SLC24A2
REACTOME_ESTABLISHMENT_OF_SISTER_CHROMATID_COHESION	REACTOME_ESTABLISHMENT_OF_SISTER_CHROMATID_COHESION	11	0.735395	1.66283	0.00628833	0.0357188	0.0265219	208	tags=18%, list=1%, signal=18%	ESCO2/CDCA5
REACTOME_DUAL_INCISION_IN_TC_NER	REACTOME_DUAL_INCISION_IN_TC_NER	65	0.488388	1.62119	0.00626797	0.0357188	0.0265219	9590	tags=43%, list=28%, signal=31%	POLE2/POLD1/RFC4/RFC3/RFC2/RFC5/RPS27A/POLD3/PCNA/POLE/POLE4/RPA2/POLE3/POLR2D/HMGN1/RPA3/UBA52/POLR2G/POLR2L/POLD2/ERCC2/POLR2H/ERCC1/RBX1/GTF2H2/GTF2H3/POLR2F/ISY1
REACTOME_ERBB2_ACTIVATES_PTK6_SIGNALING	REACTOME_ERBB2_ACTIVATES_PTK6_SIGNALING	13	-0.715803	-1.72517	0.00633182	0.0358851	0.0266453	4468	tags=54%, list=13%, signal=47%	NRG3/NRG2/NRG1/BTC/EGF/ERBB4/ERBB3
REACTOME_DISEASES_ASSOCIATED_WITH_O_GLYCOSYLATION_OF_PROTEINS	REACTOME_DISEASES_ASSOCIATED_WITH_O_GLYCOSYLATION_OF_PROTEINS	68	0.500048	1.6633	0.00636642	0.0360002	0.0267308	5348	tags=38%, list=16%, signal=32%	ADAMTS19/ADAMTS2/THSD7B/ADAMTS4/MUC1/ADAMTS12/ADAMTS20/ADAMTS14/MUC13/GALNT12/ADAMTS6/MUC5B/ADAMTS1/SBSPON/CFP/SSPOP/ADAMTS5/ADAMTS9/MUC12/MUC21/POMT2/ADAMTS13/MUC3A/THBS2/SEMA5B/ADAMTS3
REACTOME_INTERLEUKIN_2_SIGNALING	REACTOME_INTERLEUKIN_2_SIGNALING	12	-0.736876	-1.73426	0.0064495	0.0363885	0.0270191	6394	tags=67%, list=19%, signal=54%	LCK/IL2/IL2RG/STAT5B/JAK3/IL2RB/STAT5A/SYK
REACTOME_PI3K_EVENTS_IN_ERBB4_SIGNALING	REACTOME_PI3K_EVENTS_IN_ERBB4_SIGNALING	10	-0.752476	-1.67967	0.00661066	0.0372145	0.0276324	4468	tags=60%, list=13%, signal=52%	NRG3/PIK3R1/NRG2/NRG1/BTC/ERBB4
REACTOME_SYNTHESIS_OF_LEUKOTRIENES_LT_AND_EOXINS_EX	REACTOME_SYNTHESIS_OF_LEUKOTRIENES_LT_AND_EOXINS_EX	21	-0.639573	-1.69722	0.00681153	0.0382599	0.0284087	4154	tags=48%, list=12%, signal=42%	CYP4F8/ALOX15/CYP4F2/ALOX5/CYP4A11/CYP4F22/DPEP3/CYP4A22/CYP4B1/CYP4F11
WP_COMPLEMENT_SYSTEM	WP_COMPLEMENT_SYSTEM	96	-0.407081	-1.50882	0.00687101	0.0385082	0.0285931	3881	tags=32%, list=11%, signal=29%	ADIPOQ/CD55/ITGB2/VSIG4/KLKB1/LAMA5/CD19/GNA15/PRKCA/WAS/F10/TLR2/CD40/C6/C9/F11/C5AR1/FGB/PRNP/C7/SELPLG/ALB/CR1/C4A/SELP/CR2/C4BPA/C3/MASP1/FGG/FGA
WP_22Q112_COPY_NUMBER_VARIATION_SYNDROME	WP_22Q112_COPY_NUMBER_VARIATION_SYNDROME	124	0.424575	1.52895	0.00688798	0.0385177	0.0286001	4978	tags=23%, list=14%, signal=19%	FOXA2/CDC45/PITX2/PLK1/GBX2/TBX1/USP41/CYP26B1/RTN4R/GP9/HAND2/FOXC2/H4C1/RELN/RCC1/RAN/RANBP1/SEPTIN5/FGF10/ZNF74/FGF8/LINC00896/SEPTIN11/GP5/HES1/RTL10/FGFR1/TMEM191A
REACTOME_REGULATION_OF_INSULIN_LIKE_GROWTH_FACTOR_IGF_TRANSPORT_AND_UPTAKE_BY_INSULIN_LIKE_GROWTH_FACTOR_BINDING_PROTEINS_IGFBPS	REACTOME_REGULATION_OF_INSULIN_LIKE_GROWTH_FACTOR_IGF_TRANSPORT_AND_UPTAKE_BY_INSULIN_LIKE_GROWTH_FACTOR_BINDING_PROTEINS_IGFBPS	124	-0.38341	-1.48821	0.00696346	0.0388536	0.0288495	3073	tags=20%, list=9%, signal=18%	MGAT4A/CHGB/PCSK9/WFS1/HRC/TIMP1/VCAN/BPIFB2/SERPINA1/ALB/CST3/CSF1/KLK2/SCG2/AMTN/IGFALS/C4A/CTSG/C3/AFP/KLK1/FGG/ENAM/F2/FGA
REACTOME_HYALURONAN_METABOLISM	REACTOME_HYALURONAN_METABOLISM	17	0.69221	1.7412	0.00725034	0.0401876	0.02984	5276	tags=53%, list=15%, signal=45%	HAS1/HMMR/LYVE1/HAS2/HYAL3/CEMIP/HAS3/GUSB/STAB2
PID_IL5_PATHWAY	PID_IL5_PATHWAY	14	-0.696062	-1.69309	0.00723534	0.0401876	0.02984	3533	tags=43%, list=10%, signal=38%	CSF2RB/PIK3R1/STAT5B/IL5RA/STAT5A/CISH
REACTOME_SUMOYLATION_OF_RNA_BINDING_PROTEINS	REACTOME_SUMOYLATION_OF_RNA_BINDING_PROTEINS	47	0.535434	1.65027	0.00723137	0.0401876	0.02984	11198	tags=66%, list=33%, signal=45%	CBX2/NUP188/NDC1/NUP107/NUP62/PHC2/NUP85/NUP155/NOP58/CBX8/SUMO1/RNF2/NUP35/SUMO2/NUP160/NUP58/NUP93/NUP210/HNRNPC/RAE1/NUP205/NUP214/NUP98/TPR/NUP50/NUP153/NUP37/SCMH1/PHC1/NUP54/HNRNPK
WP_MIRNAS_INVOLVED_IN_DNA_DAMAGE_RESPONSE	WP_MIRNAS_INVOLVED_IN_DNA_DAMAGE_RESPONSE	36	0.572474	1.68174	0.0072833	0.0402818	0.02991	3074	tags=25%, list=9%, signal=23%	CDC25A/MIR210/E2F1/CCNE1/H2AX/MIR221/MIR503/MYC/MIR93
REACTOME_EPHA_MEDIATED_GROWTH_CONE_COLLAPSE	REACTOME_EPHA_MEDIATED_GROWTH_CONE_COLLAPSE	29	0.588865	1.65426	0.00745686	0.0411514	0.0305557	2998	tags=28%, list=9%, signal=25%	EFNA2/EPHA5/NGEF/EFNA5/EPHA7/EPHA3/EPHA6/EPHA4
WP_ENDOCHONDRAL_OSSIFICATION	WP_ENDOCHONDRAL_OSSIFICATION	63	0.488494	1.60728	0.0074958	0.0411861	0.0305814	4948	tags=32%, list=14%, signal=27%	COL2A1/ACAN/MMP13/BMP7/CTSV/MMP9/ALPL/HMGCS1/ADAMTS4/NKX3-2/SERPINH1/ADAMTS1/RUNX2/ADAMTS5/PTHLH/PLAU/GLI3/STAT1/TGFB2/FGFR1
WP_ENDOCHONDRAL_OSSIFICATION_WITH_SKELETAL_DYSPLASIAS	WP_ENDOCHONDRAL_OSSIFICATION_WITH_SKELETAL_DYSPLASIAS	63	0.488494	1.60728	0.0074958	0.0411861	0.0305814	4948	tags=32%, list=14%, signal=27%	COL2A1/ACAN/MMP13/BMP7/CTSV/MMP9/ALPL/HMGCS1/ADAMTS4/NKX3-2/SERPINH1/ADAMTS1/RUNX2/ADAMTS5/PTHLH/PLAU/GLI3/STAT1/TGFB2/FGFR1
REACTOME_MISCELLANEOUS_SUBSTRATES	REACTOME_MISCELLANEOUS_SUBSTRATES	12	-0.726276	-1.70932	0.00763651	0.0417908	0.0310304	3621	tags=67%, list=11%, signal=60%	CYP4F2/CYP2S1/CYP4A11/CYP2U1/CYP4F22/CYP4A22/CYP4B1/CYP4F11
REACTOME_AFLATOXIN_ACTIVATION_AND_DETOXIFICATION	REACTOME_AFLATOXIN_ACTIVATION_AND_DETOXIFICATION	19	-0.631864	-1.64711	0.00763899	0.0417908	0.0310304	1327	tags=26%, list=4%, signal=25%	CYP3A5/DPEP3/ACY3/GGT6/CYP3A4
WP_PHOSPHOINOSITIDES_METABOLISM	WP_PHOSPHOINOSITIDES_METABOLISM	49	-0.493887	-1.60806	0.00772276	0.0421576	0.0313028	8055	tags=45%, list=23%, signal=34%	PLCB3/OCRL/PIK3R4/SACM1L/PLCB1/MTMR10/PLCH2/PIK3CD/PIP5K1B/PIK3C2G/PIP4K2A/PIK3CB/PIK3C2B/MTM1/PIP4P2/PIK3CG/PLCZ1/PLCD1/PLCE1/INPP5D/PLCB2/PLCH1
BIOCARTA_CSK_PATHWAY	BIOCARTA_CSK_PATHWAY	20	-0.657675	-1.73574	0.00778216	0.0423901	0.0314754	6654	tags=65%, list=19%, signal=52%	CD3G/CD3D/LCK/PRKAR1A/ZAP70/CD3E/CD247/CD4/PRKACG/HLA-DRB1/PTPRC/HLA-DRA/HLA-DRB5
REACTOME_SUMOYLATION_OF_SUMOYLATION_PROTEINS	REACTOME_SUMOYLATION_OF_SUMOYLATION_PROTEINS	35	0.562244	1.6452	0.00795148	0.043219	0.0320909	10286	tags=63%, list=30%, signal=44%	NUP188/NDC1/NUP107/NUP62/NUP85/NUP155/SUMO1/NUP35/SUMO2/NUP160/NUP58/NUP93/PIAS4/NUP210/RAE1/NUP205/NUP214/NUP98/TPR/NUP50/NUP153/NUP37
REACTOME_SYNTHESIS_OF_IP3_AND_IP4_IN_THE_CYTOSOL	REACTOME_SYNTHESIS_OF_IP3_AND_IP4_IN_THE_CYTOSOL	26	-0.585647	-1.66286	0.00817928	0.0443616	0.0329393	8193	tags=46%, list=24%, signal=35%	ITPKA/PLCB3/OCRL/PLCB1/PLCH2/PLCZ1/PLCD1/PLCE1/INPP5D/PLCB2/PLCH1/PLD4
REACTOME_CONVERSION_FROM_APC_C_CDC20_TO_APC_C_CDH1_IN_LATE_ANAPHASE	REACTOME_CONVERSION_FROM_APC_C_CDC20_TO_APC_C_CDH1_IN_LATE_ANAPHASE	20	0.671504	1.74778	0.00823229	0.0444579	0.0330108	1020	tags=15%, list=3%, signal=15%	CDC20/UBE2C/UBE2S
BIOCARTA_GH_PATHWAY	BIOCARTA_GH_PATHWAY	27	-0.574498	-1.65184	0.00822543	0.0444579	0.0330108	3199	tags=26%, list=9%, signal=24%	PIK3R1/PRKCA/PIK3CG/STAT5B/STAT5A/SLC2A4/HNF1A
REACTOME_TRNA_PROCESSING_IN_THE_NUCLEUS	REACTOME_TRNA_PROCESSING_IN_THE_NUCLEUS	58	0.504051	1.62188	0.0083807	0.0451626	0.0335341	11850	tags=59%, list=34%, signal=39%	RAN/NUP188/NDC1/NUP107/NUP62/NUP85/NUP155/RPP40/TSEN54/ZBTB8OS/CPSF1/NUP35/NUP160/TSEN34/NUP58/NUP93/RPP21/NUP210/RAE1/NUP205/NUP214/NUP98/TPR/NUP50/NUP153/POP1/NUP37/CPSF4/RPP25/NUP54/RPP30/RTCB/RTRAF/NUP133
BIOCARTA_FIBRINOLYSIS_PATHWAY	BIOCARTA_FIBRINOLYSIS_PATHWAY	12	-0.72194	-1.69911	0.00850933	0.045758	0.0339762	2355	tags=42%, list=7%, signal=39%	PLAT/FGB/FGG/F2/FGA
KEGG_CALCIUM_SIGNALING_PATHWAY	KEGG_CALCIUM_SIGNALING_PATHWAY	178	-0.340406	-1.37996	0.0085332	0.0457888	0.033999	3845	tags=26%, list=11%, signal=24%	MYLK/SLC8A1/GRIN2A/HTR2A/CAMK2D/ADCY7/NOS3/GNA15/HTR4/PRKCA/GNA14/CACNA1G/PLCZ1/PLCD1/PLCE1/PTAFR/ATP2A3/CYSLTR2/ATP2B3/GRPR/PLCB2/P2RX6/SLC25A4/TNNC2/PRKACG/CYSLTR1/CCKBR/DRD5/ADRB3/ADRB2/CAMK2A/PHKG1/PLN/TACR1/CALML5/NOS1/CACNA1F/GRM5/CHP2/P2RX1/PTGER3/HTR2B/ADCY8/TNNC1/ERBB4/ERBB3/ADCY2
WP_TGFBETA_SIGNALING_PATHWAY	WP_TGFBETA_SIGNALING_PATHWAY	132	0.417032	1.5157	0.00858005	0.0459424	0.0341131	7705	tags=23%, list=22%, signal=18%	TERT/MMP12/TNC/CCNB2/MMP1/CDK1/ITGB3/FN1/COL1A2/RUNX2/TGFBR1/RBL1/MYC/PDK1/PJA1/FOSB/KLF6/TFDP1/TGFB1I1/ATF3/TGFBR3/FOXH1/SIK1/TGIF1/FOS/SUMO1/UCHL5/JUN/CAV1/NEDD4L
REACTOME_SYNTHESIS_OF_BILE_ACIDS_AND_BILE_SALTS	REACTOME_SYNTHESIS_OF_BILE_ACIDS_AND_BILE_SALTS	34	-0.529862	-1.59796	0.00867307	0.0463421	0.0344099	4480	tags=38%, list=13%, signal=33%	OSBPL1A/HSD3B7/CYP27A1/CYP7A1/AKR1C1/CYP8B1/AKR1C2/CH25H/CYP7B1/AKR1C3/ACOX2/AKR1D1/SLC27A2
REACTOME_SUMOYLATION_OF_CHROMATIN_ORGANIZATION_PROTEINS	REACTOME_SUMOYLATION_OF_CHROMATIN_ORGANIZATION_PROTEINS	71	0.463828	1.55398	0.00869282	0.0463495	0.0344153	11158	tags=59%, list=32%, signal=40%	CBX2/H4C5/H4C9/H4C1/H4C4/NUP188/H4C8/NDC1/NUP107/NUP62/H4C3/PHC2/NUP85/NUP155/HDAC4/HDAC2/CBX8/SUMO1/RNF2/NUP35/SUMO2/NUP160/HDAC1/NUP58/NUP93/NUP210/RAE1/SUMO3/SUZ12/NUP205/NUP214/NUP98/TPR/H4C15/NUP50/NUP153/NUP37/H4C12/SCMH1/H4C14/PHC1/NUP54
REACTOME_MASTL_FACILITATES_MITOTIC_PROGRESSION	REACTOME_MASTL_FACILITATES_MITOTIC_PROGRESSION	10	0.758102	1.67287	0.00889537	0.0473294	0.0351429	6241	tags=50%, list=18%, signal=41%	CDK1/CCNB1/MASTL/PPP2R1A/PPP2R1B
WP_COMPLEMENT_ACTIVATION	WP_COMPLEMENT_ACTIVATION	22	-0.620868	-1.66694	0.00902016	0.0478923	0.0355609	5340	tags=50%, list=16%, signal=42%	C1R/C8B/CFD/CD55/C6/C9/C7/C4B/C4A/C3/MASP1
REACTOME_ELASTIC_FIBRE_FORMATION	REACTOME_ELASTIC_FIBRE_FORMATION	44	0.543155	1.65047	0.00913537	0.0484021	0.0359395	5647	tags=43%, list=16%, signal=36%	BMP7/ELN/MFAP2/ITGB3/FN1/FBN2/EMILIN1/LTBP2/MFAP5/GDF5/LTBP1/LOXL2/TGFB3/EMILIN3/ITGB8/EMILIN2/TGFB2/FBN1/LOX
PID_CIRCADIAN_PATHWAY	PID_CIRCADIAN_PATHWAY	16	0.687716	1.71276	0.00916871	0.0484639	0.0359854	4080	tags=31%, list=12%, signal=28%	CHEK1/DELEC1/TIMELESS/NPAS2/WDR5
REACTOME_NCAM1_INTERACTIONS	REACTOME_NCAM1_INTERACTIONS	42	0.547264	1.6411	0.00918547	0.0484639	0.0359854	2499	tags=33%, list=7%, signal=31%	COL2A1/GDNF/ST8SIA2/COL5A3/NCAN/COL5A1/COL3A1/COL5A2/COL6A3/COL4A2/ARTN/ST8SIA4/COL4A1/COL9A1
WP_CHOLESTASIS	WP_CHOLESTASIS	19	0.653672	1.6871	0.0093218	0.04869	0.0361532	4194	tags=47%, list=12%, signal=42%	SLCO1A2/ABCB11/NR1I3/LDLR/HMGCR/ABCC2/SCARB1/ABCG5/SLC22A1
KEGG_NUCLEOTIDE_EXCISION_REPAIR	KEGG_NUCLEOTIDE_EXCISION_REPAIR	44	0.542622	1.64885	0.0092707	0.04869	0.0361532	10370	tags=57%, list=30%, signal=40%	POLE2/POLD1/LIG1/RFC4/RFC3/RFC2/RFC5/POLD3/RPA4/PCNA/POLE/POLE4/RPA2/POLE3/RPA3/POLD2/ERCC2/ERCC1/RBX1/GTF2H2/GTF2H3/RAD23B/DDB2/ERCC3/RAD23A
KEGG_PHENYLALANINE_METABOLISM	KEGG_PHENYLALANINE_METABOLISM	18	-0.63836	-1.64298	0.00932485	0.04869	0.0361532	2916	tags=50%, list=8%, signal=46%	MIF/TAT/ALDH3B1/ALDH3A1/DDC/MAOA/MAOB/PAH/ALDH3B2
PID_P53_REGULATION_PATHWAY	PID_P53_REGULATION_PATHWAY	59	0.487984	1.57757	0.00932083	0.04869	0.0361532	6583	tags=32%, list=19%, signal=26%	CCNA2/CHEK1/CDKN2A/CDK2/SMYD2/TP53AIP1/CHEK2/DYRK2/SKP2/KMT5A/CSE1L/TRIM28/RPL11/DAXX/NEDD8/RASSF1/CSNK1G2/CSNK1E/PRMT5
REACTOME_CONSTITUTIVE_SIGNALING_BY_ABERRANT_PI3K_IN_CANCER	REACTOME_CONSTITUTIVE_SIGNALING_BY_ABERRANT_PI3K_IN_CANCER	78	-0.39869	-1.43514	0.00925877	0.04869	0.0361532	6748	tags=41%, list=20%, signal=33%	FGF1/KIT/VAV1/LCK/KITLG/PIK3CD/FGF4/PIK3CB/PDGFRA/SRC/GAB1/NRG3/IRS2/CD86/CD19/KL/PIK3R1/NRG2/NRG1/FGF17/FGF3/FLT3/BTC/HGF/MET/EGF/PIK3AP1/FGFR3/TRAT1/ERBB4/KLB/ERBB3
REACTOME_HIV_LIFE_CYCLE	REACTOME_HIV_LIFE_CYCLE	149	0.399228	1.47631	0.00934649	0.0487022	0.0361622	10426	tags=44%, list=30%, signal=31%	TAF7L/FEN1/ELOA2/LIG1/RCC1/RAN/NUP188/RANBP1/RPS27A/NDC1/HMGA1/NUP107/NUP62/TAF5/NUP85/POLR2D/NELFB/NUP155/RANGAP1/NCBP1/SUPT16H/TAF13/SSRP1/UBA52/POLR2G/ELOA/PSIP1/XPO1/TAF9/PPIA/POLR2L/CHMP4A/ERCC2/XRCC5/GTF2E2/NEDD4L/NUP35/NUP160/RNGTT/XRCC6/TAF11/NUP58/NUP93/POLR2H/GTF2A2/TAF12/NUP210/GTF2H2/GTF2H3/RAE1/CHMP5/CCNT1/TAF2/POLR2F/NUP205/NUP214/NUP98/TAF10/TPR/NUP50/NUP153/NUP37/ERCC3/GTF2A1/MVB1…
REACTOME_SYNTHESIS_OF_PROSTAGLANDINS_PG_AND_THROMBOXANES_TX	REACTOME_SYNTHESIS_OF_PROSTAGLANDINS_PG_AND_THROMBOXANES_TX	15	-0.667606	-1.66121	0.00942541	0.0489457	0.0363431	2788	tags=40%, list=8%, signal=37%	TBXAS1/CYP8B1/PTGS1/AKR1C3/HPGDS/PTGDS
REACTOME_PEROXISOMAL_LIPID_METABOLISM	REACTOME_PEROXISOMAL_LIPID_METABOLISM	29	-0.558739	-1.61017	0.00943204	0.0489457	0.0363431	6897	tags=59%, list=20%, signal=47%	ACOX1/MLYCD/HSD17B4/PECR/AMACR/CROT/ALDH3A2/ACOX3/ACOT6/PHYH/EHHADH/DECR2/NUDT7/ACBD4/ACOXL/ACOX2/SLC27A2
REACTOME_SHC1_EVENTS_IN_ERBB2_SIGNALING	REACTOME_SHC1_EVENTS_IN_ERBB2_SIGNALING	22	-0.613656	-1.64758	0.00950773	0.0492371	0.0365595	4468	tags=36%, list=13%, signal=32%	NRG3/NRG2/PRKCA/NRG1/BTC/EGF/ERBB4/ERBB3
PID_ERBB4_PATHWAY	PID_ERBB4_PATHWAY	38	-0.52048	-1.61438	0.0097417	0.0503454	0.0373824	7686	tags=37%, list=22%, signal=29%	TAB2/MAPK3/PIK3CD/PIK3CB/NRG3/PRLR/PIK3R1/NRG2/NRG1/STAT5B/LRIG1/STAT5A/BTC/ERBB4
REACTOME_INTERCONVERSION_OF_NUCLEOTIDE_DI_AND_TRIPHOSPHATES	REACTOME_INTERCONVERSION_OF_NUCLEOTIDE_DI_AND_TRIPHOSPHATES	29	0.579422	1.62773	0.00983244	0.0507105	0.0376535	9239	tags=45%, list=27%, signal=33%	RRM2/TYMS/DTYMK/RRM1/CMPK1/AK4/NME4/DUT/AK2/AK7/AK8/GUK1/DCTPP1
WP_TCELL_ANTIGEN_RECEPTOR_TCR_PATHWAY_DURING_STAPHYLOCOCCUS_AUREUS_INFECTION	WP_TCELL_ANTIGEN_RECEPTOR_TCR_PATHWAY_DURING_STAPHYLOCOCCUS_AUREUS_INFECTION	62	-0.438025	-1.50738	0.00994248	0.0511733	0.0379971	8089	tags=42%, list=23%, signal=32%	CD28/IL10/PTPN6/MAPK3/IL5/MAPK9/RRAS/CD3D/LCK/NFATC2/IKBKB/LAT/NFKBIA/CD8A/IL2/ZAP70/CTLA4/LCP2/CD4/PDCD1/CSF2/TNF/GRAP2/ITK/CD40LG/PTPRC
REACTOME_FOXO_MEDIATED_TRANSCRIPTION_OF_OXIDATIVE_STRESS_METABOLIC_AND_NEURONAL_GENES	REACTOME_FOXO_MEDIATED_TRANSCRIPTION_OF_OXIDATIVE_STRESS_METABOLIC_AND_NEURONAL_GENES	29	-0.553793	-1.59591	0.0101118	0.0518333	0.0384872	1788	tags=17%, list=5%, signal=16%	SOD2/FBXO32/TRIM63/PPARGC1A/NPY
REACTOME_DOWNREGULATION_OF_ERBB2_SIGNALING	REACTOME_DOWNREGULATION_OF_ERBB2_SIGNALING	29	-0.553709	-1.59567	0.0101118	0.0518333	0.0384872	4468	tags=28%, list=13%, signal=24%	NRG3/AKT3/NRG2/NRG1/BTC/EGF/ERBB4/ERBB3
NABA_SECRETED_FACTORS	NABA_SECRETED_FACTORS	335	0.343236	1.37503	0.010244	0.0522981	0.0388323	4120	tags=25%, list=12%, signal=22%	FGF5/IFNE/GDF2/PTN/CCL20/CSF3/CXCL8/IL26/CCL22/S100A12/BMP7/WNT10B/CCL18/IL37/S100A7A/GDNF/INHBE/HGFAC/LEFTY2/FGF16/CXCL3/WNT5A/AMH/ANGPTL4/AREG/CXCL1/PPBP/IL36G/IL6/LEFTY1/LEP/WNT6/ARTN/IL11/CSH2/TNFSF15/S100A9/VEGFC/INHBC/WNT8B/INHA/LIF/DHH/S100P/IFNA5/EGFL6/ANGPTL3/IFNB1/IL17C/WNT2/C1QTNF9B/TNFSF13B/FGFBP3/SFRP1/NODAL/FSTL3/GDF5/GDF10/EPO/TGFB3/IFNG/CXCL13/WFIKKN2/CCL24/BMP5/WNT11/INS/S100A4/C…
KEGG_PATHWAYS_IN_CANCER	KEGG_PATHWAYS_IN_CANCER	325	0.339515	1.35763	0.010244	0.0522981	0.0388323	5031	tags=20%, list=15%, signal=17%	LAMA1/FGF5/BIRC5/E2F2/MMP1/CXCL8/RAD51/WNT10B/BRCA2/MMP9/PTGS2/RAC3/FGF16/WNT5A/RXRG/IL6/GLI2/LAMA4/WNT6/CCNE2/COL4A2/GLI1/CDKN2A/VEGFC/WNT8B/E2F1/FN1/CKS1B/CCNE1/ITGA2B/FZD8/COL4A1/WNT2/CDK2/PRKCG/PTCH2/TGFBR1/TGFB3/MSH2/SLC2A1/MYC/WNT11/DCC/FGF19/FGF10/WNT3/PGF/CCNA1/LAMA2/FGF8/TRAF2/NRAS/WNT4/FZD4/EGLN3/SKP2/FZD2/MSH6/GLI3/STAT1/TGFB2/FGF23/FGFR1/RALB
REACTOME_INHIBITION_OF_REPLICATION_INITIATION_OF_DAMAGED_DNA_BY_RB1_E2F1	REACTOME_INHIBITION_OF_REPLICATION_INITIATION_OF_DAMAGED_DNA_BY_RB1_E2F1	13	0.713628	1.6606	0.0103268	0.0523561	0.0388754	6566	tags=62%, list=19%, signal=50%	E2F1/PRIM1/POLA2/PRIM2/PPP2R1A/TFDP1/PPP2R1B/POLA1
REACTOME_DAP12_SIGNALING	REACTOME_DAP12_SIGNALING	29	-0.552355	-1.59177	0.0102818	0.0523561	0.0388754	6440	tags=48%, list=19%, signal=39%	VAV3/LCK/B2M/LAT/PIK3CB/HLA-E/TYROBP/KLRD1/LCP2/PIK3R1/TREM2/BTK/GRAP2/SYK
WP_PROXIMAL_TUBULE_TRANSPORT	WP_PROXIMAL_TUBULE_TRANSPORT	57	0.492921	1.5771	0.0103384	0.0523561	0.0388754	5592	tags=39%, list=16%, signal=32%	SLC22A11/SLC22A2/SLC5A1/ATP6V1B1/ATP6V0A4/SLC1A1/SLC9A3/SLC26A6/SLC2A2/ATP6V0D2/CA4/CA2/SLC2A1/SLC22A8/ABCC2/SLC7A9/SLC7A7/SLC34A3/SLC34A1/SLC6A18/SLC5A2/ABCC4
REACTOME_SUMOYLATION	REACTOME_SUMOYLATION	187	0.372384	1.41752	0.0103292	0.0523561	0.0388754	9690	tags=41%, list=28%, signal=30%	BIRC5/AURKB/CDCA8/TOP2A/BLM/AURKA/BRCA1/CBX2/H4C5/TFAP2A/CDKN2A/EID3/H4C9/DNMT3A/VDR/H4C1/DNMT1/H4C4/TFAP2C/PGR/NUP188/H4C8/NDC1/SAE1/NR1H3/PCNA/HIC1/NUP107/NUP62/H4C3/INCENP/PHC2/NUP85/NUP155/RANGAP1/TRIM28/UBA2/DAXX/DNMT3B/NOP58/FOXL2/HDAC4/TDG/HDAC2/MDC1/PPARG/CBX8/SUMO1/SMC5/RNF2/NR5A1/SENP1/HDAC7/SMC1A/NUP35/RNF168/SUMO2/NUP160/HDAC1/NUP58/NUP93/SMC6/PARP1/PIAS4/NR1H4/NUP210/MTA1/HNRNPC/RAE1…
BIOCARTA_AKAP95_PATHWAY	BIOCARTA_AKAP95_PATHWAY	11	0.717037	1.62132	0.0104043	0.0525845	0.039045	1985	tags=27%, list=6%, signal=26%	CDK1/CCNB1/NCAPD2
BIOCARTA_AMI_PATHWAY	BIOCARTA_AMI_PATHWAY	20	-0.648346	-1.71112	0.0105077	0.0527011	0.0391315	3207	tags=45%, list=9%, signal=41%	F7/F10/PLAT/FGB/COL4A4/COL4A3/FGG/F2/FGA
REACTOME_RHO_GTPASES_ACTIVATE_IQGAPS	REACTOME_RHO_GTPASES_ACTIVATE_IQGAPS	32	0.582738	1.66956	0.010511	0.0527011	0.0391315	6471	tags=38%, list=19%, signal=30%	IQGAP3/TUBA3C/TUBB2B/TUBB6/TUBB2A/TUBB3/TUBB4B/TUBA1B/TUBB1/TUBA1C/TUBA8/TUBA3D
WP_HOMOLOGOUS_RECOMBINATION	WP_HOMOLOGOUS_RECOMBINATION	13	0.712217	1.65731	0.0104654	0.0527011	0.0391315	3403	tags=38%, list=10%, signal=35%	RAD51/BRCA2/POLD1/RAD54B/POLD3
REACTOME_NCAM_SIGNALING_FOR_NEURITE_OUT_GROWTH	REACTOME_NCAM_SIGNALING_FOR_NEURITE_OUT_GROWTH	63	0.476901	1.56914	0.0104941	0.0527011	0.0391315	5335	tags=35%, list=15%, signal=30%	COL2A1/GDNF/ST8SIA2/COL5A3/NCAN/COL5A1/COL3A1/COL5A2/COL6A3/COL4A2/ARTN/ST8SIA4/COL4A1/COL9A1/COL6A2/SPTA1/NRAS/CACNB1/FGFR1/CACNA1I/SPTBN5/CACNB3
SA_MMP_CYTOKINE_CONNECTION	SA_MMP_CYTOKINE_CONNECTION	15	-0.661221	-1.64533	0.0105532	0.0528079	0.0392109	4725	tags=60%, list=14%, signal=52%	SELL/ACE/TNFRSF8/IL6R/TNF/CSF1/IL1B/SPN/TNFSF8
WP_CANCER_IMMUNOTHERAPY_BY_CTLA4_BLOCKADE	WP_CANCER_IMMUNOTHERAPY_BY_CTLA4_BLOCKADE	14	-0.682722	-1.66064	0.0105986	0.0529298	0.0393014	8089	tags=57%, list=23%, signal=44%	CD28/PTPN6/PIK3CD/PIK3CB/CD86/CTLA4/PIK3R1/HLA-DRB1
PID_EPHA_FWDPATHWAY	PID_EPHA_FWDPATHWAY	34	0.559394	1.62165	0.0107002	0.0533318	0.0395998	2998	tags=24%, list=9%, signal=22%	EFNA2/EPHA5/NGEF/EFNA5/EPHA7/EPHA3/EPHA6/EPHA4
REACTOME_NEUTROPHIL_DEGRANULATION	REACTOME_NEUTROPHIL_DEGRANULATION	476	-0.278171	-1.24883	0.010953	0.0544841	0.0404554	6340	tags=26%, list=18%, signal=22%	BRI3/GM2A/LAMP2/MME/GSTP1/HLA-C/SCAMP1/PLEKHO2/MLEC/GHDC/DOCK2/ITGAX/SNAP23/B2M/CTSZ/DSC1/ATG7/BST1/LAMTOR3/FCER1G/PRCP/METTL7A/PRG2/ARG1/CTSD/CNN2/MGAM/ARHGAP45/HVCN1/CD33/PSAP/MANBA/MIF/CFD/RNASET2/CREG1/LGALS3/CD36/CDA/DNASE1L1/TMBIM1/CD53/SIRPA/VAT1/HP/CTSS/IQGAP2/CD55/TRPM2/DSP/ITGB2/LAIR1/HLA-B/TYROBP/SVIP/CLEC5A/ENPP4/CTSH/MVP/ALOX5/HLA-A/ALDH3B1/CLEC12A/PTAFR/CYBA/SERPINA3/TLR2/BIN2/NCKAP…
REACTOME_SIGNALING_BY_TGFB_FAMILY_MEMBERS	REACTOME_SIGNALING_BY_TGFB_FAMILY_MEMBERS	122	0.400639	1.44106	0.0109909	0.0545653	0.0405157	8056	tags=34%, list=23%, signal=26%	GDF2/GREM2/AMH/ITGB3/CER1/LTBP2/COL1A2/FSTL3/PMEPA1/LTBP1/TGFBR1/TGFB3/RBL1/MYC/YBX1/SERPINE1/RPS27A/ITGB8/NOG/CDK8/ATP1B4/TGIF2/STAT1/TGFB2/TFDP1/PPP1CA/FBN1/PARD3/NEDD8/UBA52/FOXH1/XPO1/CCNC/TGIF1/PPP1CC/USP15/UCHL5/ACVRL1/NEDD4L/FKBP1A/HDAC1
PID_PI3KCI_PATHWAY	PID_PI3KCI_PATHWAY	48	-0.46993	-1.52652	0.0111061	0.0550287	0.0408598	8227	tags=40%, list=24%, signal=30%	PLEKHA2/HCK/FOXO3/LCK/PIK3CD/LAT/PIK3CB/SRC/ZAP70/BLNK/ADAP1/PIK3R1/PIK3CG/PIK3R5/ARAP3/BTK/DAPP1/SYK/ITK
BIOCARTA_ATM_PATHWAY	BIOCARTA_ATM_PATHWAY	20	0.663337	1.72652	0.0111377	0.0550773	0.0408959	801	tags=20%, list=2%, signal=20%	TP73/RAD51/CHEK1/BRCA1
WP_ATM_SIGNALING_IN_DEVELOPMENT_AND_DISEASE	WP_ATM_SIGNALING_IN_DEVELOPMENT_AND_DISEASE	45	0.524861	1.59801	0.0112192	0.0552208	0.0410024	8300	tags=47%, list=24%, signal=35%	AURKB/CDK1/BUB1/CHEK1/H2AX/CHEK2/LBR/DCLRE1C/TRIM28/HMGN1/HDAC4/RBBP8/CDK5R1/MDC1/PRKDC/PPP5C/MRE11/SMC1A/RNF168/RIF1/MTOR
WP_ECTODERM_DIFFERENTIATION	WP_ECTODERM_DIFFERENTIATION	139	0.396466	1.45649	0.0112325	0.0552208	0.0410024	4640	tags=19%, list=13%, signal=17%	FOXA2/KRT6A/SORCS1/LHX1/VAX2/SOX2/TFAP2A/PAX6/ELOVL2/HMGB2/ARHGDIG/GREB1/ST8SIA4/FZD8/PLXNA2/H2BC9/MAFB/NLGN1/TFAP2C/TCF3/MYC/FHL2/FZD4/CTNND2/SGSM3/SPRY2/GLI3
WP_NRF2_PATHWAY	WP_NRF2_PATHWAY	141	-0.35702	-1.39994	0.0112211	0.0552208	0.0410024	5467	tags=28%, list=16%, signal=24%	SLC6A4/SLC6A14/SLC2A13/SLC5A9/GSTA5/GSTA1/SLC39A12/G6PD/SLC5A11/SOD3/SLC6A17/SLC2A8/MGST2/GSTM5/SLC39A14/GPX3/NRG1/CES4A/TGFBR2/CYP4A11/ALDH3A1/SLC6A2/ADH7/SQSTM1/HGF/SLC6A20/SERPINA1/UGT1A6/SLC6A3/CYP2A6/SLC5A8/GSTM1/SLC2A4/SLC2A5/GSTA2/SLC6A1/UGT1A9/CES1/UGT1A1/UGT1A7
REACTOME_RHOB_GTPASE_CYCLE	REACTOME_RHOB_GTPASE_CYCLE	70	0.466952	1.55741	0.011288	0.0553857	0.0411249	3138	tags=21%, list=9%, signal=20%	IQGAP3/PCDH7/ANLN/DIAPH3/RACGAP1/DEPDC1B/TFRC/ECT2/DLC1/CIT/ARHGDIG/PKN3/ARHGEF25/SOWAHC/ARHGEF2
PID_BETA_CATENIN_NUC_PATHWAY	PID_BETA_CATENIN_NUC_PATHWAY	79	0.452453	1.52743	0.0114177	0.0559136	0.0415169	4633	tags=27%, list=13%, signal=23%	TERT/SFN/PITX2/IGF2BP1/CXCL8/MMP9/DKK1/CDKN2A/MYOG/TBXT/SP5/CDX1/NEUROG1/MYC/SSPOP/DKK4/CAMK4/TLE1/RUVBL2/INCENP/YWHAQ
REACTOME_RESPIRATORY_ELECTRON_TRANSPORT_ATP_SYNTHESIS_BY_CHEMIOSMOTIC_COUPLING_AND_HEAT_PRODUCTION_BY_UNCOUPLING_PROTEINS	REACTOME_RESPIRATORY_ELECTRON_TRANSPORT_ATP_SYNTHESIS_BY_CHEMIOSMOTIC_COUPLING_AND_HEAT_PRODUCTION_BY_UNCOUPLING_PROTEINS	115	-0.385831	-1.47705	0.0116501	0.0569408	0.0422796	14062	tags=54%, list=41%, signal=32%	TACO1/ACAD9/NDUFS3/COX5A/NDUFA8/COX11/SCO1/NDUFS4/NDUFV1/COX20/TIMMDC1/TMEM186/NDUFB7/NDUFB2/ATP5PD/NDUFB11/ATP5MF/SDHD/ATP5F1D/NDUFA9/SDHC/NDUFAF4/UCP2/ATP5F1A/UQCRQ/NDUFC2/COX5B/ATP5MC1/ATP5PO/COX6A1/DMAC2L/SLC25A14/COX4I1/NDUFS7/ETFB/NDUFA2/NDUFB4/COX6B1/NDUFS2/UQCRC1/UQCRB/ATP5ME/NDUFA4/NDUFB8/NDUFAF1/UCP1/NDUFB10/COX6C/NDUFA5/COX7C/COX18/COQ10A/SDHA/NDUFC1/UQCRC2/NDUFA3/ETFDH/NDUFAF3/COX7B/C…
WP_PLATELETMEDIATED_INTERACTIONS_WITH_VASCULAR_AND_CIRCULATING_CELLS	WP_PLATELETMEDIATED_INTERACTIONS_WITH_VASCULAR_AND_CIRCULATING_CELLS	17	-0.650477	-1.64688	0.0118166	0.0575315	0.0427182	2620	tags=53%, list=8%, signal=49%	CCL5/TLR2/CD40/TLR7/SELPLG/CD40LG/IL1B/SELP/CCL2
REACTOME_ACYL_CHAIN_REMODELLING_OF_PE	REACTOME_ACYL_CHAIN_REMODELLING_OF_PE	29	-0.548048	-1.57936	0.0118112	0.0575315	0.0427182	6352	tags=55%, list=18%, signal=45%	PNPLA8/PLA2G4B/PLAAT2/PLAAT3/PLAAT1/PLA2R1/PLA2G12A/PLAAT4/PLA2G4F/PLA2G4C/PLA2G2F/PLA2G4E/PLA2G3/PLA2G2D/PLAAT5/PLA2G2A
REACTOME_ACTIVATION_OF_AMPK_DOWNSTREAM_OF_NMDARS	REACTOME_ACTIVATION_OF_AMPK_DOWNSTREAM_OF_NMDARS	29	0.572247	1.60757	0.0119441	0.0580404	0.0430961	6471	tags=41%, list=19%, signal=34%	TUBA3C/TUBB2B/TUBB6/TUBB2A/TUBB3/TUBB4B/TUBA1B/TUBB1/TUBA1C/TUBA8/MAPT/TUBA3D
WP_ENDOTHELIN_PATHWAYS	WP_ENDOTHELIN_PATHWAYS	32	-0.534371	-1.58646	0.0121234	0.0587987	0.0436591	3845	tags=31%, list=11%, signal=28%	RAMP1/MYLK/EDN1/NOS3/GNA15/PRKCA/NPY1R/MYL1/RIIAD1/NPY
BIOCARTA_IL7_PATHWAY	BIOCARTA_IL7_PATHWAY	16	-0.647958	-1.60874	0.0122148	0.059039	0.0438375	6394	tags=56%, list=19%, signal=46%	LCK/IL7R/IL7/BCL2/PIK3R1/PIK3CG/STAT5B/JAK3/STAT5A
KEGG_FOLATE_BIOSYNTHESIS	KEGG_FOLATE_BIOSYNTHESIS	11	0.708808	1.60272	0.0122198	0.059039	0.0438375	2455	tags=45%, list=7%, signal=42%	GGH/ALPL/DHFR/ALPP/ALPI
PID_P38_GAMMA_DELTA_PATHWAY	PID_P38_GAMMA_DELTA_PATHWAY	11	0.708056	1.60102	0.0124991	0.060273	0.0447538	1348	tags=18%, list=4%, signal=17%	STMN1/MAPK12
WP_ARRHYTHMOGENIC_RIGHT_VENTRICULAR_CARDIOMYOPATHY	WP_ARRHYTHMOGENIC_RIGHT_VENTRICULAR_CARDIOMYOPATHY	75	-0.407099	-1.45769	0.0125262	0.0602883	0.0447652	4310	tags=27%, list=13%, signal=23%	PKP2/CACNG1/DMD/SLC8A1/DSP/ITGB7/LEF1/CTNNA2/SGCG/CACNA2D4/DSC2/CACNG4/ITGB4/CTNNA3/ACTN3/SGCA/CACNA1F/DES/CACNG5/CACNG7
WP_NUCLEOTIDE_EXCISION_REPAIR	WP_NUCLEOTIDE_EXCISION_REPAIR	44	0.530624	1.61239	0.0127895	0.0614381	0.0456189	10370	tags=55%, list=30%, signal=38%	POLE2/POLD1/LIG1/RFC4/RFC3/RFC2/RFC5/POLD3/PCNA/POLE/POLE4/RPA2/POLE3/RPA3/POLD2/ERCC2/ERCC1/RBX1/GTF2H2/GTF2H3/RAD23B/DDB2/ERCC3/RAD23A
REACTOME_POSTMITOTIC_NUCLEAR_PORE_COMPLEX_NPC_REFORMATION	REACTOME_POSTMITOTIC_NUCLEAR_PORE_COMPLEX_NPC_REFORMATION	27	0.597706	1.64854	0.0129658	0.0621241	0.0461283	10286	tags=67%, list=30%, signal=47%	RCC1/RAN/NUP188/NDC1/NUP107/NUP62/NUP85/NUP155/RANGAP1/KPNB1/SUMO1/NUP35/NUP160/NUP58/NUP93/NUP205/NUP98/NUP37
WP_PATHWAYS_AFFECTED_IN_ADENOID_CYSTIC_CARCINOMA	WP_PATHWAYS_AFFECTED_IN_ADENOID_CYSTIC_CARCINOMA	65	0.469206	1.55752	0.0129815	0.0621241	0.0461283	3068	tags=17%, list=9%, signal=15%	UHRF1/CHEK1/FGF16/BRCA1/H1-4/FGFR4/MYBL1/H2AC16/INSRR/CHEK2/MYC
REACTOME_FORMATION_OF_TUBULIN_FOLDING_INTERMEDIATES_BY_CCT_TRIC	REACTOME_FORMATION_OF_TUBULIN_FOLDING_INTERMEDIATES_BY_CCT_TRIC	26	0.606025	1.65731	0.0130531	0.0622957	0.0462557	7983	tags=62%, list=23%, signal=47%	TUBA3C/TUBB2B/TUBB6/TUBB2A/TUBB3/TUBB4B/CCT2/TUBA1B/CCT4/TUBB1/TUBA1C/TUBA8/TUBA3D/CCT3/CCT7/CCT5
REACTOME_SIGNALING_BY_TGF_BETA_RECEPTOR_COMPLEX	REACTOME_SIGNALING_BY_TGF_BETA_RECEPTOR_COMPLEX	93	0.417826	1.45512	0.0130668	0.0622957	0.0462557	9547	tags=43%, list=28%, signal=31%	ITGB3/LTBP2/COL1A2/PMEPA1/LTBP1/TGFBR1/TGFB3/RBL1/MYC/YBX1/SERPINE1/RPS27A/ITGB8/CDK8/ATP1B4/TGIF2/STAT1/TGFB2/TFDP1/PPP1CA/FBN1/PARD3/NEDD8/UBA52/XPO1/CCNC/TGIF1/PPP1CC/USP15/UCHL5/NEDD4L/FKBP1A/HDAC1/WWTR1/PARP1/SNW1/CCNT1/UBE2M/SMAD2/LTBP4
WP_MALIGNANT_PLEURAL_MESOTHELIOMA	WP_MALIGNANT_PLEURAL_MESOTHELIOMA	438	0.326721	1.33381	0.0132748	0.0631679	0.0469034	3979	tags=16%, list=12%, signal=15%	LIN28B/CDH10/EFNA2/LAMA1/FGF5/TERT/TNNT1/UHRF1/CSF3/FOXM1/KIF23/WNT10B/MMP9/MMP14/DKK1/EZH2/WNT5A/BRCA1/AREG/CXCL1/IL6/LAMA4/NTRK2/WNT6/COL4A2/ITGB3/EFNA5/FGFR4/CDKN2A/VEGFC/E2F1/FN1/FABP4/SLC7A5/CCNE1/CDH11/MAD2L1/CIT/CER1/FZD8/COL4A1/WNT2/TEAD4/FOSL1/BARD1/CDK2/SFRP1/SPARC/NDRG1/EIF4EBP1/ADAMTS1/SERPINF1/SLC2A1/MYC/WNT11/INS/PDK1/FGF19/FGF10/WNT3/PGF/WWC1/CDH24/CTHRC1/LAMA2/PLAU/AGER/FGF8/DKK4/…
REACTOME_VIRAL_MESSENGER_RNA_SYNTHESIS	REACTOME_VIRAL_MESSENGER_RNA_SYNTHESIS	44	0.528185	1.60498	0.0133308	0.0633151	0.0470126	10286	tags=55%, list=30%, signal=38%	NUP188/NDC1/NUP107/NUP62/NUP85/POLR2D/NUP155/POLR2G/POLR2L/NUP35/NUP160/NUP58/NUP93/POLR2H/NUP210/RAE1/POLR2F/NUP205/NUP214/NUP98/TPR/NUP50/NUP153/NUP37
WP_EICOSANOID_METABOLISM_VIA_LIPOOXYGENASES_LOX	WP_EICOSANOID_METABOLISM_VIA_LIPOOXYGENASES_LOX	29	-0.541462	-1.56038	0.0135107	0.0640487	0.0475573	4471	tags=41%, list=13%, signal=36%	EHHADH/ALOX15/CYP4F2/ALOX5/CYP4A11/CYSLTR2/FPR2/CYSLTR1/ACOX2/CYP4A22/CYP4F12/TRPA1
WP_RETINOL_METABOLISM	WP_RETINOL_METABOLISM	17	-0.645902	-1.6353	0.013585	0.0641768	0.0476524	2310	tags=41%, list=7%, signal=38%	LRAT/AOX1/CYP2A6/CYP3A7/ALDH1A1/RDH12/ADH1A
WP_STATIN_INHIBITION_OF_CHOLESTEROL_PRODUCTION	WP_STATIN_INHIBITION_OF_CHOLESTEROL_PRODUCTION	31	0.555352	1.58173	0.0135886	0.0641768	0.0476524	3993	tags=39%, list=12%, signal=34%	APOA1/PDIA2/APOA2/APOB/LPL/ACSS1/SQLE/LDLR/FDFT1/HMGCR/SCARB1/ABCG5
KEGG_NEUROACTIVE_LIGAND_RECEPTOR_INTERACTION	KEGG_NEUROACTIVE_LIGAND_RECEPTOR_INTERACTION	270	0.350542	1.37995	0.013707	0.064615	0.0479778	2929	tags=23%, list=9%, signal=21%	GPR50/HTR2C/CHRNA7/AGTR2/LHB/CGA/GABRA4/BDKRB1/GABRG1/HTR1D/GABRB1/GNRHR/UTS2R/GABRQ/GRIN2D/GRID2/HTR5A/MC5R/CHRNA2/MCHR1/NPFFR2/TBXA2R/ADRA2C/FSHR/HTR6/LEP/GPR35/CHRNA5/CHRNA1/GRIK1/LPAR2/DRD4/HCRTR2/GRIN3B/MAS1/GALR3/MLNR/DRD3/TRHR/LPAR4/CHRM3/GRIN1/S1PR5/P2RX2/GABRG2/CHRNE/GRM2/CHRM4/AVPR1B/ADORA1/MC2R/HTR1E/CNR1/GLRA2/LTB4R/BDKRB2/TACR2/MC1R/GABRR2/GRIK3/P2RX5
REACTOME_PROTEIN_FOLDING	REACTOME_PROTEIN_FOLDING	98	0.426585	1.4973	0.0138702	0.0652623	0.0484585	8767	tags=38%, list=25%, signal=28%	GNG13/TUBA3C/SPHK1/GNB3/TUBB2B/CCNE2/TUBB6/CCNE1/GNG8/FBXW10/TUBB2A/TUBB3/TUBB4B/CCT2/TUBA1B/CCT4/TUBB1/GNG4/TUBA1C/TUBA8/FBXW5/TUBA3D/WRAP53/KIFC3/CCT3/GNG5/GNG3/GNB4/CCT7/GNB1/VBP1/CCT5/PDCL/GNG12/NOP56/GAPDHS/CCT6A
WP_OMEGA9_FATTY_ACID_SYNTHESIS	WP_OMEGA9_FATTY_ACID_SYNTHESIS	14	0.689631	1.65112	0.0140343	0.0659117	0.0489407	7203	tags=71%, list=21%, signal=57%	ELOVL2/ELOVL3/ELOVL1/FASN/SCD/FADS1/FADS2/ELOVL6/ELOVL5/ACSL1
REACTOME_FORMATION_OF_FIBRIN_CLOT_CLOTTING_CASCADE	REACTOME_FORMATION_OF_FIBRIN_CLOT_CLOTTING_CASCADE	38	-0.510176	-1.58242	0.0142378	0.0667429	0.0495578	5592	tags=39%, list=16%, signal=33%	PRCP/F13A1/F9/F8/PROS1/KLKB1/F7/F10/A2M/F3/F11/FGB/FGG/F2/FGA
REACTOME_DEPOLYMERISATION_OF_THE_NUCLEAR_LAMINA	REACTOME_DEPOLYMERISATION_OF_THE_NUCLEAR_LAMINA	15	0.694418	1.68763	0.0142682	0.0667616	0.0495717	681	tags=20%, list=2%, signal=20%	CDK1/CCNB1/LMNB1
REACTOME_DISEASES_OF_MITOTIC_CELL_CYCLE	REACTOME_DISEASES_OF_MITOTIC_CELL_CYCLE	38	0.551843	1.6321	0.0144217	0.0673548	0.0500122	2189	tags=18%, list=6%, signal=17%	UBE2C/E2F2/UBE2S/CCNE2/E2F1/CCNE1/CDK2
REACTOME_INTEGRIN_SIGNALING	REACTOME_INTEGRIN_SIGNALING	27	-0.559338	-1.60825	0.0145383	0.0676487	0.0502304	2335	tags=22%, list=7%, signal=21%	RAPGEF4/FGB/APBB1IP/SYK/FGG/FGA
WP_ANGIOTENSIN_II_RECEPTOR_TYPE_1_PATHWAY	WP_ANGIOTENSIN_II_RECEPTOR_TYPE_1_PATHWAY	28	0.570114	1.58474	0.0145342	0.0676487	0.0502304	3246	tags=32%, list=9%, signal=29%	ACE2/F12/IL11/NOX4/MAS1/COL1A2/IL11RA/TGFBR1/COL1A1
BIOCARTA_CBL_PATHWAY	BIOCARTA_CBL_PATHWAY	12	-0.691964	-1.62856	0.0147122	0.0682064	0.0506445	5266	tags=42%, list=15%, signal=35%	PDGFRA/PRKCA/MET/CSF1R/EGF
REACTOME_GPCR_LIGAND_BINDING	REACTOME_GPCR_LIGAND_BINDING	455	0.310596	1.26925	0.0147075	0.0682064	0.0506445	4018	tags=23%, list=12%, signal=21%	PLPPR1/HTR2C/PLPPR5/GAL/NMU/IAPP/AGTR2/UTS2/LHB/CCL20/CGA/CXCL8/GIP/BDKRB1/TRH/CCL22/FFAR1/GNG13/WNT10B/GCG/NPW/HTR1D/GNRHR/GPRC6A/UTS2R/GNB3/CXCL3/HTR5A/WNT5A/MC5R/NPSR1/CXCL1/PPBP/CXCR1/MCHR1/NPFFR2/TBXA2R/ADRA2C/QRFP/FSHR/HTR6/GPR35/WNT6/UCN2/ACKR3/LPAR2/DRD4/HCRTR2/WNT8B/QRFPR/GALR3/MLNR/PROK2/GNG8/DRD3/TRHR/LPAR4/CHRM3/S1PR5/DHH/GRM2/CHRM4/AVPR1B/ADORA1/FZD8/MC2R/WNT2/HTR1E/CNR1/HCAR3/LTB4R/…
REACTOME_NEGATIVE_REGULATION_OF_NOTCH4_SIGNALING	REACTOME_NEGATIVE_REGULATION_OF_NOTCH4_SIGNALING	54	0.48205	1.52666	0.0149071	0.0689831	0.0512212	12211	tags=59%, list=35%, signal=38%	TACC3/RPS27A/PSMB7/PSMB5/PSMD14/PSMD1/UBA52/PSMB9/PSMA4/PSMA5/PSMC1/PSMC3/PSMD11/PSMA6/PSMB2/PSMA1/PSMC6/PSMD2/RBX1/PSMD13/YWHAZ/PSMA3/PSMB4/PSMD4/PSME1/PSMC4/UBC/PSME2/PSMA2/PSMD5/PSMD8/PSMA7
PID_CD8_TCR_PATHWAY	PID_CD8_TCR_PATHWAY	53	-0.46024	-1.54076	0.0149373	0.068996	0.0512308	6654	tags=40%, list=19%, signal=32%	CD3G/TRAF6/VAV1/CD3D/LCK/IKBKB/B2M/LAT/CD8A/CD8B/RASGRP1/ZAP70/CD86/LCP2/PRKCA/HLA-A/CD3E/CD247/TRPV6/GRAP2/PTPRC
KEGG_HEDGEHOG_SIGNALING_PATHWAY	KEGG_HEDGEHOG_SIGNALING_PATHWAY	56	0.500274	1.59635	0.015014	0.0692235	0.0513998	6371	tags=41%, list=19%, signal=34%	BMP7/WNT10B/WNT5A/ZIC2/GLI2/WNT6/GLI1/WNT8B/DHH/WNT2/LRP2/PTCH2/BMP5/WNT11/WNT3/WNT4/BMP8B/GLI3/WNT7A/HHIP/WNT8A/CSNK1G2/CSNK1E
WP_AUTOSOMAL_RECESSIVE_OSTEOPETROSIS_PATHWAYS	WP_AUTOSOMAL_RECESSIVE_OSTEOPETROSIS_PATHWAYS	11	-0.695274	-1.59688	0.0153157	0.0704858	0.052337	6773	tags=73%, list=20%, signal=58%	RAB7A/TRAF6/IKBKB/CLCN7/PLEKHM1/TNFSF11/TNFRSF11A/TCIRG1
REACTOME_TRNA_PROCESSING	REACTOME_TRNA_PROCESSING	108	0.409521	1.45543	0.0155452	0.0714116	0.0530244	11859	tags=48%, list=34%, signal=32%	EPRS1/ADAT3/RAN/NUP188/NDC1/NUP107/QTRT2/NUP62/NUP85/TPRKB/NUP155/RPP40/TSEN54/WDR4/TRMT1/URM1/TYW5/ZBTB8OS/CPSF1/TRMU/NUP35/METTL1/NUP160/TSEN34/NUP58/NUP93/RPP21/NUP210/RAE1/TRIT1/NUP205/NUP214/NUP98/TPR/NUP50/NUP153/GTPBP3/POP1/NUP37/CPSF4/CTU1/PUS7/PUS3/RPP25/THG1L/DUS2/NUP54/RPP30/RTCB/RTRAF/NUP133/CTU2
REACTOME_TP53_REGULATES_TRANSCRIPTION_OF_CELL_DEATH_GENES	REACTOME_TP53_REGULATES_TRANSCRIPTION_OF_CELL_DEATH_GENES	44	0.522515	1.58775	0.0156409	0.0717205	0.0532538	9565	tags=52%, list=28%, signal=38%	TP73/BIRC5/NDRG1/TP53AIP1/PERP/AIFM2/STEAP3/TP53I3/BCL2L14/PRELID3A/CASP1/PIDD1/APAF1/BAX/CRADD/TNFRSF10A/TNFRSF10B/CASP6/PRELID1/CASP2/PMAIP1/PPP1R13B/TRIAP1
NABA_ECM_REGULATORS	NABA_ECM_REGULATORS	238	0.346895	1.34889	0.0158113	0.0723704	0.0537364	3704	tags=29%, list=11%, signal=26%	MMP10/ADAMTS19/MMP12/HTRA3/CST1/MMP13/MMP1/ADAM12/TGM4/CTSV/MMP9/MMP7/MMP14/MMP17/ADAMDEC1/HPSE2/F12/KAZALD1/CELA2A/P4HA3/ADAMTS2/MMP20/MMP8/ADAMTS4/TMPRSS15/CELA2B/ADAMTS12/ADAMTS20/SERPINA12/ADAMTS14/P3H3/TIMP4/LPA/MMP23B/MEP1B/CPN2/MMP27/SERPINB2/ITIH3/PCSK6/ADAM8/SERPINB10/ADAMTS6/ELANE/ASTL/ADAM19/BMP1/P3H1/SERPINH1/ADAMTS1/LOXL2/SERPINA6/SERPINF1/SERPINB3/HYAL3/SERPINA9/MMP15/PLOD1/SERPINE1…
KEGG_T_CELL_RECEPTOR_SIGNALING_PATHWAY	KEGG_T_CELL_RECEPTOR_SIGNALING_PATHWAY	108	-0.374086	-1.41031	0.0159359	0.072785	0.0540442	8092	tags=41%, list=24%, signal=31%	NFATC1/CD28/IL10/CBLB/PTPN6/MAPK3/IL5/MAPK9/CD3G/VAV1/CD3D/NFAT5/VAV3/LCK/NFATC2/IKBKB/PIK3CD/LAT/NFKBIA/PIK3CB/CD8A/IL2/CD8B/PAK5/RASGRP1/ZAP70/AKT3/CTLA4/LCP2/PIK3R1/PAK3/PIK3CG/CD3E/PIK3R5/CD247/CD4/PDCD1/CSF2/TNF/GRAP2/ITK/CD40LG/PTPRC/CHP2
WP_FOCAL_ADHESION	WP_FOCAL_ADHESION	198	0.362931	1.38859	0.0159596	0.072785	0.0540442	4092	tags=15%, list=12%, signal=13%	COL2A1/LAMA1/TNC/IBSP/STYK1/SRMS/MYLK2/RAC3/COL5A3/COMP/COL5A2/LAMA4/COL4A2/ITGB3/VEGFC/FN1/ITGA2B/ITGA7/COL4A1/COL1A2/THBS4/PRKCG/RELN/SHC4/COL6A2/COL1A1/PGF/LAMA2/ITGB8/PTK6
REACTOME_COMMON_PATHWAY_OF_FIBRIN_CLOT_FORMATION	REACTOME_COMMON_PATHWAY_OF_FIBRIN_CLOT_FORMATION	22	-0.596417	-1.6013	0.0163337	0.0742225	0.0551116	4429	tags=32%, list=13%, signal=28%	F8/PROS1/F10/FGB/FGG/F2/FGA
WP_FARNESOID_X_RECEPTOR_PATHWAY	WP_FARNESOID_X_RECEPTOR_PATHWAY	19	-0.596876	-1.55591	0.016318	0.0742225	0.0551116	3531	tags=58%, list=10%, signal=52%	FKBP5/SLC10A1/IRS2/UGT2B4/NR0B2/CYP7A1/SLCO2B1/CYP8B1/PPARGC1A/IP6K3/CYP3A4
WP_ETHANOL_EFFECTS_ON_HISTONE_MODIFICATIONS	WP_ETHANOL_EFFECTS_ON_HISTONE_MODIFICATIONS	31	-0.52261	-1.53754	0.0166062	0.0752784	0.0558956	2719	tags=23%, list=8%, signal=21%	ALDH2/HDAC5/HDAC9/ALDH1A1/ADH1A/ADH1B/ADH1C
WP_IL1_SIGNALING_PATHWAY	WP_IL1_SIGNALING_PATHWAY	55	-0.428306	-1.44628	0.0166257	0.0752784	0.0558956	10691	tags=40%, list=31%, signal=28%	IKBKG/MAPKAPK2/NFKB1/MAP3K2/MAP2K4/TOLLIP/TAB2/MAPK3/HSPB2/MAPK9/TRAF6/IKBKB/IL1R1/NFKBIA/REL/IRAK3/IL1A/PIK3R1/SQSTM1/PELI2/IL1B/CCL2
BIOCARTA_SKP2E2F_PATHWAY	BIOCARTA_SKP2E2F_PATHWAY	10	0.736261	1.62468	0.0167344	0.0754993	0.0560596	5106	tags=60%, list=15%, signal=51%	E2F1/CCNE1/CDK2/CCNA1/SKP2/TFDP1
REACTOME_SIGNALING_BY_ERBB2	REACTOME_SIGNALING_BY_ERBB2	49	-0.467261	-1.52137	0.0167224	0.0754993	0.0560596	5139	tags=27%, list=15%, signal=23%	SRC/GAB1/NRG3/AKT3/GRB7/PIK3R1/NRG2/PRKCA/NRG1/BTC/EGF/ERBB4/ERBB3
BIOCARTA_AHSP_PATHWAY	BIOCARTA_AHSP_PATHWAY	13	0.69423	1.61546	0.0168553	0.075909	0.0563639	4630	tags=54%, list=13%, signal=47%	HBB/AHSP/ALAS2/HBA2/HBA1/GATA1/HMBS
WP_EICOSANOID_METABOLISM_VIA_CYCLOOXYGENASES_COX	WP_EICOSANOID_METABOLISM_VIA_CYCLOOXYGENASES_COX	31	-0.519787	-1.52924	0.01694	0.0761546	0.0565462	3621	tags=35%, list=11%, signal=32%	EHHADH/CYP4F2/AKR1B1/TBXAS1/CYP4A11/PTGS1/ACOX2/CYP4A22/CYP4F12/PTGDR/PTGDS
KEGG_TERPENOID_BACKBONE_BIOSYNTHESIS	KEGG_TERPENOID_BACKBONE_BIOSYNTHESIS	15	0.688889	1.67419	0.0170387	0.0764619	0.0567744	2775	tags=47%, list=8%, signal=43%	ACAT2/FDPS/HMGCS1/MVD/IDI1/MVK/HMGCR
WP_SPINAL_CORD_INJURY	WP_SPINAL_CORD_INJURY	117	0.40249	1.44013	0.0173881	0.0778912	0.0578357	3266	tags=25%, list=9%, signal=23%	COL2A1/MMP12/ACAN/CDK1/CXCL8/MMP9/GDNF/PTGS2/NCAN/CXCL1/IL6/LEP/RTN4R/NOX4/E2F1/GRIN1/ROS1/COL4A1/TNFSF13B/PLA2G5/CDK2/LTB4R/PLXNA2/IFNG/EPHA4/NTN1/XYLT1/MYC/VIM
REACTOME_LYSOSPHINGOLIPID_AND_LPA_RECEPTORS	REACTOME_LYSOSPHINGOLIPID_AND_LPA_RECEPTORS	14	0.675895	1.61823	0.0178494	0.0796746	0.0591599	3716	tags=50%, list=11%, signal=45%	PLPPR1/PLPPR5/LPAR2/S1PR5/PLPPR3/S1PR3/LPAR1
WP_LNCRNAMEDIATED_MECHANISMS_OF_THERAPEUTIC_RESISTANCE	WP_LNCRNAMEDIATED_MECHANISMS_OF_THERAPEUTIC_RESISTANCE	11	0.696603	1.57512	0.0178238	0.0796746	0.0591599	2323	tags=27%, list=7%, signal=25%	HOTAIR/WNT6/MEG3
BIOCARTA_P27_PATHWAY	BIOCARTA_P27_PATHWAY	13	0.692344	1.61107	0.0179697	0.0799286	0.0593485	6020	tags=54%, list=17%, signal=44%	E2F1/CKS1B/CCNE1/CDK2/SKP2/TFDP1/NEDD8
BIOCARTA_SPPA_PATHWAY	BIOCARTA_SPPA_PATHWAY	16	-0.630397	-1.56514	0.0179596	0.0799286	0.0593485	3146	tags=31%, list=9%, signal=28%	PRKCA/TBXAS1/PTGS1/SYK/F2
KEGG_SYSTEMIC_LUPUS_ERYTHEMATOSUS	KEGG_SYSTEMIC_LUPUS_ERYTHEMATOSUS	133	0.39981	1.45413	0.0181308	0.0805032	0.0597751	3543	tags=29%, list=10%, signal=26%	H3C2/H2AC14/H2AC12/H3C3/H2AC4/H2BC14/H2BC7/H2BC17/H3Y1/H2BC8/H4C5/H2BC4/H3C11/H2AC17/H3C7/H3C12/H2BC11/H2AX/H2BC10/H2AC16/H2BC12/H4C9/H3C8/FCGR3B/H4C1/C8G/H2BC9/ELANE/H2AC21/H4C4/H2BC6/ACTN2/H3C14/H2AC8/IFNG/H4C8/H2BC13/H2AZ1/H3C1
WP_FBXL10_ENHANCEMENT_OF_MAPERK_SIGNALING_IN_DIFFUSE_LARGE_BCELL_LYMPHOMA	WP_FBXL10_ENHANCEMENT_OF_MAPERK_SIGNALING_IN_DIFFUSE_LARGE_BCELL_LYMPHOMA	32	0.554461	1.58855	0.0182027	0.0806806	0.0599068	10772	tags=75%, list=31%, signal=52%	EZH2/H3C11/H3C7/H3C12/H2AX/H3C8/H3C14/H2AZ1/H3C1/H3C10/DUSP6/H3C4/MACROH2A2/EED/RNF2/H3-3B/PCGF1/MACROH2A1/SUZ12/H3C13/MAPK1/H3-3A/H2AZ2/H3C6
WP_IRINOTECAN_PATHWAY	WP_IRINOTECAN_PATHWAY	12	-0.678332	-1.59648	0.0183814	0.0813295	0.0603886	1327	tags=50%, list=4%, signal=48%	CYP3A5/ABCG2/UGT1A9/CES1/UGT1A1/CYP3A4
KEGG_PURINE_METABOLISM	KEGG_PURINE_METABOLISM	158	0.366672	1.36551	0.0185603	0.0819774	0.0608698	6613	tags=28%, list=19%, signal=23%	XDH/RRM2/PDE10A/ENTPD8/GUCY2F/POLE2/ADCY1/ALLC/POLD1/PRPS2/ENPP3/POLR1E/PRIM1/PDE3B/PDE4D/NT5E/ENTPD2/IMPDH1/PDE9A/PDE7B/PKLR/RRM1/POLA2/POLD3/PRIM2/POLR3D/POLE/NT5M/POLE4/PDE4C/PDE6D/PDE4B/POLE3/ADSL/POLR2D/GART/PNP/NT5C/PDE3A/POLR2G/AK4/GMPS/POLA1/NME4
REACTOME_PROCESSING_OF_CAPPED_INTRONLESS_PRE_MRNA	REACTOME_PROCESSING_OF_CAPPED_INTRONLESS_PRE_MRNA	29	0.556062	1.56211	0.018701	0.0824542	0.0612238	11127	tags=69%, list=32%, signal=47%	SYMPK/NCBP1/SNRPG/SNRPE/ZNF473/CSTF3/CPSF1/CPSF3/NUDT21/SNRPF/PAPOLA/LSM11/PABPN1/SNRPB/SLBP/SNRPD3/CPSF4/CPSF7/CPSF6/CSTF1
WP_2Q112_COPY_NUMBER_VARIATION_SYNDROME	WP_2Q112_COPY_NUMBER_VARIATION_SYNDROME	42	0.51987	1.55895	0.0187352	0.0824609	0.0612287	6874	tags=31%, list=20%, signal=25%	COL2A1/NCAPH/IL6/ASTL/GPAT2/ZP2/ANKRD23/LMAN2L/ANKRD36C/FAHD2B/SEMA4C/ADRA2B/DUSP2
REACTOME_SCF_BETA_TRCP_MEDIATED_DEGRADATION_OF_EMI1	REACTOME_SCF_BETA_TRCP_MEDIATED_DEGRADATION_OF_EMI1	55	0.47	1.49596	0.018801	0.0826063	0.0613367	10712	tags=49%, list=31%, signal=34%	CDC20/PSMA8/FBXO5/PSME4/RPS27A/PSMB7/PSMB5/PSMD14/PSMD1/UBA52/PSMB9/PSMA4/PSMA5/PSMC1/PSMC3/PSMD11/PSMA6/PSMB2/PSMA1/PSMC6/PSMD2/PSMD13/PSMA3/PSMB4/PSMD4/PSME1/PSMC4
REACTOME_DEFECTIVE_INTRINSIC_PATHWAY_FOR_APOPTOSIS	REACTOME_DEFECTIVE_INTRINSIC_PATHWAY_FOR_APOPTOSIS	25	0.580594	1.58053	0.0190042	0.0833542	0.061892	2319	tags=20%, list=7%, signal=19%	CDC25C/CDC25A/LMNB1/CDKN2A/CDC25B
BIOCARTA_SM_PATHWAY	BIOCARTA_SM_PATHWAY	14	0.672959	1.6112	0.0192119	0.0841189	0.0624598	10269	tags=93%, list=30%, signal=65%	SNRPA1/SNRPD1/SNRPG/SNRPE/SNRPA/SNRPC/SNRNP70/SNRPD2/U2AF1/SRSF2/SNRPF/SNRPB/SNRPD3
REACTOME_INTERLEUKIN_6_FAMILY_SIGNALING	REACTOME_INTERLEUKIN_6_FAMILY_SIGNALING	24	0.61599	1.66426	0.0193785	0.0845175	0.0627558	4826	tags=46%, list=14%, signal=39%	IL31RA/IL6/IL11/LIF/CNTFR/IL11RA/SOCS3/CRLF1/OSM/IL31/STAT1
REACTOME_LYSINE_CATABOLISM	REACTOME_LYSINE_CATABOLISM	12	-0.676331	-1.59177	0.0193404	0.0845175	0.0627558	7776	tags=50%, list=23%, signal=39%	GCDH/HYKK/AASS/ALDH7A1/OGDH/CRYM
REACTOME_SUMOYLATION_OF_UBIQUITINYLATION_PROTEINS	REACTOME_SUMOYLATION_OF_UBIQUITINYLATION_PROTEINS	39	0.514191	1.529	0.0194035	0.0845175	0.0627558	10286	tags=54%, list=30%, signal=38%	NUP188/NDC1/NUP107/NUP62/NUP85/NUP155/SUMO1/NUP35/NUP160/NUP58/NUP93/PIAS4/NUP210/RAE1/NUP205/NUP214/NUP98/TPR/NUP50/NUP153/NUP37
BIOCARTA_NPC_PATHWAY	BIOCARTA_NPC_PATHWAY	11	0.690429	1.56116	0.019508	0.0845206	0.0627581	10131	tags=91%, list=29%, signal=64%	KPNA2/RCC1/RAN/NUP62/RANGAP1/KPNB1/NUTF2/NUP210/NUP214/NUP153
KEGG_RNA_DEGRADATION	KEGG_RNA_DEGRADATION	59	0.464913	1.50298	0.0195197	0.0845206	0.0627581	10340	tags=51%, list=30%, signal=36%	PAPOLB/HSPD1/ENO1/LSM4/DCP2/CNOT9/LSM2/EXOSC2/LSM7/ZCCHC7/LSM1/C1DP3/EXOSC3/EXOSC10/EXOSC8/EDC3/PNPT1/ENO2/DCPS/LSM5/CNOT3/CNOT2/PAPOLA/C1D/TENT4A/LSM3/CNOT6/EXOSC4/PATL1/EXOSC5
WP_AMINO_ACID_METABOLISM	WP_AMINO_ACID_METABOLISM	91	-0.400404	-1.47678	0.0194723	0.0845206	0.0627581	6522	tags=35%, list=19%, signal=29%	SUCLG1/LARS2/ACO2/GLUL/HIBADH/ARG1/OTC/AUH/ALDH7A1/SDHA/HMGCS2/EHHADH/OGDH/PNMT/GLS/TDO2/OAT/PDHA1/TAT/DBH/ADH7/FTCD/ARG2/HNMT/DDC/MAOA/PPM1L/BHMT/ALDH1A1/ADH4/HDC/ADH1C
WP_EPITHELIAL_TO_MESENCHYMAL_TRANSITION_IN_COLORECTAL_CANCER	WP_EPITHELIAL_TO_MESENCHYMAL_TRANSITION_IN_COLORECTAL_CANCER	157	0.371998	1.38585	0.0195383	0.0845206	0.0627581	4841	tags=22%, list=14%, signal=19%	CLDN19/FOXM1/WNT10B/MMP9/EZH2/WNT5A/WNT6/COL4A2/MAPK12/WNT8B/FN1/TWIST2/MAPK11/FZD8/JAG1/COL4A1/WNT2/CLDN4/FOXC2/SPARC/CLDN14/CLDN9/TGFBR1/TGFB3/WNT11/MMP15/WNT3/CLDN6/DLL1/WNT4/FZD4/FZD2/CLDN15/PKP1/TGFB2
PID_THROMBIN_PAR4_PATHWAY	PID_THROMBIN_PAR4_PATHWAY	15	-0.630449	-1.56875	0.0199154	0.0860044	0.0638598	4307	tags=33%, list=13%, signal=29%	MYL2/GNA15/GNA14/PLCB2/F2
WP_DYRK1A	WP_DYRK1A	62	0.455567	1.49649	0.0200252	0.0863308	0.0641022	8688	tags=39%, list=25%, signal=29%	DNM1/NEUROG2/GLI1/GMNN/LIN9/AMPH/RBL1/BACE1/DLL1/SPRY2/HES1/RPTOR/TFDP1/HES5/CASP9/AKT1S1/MAPT/CASP3/CDK4/FGF2/LIN37/MTOR/RBBP4/NOTCH1
WP_2873_ARYL_HYDROCARBON_RECEPTOR_PATHWAY	WP_2873_ARYL_HYDROCARBON_RECEPTOR_PATHWAY	45	-0.474885	-1.52599	0.0202038	0.0869521	0.0645635	2702	tags=29%, list=8%, signal=27%	IL12B/SRC/IL2/IL17B/IL12A/ALDH3A1/TNF/UGT1A6/IL1B/GSTA2/UGT1A9/UGT1A1/UGT1A7
REACTOME_ABERRANT_REGULATION_OF_MITOTIC_G1_S_TRANSITION_IN_CANCER_DUE_TO_RB1_DEFECTS	REACTOME_ABERRANT_REGULATION_OF_MITOTIC_G1_S_TRANSITION_IN_CANCER_DUE_TO_RB1_DEFECTS	17	0.658843	1.65727	0.0206786	0.0887736	0.065916	2189	tags=29%, list=6%, signal=28%	E2F2/CCNE2/E2F1/CCNE1/CDK2
WP_GENES_ASSOCIATED_WITH_THE_DEVELOPMENT_OF_RHEUMATOID_ARTHRITIS	WP_GENES_ASSOCIATED_WITH_THE_DEVELOPMENT_OF_RHEUMATOID_ARTHRITIS	18	-0.611194	-1.57306	0.0206974	0.0887736	0.065916	6752	tags=67%, list=20%, signal=54%	STAT4/CCR6/TRAF1/IL6ST/PTPN22/CD244/CTLA4/CD40/IRF5/CIITA/HLA-DRB1/FCRL3
BIOCARTA_MONOCYTE_PATHWAY	BIOCARTA_MONOCYTE_PATHWAY	11	-0.683697	-1.57029	0.0208941	0.0894649	0.0664294	7681	tags=55%, list=22%, signal=42%	SELL/SELE/ITGB2/ITGAL/ITGAM/SELP
REACTOME_POST_CHAPERONIN_TUBULIN_FOLDING_PATHWAY	REACTOME_POST_CHAPERONIN_TUBULIN_FOLDING_PATHWAY	23	0.618283	1.65907	0.0210047	0.0896424	0.0665612	6471	tags=48%, list=19%, signal=39%	TUBA3C/TUBB2B/TUBB6/TUBB2A/TUBB3/TUBB4B/TUBA1B/TUBB1/TUBA1C/TUBA8/TUBA3D
REACTOME_EGR2_AND_SOX10_MEDIATED_INITIATION_OF_SCHWANN_CELL_MYELINATION	REACTOME_EGR2_AND_SOX10_MEDIATED_INITIATION_OF_SCHWANN_CELL_MYELINATION	29	-0.523408	-1.50835	0.0210066	0.0896424	0.0665612	2618	tags=24%, list=8%, signal=22%	POU3F2/SOX10/EGR2/ADGRV1/ADGRG6/MBP/GJB1
REACTOME_APOPTOSIS_INDUCED_DNA_FRAGMENTATION	REACTOME_APOPTOSIS_INDUCED_DNA_FRAGMENTATION	13	0.682876	1.58904	0.0213128	0.0906399	0.0673018	8076	tags=69%, list=23%, signal=53%	H1-5/H1-4/HMGB2/H1-2/H1-3/KPNB1/CASP3/H1-0/H1-1
KEGG_LINOLEIC_ACID_METABOLISM	KEGG_LINOLEIC_ACID_METABOLISM	29	-0.523115	-1.50751	0.0213482	0.0906399	0.0673018	3669	tags=45%, list=11%, signal=40%	ALOX15/CYP2J2/PLA2G2F/PLA2G4E/AKR1B10/CYP2C8/PLA2G3/PLA2G2C/CYP3A5/PLA2G2D/CYP3A7/PLA2G2A/CYP3A4
KEGG_DILATED_CARDIOMYOPATHY	KEGG_DILATED_CARDIOMYOPATHY	90	-0.389666	-1.43359	0.0212889	0.0906399	0.0673018	4636	tags=27%, list=13%, signal=23%	ADCY6/IGF1/MYL2/CACNG1/DMD/SLC8A1/ITGB7/ADCY7/SGCG/CACNA2D4/TNF/PRKACG/ADCY5/CACNG4/ITGB4/PLN/SGCA/CACNA1F/DES/CACNG5/CACNG7/ADCY8/TNNC1/ADCY2
REACTOME_PKA_ACTIVATION_IN_GLUCAGON_SIGNALLING	REACTOME_PKA_ACTIVATION_IN_GLUCAGON_SIGNALLING	17	-0.628449	-1.59111	0.021488	0.09108	0.0676286	6349	tags=47%, list=18%, signal=38%	PRKAR1A/GNAS/ADCY6/ADCY7/PRKACG/ADCY5/ADCY8/ADCY2
BIOCARTA_MPR_PATHWAY	BIOCARTA_MPR_PATHWAY	21	0.611502	1.62466	0.021704	0.0916876	0.0680797	4219	tags=29%, list=12%, signal=25%	CDK1/CDC25C/CCNB1/ADCY1/PGR/MYT1
REACTOME_GLUTATHIONE_CONJUGATION	REACTOME_GLUTATHIONE_CONJUGATION	35	-0.494592	-1.50852	0.0216847	0.0916876	0.0680797	8332	tags=43%, list=24%, signal=33%	GSTM3/GSTM4/MGST1/GSTM2/GSTP1/GSTA5/GSTO2/GSTA1/GSTK1/MGST2/GSTM5/GSTM1/GSTA2/HPGDS/GGT6
REACTOME_COPI_INDEPENDENT_GOLGI_TO_ER_RETROGRADE_TRAFFIC	REACTOME_COPI_INDEPENDENT_GOLGI_TO_ER_RETROGRADE_TRAFFIC	53	0.488782	1.54378	0.0219299	0.0924868	0.0686732	6471	tags=32%, list=19%, signal=26%	TUBA3C/TUBB2B/TUBB6/TUBB2A/TUBB3/TUBB4B/BICD1/GALNT2/TUBA1B/TUBB1/TUBA1C/TUBA8/DCTN2/PLA2G4A/PAFAH1B3/DCTN3/TUBA3D
KEGG_ARRHYTHMOGENIC_RIGHT_VENTRICULAR_CARDIOMYOPATHY_ARVC	KEGG_ARRHYTHMOGENIC_RIGHT_VENTRICULAR_CARDIOMYOPATHY_ARVC	74	-0.410592	-1.46171	0.0224961	0.0947164	0.0703287	4310	tags=27%, list=13%, signal=24%	PKP2/CACNG1/DMD/SLC8A1/DSP/ITGB7/LEF1/CTNNA2/SGCG/CACNA2D4/DSC2/CACNG4/ITGB4/CTNNA3/ACTN3/SGCA/CACNA1F/DES/CACNG5/CACNG7
REACTOME_LDL_CLEARANCE	REACTOME_LDL_CLEARANCE	19	0.618108	1.59531	0.0226215	0.0949276	0.0704855	2723	tags=26%, list=8%, signal=24%	APOB/SOAT2/LDLR/LIPA/CES3
KEGG_PARKINSONS_DISEASE	KEGG_PARKINSONS_DISEASE	117	-0.35505	-1.36231	0.0225863	0.0949276	0.0704855	8153	tags=30%, list=24%, signal=23%	COX4I1/NDUFS7/UBA1/NDUFA2/COX6CP3/NDUFB4/COX6B1/NDUFS2/UQCRC1/UBA7/UQCRB/NDUFA4/NDUFB8/NDUFB10/COX6C/NDUFA5/COX7C/SDHA/PRKN/PPID/NDUFC1/UQCRC2/NDUFA3/UQCR10P1/PINK1/COX7B/NDUFA1/SLC25A4/SLC6A3/SNCA/COX6A2/SLC18A2/COX7A1/SLC18A1/SNCAIP
PID_HEDGEHOG_GLI_PATHWAY	PID_HEDGEHOG_GLI_PATHWAY	48	0.490424	1.52061	0.0227201	0.0951829	0.0706751	6598	tags=25%, list=19%, signal=20%	FOXA2/GLI2/GLI1/GNAZ/SSPOP/GLI3/SIN3B/GNAI3/CSNK1G2/CSNK1E/XPO1/HDAC2
BIOCARTA_FCER1_PATHWAY	BIOCARTA_FCER1_PATHWAY	39	-0.470426	-1.46303	0.0227958	0.0953415	0.0707928	8999	tags=33%, list=26%, signal=25%	MAP2K4/NFATC3/NFATC1/MAPK3/VAV1/NFATC2/FCER1G/FCER1A/PIK3R1/PIK3CG/BTK/SYK/MS4A2
PID_SYNDECAN_3_PATHWAY	PID_SYNDECAN_3_PATHWAY	17	0.655379	1.64856	0.0228991	0.095457	0.0708786	686	tags=18%, list=2%, signal=17%	PTN/CXCL8/NCAN
REACTOME_TRANSLESION_SYNTHESIS_BY_POLH	REACTOME_TRANSLESION_SYNTHESIS_BY_POLH	19	0.616752	1.59181	0.0228991	0.095457	0.0708786	9425	tags=68%, list=27%, signal=50%	RFC4/RFC3/RFC2/RFC5/RPS27A/PCNA/RPA2/RPA3/UBA52/UFD1/POLH/VCP/SPRTN
BIOCARTA_MHC_PATHWAY	BIOCARTA_MHC_PATHWAY	12	-0.672172	-1.58198	0.0231764	0.0964536	0.0716186	2886	tags=42%, list=8%, signal=38%	HLA-A/HLA-DRB1/CD74/HLA-DRA/HLA-DRB5
WP_VITAMIN_K_METABOLISM_AND_ACTIVATION_OF_DEPENDENT_PROTEINS	WP_VITAMIN_K_METABOLISM_AND_ACTIVATION_OF_DEPENDENT_PROTEINS	12	-0.671644	-1.58074	0.0234961	0.0976229	0.0724868	5027	tags=50%, list=15%, signal=43%	VKORC1/F9/PROS1/F7/F10/F2
KEGG_BASAL_CELL_CARCINOMA	KEGG_BASAL_CELL_CARCINOMA	55	0.460301	1.46509	0.0238678	0.0990043	0.0735126	6244	tags=33%, list=18%, signal=27%	WNT10B/WNT5A/GLI2/WNT6/GLI1/WNT8B/FZD8/WNT2/PTCH2/WNT11/WNT3/WNT4/FZD4/FZD2/GLI3/WNT7A/HHIP/WNT8A
WP_ALZHEIMERS_DISEASE	WP_ALZHEIMERS_DISEASE	262	0.335298	1.31798	0.0245945	0.101851	0.0756263	6735	tags=24%, list=20%, signal=19%	CHRNA7/PPP3R2/WNT10B/TUBA3C/PTGS2/DKK1/GRIN2D/WNT5A/TUBB2B/IL6/PSMA8/LPL/WNT6/TUBB6/ATP2A1/NOX4/GRIN1/FZD8/WNT2/IRS4/RYR3/TUBB2A/CALML6/TUBB3/TUBB4B/BACE1/TUBB/WNT11/INS/WNT3/AGER/EIF2S1/DKK4/TRAF2/NRAS/WNT4/TUBA1B/FZD2/TUBB1/CALM3/CASP7/PSMB7/GRIN2C/GPR83/TUBA1C/PSMB5/WNT7A/CASP9/PSEN2/ATG101/TUBA8/PSMD14/PSMD1/DKK2/CSNK1E/MAPT/TUBA3D/CASP3/HRAS/PSMA4/KLC1/CDK5R1/APAF1
REACTOME_ASSEMBLY_AND_CELL_SURFACE_PRESENTATION_OF_NMDA_RECEPTORS	REACTOME_ASSEMBLY_AND_CELL_SURFACE_PRESENTATION_OF_NMDA_RECEPTORS	44	0.503819	1.53094	0.0248892	0.102903	0.076407	5673	tags=39%, list=16%, signal=32%	TUBA3C/GRIN2D/TUBB2B/LIN7A/TUBB6/GRIN3B/GRIN1/TUBB2A/ACTN2/TUBB3/TUBB4B/TUBA1B/GRIN3A/TUBB1/GRIN2C/TUBA1C/TUBA8
REACTOME_ORGANIC_CATION_ANION_ZWITTERION_TRANSPORT	REACTOME_ORGANIC_CATION_ANION_ZWITTERION_TRANSPORT	14	0.660325	1.58096	0.025207	0.103796	0.0770701	4194	tags=36%, list=12%, signal=31%	SLC22A11/SLC22A2/SLC22A16/SLC22A8/SLC22A1
WP_MICRORNAS_IN_CARDIOMYOCYTE_HYPERTROPHY	WP_MICRORNAS_IN_CARDIOMYOCYTE_HYPERTROPHY	90	-0.383233	-1.40992	0.0251951	0.103796	0.0770701	4562	tags=21%, list=13%, signal=18%	IGF1/IL6ST/MYLK/EDN1/CTF1/CAMK2D/PIK3R1/NRG1/PIK3CG/HDAC5/MIR27B/PLCB2/HDAC9/PRKG1/TNF/EGF/CISH/AGT/PLA2G2A
WP_MODULATORS_OF_TCR_SIGNALING_AND_T_CELL_ACTIVATION	WP_MODULATORS_OF_TCR_SIGNALING_AND_T_CELL_ACTIVATION	61	-0.406536	-1.39434	0.0252287	0.103796	0.0770701	8264	tags=43%, list=24%, signal=32%	ELOB/CD5/CD28/CBLB/PTPN6/CD3G/TRAF6/VAV1/CD3D/LCK/IKBKB/NDUFB10/LAT/NFKBIA/CD8A/MAP4K1/REL/ZAP70/LCP2/PIK3R1/CD3E/CD247/RHOH/GRAP2/SH2D1A/ITK
BIOCARTA_THELPER_PATHWAY	BIOCARTA_THELPER_PATHWAY	12	-0.665271	-1.56574	0.0254141	0.104244	0.0774031	6654	tags=83%, list=19%, signal=67%	CD28/CD3G/CD3D/ITGB2/CD3E/CD247/CD2/ITGAL/CD4/PTPRC
PID_ERBB_NETWORK_PATHWAY	PID_ERBB_NETWORK_PATHWAY	15	-0.618643	-1.53938	0.0254203	0.104244	0.0774031	4468	tags=47%, list=13%, signal=41%	NRG3/NRG2/NRG1/BTC/EGF/ERBB4/ERBB3
WP_PHOTODYNAMIC_THERAPYINDUCED_HIF1_SURVIVAL_SIGNALING	WP_PHOTODYNAMIC_THERAPYINDUCED_HIF1_SURVIVAL_SIGNALING	38	0.524917	1.55247	0.0257432	0.105397	0.078259	8525	tags=50%, list=25%, signal=38%	BIRC5/PTGS2/SLC2A3/BCL2A1/EPO/TGFB3/SLC2A1/SERPINE1/SLC16A1/LDHA/BAK1/BNIP3/ADAMTSL4-AS1/EGLN1/BAX/VEGFA/PFKL/ANGPT2/PGK1
WP_SELECTIVE_EXPRESSION_OF_CHEMOKINE_RECEPTORS_DURING_TCELL_POLARIZATION	WP_SELECTIVE_EXPRESSION_OF_CHEMOKINE_RECEPTORS_DURING_TCELL_POLARIZATION	29	-0.514234	-1.48191	0.0257885	0.105411	0.0782697	5524	tags=48%, list=16%, signal=41%	CCL4/IL12B/IL2/CCR1/IFNGR1/IL12A/CCR4/CXCR3/CD4/CSF2/CD40LG/CCR5/CCR2/CCR3
BIOCARTA_TH1TH2_PATHWAY	BIOCARTA_TH1TH2_PATHWAY	21	-0.584483	-1.55103	0.0258683	0.105512	0.0783444	5329	tags=57%, list=15%, signal=48%	IL12B/IL2/CD86/NR1I2/IFNGR1/IL12A/CD40/IL18/CD40LG/HLA-DRB1/HLA-DRA/HLA-DRB5
REACTOME_PLATELET_AGGREGATION_PLUG_FORMATION	REACTOME_PLATELET_AGGREGATION_PLUG_FORMATION	38	-0.485067	-1.50453	0.0259387	0.105512	0.0783444	2335	tags=18%, list=7%, signal=17%	RAPGEF4/FGB/APBB1IP/SYK/FGG/F2/FGA
REACTOME_RESPIRATORY_ELECTRON_TRANSPORT	REACTOME_RESPIRATORY_ELECTRON_TRANSPORT	93	-0.364398	-1.34415	0.0259241	0.105512	0.0783444	14062	tags=55%, list=41%, signal=33%	NDUFS8/TACO1/ACAD9/NDUFS3/COX5A/NDUFA8/COX11/SCO1/NDUFS4/NDUFV1/COX20/TIMMDC1/TMEM186/NDUFB7/NDUFB2/NDUFB11/SDHD/NDUFA9/SDHC/NDUFAF4/UQCRQ/NDUFC2/COX5B/COX6A1/COX4I1/NDUFS7/ETFB/NDUFA2/NDUFB4/COX6B1/NDUFS2/UQCRC1/UQCRB/NDUFA4/NDUFB8/NDUFAF1/NDUFB10/COX6C/NDUFA5/COX7C/COX18/COQ10A/SDHA/NDUFC1/UQCRC2/NDUFA3/ETFDH/NDUFAF3/COX7B/COX16/NDUFA1
REACTOME_TRANSCRIPTION_OF_THE_HIV_GENOME	REACTOME_TRANSCRIPTION_OF_THE_HIV_GENOME	70	0.436535	1.45596	0.0263174	0.10688	0.0793603	12887	tags=57%, list=37%, signal=36%	TAF7L/ELOA2/TAF5/POLR2D/NELFB/NCBP1/SUPT16H/TAF13/SSRP1/POLR2G/ELOA/TAF9/POLR2L/ERCC2/GTF2E2/RNGTT/TAF11/POLR2H/GTF2A2/TAF12/GTF2H2/GTF2H3/CCNT1/TAF2/POLR2F/TAF10/ERCC3/GTF2A1/ELOC/RNMT/NELFE/CCNK/ELL/GTF2E1/GTF2H4/POLR2B/SUPT5H/MNAT1/GTF2F1/CCNT2
REACTOME_REGULATION_OF_TP53_EXPRESSION_AND_DEGRADATION	REACTOME_REGULATION_OF_TP53_EXPRESSION_AND_DEGRADATION	37	0.520985	1.52646	0.0266772	0.108167	0.0803162	6241	tags=32%, list=18%, signal=27%	CDK1/CCNA2/CDKN2A/CDK2/CHEK2/RPS27A/CCNA1/PPP2R1A/PPP2R5C/DAXX/UBA52/PPP2R1B
REACTOME_ONCOGENE_INDUCED_SENESCENCE	REACTOME_ONCOGENE_INDUCED_SENESCENCE	33	0.526333	1.52599	0.0268288	0.108388	0.0804804	7078	tags=36%, list=21%, signal=29%	E2F2/CDKN2A/E2F1/RPS27A/CDKN2D/CDKN2C/TFDP1/AGO1/UBA52/E2F3/CDK4/AGO3
KEGG_PRIMARY_BILE_ACID_BIOSYNTHESIS	KEGG_PRIMARY_BILE_ACID_BIOSYNTHESIS	16	-0.613868	-1.5241	0.0268568	0.108388	0.0804804	4106	tags=50%, list=12%, signal=44%	HSD3B7/CYP27A1/CYP7A1/CYP8B1/CH25H/CYP7B1/ACOX2/AKR1D1
REACTOME_HSF1_DEPENDENT_TRANSACTIVATION	REACTOME_HSF1_DEPENDENT_TRANSACTIVATION	38	-0.481586	-1.49374	0.0269427	0.108388	0.0804804	2153	tags=21%, list=6%, signal=20%	CAMK2D/RLN1/HSPA2/HSPB8/HSPB1/CAMK2A/CRYAB/GML
REACTOME_GLYCOSAMINOGLYCAN_METABOLISM	REACTOME_GLYCOSAMINOGLYCAN_METABOLISM	124	0.390732	1.40707	0.0268895	0.108388	0.0804804	4077	tags=23%, list=12%, signal=20%	HAS1/ACAN/HMMR/HS6ST2/HS3ST5/NCAN/HPSE2/LUM/NDST4/DCN/HS3ST6/GPC2/LYVE1/HAS2/B4GALT2/HYAL3/CEMIP/SDC1/XYLT1/B3GNT4/HS3ST1/ST3GAL4/CSPG5/HAS3/ST3GAL3/GPC6/CSPG4/CHSY1
REACTOME_RESPONSE_TO_ELEVATED_PLATELET_CYTOSOLIC_CA2	REACTOME_RESPONSE_TO_ELEVATED_PLATELET_CYTOSOLIC_CA2	132	-0.351546	-1.37317	0.0269467	0.108388	0.0804804	4609	tags=24%, list=13%, signal=21%	CFD/IGF1/GAS6/F8/CD36/APOH/PROS1/SRGN/ECM1/LGALS3BP/PRKCA/CLU/SERPINA3/PHACTR2/A2M/TIMP1/HGF/FGB/SERPINA1/ORM2/CTSW/ALB/SELENOP/EGF/VEGFD/SELP/HRG/RARRES2/ORM1/SERPINA4/FGG/FGA
REACTOME_ADENYLATE_CYCLASE_ACTIVATING_PATHWAY	REACTOME_ADENYLATE_CYCLASE_ACTIVATING_PATHWAY	10	-0.682252	-1.52291	0.0270168	0.108497	0.0805612	4636	tags=60%, list=13%, signal=52%	ADCY6/GNAL/ADCY7/ADCY5/ADCY8/ADCY2
REACTOME_GAMMA_CARBOXYLATION_HYPUSINE_FORMATION_AND_ARYLSULFATASE_ACTIVATION	REACTOME_GAMMA_CARBOXYLATION_HYPUSINE_FORMATION_AND_ARYLSULFATASE_ACTIVATION	42	-0.454463	-1.44525	0.0271266	0.108765	0.0807602	4857	tags=26%, list=14%, signal=23%	F9/GAS6/F8/PROS1/SUMF1/F7/FN3K/F10/ARSD/ARSI/F2
REACTOME_ACETYLCHOLINE_BINDING_AND_DOWNSTREAM_EVENTS	REACTOME_ACETYLCHOLINE_BINDING_AND_DOWNSTREAM_EVENTS	14	0.655004	1.56822	0.0276596	0.110726	0.0822162	3671	tags=50%, list=11%, signal=45%	CHRNA7/CHRNA2/CHRNA5/CHRNA1/CHRNE/CHRNA4/CHRNB4
KEGG_PRIMARY_IMMUNODEFICIENCY	KEGG_PRIMARY_IMMUNODEFICIENCY	35	-0.48763	-1.48729	0.0277362	0.110857	0.0823133	6821	tags=60%, list=20%, signal=48%	TNFRSF13B/CD3D/LCK/IL7R/CD8A/CD79A/CD8B/ZAP70/BLNK/CD19/IL2RG/CD3E/JAK3/RAG1/CD40/CD4/CIITA/BTK/CD40LG/PTPRC/RAG2
REACTOME_SIGNALING_BY_NOTCH1_HD_DOMAIN_MUTANTS_IN_CANCER	REACTOME_SIGNALING_BY_NOTCH1_HD_DOMAIN_MUTANTS_IN_CANCER	15	0.65673	1.59604	0.0278435	0.11111	0.0825011	11100	tags=87%, list=32%, signal=59%	JAG1/RPS27A/DLL1/NEURL1B/UBA52/ADAM17/NOTCH1/NEURL1/ADAM10/MIB2/MIB1/JAG2/UBC
REACTOME_REGULATION_OF_TLR_BY_ENDOGENOUS_LIGAND	REACTOME_REGULATION_OF_TLR_BY_ENDOGENOUS_LIGAND	21	-0.577894	-1.53355	0.0281749	0.112255	0.0833512	4394	tags=52%, list=13%, signal=46%	TLR6/LBP/CD36/TLR1/TLR2/GSDME/FGB/LY96/CD14/FGG/FGA
REACTOME_PI3K_AKT_SIGNALING_IN_CANCER	REACTOME_PI3K_AKT_SIGNALING_IN_CANCER	105	-0.359269	-1.34494	0.0282547	0.112395	0.0834553	6748	tags=32%, list=20%, signal=26%	FGF1/KIT/VAV1/LCK/KITLG/PIK3CD/FGF4/PIK3CB/PDGFRA/SRC/GAB1/NRG3/IRS2/CD86/AKT3/CD19/KL/PIK3R1/NRG2/NRG1/FGF17/FGF3/FLT3/BTC/HGF/MET/NR4A1/EGF/PIK3AP1/FGFR3/TRAT1/ERBB4/KLB/ERBB3
REACTOME_EICOSANOID_LIGAND_BINDING_RECEPTORS	REACTOME_EICOSANOID_LIGAND_BINDING_RECEPTORS	15	-0.612803	-1.52485	0.0283347	0.112536	0.0835598	2394	tags=40%, list=7%, signal=37%	CYSLTR2/CYSLTR1/GPR17/OXER1/PTGER3/PTGDR
REACTOME_SYNTHESIS_OF_BILE_ACIDS_AND_BILE_SALTS_VIA_7ALPHA_HYDROXYCHOLESTEROL	REACTOME_SYNTHESIS_OF_BILE_ACIDS_AND_BILE_SALTS_VIA_7ALPHA_HYDROXYCHOLESTEROL	24	-0.575762	-1.60164	0.0284254	0.112541	0.083564	4106	tags=46%, list=12%, signal=40%	HSD3B7/CYP27A1/CYP7A1/AKR1C1/CYP8B1/AKR1C2/CYP7B1/AKR1C3/ACOX2/AKR1D1/SLC27A2
PID_TELOMERASE_PATHWAY	PID_TELOMERASE_PATHWAY	67	0.44659	1.48739	0.0284018	0.112541	0.083564	9592	tags=42%, list=28%, signal=30%	WT1/TERT/BLM/E2F1/IFNG/MXD1/MYC/RAD1/PARP2/SIN3B/RAD9A/HDAC2/FOS/MRE11/JUN/XRCC5/NCL/ACD/HDAC1/MTOR/XRCC6/PTGES3/RBBP4/HNRNPC/SAP30/SP3/WRN/ABL1
WP_GPCRS_CLASS_B_SECRETINLIKE	WP_GPCRS_CLASS_B_SECRETINLIKE	24	-0.574196	-1.59728	0.0290903	0.114993	0.0853847	3395	tags=25%, list=10%, signal=23%	VIPR2/ADGRE1/VIPR1/CALCR/SCTR/GCGR
REACTOME_SEMA3A_PLEXIN_REPULSION_SIGNALING_BY_INHIBITING_INTEGRIN_ADHESION	REACTOME_SEMA3A_PLEXIN_REPULSION_SIGNALING_BY_INHIBITING_INTEGRIN_ADHESION	14	0.650931	1.55847	0.0293027	0.115652	0.0858734	3630	tags=36%, list=11%, signal=32%	SEMA3A/PLXNA2/FARP2/PLXNA1/PLXNA4
REACTOME_CHYLOMICRON_REMODELING	REACTOME_CHYLOMICRON_REMODELING	10	0.706467	1.55893	0.0296096	0.116498	0.086502	1027	tags=40%, list=3%, signal=39%	APOA1/APOA2/APOB/LPL
BIOCARTA_FREE_PATHWAY	BIOCARTA_FREE_PATHWAY	10	0.705009	1.55571	0.0296096	0.116498	0.086502	255	tags=20%, list=1%, signal=20%	XDH/CXCL8
REACTOME_NEUROTRANSMITTER_RECEPTORS_AND_POSTSYNAPTIC_SIGNAL_TRANSMISSION	REACTOME_NEUROTRANSMITTER_RECEPTORS_AND_POSTSYNAPTIC_SIGNAL_TRANSMISSION	205	0.347662	1.33285	0.0299382	0.117608	0.0873259	3969	tags=20%, list=12%, signal=17%	KCNJ6/CHRNA7/GABRA4/GNG13/TUBA3C/GABRB1/CACNG2/GNAT3/GNB3/GABRQ/GRIN2D/CHRNA2/TUBB2B/LIN7A/NRGN/CHRNA5/TUBB6/ADCY1/KPNA2/CHRNA1/GRIK1/GRIN3B/GNG8/GRIN1/GABRG2/CHRNE/GLRA2/TUBB2A/PRKCG/ACTN2/TUBB3/GABRR2/GRIK3/TUBB4B/KCNJ16/CHRNA4/CHRNB4/AKAP5/CAMK4/NRAS
KEGG_SMALL_CELL_LUNG_CANCER	KEGG_SMALL_CELL_LUNG_CANCER	84	0.413264	1.40089	0.0300189	0.117742	0.0874252	2189	tags=17%, list=6%, signal=16%	LAMA1/E2F2/PTGS2/RXRG/LAMA4/CCNE2/COL4A2/E2F1/FN1/CKS1B/CCNE1/ITGA2B/COL4A1/CDK2
WP_PI3KAKT_SIGNALING_PATHWAY	WP_PI3KAKT_SIGNALING_PATHWAY	335	0.323983	1.2979	0.0301525	0.118082	0.0876777	3969	tags=17%, list=12%, signal=15%	COL2A1/EFNA2/LAMA1/FGF5/TNC/IBSP/CSF3/GNG13/GNB3/PCK1/COMP/BRCA1/IL6/COL6A3/LAMA4/NTRK2/CCNE2/COL4A2/ITGB3/CSH2/EFNA5/FGFR4/LPAR2/G6PC2/CREB5/VEGFC/FN1/CCNE1/PCK2/GNG8/LPAR4/IFNA5/ITGA2B/ITGA7/IFNB1/COL4A1/COL1A2/THBS4/CDK2/COL9A1/EIF4EBP1/DDIT4/RELN/PKN3/EPO/MYC/INS/COL6A2/COL1A1/FGF19/FGF10/PGF/LAMA2/LPAR1/FGF8/ITGB8/NRAS
BIOCARTA_TCYTOTOXIC_PATHWAY	BIOCARTA_TCYTOTOXIC_PATHWAY	12	-0.657361	-1.54712	0.0308485	0.12062	0.0895625	8089	tags=83%, list=23%, signal=64%	CD28/CD3G/CD3D/CD8A/ITGB2/CD3E/CD247/CD2/ITGAL/PTPRC
WP_SPLICING_FACTOR_NOVA_REGULATED_SYNAPTIC_PROTEINS	WP_SPLICING_FACTOR_NOVA_REGULATED_SYNAPTIC_PROTEINS	42	0.502629	1.50725	0.0310589	0.121255	0.0900339	2619	tags=19%, list=8%, signal=18%	KCNJ6/CADM3/CHL1/NTNG1/EFNA5/GRIN1/GABRG2/KCNMA1
WP_LNCRNA_IN_CANONICAL_WNT_SIGNALING_AND_COLORECTAL_CANCER	WP_LNCRNA_IN_CANONICAL_WNT_SIGNALING_AND_COLORECTAL_CANCER	95	0.397937	1.38789	0.0311812	0.121544	0.0902488	7440	tags=34%, list=22%, signal=26%	WNT10B/DKK1/EZH2/WNT5A/TFAP2A/WNT6/CER1/FZD8/WNT2/FOSL1/SFRP1/SERPINF1/TCF3/MYC/WNT11/WNT3/PLAU/DKK4/H19/WNT4/FZD2/CDK8/ATF3/WNT7A/WIF1/DKK2/MACROH2A2/CSNK1E/RUVBL1/PORCN/ROR1/JUN
BIOCARTA_DNAFRAGMENT_PATHWAY	BIOCARTA_DNAFRAGMENT_PATHWAY	10	0.702715	1.55065	0.0313343	0.121952	0.090552	6509	tags=50%, list=19%, signal=41%	TOP2A/HMGB2/GZMB/CASP7/CASP3
REACTOME_RETINOID_CYCLE_DISEASE_EVENTS	REACTOME_RETINOID_CYCLE_DISEASE_EVENTS	12	-0.654833	-1.54117	0.0314878	0.122361	0.0908553	76	tags=33%, list=0%, signal=33%	RLBP1/LRAT/RDH12/RBP4
REACTOME_APOPTOSIS	REACTOME_APOPTOSIS	179	0.355629	1.35496	0.0317325	0.123122	0.0914204	8076	tags=31%, list=23%, signal=24%	TP73/SFN/CLSPN/H1-5/LMNB1/H1-4/PSMA8/CDKN2A/E2F1/HMGB2/H1-2/PSME4/STK26/DCC/H1-3/VIM/RPS27A/TRAF2/CARD8/GSDMD/PRKCQ/GZMB/YWHAQ/PKP1/CASP7/BAK1/TFDP1/PSMB7/PSMB5/CASP9/KPNB1/PSMD14/PSMD1/YWHAH/UBA52/PSMB9/MAPT/CASP3/PSMA4/APAF1/DIABLO/BAX/H1-0/PSMA5/TNFRSF10A/PSMC1/BIRC2/OCLN/PSMC3/PSMD11/DAPK3/PSMA6/PSMB2/PSMA1/H1-1
WP_PTDINS45P2_IN_CYTOKINESIS_PATHWAY	WP_PTDINS45P2_IN_CYTOKINESIS_PATHWAY	12	0.698719	1.59544	0.031815	0.123237	0.0915058	487	tags=25%, list=1%, signal=25%	ANLN/KIF23/RACGAP1
PID_ATF2_PATHWAY	PID_ATF2_PATHWAY	59	0.451102	1.45834	0.0318599	0.123237	0.0915058	5706	tags=36%, list=17%, signal=30%	CXCL8/CCNA2/BRCA1/IL6/MAPK11/DUSP5/SOCS3/IFNG/DUSP8/INS/COL24A1/PLAU/JDP2/CBFB/RUVBL2/HES1/TGFB2/SERPINB5/ATF3/TH/GADD45A
WP_STEROL_REGULATORY_ELEMENTBINDING_PROTEINS_SREBP_SIGNALING	WP_STEROL_REGULATORY_ELEMENTBINDING_PROTEINS_SREBP_SIGNALING	71	0.425619	1.42596	0.0319942	0.123567	0.091751	4816	tags=30%, list=14%, signal=25%	LPL/FDPS/HMGCS1/MVD/ACSS1/SQLE/LDLR/IDI1/INSIG1/FDFT1/FASN/HMGCR/INS/ACLY/SCAP/SCD/SCARB1/CYP51A1/LSS/CDK8/MIR33A
REACTOME_PURINERGIC_SIGNALING_IN_LEISHMANIASIS_INFECTION	REACTOME_PURINERGIC_SIGNALING_IN_LEISHMANIASIS_INFECTION	26	-0.532996	-1.51336	0.0323702	0.12451	0.0924511	2210	tags=35%, list=6%, signal=32%	P2RX7/ENTPD1/IL1A/IL18/TXNIP/IL1B/NLRP3/CTSG/C3
PID_NOTCH_PATHWAY	PID_NOTCH_PATHWAY	59	0.449988	1.45474	0.0323865	0.12451	0.0924511	4211	tags=19%, list=12%, signal=16%	ADAM12/DNM1/MFAP2/GATA3/JAG1/MFAP5/MYC/SSPOP/ENO1/DLL1/SKP2
REACTOME_GLYCEROPHOSPHOLIPID_BIOSYNTHESIS	REACTOME_GLYCEROPHOSPHOLIPID_BIOSYNTHESIS	127	-0.345711	-1.34944	0.0322969	0.12451	0.0924511	5319	tags=23%, list=15%, signal=19%	PLAAT3/PLAAT1/PLA2R1/PLA2G12A/ACP6/CDS2/MBOAT7/LPCAT2/CDS1/PLAAT4/PLA2G4F/PLA2G4C/ACHE/PLA2G2F/PLA2G4E/STARD10/ETNK2/PCYT1B/PLA2G3/CHAT/CPNE6/GPD1/PLA2G2D/PHOSPHO1/GPAT3/ETNPPL/PLD4/PLAAT5/PLA2G2A
REACTOME_SCAVENGING_BY_CLASS_A_RECEPTORS	REACTOME_SCAVENGING_BY_CLASS_A_RECEPTORS	19	0.601165	1.55158	0.0326356	0.125277	0.0930206	3246	tags=47%, list=9%, signal=43%	APOA1/COL3A1/APOB/COL4A2/SCARA5/SCGB3A2/COL4A1/COL1A2/COL1A1
WP_NEURAL_CREST_DIFFERENTIATION	WP_NEURAL_CREST_DIFFERENTIATION	101	0.397294	1.40389	0.0328072	0.125744	0.0933674	4078	tags=22%, list=12%, signal=19%	ISL1/COL2A1/DMBX1/LHX1/GBX2/BMP7/LHX2/TLX2/ZIC5/ZIC1/TFAP2A/FOXD3/HEY2/LHX5/NEUROG1/DLX5/MYC/FGF19/COL11A2/DLL1/FGF8/OLIG2
REACTOME_DAP12_INTERACTIONS	REACTOME_DAP12_INTERACTIONS	40	-0.471166	-1.47638	0.0330064	0.126226	0.0937252	6440	tags=48%, list=19%, signal=39%	VAV3/LCK/CD300LB/HLA-C/B2M/LAT/PIK3CB/CD300E/HLA-E/HLA-B/TYROBP/CLEC5A/KLRD1/LCP2/PIK3R1/TREM2/BTK/GRAP2/SYK
WP_EBOLA_VIRUS_INFECTION_IN_HOST	WP_EBOLA_VIRUS_INFECTION_IN_HOST	129	-0.334516	-1.30531	0.033033	0.126226	0.0937252	6949	tags=26%, list=20%, signal=21%	VPS11/CTSB/RAB7A/HLA-G/ITGA2/HLA-C/HLA-F/RAB9A/PIK3CD/PIK3CB/VPS18/DAB2IP/GAS6/REL/HAVCR2/CLEC6A/HLA-E/HLA-B/PIK3R1/HLA-A/CAV2/MERTK/HLA-DMA/HLA-DRB1/HLA-DQB2/HLA-DQB1/HLA-DPB1/HLA-DQA1/HLA-DRA/HLA-DPA1/HLA-DQA2/HLA-DOA/HLA-DRB5/CLEC10A
PID_FRA_PATHWAY	PID_FRA_PATHWAY	37	0.512215	1.50077	0.033141	0.126447	0.0938893	3676	tags=32%, list=11%, signal=29%	MMP1/CXCL8/CCNA2/MMP9/IL6/CDKN2A/LIF/DCN/FOSL1/COL1A2/TXLNG/PLAU
REACTOME_IL_6_TYPE_CYTOKINE_RECEPTOR_LIGAND_INTERACTIONS	REACTOME_IL_6_TYPE_CYTOKINE_RECEPTOR_LIGAND_INTERACTIONS	17	0.64242	1.61596	0.0331935	0.126456	0.093896	4193	tags=47%, list=12%, signal=41%	IL31RA/IL11/LIF/CNTFR/IL11RA/CRLF1/OSM/IL31
REACTOME_METABOLISM_OF_NUCLEOTIDES	REACTOME_METABOLISM_OF_NUCLEOTIDES	97	0.393539	1.37952	0.0332773	0.126584	0.0939912	8886	tags=36%, list=26%, signal=27%	XDH/RRM2/TK1/TYMS/ENTPD8/DTYMK/NT5E/ENTPD2/IMPDH1/RRM1/CAD/UCK2/NUDT1/NT5M/ADSL/GART/PNP/NT5C/CMPK1/AK4/GMPS/NME4/ENTPD7/ADSS1/DUT/PPAT/NUDT5/UMPS/AK2/AK7/AK8/NUDT15/ENTPD4/DGUOK/GUK1
REACTOME_PHOSPHOLIPID_METABOLISM	REACTOME_PHOSPHOLIPID_METABOLISM	210	-0.307336	-1.27032	0.0334332	0.126986	0.0942894	5615	tags=21%, list=16%, signal=18%	PLAAT2/PIK3C2G/PIP4K2A/PIK3CB/INPP5K/PLAAT3/PLAAT1/GDPD3/PLA2R1/PLA2G12A/ACP6/CDS2/MBOAT7/TNFAIP8L3/PIK3C2B/LPCAT2/CDS1/MTM1/PLAAT4/PLA2G4F/PLA2G4C/ACHE/PIK3R1/PLA2G2F/TNFAIP8L2/PIK3CG/PLA2G4E/PIK3R5/INPP5D/STARD10/ETNK2/PCYT1B/PLA2G3/CHAT/INPP4B/CPNE6/PLEKHA6/GPD1/PLA2G2D/PHOSPHO1/GPAT3/ETNPPL/PLD4/PLAAT5/PLA2G2A
PID_INTEGRIN1_PATHWAY	PID_INTEGRIN1_PATHWAY	66	0.445516	1.48123	0.0334969	0.127037	0.094327	5447	tags=38%, list=16%, signal=32%	COL2A1/LAMA1/TNC/COL11A1/COL5A1/COL3A1/COL5A2/COL6A3/LAMA4/FN1/COL7A1/ITGA7/COL4A1/COL1A2/COL6A2/COL1A1/COL11A2/LAMA2/PLAU/CSPG4/THBS2/VCAM1/NID1/FBN1/LAMC1
REACTOME_DISORDERS_OF_TRANSMEMBRANE_TRANSPORTERS	REACTOME_DISORDERS_OF_TRANSMEMBRANE_TRANSPORTERS	177	0.345105	1.31164	0.0338279	0.127931	0.0949914	8037	tags=32%, list=23%, signal=25%	SLCO1B1/SLC4A1/APOA1/SLC6A5/SLC5A1/ABCB11/SLC5A7/RHAG/PSMA8/SLC1A1/AVPR1B/SLC2A2/PSME4/DERL3/SLC2A1/NUP188/ABCC2/RPS27A/SLC16A1/NDC1/ABCB6/SLC7A9/SLC17A8/SLC7A7/SLC34A3/ABCG5/NUP107/SLC1A3/SLC34A1/NUP62/NUP85/SLC6A18/PSMB7/SLC5A2/NUP155/PSMB5/PSMD14/PSMD1/UBA52/SLC34A2/PSMB9/SLC35C1/PSMA4/CP/PSMA5/SLC36A2/PSMC1/OS9/PSMC3/PSMD11/SLC27A4/ABCD4/NUP35/PSMA6/NUP160/PSMB2/PSMA1
WP_VITAMIN_D_RECEPTOR_PATHWAY	WP_VITAMIN_D_RECEPTOR_PATHWAY	181	-0.311391	-1.26941	0.0338343	0.127931	0.0949914	3740	tags=25%, list=11%, signal=22%	KRT38/G6PD/IRF8/RASGRP1/NOX1/TNFRSF11B/SLC8A1/SATB1/CTLA4/NINJ1/KL/TNFSF11/ALOX5/CYP2S1/IL12A/COLEC11/CD40/TRPV6/CEBPA/IRF5/CYP7A1/IGSF9B/DNER/ITGAM/ORM2/SULT1C2/BMP6/IRF4/CYP3A5/ADRB2/HLA-DRB1/CD14/SLC2A4/CLDN2/HLA-DQA1/KRT13/SLC37A2/CAMP/HLA-DQA2/G0S2/ORM1/HNF1A/CST6/LRRC25/CYP3A4
BIOCARTA_CTL_PATHWAY	BIOCARTA_CTL_PATHWAY	13	-0.631534	-1.52207	0.0339494	0.128174	0.0951718	6654	tags=69%, list=19%, signal=56%	CD3G/CD3D/B2M/FASLG/ITGB2/HLA-A/CD3E/CD247/ITGAL
REACTOME_AGGREPHAGY	REACTOME_AGGREPHAGY	44	0.487418	1.4811	0.0341697	0.128388	0.0953306	6623	tags=34%, list=19%, signal=28%	TUBA3C/TUBB2B/TUBB6/TUBB2A/TUBB3/TUBB4B/VIM/RPS27A/TUBA1B/TUBB1/TUBA1C/TUBA8/UBA52/TUBA3D/PCNT
REACTOME_SIGNALING_BY_MODERATE_KINASE_ACTIVITY_BRAF_MUTANTS	REACTOME_SIGNALING_BY_MODERATE_KINASE_ACTIVITY_BRAF_MUTANTS	44	-0.44822	-1.44081	0.0342606	0.128388	0.0953306	1922	tags=14%, list=6%, signal=13%	FGB/APBB1IP/CAMK2A/CNKSR2/FGG/FGA
REACTOME_STABILIZATION_OF_P53	REACTOME_STABILIZATION_OF_P53	57	0.442452	1.41563	0.0342187	0.128388	0.0953306	12282	tags=61%, list=36%, signal=40%	PSMA8/CDKN2A/PSME4/CHEK2/RPS27A/PSMB7/PSMB5/PSMD14/PSMD1/UBA52/PSMB9/PSMA4/PSMA5/PSMC1/PSMC3/PSMD11/PSMA6/PSMB2/PSMA1/PSMC6/PSMD2/PSMD13/PSMA3/PSMB4/PSMD4/PSME1/COP1/PSMC4/UBC/PSME2/PSMA2/PSMD5/PSMD8/PSMA7/MDM2
WP_BREAST_CANCER_PATHWAY	WP_BREAST_CANCER_PATHWAY	154	0.362898	1.34982	0.0342306	0.128388	0.0953306	7546	tags=29%, list=22%, signal=22%	FGF5/E2F2/RAD51/WNT10B/BRCA2/FGF16/WNT5A/BRCA1/WNT6/E2F1/FZD8/WNT2/HEY2/PGR/MYC/WNT11/SHC4/FGF19/FGF10/WNT3/DLL1/FGF8/NRAS/WNT4/FZD2/HES1/FGF23/FGFR1/BAK1/HES5/WNT7A/GADD45A/NOTCH3/RPS6KB2/E2F3/HRAS/CDK4/BAX/FOS/MRE11/FGF2/JUN/HEYL/HEY1
REACTOME_POTENTIAL_THERAPEUTICS_FOR_SARS	REACTOME_POTENTIAL_THERAPEUTICS_FOR_SARS	154	-0.32826	-1.30191	0.0342284	0.128388	0.0953306	5487	tags=25%, list=16%, signal=21%	IL1R1/NR3C1/IGLV6-57/CRBN/CD79A/ATP1A1/IGHV3-13/IGLV1-40/IGKV2-28/IGHV4-34/BLNK/IL6R/FXYD2/IGKV1D-33/FXYD6/IFNGR1/JAK3/ATP1B1/ATP1B2/IGHV4-59/PDCD1/FXYD1/BTK/CYSLTR1/TLR7/SYK/FXYD4/FXYD7/IGKV1-16/IGHM/IGKV1-39/IGHV1-46/IGKV1D-12/IGLV3-27/IGKV1-17/ATP1A4/IGLV7-43/IGHD
REACTOME_TRANSCRIPTIONAL_REGULATION_BY_THE_AP_2_TFAP2_FAMILY_OF_TRANSCRIPTION_FACTORS	REACTOME_TRANSCRIPTIONAL_REGULATION_BY_THE_AP_2_TFAP2_FAMILY_OF_TRANSCRIPTION_FACTORS	38	0.510082	1.50859	0.0344037	0.128733	0.0955867	3417	tags=29%, list=10%, signal=26%	MYBL2/PITX2/CGA/ATAD2/TFAP2A/CGB3/HSPD1/TFAP2C/KCTD15/MYC/DEK
REACTOME_REGULATION_OF_RUNX3_EXPRESSION_AND_ACTIVITY	REACTOME_REGULATION_OF_RUNX3_EXPRESSION_AND_ACTIVITY	55	0.4491	1.42944	0.0345717	0.129035	0.0958109	12282	tags=60%, list=36%, signal=39%	CDKN2A/RPS27A/CBFB/PSMB7/PSMB5/PSMD14/PSMD1/UBA52/PSMB9/PSMA4/PSMA5/PSMC1/PSMC3/PSMD11/PSMA6/PSMB2/PSMA1/PSMC6/PSMD2/PSMD13/PSMA3/PSMB4/PSMD4/PSME1/PSMC4/UBC/PSME2/SMURF2/PSMA2/PSMD5/PSMD8/PSMA7/MDM2
WP_OSTEOBLAST_DIFFERENTIATION_AND_RELATED_DISEASES	WP_OSTEOBLAST_DIFFERENTIATION_AND_RELATED_DISEASES	118	0.37981	1.3587	0.0345867	0.129035	0.0958109	4948	tags=25%, list=14%, signal=22%	FGF5/WNT10B/WNT5A/GLI2/HES6/WNT6/FGFR4/MAPK12/WNT8B/MAPK11/FZD8/JAG1/WNT2/HEY2/PRKCG/HES2/RUNX2/WNT11/FGF10/WNT3/MAPK6/DLL1/FGF8/WNT4/FZD4/PRKCQ/FZD2/GLI3/STAT1/FGFR1
WP_FOCAL_ADHESION_PI3KAKTMTORSIGNALING_PATHWAY	WP_FOCAL_ADHESION_PI3KAKTMTORSIGNALING_PATHWAY	300	0.321639	1.27774	0.0346953	0.129249	0.0959696	3969	tags=18%, list=12%, signal=16%	COL2A1/EFNA2/LAMA1/TNC/IBSP/CSF3/GNG13/COL11A1/GNB3/COL5A3/COMP/FGF16/COL5A1/COL3A1/COL5A2/FOXA1/LAMA4/COL4A2/ITGB3/EFNA5/FGFR4/LPAR2/CREB5/SLC2A3/VEGFC/FN1/GNG8/LPAR4/ITGA2B/ITGA7/IFNB1/COL4A1/IRS4/COL1A2/THBS4/SLC2A2/EIF4EBP1/DDIT4/RELN/EPO/SLC2A1/INS/COL6A2/COL1A1/FGF19/FGF10/PGF/COL11A2/LAMA2/LPAR1/FGF8/ITGB8/NRAS
REACTOME_THE_CITRIC_ACID_TCA_CYCLE_AND_RESPIRATORY_ELECTRON_TRANSPORT	REACTOME_THE_CITRIC_ACID_TCA_CYCLE_AND_RESPIRATORY_ELECTRON_TRANSPORT	166	-0.317849	-1.2841	0.0348492	0.129631	0.0962533	9115	tags=41%, list=26%, signal=30%	NDUFB2/ATP5PD/NDUFB11/ATP5MF/SDHD/ATP5F1D/NDUFA9/PDK4/SDHC/NDUFAF4/UCP2/ATP5F1A/LDHB/UQCRQ/PDK3/NDUFC2/COX5B/ATP5MC1/ATP5PO/COX6A1/DMAC2L/SLC25A14/COX4I1/NDUFS7/ETFB/NDUFA2/NDUFB4/PDHA2/COX6B1/NDUFS2/UQCRC1/UQCRB/ATP5ME/NDUFA4/SUCLG1/NDUFB8/SLC16A3/NDUFAF1/NNT/ACO2/UCP1/IDH3G/NDUFB10/COX6C/NDUFA5/MPC1/COX7C/COX18/COQ10A/SDHA/SUCLG2/NDUFC1/OGDH/UQCRC2/NDUFA3/ETFDH/PDHA1/HAGH/BSG/NDUFAF3/PDP1/IDH2/…
WP_TCELL_RECEPTOR_SIGNALING_PATHWAY	WP_TCELL_RECEPTOR_SIGNALING_PATHWAY	90	-0.369789	-1.36046	0.0349604	0.129853	0.0964183	6739	tags=34%, list=20%, signal=28%	PRKCD/MAPK9/CD3G/TRAF6/OPRM1/VAV1/CD3D/VAV3/LCK/NFATC2/IKBKB/LAT/NFKBIA/CD8A/MAP4K1/REL/IL1A/ZAP70/LCP2/PIK3R1/WAS/CD3E/CD247/CD4/GRAP2/IRF4/ITK/IL1B/FYB1/CCR5/SKAP1
REACTOME_YAP1_AND_WWTR1_TAZ_STIMULATED_GENE_EXPRESSION	REACTOME_YAP1_AND_WWTR1_TAZ_STIMULATED_GENE_EXPRESSION	15	0.641559	1.55917	0.0353593	0.130567	0.0969486	2863	tags=33%, list=8%, signal=31%	TBX5/TEAD4/NPPA/GATA4/RUNX2
KEGG_BASE_EXCISION_REPAIR	KEGG_BASE_EXCISION_REPAIR	35	0.509454	1.49073	0.0353598	0.130567	0.0969486	4960	tags=31%, list=14%, signal=27%	NEIL3/POLE2/FEN1/POLD1/LIG1/POLD3/PCNA/POLE/POLE4/PARP2/POLE3
KEGG_PROTEASOME	KEGG_PROTEASOME	46	0.470028	1.43876	0.0352964	0.130567	0.0969486	10884	tags=59%, list=32%, signal=40%	PSMA8/PSME4/IFNG/PSMC1P4/PSMB7/PSMB5/PSMA6P4/PSMD14/PSMD1/PSMB9/PSMA4/PSMA5/PSMC1/PSMC3/PSMD11/PSMA6/PSMB2/PSMA1/PSMC6/PSMD2/PSMD13/PSMA3/PSMB4/PSMD4/PSME1/PSMC4/POMP
REACTOME_GAP_JUNCTION_TRAFFICKING_AND_REGULATION	REACTOME_GAP_JUNCTION_TRAFFICKING_AND_REGULATION	51	0.457964	1.43206	0.0353598	0.130567	0.0969486	5673	tags=37%, list=16%, signal=31%	TUBA3C/TUBB2B/DNM1/GJD4/TUBB6/GJC1/TUBB2A/GJB5/TUBB3/TUBB4B/GJB2/GJB7/GJA3/GJC2/TUBA1B/TUBB1/CLTB/TUBA1C/TUBA8
WP_GPCRS_CLASS_C_METABOTROPIC_GLUTAMATE_PHEROMONE	WP_GPCRS_CLASS_C_METABOTROPIC_GLUTAMATE_PHEROMONE	15	-0.601427	-1.49654	0.0354716	0.130788	0.0971128	4539	tags=47%, list=13%, signal=41%	GPRC5B/GPRC5C/GABBR2/GPRC5A/GRM8/GRM5/CASR
KEGG_VASCULAR_SMOOTH_MUSCLE_CONTRACTION	KEGG_VASCULAR_SMOOTH_MUSCLE_CONTRACTION	115	-0.35627	-1.36388	0.0362621	0.133508	0.0991323	7413	tags=35%, list=22%, signal=27%	MAPK3/RAMP3/ARAF/PTGIR/PRKCD/PRKCH/PLCB1/ITPR2/KCNMB2/ADRA1D/PLA2G4B/GNAS/AGTR1/PLA2G12A/MYL9/RAMP1/ADCY6/MYH11/NPR2/KCNMB1/MYLK/ADCY7/PRKCA/PLA2G2F/PLA2G4E/GUCY1A2/CYP4A11/PLCB2/PRKG1/PRKACG/PLA2G3/PLA2G2C/ADCY5/PLA2G2D/CYP4A22/CALML5/CACNA1F/ADCY8/PLA2G2A/ADCY2
REACTOME_TGF_BETA_RECEPTOR_SIGNALING_ACTIVATES_SMADS	REACTOME_TGF_BETA_RECEPTOR_SIGNALING_ACTIVATES_SMADS	46	0.46421	1.42095	0.0363742	0.133537	0.0991535	8019	tags=41%, list=23%, signal=32%	ITGB3/LTBP2/PMEPA1/LTBP1/TGFBR1/TGFB3/RPS27A/ITGB8/TGFB2/PPP1CA/FBN1/NEDD8/UBA52/XPO1/PPP1CC/USP15/UCHL5/NEDD4L/FKBP1A
KEGG_PHOSPHATIDYLINOSITOL_SIGNALING_SYSTEM	KEGG_PHOSPHATIDYLINOSITOL_SIGNALING_SYSTEM	76	-0.378893	-1.35231	0.0363758	0.133537	0.0991535	6627	tags=38%, list=19%, signal=31%	INPP1/ITPKA/PLCB3/OCRL/DGKE/PLCB1/ITPR2/PIK3CD/PIP5K1B/PIK3C2G/PIP4K2A/PIK3CB/INPP5K/DGKG/CDS2/PIK3C2B/IMPA2/CDS1/PIK3R1/PRKCA/PIK3CG/PLCZ1/PLCD1/PLCE1/PIK3R5/INPP5D/PLCB2/INPP4B/CALML5
REACTOME_PKA_MEDIATED_PHOSPHORYLATION_OF_CREB	REACTOME_PKA_MEDIATED_PHOSPHORYLATION_OF_CREB	20	-0.59383	-1.56724	0.0366147	0.133636	0.0992271	4636	tags=30%, list=13%, signal=26%	ADCY6/ADCY7/PRKACG/ADCY5/ADCY8/ADCY2
REACTOME_N_GLYCAN_ANTENNAE_ELONGATION_IN_THE_MEDIAL_TRANS_GOLGI	REACTOME_N_GLYCAN_ANTENNAE_ELONGATION_IN_THE_MEDIAL_TRANS_GOLGI	26	0.566515	1.54926	0.036505	0.133636	0.0992271	6092	tags=46%, list=18%, signal=38%	LHB/MGAT4C/CGA/ST8SIA3/ST8SIA2/B4GALT2/ST3GAL4/FUT3/MGAT5/CHST10/MGAT2/B4GALT1
WP_CELL_DIFFERENTIATION_EXPANDED_INDEX	WP_CELL_DIFFERENTIATION_EXPANDED_INDEX	38	0.505033	1.49366	0.0365708	0.133636	0.0992271	2863	tags=24%, list=8%, signal=22%	TLX2/LEFTY2/EZH2/SOX2/TLX3/LEFTY1/MIR221/BORCS8-MEF2B/RUNX2
WP_MBDNF_AND_PROBDNF_REGULATION_OF_GABA_NEUROTRANSMISSION	WP_MBDNF_AND_PROBDNF_REGULATION_OF_GABA_NEUROTRANSMISSION	38	0.504636	1.49249	0.0365708	0.133636	0.0992271	1669	tags=16%, list=5%, signal=15%	GABRA4/GABRG1/GABRB1/GABRQ/NTRK2/GABRG2
REACTOME_GRB2_EVENTS_IN_ERBB2_SIGNALING	REACTOME_GRB2_EVENTS_IN_ERBB2_SIGNALING	16	-0.600447	-1.49078	0.0367589	0.133968	0.0994738	4468	tags=38%, list=13%, signal=33%	NRG3/NRG2/NRG1/BTC/EGF/ERBB4
WP_IL18_SIGNALING_PATHWAY	WP_IL18_SIGNALING_PATHWAY	273	0.323372	1.27251	0.0370899	0.134979	0.100225	3713	tags=15%, list=11%, signal=14%	CCNB2/MMP13/CCL20/MMP1/NSMF/CXCL8/CCNA2/CCL18/MMP9/IL37/MYH6/PTGS2/MMP14/CSN2/PTX3/COL3A1/CXCL3/STMN1/IL6/MMP8/CD83/ACOD1/FN1/LMNB2/NRN1/ITGA2B/CLDN4/COL1A2/NPPA/HCAR2/CCN4/IL18R1/SOCS3/RUNX2/IFNG/TNFAIP3/COL1A1/ENO1/DEK/ADAMTS5/NR1H3/FUT1
PID_AP1_PATHWAY	PID_AP1_PATHWAY	70	0.427462	1.4257	0.0372609	0.135406	0.100542	5610	tags=27%, list=16%, signal=23%	MMP1/CDK1/CXCL8/MMP9/IL6/CDKN2A/FABP4/FOSL1/COL1A2/NPPA/IFNG/MYC/PLAU/CBFB/DMP1/FOSB/MT2A/ATF3/TH
REACTOME_SMAD2_SMAD3_SMAD4_HETEROTRIMER_REGULATES_TRANSCRIPTION	REACTOME_SMAD2_SMAD3_SMAD4_HETEROTRIMER_REGULATES_TRANSCRIPTION	36	0.511294	1.50201	0.0375192	0.136149	0.101093	11282	tags=56%, list=33%, signal=37%	COL1A2/RBL1/MYC/YBX1/SERPINE1/RPS27A/CDK8/TGIF2/TFDP1/UBA52/CCNC/TGIF1/HDAC1/WWTR1/CCNT1/SMAD2/MAPK1/UBC/MEN1/SMAD3
REACTOME_SIGNALING_BY_MET	REACTOME_SIGNALING_BY_MET	79	0.420985	1.4212	0.0379688	0.137582	0.102158	3969	tags=22%, list=12%, signal=19%	COL2A1/LAMA1/COL11A1/COL5A3/HGFAC/COL5A1/COL3A1/COL5A2/LAMA4/FN1/COL1A2/COL1A1/RPS27A/COL24A1/COL11A2/LAMA2/NRAS
REACTOME_REGULATION_OF_GLUCOKINASE_BY_GLUCOKINASE_REGULATORY_PROTEIN	REACTOME_REGULATION_OF_GLUCOKINASE_BY_GLUCOKINASE_REGULATORY_PROTEIN	32	0.524055	1.50143	0.0381875	0.138176	0.102598	10443	tags=62%, list=30%, signal=44%	NUP188/NDC1/NUP107/NUP62/NUP85/NUP155/NUP35/NUP160/NUP58/NUP93/NUP210/RAE1/NUP205/NUP214/NUP98/TPR/NUP50/NUP153/NUP37/GCK
WP_IL1_AND_MEGAKARYOCYTES_IN_OBESITY	WP_IL1_AND_MEGAKARYOCYTES_IN_OBESITY	24	-0.559126	-1.55536	0.038422	0.138286	0.10268	2620	tags=46%, list=8%, signal=42%	IL1R1/FCER1A/TLR1/TLR2/IL18/TIMP1/IL1B/CCR3/NLRP3/CCL2/F2
REACTOME_METABOLIC_DISORDERS_OF_BIOLOGICAL_OXIDATION_ENZYMES	REACTOME_METABOLIC_DISORDERS_OF_BIOLOGICAL_OXIDATION_ENZYMES	34	-0.476393	-1.43671	0.0384372	0.138286	0.10268	4718	tags=35%, list=14%, signal=30%	CYP26C1/MAT1A/CYP27A1/TBXAS1/CYP11B1/CYP2U1/CYP4F22/MAOA/CYP7B1/FMO3/UGT1A1/CYP11B2
REACTOME_NEGATIVE_REGULATION_OF_THE_PI3K_AKT_NETWORK	REACTOME_NEGATIVE_REGULATION_OF_THE_PI3K_AKT_NETWORK	113	-0.340279	-1.29864	0.0383343	0.138286	0.10268	6748	tags=34%, list=20%, signal=27%	FGF1/KIT/TRAF6/VAV1/LCK/KITLG/PIK3CD/PIP5K1B/FGF4/PIP4K2A/PIK3CB/PDGFRA/SRC/IER3/GAB1/NRG3/IRS2/CD86/AKT3/IL33/CD19/KL/PIK3R1/NRG2/NRG1/FGF17/FGF3/FLT3/BTC/HGF/MET/EGF/PIK3AP1/FGFR3/TRAT1/ERBB4/KLB/ERBB3
REACTOME_TRANSMISSION_ACROSS_CHEMICAL_SYNAPSES	REACTOME_TRANSMISSION_ACROSS_CHEMICAL_SYNAPSES	269	0.324742	1.27875	0.0382979	0.138286	0.10268	5839	tags=26%, list=17%, signal=22%	KCNJ6/CHRNA7/CACNA1E/SLC22A2/GABRA4/GNG13/SYT1/TUBA3C/GABRB1/CACNG2/GNAT3/GNB3/GABRQ/GRIN2D/SLC5A7/CHRNA2/TUBB2B/LIN7A/NRGN/CHRNA5/SLC32A1/TUBB6/ADCY1/KPNA2/CHRNA1/GRIK1/GRIN3B/SLC1A1/GNG8/GRIN1/GABRG2/CHRNE/GLRA2/TUBB2A/PRKCG/PPFIA4/ACTN2/TUBB3/BCHE/GABRR2/GRIK3/CACNA1B/TUBB4B/KCNJ16/CHRNA4/CHRNB4/AKAP5/CAMK4/NRAS/SLC22A1/TUBA1B/SLC1A2/SLC1A3/STXBP1/GRIN3A/CACNB1/TUBB1/RIMS1/HTR3D/PPFIA3/CACNA2D…
REACTOME_ACYL_CHAIN_REMODELLING_OF_PI	REACTOME_ACYL_CHAIN_REMODELLING_OF_PI	17	-0.595077	-1.50662	0.0386421	0.138825	0.10308	5319	tags=59%, list=15%, signal=50%	PLAAT3/PLA2R1/PLA2G12A/MBOAT7/PLA2G4F/PLA2G4C/PLA2G2F/PLA2G4E/PLA2G2D/PLA2G2A
REACTOME_SEALING_OF_THE_NUCLEAR_ENVELOPE_NE_BY_ESCRT_III	REACTOME_SEALING_OF_THE_NUCLEAR_ENVELOPE_NE_BY_ESCRT_III	32	0.522898	1.49812	0.0387215	0.138913	0.103145	7732	tags=41%, list=22%, signal=32%	TUBA3C/TUBB2B/TUBB6/TUBB2A/TUBB3/TUBB4B/TUBA1B/TUBB1/TUBA1C/TUBA8/TUBA3D/CHMP4A/TUBB8
WP_DNA_DAMAGE_RESPONSE_ONLY_ATM_DEPENDENT	WP_DNA_DAMAGE_RESPONSE_ONLY_ATM_DEPENDENT	109	0.383498	1.36414	0.0388826	0.139293	0.103427	3979	tags=17%, list=12%, signal=15%	TP73/BIK/WNT10B/RAC3/WNT5A/WNT6/CDKN2A/PCK2/LDLR/WNT2/FOSL1/MYC/WNT11/PDK1/WNT3/PLAU/NRAS/WNT4
KEGG_AXON_GUIDANCE	KEGG_AXON_GUIDANCE	129	0.363047	1.31553	0.0399537	0.142724	0.105975	3584	tags=19%, list=10%, signal=17%	EFNA2/PPP3R2/RAC3/EPHA5/EFNB3/NGEF/ROBO2/NTNG1/EFNA5/EPHA7/EPHA3/EPHB3/SEMA3A/PLXNA2/SEMA3D/SEMA7A/EPHA6/SEMA4G/EFNB1/L1CAM/EPHA4/NTN1/DCC/SEMA6B/PLXNA1
REACTOME_STIMULI_SENSING_CHANNELS	REACTOME_STIMULI_SENSING_CHANNELS	106	-0.344767	-1.29637	0.0399358	0.142724	0.105975	5719	tags=37%, list=17%, signal=31%	RIPK3/TPCN1/ASPH/TSC22D3/CLCN7/ASIC2/CLCNKA/SLC9C2/TRPV5/SLC9B1/ANO10/ANO4/CLCNKB/ANO3/TRPM2/SLC9B2/CLCN3/ANO5/CLCN5/MCOLN1/CASQ2/SGK2/TRPV6/ANO9/CLCA2/CLCN4/SLC9C1/WNK2/SLC17A3/NALCN/CASQ1/CLIC2/MCOLN3/TRPC3/ASIC5/MCOLN2/TRDN/SCNN1A/TRPA1
REACTOME_HEDGEHOG_ON_STATE	REACTOME_HEDGEHOG_ON_STATE	86	0.414521	1.41679	0.0401745	0.14331	0.10641	9005	tags=40%, list=26%, signal=29%	GLI2/PSMA8/GLI1/KIF7/DHH/PSME4/PTCH2/GPR161/RPS27A/GLI3/PSMB7/EVC2/PSMB5/PSMD14/PSMD1/HHIP/UBA52/PSMB9/ULK3/PSMA4/DZIP1/GRK2/PSMA5/PSMC1/PSMC3/PSMD11/PSMA6/PSMB2/PSMA1/CDC73/PSMC6/PTCH1/PSMD2/RBX1
KEGG_ERBB_SIGNALING_PATHWAY	KEGG_ERBB_SIGNALING_PATHWAY	87	-0.37871	-1.38469	0.0404329	0.144028	0.106943	6054	tags=28%, list=18%, signal=23%	PIK3CD/SHC2/PIK3CB/SRC/GAB1/PAK5/NRG3/AKT3/CAMK2D/PIK3R1/NRG2/PRKCA/PAK3/NRG1/PIK3CG/STAT5B/PIK3R5/MAPK10/STAT5A/BTC/CAMK2A/EGF/ERBB4/ERBB3
PID_FCER1_PATHWAY	PID_FCER1_PATHWAY	60	-0.411665	-1.40576	0.0405471	0.144231	0.107094	6544	tags=25%, list=19%, signal=20%	VAV1/NFATC2/IKBKB/FCER1G/LAT/FCER1A/HCLS1/LAT2/LCP2/PIK3R1/FCGR2B/BTK/SYK/ITK/MS4A2
WP_WNT_SIGNALING_PATHWAY_AND_PLURIPOTENCY	WP_WNT_SIGNALING_PATHWAY_AND_PLURIPOTENCY	101	0.383139	1.35387	0.0408163	0.144984	0.107653	4829	tags=23%, list=14%, signal=20%	WNT10B/RACGAP1/MMP7/WNT5A/SOX2/WNT6/LDLR/FOXD3/FZD8/WNT2/FOSL1/PRKCG/MYC/WNT11/POU5F1/WNT3/PLAU/WNT4/FZD4/PRKCQ/FZD2/PPP2R1A/ESRRB
KEGG_BLADDER_CANCER	KEGG_BLADDER_CANCER	42	0.488421	1.46464	0.0409536	0.145267	0.107864	3969	tags=24%, list=12%, signal=21%	E2F2/MMP1/CXCL8/MMP9/CDKN2A/VEGFC/E2F1/MYC/PGF/NRAS
KEGG_B_CELL_RECEPTOR_SIGNALING_PATHWAY	KEGG_B_CELL_RECEPTOR_SIGNALING_PATHWAY	75	-0.373012	-1.33564	0.0411362	0.14571	0.108192	6544	tags=31%, list=19%, signal=25%	VAV1/NFAT5/VAV3/NFATC2/IKBKB/PIK3CD/NFKBIA/PIK3CB/CD79A/BLNK/AKT3/CD19/PIK3R1/PIK3CG/PIK3R5/INPP5D/FCGR2B/BTK/DAPP1/SYK/PIK3AP1/CR2/CHP2
REACTOME_BETA_DEFENSINS	REACTOME_BETA_DEFENSINS	30	-0.492088	-1.43485	0.0416502	0.147324	0.10939	10292	tags=53%, list=30%, signal=37%	DEFB127/DEFB103A/DEFB4B/DEFB107B/DEFB133/DEFB115/DEFB4A/DEFB108B/CCR6/DEFB112/TLR1/DEFB121/TLR2/DEFB1/CCR2/DEFB119
REACTOME_RNA_POLYMERASE_II_PRE_TRANSCRIPTION_EVENTS	REACTOME_RNA_POLYMERASE_II_PRE_TRANSCRIPTION_EVENTS	81	0.408726	1.3859	0.041876	0.147915	0.10983	12887	tags=52%, list=37%, signal=33%	TAF7L/ELOA2/EAF2/TAF5/POLR2D/NELFB/NCBP1/SUPT16H/TAF13/SSRP1/POLR2G/ELOA/TAF9/POLR2L/ERCC2/GTF2E2/TAF11/CDC73/POLR2H/GTF2A2/TAF12/GTF2H2/GTF2H3/CCNT1/TAF2/POLR2F/TAF10/ERCC3/GTF2A1/ELOC/NELFE/CCNK/ELL/GTF2E1/GTF2H4/LEO1/POLR2B/SUPT5H/MNAT1/IWS1/GTF2F1/CCNT2
WP_TP53_NETWORK	WP_TP53_NETWORK	19	0.587203	1.51555	0.0421193	0.148566	0.110313	3068	tags=21%, list=9%, signal=19%	TP73/BOK/CDKN2A/MYC
WP_RENINANGIOTENSINALDOSTERONE_SYSTEM_RAAS	WP_RENINANGIOTENSINALDOSTERONE_SYSTEM_RAAS	44	-0.437973	-1.40787	0.0422435	0.148796	0.110484	1083	tags=20%, list=3%, signal=20%	PLCB2/CAMK2A/HSD3B2/AGT/CALML5/CMA1/CREB3L3/CTSG/CYP11B2
WP_PEPTIDE_GPCRS	WP_PEPTIDE_GPCRS	75	-0.370296	-1.32591	0.0440484	0.154937	0.115044	4369	tags=40%, list=13%, signal=35%	NTSR2/HCRTR1/FPR3/CCR1/NPY2R/AVPR2/SSTR5/SSTR1/CCR4/NPY1R/CXCR3/GRPR/NPY4R/C5AR1/FPR2/CCR8/CXCR6/CCKBR/NPY5R/NPY6R/NMBR/CCR5/CCR2/SSTR3/CCR9/CCR3/TACR1/OPRK1/MC3R/CX3CR1
PID_LKB1_PATHWAY	PID_LKB1_PATHWAY	47	0.45606	1.40563	0.0445633	0.156312	0.116065	10389	tags=47%, list=30%, signal=33%	SFN/ETV4/STK26/MYC/BRSK2/BRSK1/YWHAQ/RPTOR/PSEN2/YWHAH/AKT1S1/MAPT/SIK1/STK11IP/SIK2/MTOR/PRKAB1/MARK4/CDC37/STK11/YWHAZ/ESR1
REACTOME_RNA_POLYMERASE_I_TRANSCRIPTION_INITIATION	REACTOME_RNA_POLYMERASE_I_TRANSCRIPTION_INITIATION	47	0.455292	1.40326	0.0445633	0.156312	0.116065	12731	tags=55%, list=37%, signal=35%	POLR1E/TAF1B/TAF1D/MBD3/TAF1A/HDAC2/POLR2L/ERCC2/HDAC1/RBBP4/TTF1/POLR2H/TAF1C/MTA1/GTF2H2/GTF2H3/POLR2F/ERCC3/MTA2/POLR1C/POLR1A/POLR1D/EHMT2/POLR1H/GTF2H4/MNAT1
REACTOME_SYNTHESIS_OF_ACTIVE_UBIQUITIN_ROLES_OF_E1_AND_E2_ENZYMES	REACTOME_SYNTHESIS_OF_ACTIVE_UBIQUITIN_ROLES_OF_E1_AND_E2_ENZYMES	30	0.523202	1.47653	0.0449961	0.157611	0.117029	1020	tags=10%, list=3%, signal=10%	UBE2C/UBE2T/UBE2S
WP_P53_TRANSCRIPTIONAL_GENE_NETWORK	WP_P53_TRANSCRIPTIONAL_GENE_NETWORK	92	0.399318	1.38537	0.0452733	0.158362	0.117587	6735	tags=37%, list=20%, signal=30%	SFN/E2F7/CDC25C/CDC25A/AURKA/ULBP1/CCNE1/ISG15/LIF/SLC7A11/FANCC/CDK2/DDIT4/TP53AIP1/MSH2/SLC2A1/SERPINE1/PERP/CPT1C/PCNA/TP53I3/BTG2/RPTOR/IRF9/SERPINB5/GADD45A/SIVA1/ADORA2B/AKT1S1/GLS2/SCO2/TRAF4/PIDD1/APAF1
WP_T_CELL_RECEPTOR_AND_COSTIMULATORY_SIGNALING	WP_T_CELL_RECEPTOR_AND_COSTIMULATORY_SIGNALING	28	-0.498047	-1.43939	0.0453426	0.158385	0.117604	8089	tags=50%, list=23%, signal=38%	CD28/PTPN6/LCK/NFATC2/NFKBIA/CD8A/IL2/CD8B/RASGRP1/ZAP70/CTLA4/PRKCA/PDCD1/ITK
WP_MITOCHONDRIAL_COMPLEX_IV_ASSEMBLY	WP_MITOCHONDRIAL_COMPLEX_IV_ASSEMBLY	31	-0.480857	-1.4147	0.0461827	0.161096	0.119617	9263	tags=61%, list=27%, signal=45%	TACO1/COX5A/COX11/COX20/COX15/PET117/COX10/COX5B/COX6A1/COX4I1/COX6B1/SMIM20/NDUFA4/COX17/COX6C/COX7C/COX18/COX7B/COX16
BIOCARTA_LIS1_PATHWAY	BIOCARTA_LIS1_PATHWAY	19	0.581549	1.50096	0.0463822	0.161569	0.119968	6723	tags=37%, list=20%, signal=30%	DNAH8/DCX/RELN/LRP8/NDEL1/DCTN3/CDK5R1
REACTOME_RECEPTOR_TYPE_TYROSINE_PROTEIN_PHOSPHATASES	REACTOME_RECEPTOR_TYPE_TYROSINE_PROTEIN_PHOSPHATASES	20	0.586499	1.52652	0.0464684	0.16164	0.120021	5636	tags=65%, list=16%, signal=54%	SLITRK5/SLITRK2/SLITRK6/PTPRF/PTPRD/PPFIA4/LRRC4B/IL1RAPL1/IL1RAP/SLITRK1/PPFIA3/PTPRS/NTRK3
REACTOME_PLASMA_LIPOPROTEIN_CLEARANCE	REACTOME_PLASMA_LIPOPROTEIN_CLEARANCE	37	0.490838	1.43813	0.046595	0.16164	0.120021	3705	tags=24%, list=11%, signal=22%	APOA1/APOB/SOAT2/LDLR/LIPA/CES3/RPS27A/SCARB1/NR1H3
REACTOME_NEURONAL_SYSTEM	REACTOME_NEURONAL_SYSTEM	410	0.308724	1.25784	0.046581	0.16164	0.120021	5839	tags=29%, list=17%, signal=24%	KCNJ6/SLITRK5/CHRNA7/KCNG3/CACNA1E/SLC22A2/GABRA4/GNG13/SYT1/TUBA3C/GABRB1/CACNG2/SLITRK2/GNAT3/KCNF1/SLITRK6/GNB3/KCNC1/GABRQ/GRIN2D/SLC5A7/CHRNA2/TUBB2B/LIN7A/NRGN/CHRNA5/KCNH5/SLC32A1/TUBB6/ADCY1/KPNA2/CHRNA1/GRIK1/KCNK17/KCNN1/GRIN3B/SLC1A1/GNG8/GJC1/GRIN1/PTPRF/NRXN2/PTPRD/GABRG2/NLGN4X/CHRNE/KCNG1/KCNAB3/LRRTM1/KCNG2/SYT12/LRFN2/GLRA2/KCNJ14/TUBB2A/KCND1/PRKCG/KCNV2/LRFN4/KCNK7/PANX2/KCNMA1…
REACTOME_GAP_JUNCTION_ASSEMBLY	REACTOME_GAP_JUNCTION_ASSEMBLY	38	0.484215	1.43209	0.0468468	0.162068	0.120339	5673	tags=45%, list=16%, signal=37%	TUBA3C/TUBB2B/GJD4/TUBB6/GJC1/TUBB2A/GJB5/TUBB3/TUBB4B/GJB2/GJB7/GJA3/GJC2/TUBA1B/TUBB1/TUBA1C/TUBA8
NABA_ECM_AFFILIATED	NABA_ECM_AFFILIATED	170	-0.306951	-1.23971	0.0467849	0.162068	0.120339	4819	tags=28%, list=14%, signal=24%	C1QL3/LGALS7/ANXA8L1/SEMA3C/LGALS3/ANXA8/CLEC4A/ANXA13/GPC4/CLEC6A/MUC4/C1QTNF9/CLEC5A/C1QTNF1/CLEC3A/SEMA3G/ANXA4/CLEC4E/LGALS9B/CLEC12A/COLEC11/SFTA2/CLEC2A/LGALS12/PARM1/CLEC1B/COLEC12/CLEC7A/MUCL1/SDC4/CLEC4C/SEMA6A/GRIFIN/GPC5/REG4/MUC6/LGALS13/C1QTNF8/LGALS9C/SEMA3E/REG3G/CLEC10A/CLEC17A/SFTPB/FREM3/COLEC10/CLEC9A/ANXA3
REACTOME_SIGNALING_BY_NOTCH4	REACTOME_SIGNALING_BY_NOTCH4	82	0.404063	1.36938	0.0470588	0.162579	0.120718	12211	tags=51%, list=35%, signal=33%	TACC3/JAG1/HEY2/RPS27A/HES1/PSMB7/HES5/PSMB5/PSEN2/PSMD14/PSMD1/UBA52/PSMB9/PSMA4/PSMA5/PSMC1/HEY1/PSMC3/PSMD11/PSMA6/PSMB2/PSMA1/NOTCH1/PSMC6/PSMD2/RBX1/ADAM10/SNW1/PSMD13/YWHAZ/PSMA3/PSMB4/PSMD4/PSME1/PSMC4/UBC/SMAD3/PSME2/PSMA2/PSMD5/PSMD8/PSMA7
REACTOME_TRANSPORT_TO_THE_GOLGI_AND_SUBSEQUENT_MODIFICATION	REACTOME_TRANSPORT_TO_THE_GOLGI_AND_SUBSEQUENT_MODIFICATION	186	0.331862	1.26435	0.0471281	0.162595	0.12073	6471	tags=20%, list=19%, signal=17%	LHB/MGAT4C/CGA/ST8SIA3/TUBA3C/ST8SIA2/AREG/CNIH2/TUBB2B/TUBB6/KDELR3/COL7A1/TUBB2A/TUBB3/B4GALT2/TUBB4B/INS/ST3GAL4/SPTA1/LMAN1L/TUBA1B/TUBB1/FUT3/SPTBN5/MGAT5/CHST10/TUBA1C/MGAT2/TRAPPC5/CNIH1/TUBA8/FOLR1/DCTN2/LMAN2L/B4GALT1/F5/DCTN3/TUBA3D
REACTOME_AMINE_LIGAND_BINDING_RECEPTORS	REACTOME_AMINE_LIGAND_BINDING_RECEPTORS	41	0.473484	1.41508	0.0473588	0.163168	0.121155	2183	tags=24%, list=6%, signal=23%	HTR2C/HTR1D/HTR5A/ADRA2C/HTR6/DRD4/DRD3/CHRM3/CHRM4/HTR1E
WP_FAMILIAL_PARTIAL_LIPODYSTROPHY	WP_FAMILIAL_PARTIAL_LIPODYSTROPHY	30	0.521734	1.47239	0.0476904	0.164086	0.121837	3456	tags=27%, list=10%, signal=24%	CIDEA/LMNB1/LPL/FABP4/LMNB2/GATA3/INS/KLF5
WP_FAMILIAL_HYPERLIPIDEMIA_TYPE_4	WP_FAMILIAL_HYPERLIPIDEMIA_TYPE_4	22	0.560918	1.49533	0.0477941	0.164219	0.121936	1647	tags=27%, list=5%, signal=26%	APOA1/PDIA2/APOA2/LPL/ACSS1/LDLR
WP_PLURIPOTENT_STEM_CELL_DIFFERENTIATION_PATHWAY	WP_PLURIPOTENT_STEM_CELL_DIFFERENTIATION_PATHWAY	48	0.447886	1.38872	0.0479574	0.164556	0.122186	4306	tags=38%, list=13%, signal=33%	DKK1/WNT5A/CXCR1/IL6/LEFTY1/IL11/ALK/WNT2/NT5E/NODAL/GDF5/EPO/TGFB3/INS/FGF10/FGF8/TPO/NOG
WP_SMALL_CELL_LUNG_CANCER	WP_SMALL_CELL_LUNG_CANCER	96	0.382922	1.34003	0.0482315	0.165272	0.122717	2318	tags=16%, list=7%, signal=15%	LAMA1/E2F2/PTGS2/RXRG/LAMA4/CCNE2/COL4A2/E2F1/FN1/CKS1B/CCNE1/ITGA2B/COL4A1/CDK2/CKS2
REACTOME_MATURATION_OF_SARSCOV2_SPIKE_PROTEIN	REACTOME_MATURATION_OF_SARSCOV2_SPIKE_PROTEIN	37	0.485186	1.42158	0.0483871	0.16558	0.122946	10989	tags=65%, list=32%, signal=44%	MGAT4C/ZDHHC11/ST3GAL4/ST3GAL3/DAD1/MGAT5/ST6GALNAC3/MGAT2/ST6GALNAC2/MOGS/MAN1B1/STT3A/ST6GAL1/GANAB/PRKCSH/ST6GALNAC4/ZDHHC8/RPN1/ZDHHC20/ST3GAL1/RPN2/DDOST/MAGT1/ST3GAL2
REACTOME_HDR_THROUGH_MMEJ_ALT_NHEJ	REACTOME_HDR_THROUGH_MMEJ_ALT_NHEJ	12	0.654369	1.49417	0.0486891	0.166162	0.123379	1177	tags=25%, list=3%, signal=24%	POLQ/BRCA2/FEN1
PID_MYC_PATHWAY	PID_MYC_PATHWAY	25	0.546307	1.48719	0.0486486	0.166162	0.123379	10257	tags=56%, list=30%, signal=39%	CDKN2A/MYC/SKP2/RUVBL2/TAF9/RUVBL1/ACTL6A/SUPT3H/PIN1/TAF12/ZBTB17/TAF10/SUPT7L/PPP2R5A
KEGG_STEROID_BIOSYNTHESIS	KEGG_STEROID_BIOSYNTHESIS	17	0.619488	1.55827	0.0488137	0.166362	0.123527	3994	tags=65%, list=12%, signal=57%	SOAT2/SQLE/FDFT1/DHCR7/CYP27B1/HSD17B7/LIPA/SC5D/NSDHL/CYP51A1/LSS
REACTOME_NEGATIVE_REGULATION_OF_MAPK_PATHWAY	REACTOME_NEGATIVE_REGULATION_OF_MAPK_PATHWAY	43	0.468558	1.41267	0.0490909	0.167081	0.124061	8177	tags=47%, list=24%, signal=36%	MAPK12/DUSP5/DUSP8/RPS27A/NRAS/PPP2R1A/DUSP6/PPP2R5C/UBA52/PPP2R1B/HRAS/DUSP2/PTPN3/PPP5C/KSR1/PTPN7/MARK3/PPP2R5D/DUSP16/PPP2R5E
WP_CILIOPATHIES	WP_CILIOPATHIES	177	0.337012	1.28088	0.0493263	0.167656	0.124488	4663	tags=16%, list=14%, signal=14%	NEK2/CENPF/MCIDAS/PCARE/PKHD1/ZIC2/GLI2/DNAAF1/POC1A/KIF7/PLK4/ZMYND10/DNAJB13/RP1/GPR161/CRX/DNAI2/CCNO/FAM161A/TMEM237/DRC1/DNAH11/CEP164/DYNC2I2/TULP1/HYLS1/GLI3/PDE6D
WP_MONOAMINE_GPCRS	WP_MONOAMINE_GPCRS	33	0.506572	1.4687	0.04947	0.167918	0.124682	2183	tags=30%, list=6%, signal=28%	HTR2C/HTR1D/HTR5A/ADRA2C/HTR6/DRD4/DRD3/CHRM3/CHRM4/HTR1E
NABA_BASEMENT_MEMBRANES	NABA_BASEMENT_MEMBRANES	40	0.473553	1.41257	0.0508167	0.172258	0.127905	5545	tags=40%, list=16%, signal=34%	LAMA1/NID2/COL6A3/LAMA4/NTNG1/COL4A2/COL4A1/NTNG2/NTN5/NTN1/COL6A2/LAMA2/PAPLN/NID1/LAMC1/COL15A1
REACTOME_HIV_INFECTION	REACTOME_HIV_INFECTION	231	0.318364	1.23249	0.0512445	0.173475	0.128808	10507	tags=40%, list=31%, signal=28%	PSMA8/TAF7L/FEN1/ELOA2/LIG1/PSME4/RCC1/RAN/NUP188/RANBP1/RPS27A/NDC1/HMGA1/NUP107/NUP62/TAF5/NUP85/PSMB7/POLR2D/NELFB/AP1S1/NUP155/RANGAP1/PSMB5/NCBP1/SUPT16H/TAF13/SSRP1/KPNB1/PSMD14/PSMD1/UBA52/POLR2G/ELOA/PSIP1/PSMB9/XPO1/TAF9/PSMA4/PPIA/AP2S1/PSMA5/POLR2L/CHMP4A/ERCC2/PSMC1/XRCC5/PSMC3/PSMD11/GTF2E2/NEDD4L/NUP35/PSMA6/NUP160/PSMB2/PSMA1/RNGTT/XRCC6/TAF11/NUP58/NUP93/POLR2H/GTF2A2/TAF12/PSMC6/…
REACTOME_RECYCLING_PATHWAY_OF_L1	REACTOME_RECYCLING_PATHWAY_OF_L1	49	0.461321	1.44227	0.0516152	0.174495	0.129566	6471	tags=33%, list=19%, signal=27%	KIF4A/TUBA3C/TUBB2B/DNM1/TUBB6/TUBB2A/TUBB3/TUBB4B/L1CAM/KIF4B/TUBA1B/TUBB1/TUBA1C/TUBA8/SHTN1/TUBA3D
WP_PHOTODYNAMIC_THERAPYINDUCED_NFKB_SURVIVAL_SIGNALING	WP_PHOTODYNAMIC_THERAPYINDUCED_NFKB_SURVIVAL_SIGNALING	35	0.490476	1.4352	0.0520646	0.175779	0.130519	914	tags=17%, list=3%, signal=17%	BIRC5/MMP1/CXCL8/MMP9/PTGS2/IL6
REACTOME_ANTIGEN_ACTIVATES_B_CELL_RECEPTOR_BCR_LEADING_TO_GENERATION_OF_SECOND_MESSENGERS	REACTOME_ANTIGEN_ACTIVATES_B_CELL_RECEPTOR_BCR_LEADING_TO_GENERATION_OF_SECOND_MESSENGERS	86	-0.362113	-1.32678	0.0525446	0.177162	0.131546	6851	tags=37%, list=20%, signal=30%	IGLV3-19/IGKV1-33/IGHV3-30/ORAI2/VAV1/ITPR2/IGKV2D-28/PIK3CD/IGLV6-57/CD79A/IGHV3-13/IGLV1-40/IGKV2-28/IGHV4-34/BLNK/IGKV1D-33/CD19/PIK3R1/IGHV4-59/BTK/DAPP1/SYK/IGKV1-16/PIK3AP1/IGHM/IGKV1-39/IGHV1-46/IGKV1D-12/IGLV3-27/IGKV1-17/IGLV7-43/IGHD
WP_COMMON_PATHWAYS_UNDERLYING_DRUG_ADDICTION	WP_COMMON_PATHWAYS_UNDERLYING_DRUG_ADDICTION	41	-0.444097	-1.40986	0.0527705	0.177687	0.131936	4439	tags=27%, list=13%, signal=23%	DRD1/PPP1R1A/GRIN2A/PRKCA/GRIA3/PRKACG/CAMK2A/GRM5/GRIA2/ADCY8/GJB1
REACTOME_SLC_MEDIATED_TRANSMEMBRANE_TRANSPORT	REACTOME_SLC_MEDIATED_TRANSMEMBRANE_TRANSPORT	248	0.314282	1.23039	0.0530846	0.178506	0.132544	4456	tags=21%, list=13%, signal=19%	SLCO1B1/SLC4A1/SLC22A11/SLCO1A2/SLC22A2/SLC6A5/SLCO4C1/SLC5A1/SLC6A7/SLC5A7/SLC2A6/SLC22A16/RHAG/SLC9A5/SLC30A10/SLC26A7/SLC32A1/SLC2A3/SLC1A1/SLC7A2/SLC7A5/SLC16A8/SLC20A1/RHBG/SLC26A9/SLC2A14/SLC9A3/SLC7A11/SLC26A6/SLC2A2/SLC38A5/SLC2A7/LCN12/SLC28A3/SLC13A5/SLC31A1/SLC2A1/SLC1A5/SLC22A8/SLC15A1/SLC1A4/SLC41A1/SLC16A1/SLC7A9/SLC25A22/SLC17A8/SLC7A7/SLC34A3/SLC9A4/SLC22A1/SLC1A2/SLC1A3/SLC34A1
REACTOME_TRANSCRIPTIONAL_ACTIVITY_OF_SMAD2_SMAD3_SMAD4_HETEROTRIMER	REACTOME_TRANSCRIPTIONAL_ACTIVITY_OF_SMAD2_SMAD3_SMAD4_HETEROTRIMER	51	0.444526	1.39004	0.05386	0.180872	0.134301	9502	tags=41%, list=28%, signal=30%	COL1A2/RBL1/MYC/YBX1/SERPINE1/RPS27A/CDK8/ATP1B4/TGIF2/STAT1/TFDP1/UBA52/CCNC/TGIF1/NEDD4L/HDAC1/WWTR1/PARP1/SNW1/CCNT1/SMAD2
WP_EDA_SIGNALING_IN_HAIR_FOLLICLE_DEVELOPMENT	WP_EDA_SIGNALING_IN_HAIR_FOLLICLE_DEVELOPMENT	13	0.637784	1.48411	0.0540037	0.181114	0.13448	3871	tags=46%, list=11%, signal=41%	DKK1/GLI1/EDAR/BMP1/WNT3/DKK4
WP_OVERVIEW_OF_PROINFLAMMATORY_AND_PROFIBROTIC_MEDIATORS	WP_OVERVIEW_OF_PROINFLAMMATORY_AND_PROFIBROTIC_MEDIATORS	124	0.353466	1.27287	0.0544323	0.182309	0.135368	2999	tags=21%, list=9%, signal=19%	CCL20/MMP1/CSF3/CXCL8/IL26/CCL22/CCL18/MMP9/IL37/CXCL3/AREG/CXCL1/PPBP/IL36G/IL6/IL11/LIF/IFNA5/IFNB1/IL17C/TNFSF13B/IL21/EPO/IFNG/CXCL13/CCL24
BIOCARTA_P53_PATHWAY	BIOCARTA_P53_PATHWAY	16	0.599874	1.49399	0.0547445	0.182868	0.135783	7099	tags=50%, list=21%, signal=40%	E2F1/CCNE1/CDK2/PCNA/GADD45A/CDK4/APAF1/BAX
WP_FAMILIAL_HYPERLIPIDEMIA_TYPE_2	WP_FAMILIAL_HYPERLIPIDEMIA_TYPE_2	16	0.598569	1.49074	0.0547445	0.182868	0.135783	1647	tags=31%, list=5%, signal=30%	APOA1/APOA2/APOB/LPL/LDLR
REACTOME_EPHB_MEDIATED_FORWARD_SIGNALING	REACTOME_EPHB_MEDIATED_FORWARD_SIGNALING	42	0.463781	1.39075	0.0548446	0.18296	0.135852	7853	tags=38%, list=23%, signal=29%	EFNB3/GRIN1/EPHB3/EFNB1/ARPC1B/ARPC2/LIMK1/ACTR3/EPHB2/YES1/ACTR2/HRAS/CFL1/EFNB2/GRIN2B/PAK1
PID_IL3_PATHWAY	PID_IL3_PATHWAY	26	-0.51493	-1.46207	0.0549471	0.18306	0.135926	3533	tags=31%, list=10%, signal=28%	CSF2RB/BCL2L1/PIK3R1/STAT5B/STAT5A/PRKACG/IL3/CISH
WP_FAMILIAL_HYPERLIPIDEMIA_TYPE_1	WP_FAMILIAL_HYPERLIPIDEMIA_TYPE_1	18	0.584524	1.49767	0.0552486	0.183822	0.136491	1954	tags=33%, list=6%, signal=31%	APOA1/APOA2/ANGPTL4/LPL/LDLR/ANGPTL3
SIG_REGULATION_OF_THE_ACTIN_CYTOSKELETON_BY_RHO_GTPASES	SIG_REGULATION_OF_THE_ACTIN_CYTOSKELETON_BY_RHO_GTPASES	35	0.485575	1.42085	0.0556553	0.184688	0.137134	8186	tags=49%, list=24%, signal=37%	MYH2/MYLK2/FSCN3/FSCN1/RHO/FSCN2/LIMK1/ACTR3/PFN2/PAK4/ACTR2/ACTG2/CFL1/GDI2/PAK6/PAK1/FLNA
REACTOME_RHOA_GTPASE_CYCLE	REACTOME_RHOA_GTPASE_CYCLE	149	0.33912	1.25404	0.0556391	0.184688	0.137134	3380	tags=15%, list=10%, signal=14%	IQGAP3/PCDH7/ANLN/ARHGAP8/DIAPH3/RACGAP1/ARHGAP11A/ARHGAP11B/NGEF/DEPDC1B/TFRC/ECT2/PLEKHG4/DLC1/CIT/PKN3/ARHGEF25/SOWAHC/ARHGEF2/ARHGAP28/LBR/ARHGEF19/ARHGEF4
WP_BMP2WNT4FOXO1_PATHWAY_IN_PRIMARY_ENDOMETRIAL_STROMAL_CELL_DIFFERENTIATION	WP_BMP2WNT4FOXO1_PATHWAY_IN_PRIMARY_ENDOMETRIAL_STROMAL_CELL_DIFFERENTIATION	13	0.631046	1.46843	0.0558659	0.185143	0.137472	3979	tags=38%, list=12%, signal=34%	DKK1/LEFTY2/DCN/SFRP1/WNT4
REACTOME_DSCAM_INTERACTIONS	REACTOME_DSCAM_INTERACTIONS	11	0.658591	1.48917	0.0562852	0.185871	0.138012	3167	tags=36%, list=9%, signal=33%	MAPK12/MAPK11/NTN1/DCC
REACTOME_REGULATION_OF_SIGNALING_BY_NODAL	REACTOME_REGULATION_OF_SIGNALING_BY_NODAL	11	0.653346	1.47731	0.0562852	0.185871	0.138012	3914	tags=45%, list=11%, signal=40%	LEFTY2/LEFTY1/CER1/NODAL/TDGF1P3
REACTOME_FCERI_MEDIATED_CA_2_MOBILIZATION	REACTOME_FCERI_MEDIATED_CA_2_MOBILIZATION	86	-0.359011	-1.31542	0.0563799	0.185871	0.138012	6851	tags=36%, list=20%, signal=29%	IGLV3-19/IGKV1-33/IGHV3-30/VAV1/ITPR2/VAV3/NFATC2/IGKV2D-28/FCER1G/LAT/IGLV6-57/FCER1A/IGHV3-13/IGLV1-40/IGKV2-28/IGHV4-34/IGKV1D-33/LCP2/IGHV4-59/BTK/GRAP2/SYK/ITK/IGKV1-16/IGKV1-39/IGHV1-46/IGKV1D-12/IGLV3-27/IGKV1-17/IGLV7-43/MS4A2
WP_NUCLEAR_RECEPTORS_METAPATHWAY	WP_NUCLEAR_RECEPTORS_METAPATHWAY	314	-0.274527	-1.19155	0.0563803	0.185871	0.138012	5532	tags=26%, list=16%, signal=22%	TSC22D3/NR3C1/SLC6A4/SLC10A1/BIRC3/SLC6A14/IL12B/SLC2A13/SLC5A9/GCC1/SRC/CPEB4/GSTA5/SLC27A1/GSTA1/IL2/SLC39A12/G6PD/EHHADH/IRS2/DNAJC15/SLC5A11/SOD3/TNS4/SLC6A17/SRGN/SLC2A8/MGST2/GSTM5/SLC39A14/CDKN1C/IL17B/NR1I2/UGT2B4/AMIGO2/GPX3/NRG1/CES4A/IL12A/TGFBR2/CYP4A11/ALDH3A1/NR0B2/SLC6A2/CYP7A1/RGS2/KLK15/SERPINB9/ETNK2/SLCO2B1/ADH7/SQSTM1/CYP8B1/HGF/DNER/SLC6A20/SERPINA1/TNF/UGT1A6/SLC6A3/FGFBP1/C…
REACTOME_NUCLEOTIDE_BIOSYNTHESIS	REACTOME_NUCLEOTIDE_BIOSYNTHESIS	14	0.619253	1.48262	0.0564663	0.185911	0.138043	12527	tags=93%, list=36%, signal=59%	IMPDH1/CAD/ADSL/GART/GMPS/ADSS1/PPAT/UMPS/ATIC/PAICS/ADSS2/IMPDH2/PFAS
REACTOME_TP53_REGULATES_TRANSCRIPTION_OF_CASPASE_ACTIVATORS_AND_CASPASES	REACTOME_TP53_REGULATES_TRANSCRIPTION_OF_CASPASE_ACTIVATORS_AND_CASPASES	12	0.662076	1.51177	0.0571539	0.18793	0.139541	9168	tags=58%, list=27%, signal=43%	TP73/CASP1/PIDD1/APAF1/CRADD/CASP6/CASP2
WP_VITAMIN_B12_METABOLISM	WP_VITAMIN_B12_METABOLISM	50	0.438524	1.37506	0.0577933	0.189785	0.140919	3890	tags=32%, list=11%, signal=28%	TCN1/APOA1/SAA4/HBB/APOB/IL6/LDLR/CBS/LRP2/HBA1/MPO/IFNG/INS/SERPINE1/SCARB1/SHMT2
WP_INTERLEUKIN11_SIGNALING_PATHWAY	WP_INTERLEUKIN11_SIGNALING_PATHWAY	44	0.458438	1.39304	0.0581818	0.190812	0.141682	2863	tags=14%, list=8%, signal=13%	BIRC5/IBSP/IL11/IL11RA/SOCS3/RUNX2
REACTOME_GRB2_SOS_PROVIDES_LINKAGE_TO_MAPK_SIGNALING_FOR_INTEGRINS	REACTOME_GRB2_SOS_PROVIDES_LINKAGE_TO_MAPK_SIGNALING_FOR_INTEGRINS	15	-0.590088	-1.46832	0.0584416	0.191167	0.141945	1922	tags=27%, list=6%, signal=25%	FGB/APBB1IP/FGG/FGA
WP_FACTORS_AND_PATHWAYS_AFFECTING_INSULINLIKE_GROWTH_FACTOR_IGF1AKT_SIGNALING	WP_FACTORS_AND_PATHWAYS_AFFECTING_INSULINLIKE_GROWTH_FACTOR_IGF1AKT_SIGNALING	36	-0.460905	-1.41859	0.058427	0.191167	0.141945	5841	tags=25%, list=17%, signal=21%	TNFSF9/WASL/DEPTOR/IGF1/ACVR2B/PIK3CG/FBXO32/TRIM63/PPARGC1A
WP_4HYDROXYTAMOXIFEN_DEXAMETHASONE_AND_RETINOIC_ACIDS_REGULATION_OF_P27_EXPRESSION	WP_4HYDROXYTAMOXIFEN_DEXAMETHASONE_AND_RETINOIC_ACIDS_REGULATION_OF_P27_EXPRESSION	18	0.58106	1.4888	0.0589319	0.192521	0.14295	2558	tags=11%, list=7%, signal=10%	PBK/EIF4EBP1
REACTOME_DEFECTIVE_CFTR_CAUSES_CYSTIC_FIBROSIS	REACTOME_DEFECTIVE_CFTR_CAUSES_CYSTIC_FIBROSIS	61	0.430753	1.40508	0.0590766	0.192701	0.143084	12211	tags=59%, list=35%, signal=38%	PSMA8/PSME4/DERL3/RPS27A/PSMB7/PSMB5/PSMD14/PSMD1/UBA52/PSMB9/PSMA4/PSMA5/PSMC1/OS9/PSMC3/PSMD11/PSMA6/PSMB2/PSMA1/PSMC6/PSMD2/VCP/PSMD13/PSMA3/ERLIN1/PSMB4/PSMD4/PSME1/PSMC4/ERLEC1/UBC/PSME2/PSMA2/PSMD5/PSMD8/PSMA7
WP_MICROTUBULE_CYTOSKELETON_REGULATION	WP_MICROTUBULE_CYTOSKELETON_REGULATION	46	0.448178	1.37188	0.0591398	0.192701	0.143084	754	tags=9%, list=2%, signal=9%	KIF2C/AURKB/CDK1/STMN1
REACTOME_PLATELET_SENSITIZATION_BY_LDL	REACTOME_PLATELET_SENSITIZATION_BY_LDL	17	0.591313	1.4874	0.0593692	0.19295	0.143269	10509	tags=65%, list=31%, signal=45%	APOB/LRP8/PPP2R1A/PPP2R5C/PLA2G4A/PPP2R1B/PPP2R5D/PPP2R5E/PPP2R5B/PPP2R5A/MAPK14
REACTOME_RNA_POLYMERASE_I_TRANSCRIPTION_TERMINATION	REACTOME_RNA_POLYMERASE_I_TRANSCRIPTION_TERMINATION	31	0.499884	1.42375	0.0593525	0.19295	0.143269	12731	tags=61%, list=37%, signal=39%	POLR1E/TAF1B/TAF1D/TAF1A/POLR2L/ERCC2/TTF1/POLR2H/TAF1C/GTF2H2/GTF2H3/POLR2F/ERCC3/POLR1C/POLR1A/POLR1D/POLR1H/GTF2H4/MNAT1
WP_TAMOXIFEN_METABOLISM	WP_TAMOXIFEN_METABOLISM	21	-0.547806	-1.4537	0.0594714	0.193033	0.143331	3153	tags=38%, list=9%, signal=35%	UGT2B15/SULT1E1/CYP2C8/CYP2A6/CYP3A5/UGT1A8/FMO3/CYP3A4
WP_NETWORK_MAP_OF_SARSCOV2_SIGNALING_PATHWAY	WP_NETWORK_MAP_OF_SARSCOV2_SIGNALING_PATHWAY	217	0.317407	1.22346	0.0596798	0.193461	0.143648	5053	tags=22%, list=15%, signal=19%	APOA1/RRM2/CCNB2/BIRC5/CCL20/CDK1/CXCL8/ACE2/GTSE1/CCL22/APOA2/HBB/PTGS2/CCNB1/CXCL3/CXCL1/CXCR1/IL6/HBD/FN1/IFI27/COL7A1/ITIH3/IFNB1/CASP5/IFI6/LRG1/EIF4EBP1/DDIT4/IL21/IFNG/CXCL13/CFP/SERPINE1/CAMK4/TRAF2/IGLL1/TPO/PRKCQ/STEAP3/TP53I3/OAS2/PARP2/STAT1/RPTOR/CXCR2/IFITM3/IRF9
WP_METABOLIC_PATHWAY_OF_LDL_HDL_AND_TG_INCLUDING_DISEASES	WP_METABOLIC_PATHWAY_OF_LDL_HDL_AND_TG_INCLUDING_DISEASES	17	0.605583	1.5233	0.0599874	0.193609	0.143758	1647	tags=35%, list=5%, signal=34%	APOA1/APOA2/LIPG/APOB/LPL/LDLR
REACTOME_HIGHLY_CALCIUM_PERMEABLE_POSTSYNAPTIC_NICOTINIC_ACETYLCHOLINE_RECEPTORS	REACTOME_HIGHLY_CALCIUM_PERMEABLE_POSTSYNAPTIC_NICOTINIC_ACETYLCHOLINE_RECEPTORS	11	0.650336	1.4705	0.0600375	0.193609	0.143758	3671	tags=55%, list=11%, signal=49%	CHRNA7/CHRNA2/CHRNA5/CHRNA1/CHRNA4/CHRNB4
REACTOME_ANDROGEN_BIOSYNTHESIS	REACTOME_ANDROGEN_BIOSYNTHESIS	11	0.648219	1.46572	0.0600375	0.193609	0.143758	902	tags=27%, list=3%, signal=27%	LHB/CGA/HSD17B3
WP_SEROTONIN_AND_ANXIETYRELATED_EVENTS	WP_SEROTONIN_AND_ANXIETYRELATED_EVENTS	14	0.608981	1.45803	0.0601093	0.193609	0.143758	2790	tags=21%, list=8%, signal=20%	HTR2C/GRIN2D/NLGN1
PID_HNF3B_PATHWAY	PID_HNF3B_PATHWAY	44	0.458178	1.39225	0.06	0.193609	0.143758	4117	tags=32%, list=12%, signal=28%	FOXA2/APOA1/FOXA3/PCK1/FOXA1/TFRC/HMGCS1/NKX2-1/SLC2A2/PKLR/INS/CPT1B/CPT1C/TTR
WP_GPR143_IN_MELANOCYTES_AND_RETINAL_PIGMENT_EPITHELIUM_CELLS	WP_GPR143_IN_MELANOCYTES_AND_RETINAL_PIGMENT_EPITHELIUM_CELLS	30	-0.468595	-1.36635	0.0608108	0.195261	0.144985	3209	tags=27%, list=9%, signal=24%	GNA15/ASIP/PLCB2/PRKACG/DCT/MITF/ADCY2/TYR
REACTOME_TRANSLATION_OF_SARSCOV2_STRUCTURAL_PROTEINS	REACTOME_TRANSLATION_OF_SARSCOV2_STRUCTURAL_PROTEINS	57	0.42233	1.35125	0.0609319	0.195261	0.144985	11100	tags=53%, list=32%, signal=36%	MGAT4C/ZDHHC11/RPS27A/ST3GAL4/ST3GAL3/DAD1/MGAT5/ST6GALNAC3/MGAT2/UBA52/ST6GALNAC2/MOGS/MAN1B1/STT3A/ST6GAL1/SUMO1/GANAB/SRPK1/PRKCSH/PRMT1/ST6GALNAC4/ZDHHC8/RPN1/ZDHHC20/ST3GAL1/RPN2/DDOST/MAGT1/ST3GAL2/UBC
WP_TCELL_ACTIVATION_SARSCOV2	WP_TCELL_ACTIVATION_SARSCOV2	88	-0.361074	-1.32448	0.0608451	0.195261	0.144985	6752	tags=32%, list=20%, signal=26%	STAT4/CD3G/CD3D/LCK/IKBKB/PIK3CD/LAT/NFKBIA/IL12B/IL2/DEPTOR/RASGRP1/ZAP70/CD86/CTLA4/BCL2L1/LCP2/PIK3R1/CD3E/CD247/IL12A/CD4/TNF/GRAP2/HLA-DRB1/PTPRC/HLA-DRA/CCL19
KEGG_NATURAL_KILLER_CELL_MEDIATED_CYTOTOXICITY	KEGG_NATURAL_KILLER_CELL_MEDIATED_CYTOTOXICITY	130	-0.326378	-1.27163	0.0609163	0.195261	0.144985	6544	tags=35%, list=19%, signal=28%	VAV1/HLA-G/NFAT5/VAV3/LCK/NFATC2/HLA-C/SH3BP2/PIK3CD/SHC2/FCER1G/KIR2DL4/LAT/PIK3CB/ZAP70/FASLG/HLA-E/CD244/ITGB2/HLA-B/TYROBP/KIR2DL1/KLRD1/LCP2/PIK3R1/PRKCA/HCST/PIK3CG/HLA-A/IFNGR1/PIK3R5/CD247/SH2D1B/ITGAL/CD48/KIR3DL1/CSF2/TNFRSF10D/TNF/KIR3DL2/SH2D1A/SYK/NCR3/NCR1/CHP2
WP_PRIMARY_FOCAL_SEGMENTAL_GLOMERULOSCLEROSIS_FSGS	WP_PRIMARY_FOCAL_SEGMENTAL_GLOMERULOSCLEROSIS_FSGS	72	0.409741	1.37838	0.0611552	0.19548	0.145147	4633	tags=21%, list=13%, signal=18%	WT1/LMX1B/MKI67/DKK1/DNM1/ITGB3/KIRREL2/FAT1/TRPC6/JAG1/VIM/PAX2/PCNA/NPHS1/YWHAQ
REACTOME_APOPTOTIC_EXECUTION_PHASE	REACTOME_APOPTOTIC_EXECUTION_PHASE	52	0.43754	1.37709	0.0611511	0.19548	0.145147	7557	tags=35%, list=22%, signal=27%	CLSPN/H1-5/LMNB1/H1-4/HMGB2/H1-2/STK26/H1-3/VIM/PRKCQ/PKP1/CASP7/KPNB1/MAPT/CASP3/H1-0/BIRC2/OCLN
REACTOME_TP53_REGULATES_TRANSCRIPTION_OF_GENES_INVOLVED_IN_CYTOCHROME_C_RELEASE	REACTOME_TP53_REGULATES_TRANSCRIPTION_OF_GENES_INVOLVED_IN_CYTOCHROME_C_RELEASE	20	0.566139	1.47353	0.0613383	0.195817	0.145397	9565	tags=50%, list=28%, signal=36%	TP73/TP53AIP1/AIFM2/STEAP3/PRELID3A/BAX/PRELID1/PMAIP1/PPP1R13B/TRIAP1
REACTOME_SYNAPTIC_ADHESION_LIKE_MOLECULES	REACTOME_SYNAPTIC_ADHESION_LIKE_MOLECULES	21	0.551165	1.46435	0.0620438	0.197819	0.146884	5582	tags=43%, list=16%, signal=36%	GRIN2D/GRIN1/PTPRF/PTPRD/LRFN2/LRFN4/GRIN2C/GRIA4/PTPRS
WP_NOTCH_SIGNALING_PATHWAY	WP_NOTCH_SIGNALING_PATHWAY	61	0.410225	1.33811	0.0622837	0.198333	0.147266	6598	tags=25%, list=19%, signal=20%	MAGEA1/HES6/GATA3/JAG1/HEY2/MYC/NUMBL/DLL1/TLE1/HES1/HES5/PSEN2/NOTCH3/MAPT/HDAC2
REACTOME_SULFUR_AMINO_ACID_METABOLISM	REACTOME_SULFUR_AMINO_ACID_METABOLISM	27	-0.487877	-1.40278	0.0625	0.19877	0.147591	4667	tags=30%, list=14%, signal=26%	CDO1/SUOX/MAT1A/SQOR/TSTD1/GADL1/BHMT2/BHMT
REACTOME_P130CAS_LINKAGE_TO_MAPK_SIGNALING_FOR_INTEGRINS	REACTOME_P130CAS_LINKAGE_TO_MAPK_SIGNALING_FOR_INTEGRINS	15	-0.58877	-1.46504	0.0627706	0.19916	0.14788	1922	tags=27%, list=6%, signal=25%	FGB/APBB1IP/FGG/FGA
REACTOME_ENDOGENOUS_STEROLS	REACTOME_ENDOGENOUS_STEROLS	26	-0.495431	-1.4067	0.0627803	0.19916	0.14788	3525	tags=31%, list=10%, signal=28%	ARNT2/CYP27A1/CYP4V2/CYP11B1/CYP7A1/CYP8B1/CYP7B1/CYP11B2

## Sheet: 2.AML
ID	Description	setSize	enrichmentScore	NES	pvalue	p.adjust	qvalue	rank	leading_edge	core_enrichment
REACTOME_CELL_CYCLE_CHECKPOINTS	REACTOME_CELL_CYCLE_CHECKPOINTS	237	0.66675	3.0438	1e-10	7.58125e-09	6.01645e-09	1898	tags=43%, list=15%, signal=37%	CDC45/CDCA8/MCM10/CDC20/CENPE/CCNB2/NDC80/UBE2C/SKA1/CENPM/CENPN/UBE2S/CCNA2/CDK1/ERCC6L/MAD2L1/KIF18A/BIRC5/AURKB/CHEK1/CCNB1/MCM5/MCM2/KIF2C/CDC25A/CDC6/PLK1/BUB1B/GTSE1/EXO1/ZWINT/CENPU/SPC25/CENPI/CCNE1/ORC6/ORC1/CCNE2/MCM6/MCM4/DBF4/RFC4/CENPA/BUB1/CENPF/H2BC12/PSMA7/PSMD3/ZWILCH/BLM/CDKN2A/PSMB9/DNA2/H2BC11/PSMB5/CDC7/MCM7/PSMD7/DSN1/RFC2/KNTC1/PSME2/SFN/PSMB3/PKMYT1/CDC25C/PSMA4/NSD2/MCM3/…
REACTOME_MITOTIC_G1_PHASE_AND_G1_S_TRANSITION	REACTOME_MITOTIC_G1_PHASE_AND_G1_S_TRANSITION	142	0.70095	3.0021	1e-10	7.58125e-09	6.01645e-09	1151	tags=41%, list=9%, signal=37%	CDC45/MCM10/MYBL2/TOP2A/RRM2/CCNA2/CDK1/CDT1/CCNB1/MCM5/MCM2/CDC25A/CDC6/TK1/CCNE1/ORC6/ORC1/CKS1B/CCNE2/MCM6/MCM4/DBF4/SKP2/TYMS/MYC/PCNA/PPP2R3B/PSMA7/PSMD3/FBXO5/GMNN/E2F1/CDKN2A/PSMB9/DHFR/LYN/PSMB5/CDC7/POLE2/POLA2/MCM7/PSMD7/PRIM1/PSME2/PSMB3/E2F3/CDKN2C/PSMA4/CDK4/PRIM2/MCM3/PSMB2/PSMA3/PSMA5/PSMB7/TFDP1/PSMD14/E2F5
REACTOME_DNA_REPLICATION	REACTOME_DNA_REPLICATION	137	0.695821	2.95609	1e-10	7.58125e-09	6.01645e-09	1763	tags=49%, list=14%, signal=42%	CDC45/MCM10/UBE2C/UBE2S/CCNA2/GINS1/CDT1/GINS2/MCM5/MCM2/CDC6/CCNE1/ORC6/ORC1/CCNE2/MCM6/MCM4/FEN1/DBF4/SKP2/RFC4/GINS4/H2AZ1/H2BC12/PCNA/PSMA7/GINS3/PSMD3/GMNN/PSMB9/DNA2/H2BC11/H3C10/PSMB5/CDC7/POLE2/POLA2/MCM7/PSMD7/RFC2/PRIM1/PSME2/PSMB3/PSMA4/PRIM2/MCM3/POLD1/PSMB2/PSMA3/PSMA5/PSMB7/PSMD14/H2BC9/PSME4/RFC3/SEM1/H2BC3/PSMB10/PSMD8/PSMC3/H2AX/RBX1/POLD2/PSMD2/PSMB4/ANAPC10/POLE3
REACTOME_CELL_CYCLE_MITOTIC	REACTOME_CELL_CYCLE_MITOTIC	458	0.60731	2.94715	1e-10	7.58125e-09	6.01645e-09	1763	tags=36%, list=14%, signal=32%	CDC45/CDCA8/MCM10/CDC20/FOXM1/KIF23/CENPE/MYBL2/CCNB2/NDC80/TOP2A/NCAPH/RRM2/UBE2C/SKA1/TPX2/NEK2/CENPM/CENPN/UBE2S/CCNA2/CDK1/ERCC6L/MAD2L1/GINS1/KIF18A/CDT1/BIRC5/NCAPG/AURKB/GINS2/KIF20A/AURKA/CCNB1/MCM5/PTTG1/LMNB1/MCM2/HMMR/KIF2C/CDC25A/CDC6/PLK1/BUB1B/GTSE1/ZWINT/CENPU/SPC25/CENPI/ESPL1/TK1/CCNE1/ORC6/ORC1/PLK4/CKS1B/HAUS6/CCNE2/MCM6/MCM4/FEN1/DBF4/SKP2/RFC4/CDC25B/NCAPD2/TYMS/CENPA/GINS4/H…
REACTOME_G2_M_CHECKPOINTS	REACTOME_G2_M_CHECKPOINTS	134	0.686619	2.90127	1e-10	7.58125e-09	6.01645e-09	1898	tags=49%, list=15%, signal=42%	CDC45/MCM10/CCNB2/CDK1/CHEK1/CCNB1/MCM5/MCM2/CDC25A/CDC6/GTSE1/EXO1/ORC6/ORC1/MCM6/MCM4/DBF4/RFC4/H2BC12/PSMA7/PSMD3/BLM/PSMB9/DNA2/H2BC11/PSMB5/CDC7/MCM7/PSMD7/RFC2/PSME2/SFN/PSMB3/PKMYT1/CDC25C/PSMA4/NSD2/MCM3/UBE2V2/PSMB2/PSMA3/BRIP1/PSMA5/PSMB7/CHEK2/PSMD14/H2BC9/YWHAZ/RMI1/PSME4/RFC3/SEM1/NBN/CLSPN/H2BC3/PSMB10/PSMD8/PSMC3/H2AX/PSMD2/PSMB4/H3-4/PSMC4/BARD1/RPA3
REACTOME_SYNTHESIS_OF_DNA	REACTOME_SYNTHESIS_OF_DNA	110	0.711347	2.90066	1e-10	7.58125e-09	6.01645e-09	1898	tags=54%, list=15%, signal=46%	CDC45/UBE2C/UBE2S/CCNA2/GINS1/CDT1/GINS2/MCM5/MCM2/CDC6/CCNE1/ORC6/ORC1/CCNE2/MCM6/MCM4/FEN1/SKP2/RFC4/GINS4/PCNA/PSMA7/GINS3/PSMD3/GMNN/PSMB9/DNA2/PSMB5/POLE2/POLA2/MCM7/PSMD7/RFC2/PRIM1/PSME2/PSMB3/PSMA4/PRIM2/MCM3/POLD1/PSMB2/PSMA3/PSMA5/PSMB7/PSMD14/PSME4/RFC3/SEM1/PSMB10/PSMD8/PSMC3/RBX1/POLD2/PSMD2/PSMB4/ANAPC10/POLE3/PSMC4/RPA3
REACTOME_MITOTIC_METAPHASE_AND_ANAPHASE	REACTOME_MITOTIC_METAPHASE_AND_ANAPHASE	201	0.650234	2.88716	1e-10	7.58125e-09	6.01645e-09	1850	tags=40%, list=15%, signal=34%	CDCA8/CDC20/CENPE/CCNB2/NDC80/UBE2C/SKA1/CENPM/CENPN/UBE2S/CDK1/ERCC6L/MAD2L1/KIF18A/BIRC5/AURKB/CCNB1/PTTG1/LMNB1/KIF2C/PLK1/BUB1B/ZWINT/CENPU/SPC25/CENPI/ESPL1/CENPA/BUB1/CENPF/PSMA7/NUP93/PSMD3/FBXO5/ZWILCH/PSMB9/PSMB5/TUBA4A/TMPO/PSMD7/LBR/DSN1/KNTC1/PSME2/PSMB3/TUBA4B/RCC1/PSMA4/TUBA1C/NUP155/VRK2/PSMB2/PSMA3/RAD21/PSMA5/PSMB7/PSMD14/PSME4/TUBB3/SEM1/SPDL1/SEC13/NUP205/TUBB4B/PSMB10/PSMD8/TU…
WP_RETINOBLASTOMA_GENE_IN_CANCER	WP_RETINOBLASTOMA_GENE_IN_CANCER	84	0.730152	2.81435	1e-10	7.58125e-09	6.01645e-09	1329	tags=51%, list=11%, signal=46%	CDC45/CCNB2/TOP2A/RRM2/CCNA2/CDK1/CDT1/TTK/CHEK1/CCNB1/KIF4A/CDC25A/CCNE1/ORC1/PLK4/CCNE2/MCM6/MCM4/SKP2/RFC4/CDC25B/TYMS/H2AZ1/MYC/PCNA/E2F1/DHFR/STMN1/CDC7/POLE2/MCM7/HMGB2/PRIM1/E2F3/MSH6/CDK4/MCM3/DCK/TFDP1/FANCG/RFC3/MAPK13/SMC2
REACTOME_S_PHASE	REACTOME_S_PHASE	145	0.655313	2.79876	1e-10	7.58125e-09	6.01645e-09	1763	tags=46%, list=14%, signal=39%	CDC45/UBE2C/UBE2S/CCNA2/GINS1/CDT1/GINS2/MCM5/MCM2/CDC25A/CDC6/CCNE1/ORC6/ORC1/CKS1B/CCNE2/MCM6/MCM4/FEN1/SKP2/RFC4/CDC25B/GINS4/MYC/PCNA/PSMA7/GINS3/PSMD3/GMNN/E2F1/PSMB9/DNA2/PSMB5/POLE2/POLA2/MCM7/PSMD7/RFC2/PRIM1/PSME2/PSMB3/PSMA4/CDK4/PRIM2/MCM3/POLD1/PSMB2/PSMA3/RAD21/PSMA5/PSMB7/TFDP1/PSMD14/E2F5/PSME4/RFC3/SEM1/PSMB10/PSMD8/PSMC3/RBX1/POLD2/PSMD2/PSMB4/ANAPC10/POLE3
REACTOME_MITOTIC_SPINDLE_CHECKPOINT	REACTOME_MITOTIC_SPINDLE_CHECKPOINT	92	0.701549	2.77242	1e-10	7.58125e-09	6.01645e-09	449	tags=27%, list=4%, signal=26%	CDCA8/CDC20/CENPE/NDC80/UBE2C/SKA1/CENPM/CENPN/UBE2S/ERCC6L/MAD2L1/KIF18A/BIRC5/AURKB/KIF2C/PLK1/BUB1B/ZWINT/CENPU/SPC25/CENPI/CENPA/BUB1/CENPF/ZWILCH
REACTOME_DNA_REPLICATION_PRE_INITIATION	REACTOME_DNA_REPLICATION_PRE_INITIATION	111	0.68071	2.75987	1e-10	7.58125e-09	6.01645e-09	1898	tags=46%, list=15%, signal=39%	CDC45/MCM10/UBE2C/UBE2S/CDT1/MCM5/MCM2/CDC6/ORC6/ORC1/MCM6/MCM4/DBF4/H2AZ1/H2BC12/PSMA7/PSMD3/GMNN/PSMB9/H2BC11/H3C10/PSMB5/CDC7/POLE2/POLA2/MCM7/PSMD7/PRIM1/PSME2/PSMB3/PSMA4/PRIM2/MCM3/PSMB2/PSMA3/PSMA5/PSMB7/PSMD14/H2BC9/SEM1/H2BC3/PSMB10/PSMD8/PSMC3/H2AX/PSMD2/PSMB4/ANAPC10/POLE3/PSMC4/RPA3
REACTOME_SEPARATION_OF_SISTER_CHROMATIDS	REACTOME_SEPARATION_OF_SISTER_CHROMATIDS	162	0.642916	2.75629	1e-10	7.58125e-09	6.01645e-09	1762	tags=38%, list=14%, signal=33%	CDCA8/CDC20/CENPE/NDC80/UBE2C/SKA1/CENPM/CENPN/UBE2S/ERCC6L/MAD2L1/KIF18A/BIRC5/AURKB/PTTG1/KIF2C/PLK1/BUB1B/ZWINT/CENPU/SPC25/CENPI/ESPL1/CENPA/BUB1/CENPF/PSMA7/PSMD3/ZWILCH/PSMB9/PSMB5/TUBA4A/PSMD7/DSN1/KNTC1/PSME2/PSMB3/TUBA4B/PSMA4/TUBA1C/PSMB2/PSMA3/RAD21/PSMA5/PSMB7/PSMD14/PSME4/TUBB3/SEM1/SPDL1/SEC13/TUBB4B/PSMB10/PSMD8/TUBA1B/PSMC3/RANGAP1/INCENP/PSMD2/CENPQ/PSMB4/ANAPC10
NABA_CORE_MATRISOME	NABA_CORE_MATRISOME	201	-0.668119	-2.75251	1e-10	7.58125e-09	6.01645e-09	1537	tags=50%, list=12%, signal=44%	MFAP3/IGFBP7/THSD4/VWF/COL18A1/CRELD1/NDNF/CCN4/CCN2/COL2A1/COL15A1/SLIT3/LTBP4/EDIL3/LTBP3/MGP/IGFALS/PXDN/NELL2/LAMB1/SLIT2/VWA5A/COL1A2/PRG4/LUM/EFEMP2/COL1A1/PRELP/NID2/FBLN5/COL21A1/COL6A3/COL8A1/MMRN1/SVEP1/SRPX/SPOCK1/MFAP5/PCOLCE/FBLN1/COL3A1/COL5A3/COL5A2/IGFBP2/IGFBP6/MMRN2/THBS2/CRIM1/EFEMP1/FBLN2/COL7A1/CCN3/GAS6/EMILIN1/HSPG2/VCAN/COL5A1/COL6A2/LAMA2/MXRA5/LAMA3/LTBP2/CRISPLD2/SPARC/…
KEGG_CELL_CYCLE	KEGG_CELL_CYCLE	114	0.66879	2.72918	1e-10	7.58125e-09	6.01645e-09	1230	tags=40%, list=10%, signal=37%	CDC45/CDC20/CCNB2/CCNA2/CDK1/MAD2L1/TTK/CHEK1/CCNB1/MCM5/PTTG1/MCM2/CDC25A/CDC6/PLK1/BUB1B/ESPL1/CCNE1/ORC6/ORC1/CCNE2/MCM6/MCM4/DBF4/SKP2/CDC25B/BUB1/MYC/PCNA/E2F1/CDKN2A/CDC7/MCM7/SFN/HDAC2/E2F3/CDKN2C/PKMYT1/CDC25C/CDK4/MCM3/RAD21/CHEK2/TFDP1/E2F5/YWHAZ
REACTOME_ACTIVATION_OF_THE_PRE_REPLICATIVE_COMPLEX	REACTOME_ACTIVATION_OF_THE_PRE_REPLICATIVE_COMPLEX	31	0.841664	2.68873	1e-10	7.58125e-09	6.01645e-09	995	tags=61%, list=8%, signal=56%	CDC45/MCM10/CDT1/MCM5/MCM2/CDC6/ORC6/ORC1/MCM6/MCM4/DBF4/GMNN/CDC7/POLE2/POLA2/MCM7/PRIM1/PRIM2/MCM3
WP_CELL_CYCLE	WP_CELL_CYCLE	111	0.662525	2.68614	1e-10	7.58125e-09	6.01645e-09	1230	tags=40%, list=10%, signal=36%	CDC45/CDC20/CCNB2/CCNA2/CDK1/TTK/CHEK1/CCNB1/MCM5/PTTG1/MCM2/CDC25A/CDC6/PLK1/ESPL1/CCNE1/ORC6/ORC1/CCNE2/MCM6/MCM4/DBF4/SKP2/CDC25B/BUB1/MYC/PCNA/E2F1/CDKN2A/CDC7/MCM7/SFN/HDAC2/E2F3/CDKN2C/PKMYT1/CDC25C/CDK4/MCM3/RAD21/CHEK2/TFDP1/E2F5/YWHAZ
REACTOME_RESOLUTION_OF_SISTER_CHROMATID_COHESION	REACTOME_RESOLUTION_OF_SISTER_CHROMATID_COHESION	106	0.666435	2.68351	1e-10	7.58125e-09	6.01645e-09	935	tags=29%, list=8%, signal=27%	CDCA8/CDC20/CENPE/CCNB2/NDC80/SKA1/CENPM/CENPN/CDK1/ERCC6L/MAD2L1/KIF18A/BIRC5/AURKB/CCNB1/KIF2C/PLK1/BUB1B/ZWINT/CENPU/SPC25/CENPI/CENPA/BUB1/CENPF/ZWILCH/TUBA4A/DSN1/KNTC1/TUBA4B/TUBA1C
WP_DNA_REPLICATION	WP_DNA_REPLICATION	42	0.791254	2.66937	1e-10	7.58125e-09	6.01645e-09	1000	tags=55%, list=8%, signal=51%	CDC45/MCM10/CDT1/MCM5/MCM2/CDC6/ORC6/ORC1/MCM6/MCM4/DBF4/RFC4/PCNA/GMNN/CDC7/POLE2/POLA2/MCM7/RFC2/PRIM1/PRIM2/MCM3/POLD1
REACTOME_SWITCHING_OF_ORIGINS_TO_A_POST_REPLICATIVE_STATE	REACTOME_SWITCHING_OF_ORIGINS_TO_A_POST_REPLICATIVE_STATE	82	0.695749	2.6671	1e-10	7.58125e-09	6.01645e-09	1844	tags=49%, list=15%, signal=42%	UBE2C/UBE2S/CCNA2/CDT1/MCM5/MCM2/CDC6/CCNE1/ORC6/ORC1/CCNE2/MCM6/MCM4/SKP2/PSMA7/PSMD3/GMNN/PSMB9/PSMB5/MCM7/PSMD7/PSME2/PSMB3/PSMA4/MCM3/PSMB2/PSMA3/PSMA5/PSMB7/PSMD14/PSME4/SEM1/PSMB10/PSMD8/PSMC3/RBX1/PSMD2/PSMB4/ANAPC10/PSMC4
REACTOME_APC_C_MEDIATED_DEGRADATION_OF_CELL_CYCLE_PROTEINS	REACTOME_APC_C_MEDIATED_DEGRADATION_OF_CELL_CYCLE_PROTEINS	79	0.692988	2.65294	1e-10	7.58125e-09	6.01645e-09	1844	tags=47%, list=15%, signal=40%	CDC20/UBE2C/NEK2/UBE2S/CCNA2/CDK1/MAD2L1/AURKB/AURKA/CCNB1/PTTG1/PLK1/BUB1B/SKP2/PSMA7/PSMD3/FBXO5/PSMB9/PSMB5/PSMD7/PSME2/PSMB3/PSMA4/PSMB2/PSMA3/PSMA5/PSMB7/PSMD14/PSME4/SEM1/PSMB10/PSMD8/PSMC3/PSMD2/PSMB4/ANAPC10/PSMC4
REACTOME_G1_S_SPECIFIC_TRANSCRIPTION	REACTOME_G1_S_SPECIFIC_TRANSCRIPTION	26	0.855654	2.62647	1e-10	7.58125e-09	6.01645e-09	495	tags=54%, list=4%, signal=52%	CDC45/RRM2/CDK1/CDT1/CDC25A/CDC6/TK1/CCNE1/ORC1/TYMS/PCNA/FBXO5/E2F1/DHFR
REACTOME_ORC1_REMOVAL_FROM_CHROMATIN	REACTOME_ORC1_REMOVAL_FROM_CHROMATIN	67	0.703888	2.6044	1e-10	7.58125e-09	6.01645e-09	1844	tags=51%, list=15%, signal=43%	CCNA2/CDT1/MCM5/MCM2/CDC6/ORC6/ORC1/MCM6/MCM4/SKP2/PSMA7/PSMD3/PSMB9/PSMB5/MCM7/PSMD7/PSME2/PSMB3/PSMA4/MCM3/PSMB2/PSMA3/PSMA5/PSMB7/PSMD14/PSME4/SEM1/PSMB10/PSMD8/PSMC3/RBX1/PSMD2/PSMB4/PSMC4
PID_PLK1_PATHWAY	PID_PLK1_PATHWAY	43	0.765437	2.58385	1e-10	7.58125e-09	6.01645e-09	437	tags=40%, list=4%, signal=38%	CDC20/CENPE/NDC80/TPX2/CDK1/ERCC6L/PRC1/KIF20A/AURKA/CCNB1/PLK1/BUB1B/CENPU/ECT2/CDC25B/BUB1/FBXO5
REACTOME_M_PHASE	REACTOME_M_PHASE	325	0.548996	2.55736	1e-10	7.58125e-09	6.01645e-09	1850	tags=32%, list=15%, signal=28%	CDCA8/CDC20/KIF23/CENPE/CCNB2/NDC80/NCAPH/UBE2C/SKA1/NEK2/CENPM/CENPN/UBE2S/CDK1/ERCC6L/MAD2L1/KIF18A/BIRC5/NCAPG/AURKB/KIF20A/CCNB1/PTTG1/LMNB1/KIF2C/PLK1/BUB1B/ZWINT/CENPU/SPC25/CENPI/ESPL1/PLK4/HAUS6/NCAPD2/CENPA/H2AZ1/BUB1/CENPF/H2BC12/PSMA7/NUP93/PSMD3/FBXO5/ZWILCH/PSMB9/H2BC11/NCAPG2/H3C10/PSMB5/TUBA4A/TMPO/PSMD7/LBR/DSN1/KNTC1/PSME2/NCAPD3/PSMB3/TUBA4B/SMC4/RCC1/PSMA4/TUBA1C/NUP155/VRK2/PS…
NABA_ECM_GLYCOPROTEINS	NABA_ECM_GLYCOPROTEINS	138	-0.643673	-2.53433	1e-10	7.58125e-09	6.01645e-09	1537	tags=47%, list=12%, signal=42%	MFAP3/IGFBP7/THSD4/VWF/CRELD1/NDNF/CCN4/CCN2/SLIT3/LTBP4/EDIL3/LTBP3/MGP/IGFALS/PXDN/NELL2/LAMB1/SLIT2/VWA5A/EFEMP2/NID2/FBLN5/MMRN1/SVEP1/SRPX/MFAP5/PCOLCE/FBLN1/IGFBP2/IGFBP6/MMRN2/THBS2/CRIM1/EFEMP1/FBLN2/CCN3/GAS6/EMILIN1/LAMA2/MXRA5/LAMA3/LTBP2/CRISPLD2/SPARC/COLQ/SPON1/ECM2/AEBP1/POSTN/DPT/ANOS1/TNN/SNED1/LAMB2/IGFBP4/SPARCL1/FBN1/THBS4/ELN/ADIPOQ/COMP/CILP/CCN5/MATN3/MFAP4
REACTOME_APC_C_CDH1_MEDIATED_DEGRADATION_OF_CDC20_AND_OTHER_APC_C_CDH1_TARGETED_PROTEINS_IN_LATE_MITOSIS_EARLY_G1	REACTOME_APC_C_CDH1_MEDIATED_DEGRADATION_OF_CDC20_AND_OTHER_APC_C_CDH1_TARGETED_PROTEINS_IN_LATE_MITOSIS_EARLY_G1	65	0.685775	2.51852	1e-10	7.58125e-09	6.01645e-09	1844	tags=46%, list=15%, signal=39%	CDC20/UBE2C/UBE2S/AURKB/AURKA/PTTG1/PLK1/SKP2/PSMA7/PSMD3/PSMB9/PSMB5/PSMD7/PSME2/PSMB3/PSMA4/PSMB2/PSMA3/PSMA5/PSMB7/PSMD14/PSME4/SEM1/PSMB10/PSMD8/PSMC3/PSMD2/PSMB4/ANAPC10/PSMC4
REACTOME_RHO_GTPASES_ACTIVATE_FORMINS	REACTOME_RHO_GTPASES_ACTIVATE_FORMINS	119	0.604266	2.4971	1e-10	7.58125e-09	6.01645e-09	935	tags=24%, list=8%, signal=23%	CDCA8/CDC20/CENPE/NDC80/SKA1/CENPM/CENPN/ERCC6L/MAD2L1/KIF18A/BIRC5/AURKB/KIF2C/PLK1/BUB1B/ZWINT/CENPU/SPC25/CENPI/CENPA/BUB1/CENPF/ZWILCH/TUBA4A/DSN1/KNTC1/DIAPH3/TUBA4B/TUBA1C
REACTOME_THE_ROLE_OF_GTSE1_IN_G2_M_PROGRESSION_AFTER_G2_CHECKPOINT	REACTOME_THE_ROLE_OF_GTSE1_IN_G2_M_PROGRESSION_AFTER_G2_CHECKPOINT	71	0.664036	2.49645	1e-10	7.58125e-09	6.01645e-09	2098	tags=49%, list=17%, signal=41%	CCNB2/CDK1/CCNB1/PLK1/GTSE1/PSMA7/PSMD3/PSMB9/PSMB5/TUBA4A/PSMD7/PSME2/PSMB3/TUBA4B/PSMA4/TUBA1C/PSMB2/PSMA3/PSMA5/PSMB7/PSMD14/PSME4/TUBB3/SEM1/TUBB4B/PSMB10/PSMD8/TUBA1B/PSMC3/PSMD2/PSMB4/PSMC4/PSMA2/TUBB1/MAPRE1
REACTOME_MITOTIC_PROMETAPHASE	REACTOME_MITOTIC_PROMETAPHASE	170	0.55918	2.42215	1e-10	7.58125e-09	6.01645e-09	1336	tags=26%, list=11%, signal=24%	CDCA8/CDC20/CENPE/CCNB2/NDC80/NCAPH/SKA1/NEK2/CENPM/CENPN/CDK1/ERCC6L/MAD2L1/KIF18A/BIRC5/NCAPG/AURKB/CCNB1/KIF2C/PLK1/BUB1B/ZWINT/CENPU/SPC25/CENPI/PLK4/HAUS6/NCAPD2/CENPA/BUB1/CENPF/ZWILCH/TUBA4A/DSN1/KNTC1/TUBA4B/SMC4/TUBA1C/RAD21/TUBB/TUBG1/TUBB3/SPDL1/SMC2/SEC13
REACTOME_HOST_INTERACTIONS_OF_HIV_FACTORS	REACTOME_HOST_INTERACTIONS_OF_HIV_FACTORS	122	0.584918	2.41318	1e-10	7.58125e-09	6.01645e-09	3299	tags=57%, list=27%, signal=42%	HMGA1/LCK/PSMA7/NUP93/HCK/PSMD3/PSMB9/CD247/PSMB5/RANBP1/PSMD7/PSME2/PSMB3/SLC25A5/RCC1/PSMA4/DOCK2/NUP155/PSMB2/PSMA3/PSMA5/PSMB7/PSIP1/PSMD14/CD28/PSME4/SEM1/SEC13/NUP205/PSMB10/PSMD8/ELOC/NDC1/BANF1/PSMC3/NUP62/RBX1/RANGAP1/PSMD2/AP1S1/PSMB4/PSMC4/RAN/AP1G1/APOBEC3G/NUP88/NUP85/PSMA2/NUP50/AP2S1/PSMB6/RAE1/NUP42/PSMD12/PSMA1/PSMD10/NUP153/CCNT1/SEH1L/AP1B1/PSMD1/NUP107/NPM1/CD8B/PSMB8/XPO1/NUP…
REACTOME_MITOTIC_G2_G2_M_PHASES	REACTOME_MITOTIC_G2_G2_M_PHASES	175	0.507408	2.21568	1e-10	7.58125e-09	6.01645e-09	1751	tags=30%, list=14%, signal=26%	FOXM1/MYBL2/CCNB2/TPX2/NEK2/CCNA2/CDK1/AURKA/CCNB1/HMMR/CDC25A/PLK1/GTSE1/PLK4/HAUS6/CDC25B/CENPF/PPP2R3B/PSMA7/PSMD3/E2F1/PSMB9/PSMB5/TUBA4A/PSMD7/PSME2/PSMB3/E2F3/TUBA4B/PKMYT1/CDC25C/PSMA4/TUBA1C/BORA/PSMB2/PSMA3/PSMA5/PSMB7/TUBB/PSMD14/TUBG1/PSME4/TUBB3/SEM1/TUBB4B/PSMB10/PHLDA1/PSMD8/TUBA1B/PSMC3/RBX1/PSMD2/PSMB4
REACTOME_RHO_GTPASE_EFFECTORS	REACTOME_RHO_GTPASE_EFFECTORS	244	0.47881	2.19297	1e-10	7.58125e-09	6.01645e-09	1749	tags=25%, list=14%, signal=22%	CDCA8/CDC20/S100A9/CENPE/S100A8/NDC80/SKA1/CENPM/CENPN/ERCC6L/MAD2L1/KIF18A/BIRC5/AURKB/PRC1/KIF14/KIF2C/PLK1/BUB1B/ZWINT/CENPU/SPC25/CENPI/CENPA/H2AZ1/BUB1/CENPF/H2BC12/ZWILCH/H2BC11/H3C10/TUBA4A/CYBA/NCF2/DSN1/KNTC1/DIAPH3/SFN/TUBA4B/CDC25C/TUBA1C/H2BC9/YWHAZ/TUBB3/NCF4/RAC2/NF2/SPDL1/SEC13/TUBB4B/H2BC3/CDH1/TUBA1B/KDM1A/NCK1/ARPC1B/H2AX/RANGAP1/INCENP/ACTR3/CENPQ/WAS
PID_AURORA_B_PATHWAY	PID_AURORA_B_PATHWAY	35	0.790073	2.579	1.0471e-10	7.69774e-09	6.10889e-09	520	tags=43%, list=4%, signal=41%	CDCA8/KIF23/NDC80/NCAPH/BIRC5/NCAPG/AURKB/KIF20A/AURKA/KIF2C/RACGAP1/NCAPD2/CENPA/BUB1/STMN1
REACTOME_ACTIVATION_OF_ATR_IN_RESPONSE_TO_REPLICATION_STRESS	REACTOME_ACTIVATION_OF_ATR_IN_RESPONSE_TO_REPLICATION_STRESS	34	0.793426	2.57173	1.30964e-10	9.34464e-09	7.41586e-09	995	tags=53%, list=8%, signal=49%	CDC45/MCM10/CHEK1/MCM5/MCM2/CDC25A/CDC6/ORC6/ORC1/MCM6/MCM4/DBF4/RFC4/CDC7/MCM7/RFC2/CDC25C/MCM3
REACTOME_HIV_INFECTION	REACTOME_HIV_INFECTION	209	0.463481	2.07696	2.19487e-10	1.52136e-08	1.20734e-08	2771	tags=41%, list=22%, signal=32%	HMGA1/TAF13/FEN1/LCK/PSMA7/NUP93/HCK/PSMD3/PSMB9/CD247/PSMB5/GTF2A1/RANBP1/PSMD7/POLR2F/PSME2/PSMB3/ELOA2/SLC25A5/RCC1/PSMA4/DOCK2/NUP155/CCR5/PSMB2/PSMA3/PSMA5/PSMB7/PSIP1/PSMD14/CD28/TAF2/PSME4/POLR2K/SEM1/SEC13/NUP205/PSMB10/PSMD8/ELOC/NDC1/BANF1/PSMC3/NUP62/RBX1/RANGAP1/SSRP1/PSMD2/CXCR4/NELFCD/AP1S1/PSMB4/POLR2D/PSMC4/RAN/AP1G1/APOBEC3G/VPS37B/NUP88/NUP85/PSMA2/NUP50/TAF11/AP2S1/TAF4B/PSMB6/…
REACTOME_DNA_STRAND_ELONGATION	REACTOME_DNA_STRAND_ELONGATION	31	0.798558	2.55103	9.99906e-10	6.73825e-08	5.34745e-08	1000	tags=65%, list=8%, signal=59%	CDC45/GINS1/GINS2/MCM5/MCM2/MCM6/MCM4/FEN1/RFC4/GINS4/PCNA/GINS3/DNA2/POLA2/MCM7/RFC2/PRIM1/PRIM2/MCM3/POLD1
WP_G1_TO_S_CELL_CYCLE_CONTROL	WP_G1_TO_S_CELL_CYCLE_CONTROL	62	0.664318	2.41387	1.51057e-09	9.90445e-08	7.86013e-08	1107	tags=42%, list=9%, signal=38%	CDC45/CDK1/CCNB1/MCM5/MCM2/CDC25A/CCNE1/ORC6/ORC1/CCNE2/MCM6/MCM4/MYC/PCNA/E2F1/CDKN2A/POLE2/POLA2/MCM7/PRIM1/E2F3/CDKN2C/CDK4/PRIM2/MCM3/TFDP1
REACTOME_G0_AND_EARLY_G1	REACTOME_G0_AND_EARLY_G1	24	0.829708	2.4887	1.69255e-09	1.06328e-07	8.43818e-08	454	tags=46%, list=4%, signal=44%	MYBL2/TOP2A/CCNA2/CDK1/CDC25A/CDC6/CCNE1/CCNE2/MYC/PCNA/E2F1
REACTOME_EXTRACELLULAR_MATRIX_ORGANIZATION	REACTOME_EXTRACELLULAR_MATRIX_ORGANIZATION	265	-0.459745	-1.95921	1.70932e-09	1.06328e-07	8.43818e-08	1914	tags=34%, list=15%, signal=29%	CAPN3/ADAM12/CAPN10/LOXL2/COL4A6/NID1/LAMA4/TNC/COL6A1/KDR/CAST/COL11A1/MFAP3/VWF/ITGAV/COL18A1/COL2A1/COL15A1/MMP3/ITGA3/LTBP4/CD151/LTBP3/PXDN/TGFB2/LAMB1/MMP13/COL1A2/CTSG/LUM/EFEMP2/COL1A1/TMPRSS6/NID2/FBLN5/COL21A1/COL6A3/FGF2/COL8A1/JAM2/MFAP5/PCOLCE/FBLN1/COL3A1/JAM3/COL5A3/MMP10/COL5A2/CTSK/ADAMTS5/EFEMP1/MMP2/FBLN2/ITGB5/P3H3/COL7A1/EMILIN1/HSPG2/VCAN/COL5A1/COL6A2/LAMA2/LOXL1/LAMA3/LTBP…
REACTOME_NUCLEAR_EVENTS_MEDIATED_BY_NFE2L2	REACTOME_NUCLEAR_EVENTS_MEDIATED_BY_NFE2L2	77	0.618305	2.35918	2.6202e-09	1.5183e-07	1.20491e-07	2607	tags=55%, list=21%, signal=43%	ME1/MYC/PSMA7/PSMD3/CDKN2A/PSMB9/GCLM/PSMB5/PGD/TKT/TXNRD1/PSMD7/HMOX1/PSME2/PSMB3/PSMA4/PSMB2/PSMA3/G6PD/PSMA5/PSMB7/PSMD14/PRDX1/SEM1/TALDO1/PSMB10/PSMD8/ATF4/PSMC3/RBX1/PSMD2/PSMB4/PSMC4/SLC7A11/PSMA2/PSMB6/CUL1/PSMD12/PSMA1/IDH1/GSK3B/PSMD10
REACTOME_HOMOLOGY_DIRECTED_REPAIR	REACTOME_HOMOLOGY_DIRECTED_REPAIR	102	0.561709	2.2615	2.54021e-09	1.5183e-07	1.20491e-07	1983	tags=38%, list=16%, signal=32%	RAD51AP1/CCNA2/CHEK1/EXO1/RAD51/FEN1/TIPIN/RFC4/H2BC12/PCNA/BLM/DNA2/H2BC11/POLE2/RFC2/NSD2/POLD1/UBE2V2/BRIP1/ERCC4/H2BC9/RMI1/RFC3/SEM1/TIMELESS/NBN/CLSPN/H2BC3/PARP1/H2AX/PPP4C/POLD2/POLE3/XRCC3/H3-4/BARD1/RPA3/POLQ/BRCA1
WP_NETWORK_MAP_OF_SARSCOV2_SIGNALING_PATHWAY	WP_NETWORK_MAP_OF_SARSCOV2_SIGNALING_PATHWAY	201	0.45949	2.04022	2.62854e-09	1.5183e-07	1.20491e-07	1322	tags=26%, list=11%, signal=23%	CCNB2/CXCL10/RRM2/CXCL13/CXCL9/CDK1/IL1R2/BIRC5/CCNB1/CCL8/CXCL3/CCL20/GTSE1/CXCL8/EIF4EBP1/CCL5/ACE2/MX1/LCK/IFI6/STAT1/CCL2/CD2/CCL4/IFI27/CD3G/CD163/IRAK1/DDIT4/CEBPB/IL7/CD247/APOA2/IFNG/APOC1/CD8A/IFIH1/IFI44L/BID/CCR5/CD3E/OAS2/CCL22/CXCL5/CTSL/CASP5/CXCL1/IL18RAP/DDX58/LBP/PRKCQ/IFIT1
REACTOME_ECM_PROTEOGLYCANS	REACTOME_ECM_PROTEOGLYCANS	74	-0.62697	-2.23937	3.61186e-09	2.03776e-07	1.61716e-07	1861	tags=46%, list=15%, signal=39%	COL4A6/LAMA4/TNC/COL6A1/ITGAV/COL2A1/TGFB2/LAMB1/COL1A2/LUM/COL1A1/COL6A3/COL3A1/COL5A3/COL5A2/ITGB5/HSPG2/VCAN/COL5A1/COL6A2/LAMA2/LAMA3/SPARC/BGN/FMOD/TNN/TGFB3/LAMB2/DCN/COL4A5/ITGA7/COMP/MATN3/ASPN
REACTOME_CYCLIN_A_B1_B2_ASSOCIATED_EVENTS_DURING_G2_M_TRANSITION	REACTOME_CYCLIN_A_B1_B2_ASSOCIATED_EVENTS_DURING_G2_M_TRANSITION	25	0.815346	2.48419	4.1571e-09	2.29207e-07	1.81898e-07	894	tags=44%, list=7%, signal=41%	FOXM1/CCNB2/CCNA2/CDK1/CCNB1/CDC25A/PLK1/CDC25B/PPP2R3B/PKMYT1/CDC25C
WP_GASTRIC_CANCER_NETWORK_1	WP_GASTRIC_CANCER_NETWORK_1	22	0.843323	2.48932	4.84393e-09	2.61142e-07	2.07241e-07	852	tags=55%, list=7%, signal=51%	MYBL2/TOP2A/UBE2C/TPX2/S100P/AURKA/ECT2/KIF15/MCM4/CENPF/KIF20B/RUVBL1
PID_E2F_PATHWAY	PID_E2F_PATHWAY	69	0.613939	2.29133	6.31379e-09	3.32984e-07	2.64254e-07	1151	tags=30%, list=9%, signal=28%	MYBL2/RRM2/CCNA2/CDK1/CDC25A/CDC6/TK1/CCNE1/ORC1/CCNE2/TYMS/MYC/E2F1/CDKN2A/DHFR/RANBP1/E2F3/CDKN2C/MCM3/TFDP1/E2F5
REACTOME_UCH_PROTEINASES	REACTOME_UCH_PROTEINASES	82	0.58549	2.24443	1.0135e-08	5.23138e-07	4.1516e-07	2607	tags=49%, list=21%, signal=39%	UCHL1/PSMA7/PSMD3/PSMB9/PSMB5/PSMD7/ADRM1/PSME2/H2AW/PSMB3/RUVBL1/H2AC17/PSMA4/PSMB2/PSMA3/PSMA5/PSMB7/PSMD14/PSME4/SEM1/UCHL5/ACTL6A/PSMB10/PSMD8/PSMC3/PSMD2/PSMB4/PSMC4/BARD1/PSMA2/H2AC4/HCFC1/PSMB6/FOXK2/UCHL3/H2AC14/PSMD12/PSMA1/INO80B/PSMD10
REACTOME_ANTIGEN_PROCESSING_CROSS_PRESENTATION	REACTOME_ANTIGEN_PROCESSING_CROSS_PRESENTATION	100	0.549475	2.21951	1.35821e-08	6.86036e-07	5.44435e-07	2771	tags=53%, list=22%, signal=41%	S100A9/S100A8/CTSV/TAP1/PSMA7/PSMD3/PSMB9/PSMB5/CYBA/CTSS/PSMD7/NCF2/SEC61G/PSME2/PSMB3/SEC61A2/PSMA4/TLR1/PSMB2/PSMA3/PSMA5/PSMB7/CTSL/PSMD14/PSME4/MRC1/NCF4/SEM1/TAP2/PSMB10/PSMD8/CD14/PSMC3/SEC61B/TLR2/PSMD2/PSMB4/PSMC4/CYBB/HLA-G/PSMA2/CD207/PSMB6/HLA-F/SEC61A1/CHUK/PSMD12/PSMA1/PSMD10/TLR6/CALR/PDIA3/PSMD1
REACTOME_CHROMOSOME_MAINTENANCE	REACTOME_CHROMOSOME_MAINTENANCE	101	0.546541	2.20522	1.38565e-08	6.86036e-07	5.44435e-07	2220	tags=40%, list=18%, signal=33%	HJURP/CENPM/CENPN/CCNA2/CENPU/DSCC1/CENPI/OIP5/FEN1/RFC4/CENPA/H2AZ1/H2BC12/PCNA/BLM/DNA2/H2BC11/POLA2/POLR2F/RFC2/PRIM1/RUVBL1/PRIM2/POLD1/H2BC9/RFC3/POLR2K/MIS18A/H2BC3/H2AX/POLD2/CENPQ/POLR2D/GAR1/H3-4/RPA3/MIS18BP1/NOP10/CENPO/H2AC4
REACTOME_KEAP1_NFE2L2_PATHWAY	REACTOME_KEAP1_NFE2L2_PATHWAY	95	0.560027	2.23482	1.65343e-08	8.02244e-07	6.36657e-07	2607	tags=49%, list=21%, signal=39%	ME1/SKP2/MYC/PSMA7/PSMD3/CDKN2A/PSMB9/GCLM/PSMB5/PGD/TKT/TXNRD1/PSMD7/HMOX1/PSME2/PSMB3/PSMA4/PSMB2/PSMA3/G6PD/PSMA5/PSMB7/PSMD14/UFD1/PRDX1/PSME4/SEM1/TALDO1/PSMB10/PSMD8/ATF4/PSMC3/RBX1/PSMD2/PSMB4/VCP/PSMC4/SLC7A11/PSMA2/CSNK2B/PSMB6/CUL1/PSMD12/PSMA1/IDH1/GSK3B/PSMD10
REACTOME_REGULATION_OF_RUNX3_EXPRESSION_AND_ACTIVITY	REACTOME_REGULATION_OF_RUNX3_EXPRESSION_AND_ACTIVITY	54	0.666312	2.38452	1.8266e-08	8.68887e-07	6.89545e-07	3126	tags=59%, list=25%, signal=44%	PSMA7/PSMD3/CDKN2A/PSMB9/PSMB5/RUNX3/PSMD7/PSME2/PSMB3/PSMA4/PSMB2/PSMA3/PSMA5/PSMB7/PSMD14/SEM1/CBFB/PSMB10/PSMD8/PSMC3/PSMD2/PSMB4/PSMC4/PSMA2/PSMB6/PSMD12/PSMA1/PSMD10/PSMD1/SMURF2/SRC/PSMB8
REACTOME_G1_S_DNA_DAMAGE_CHECKPOINTS	REACTOME_G1_S_DNA_DAMAGE_CHECKPOINTS	63	0.625618	2.27813	2.37033e-08	1.10585e-06	8.77598e-07	1844	tags=44%, list=15%, signal=38%	CCNA2/CHEK1/CDC25A/CCNE1/CCNE2/PSMA7/PSMD3/CDKN2A/PSMB9/PSMB5/PSMD7/PSME2/PSMB3/PSMA4/PSMB2/PSMA3/PSMA5/PSMB7/CHEK2/PSMD14/PSME4/SEM1/PSMB10/PSMD8/PSMC3/PSMD2/PSMB4/PSMC4
NABA_PROTEOGLYCANS	NABA_PROTEOGLYCANS	30	-0.768888	-2.36187	3.44846e-08	1.57848e-06	1.25268e-06	985	tags=50%, list=8%, signal=46%	PRG4/LUM/PRELP/SPOCK1/HSPG2/VCAN/BGN/FMOD/DCN/PODNL1/KERA/OMD/CHAD/ASPN/OGN
WP_OVERVIEW_OF_PROINFLAMMATORY_AND_PROFIBROTIC_MEDIATORS	WP_OVERVIEW_OF_PROINFLAMMATORY_AND_PROFIBROTIC_MEDIATORS	102	0.537062	2.16227	3.72721e-08	1.67449e-06	1.32886e-06	1673	tags=34%, list=14%, signal=30%	MMP1/CXCL10/CXCL13/CXCL11/CXCL9/CCL18/CCL8/CXCL3/CCL20/MMP9/CXCL8/CCL5/CCL2/CCL4/IL24/IL7/CCL7/IFNG/CCL17/CCL22/XCL1/CXCL5/IL15/CXCL1/SPP1/CCL16/VEGFA/EBI3/IFNW1/CCL13/IFNA21/TNF/IL19/IL6/LTA
REACTOME_METABOLISM_OF_POLYAMINES	REACTOME_METABOLISM_OF_POLYAMINES	55	0.650664	2.33989	3.84388e-08	1.6955e-06	1.34554e-06	2607	tags=60%, list=21%, signal=48%	AMD1/PSMA7/PSMD3/PSMB9/PSMB5/PSMD7/ODC1/PSME2/PSMB3/PSMA4/PSMB2/PSMA3/PSMA5/PSMB7/SMS/PSMD14/PSME4/SEM1/PSMB10/PSMD8/PSMC3/SRM/PSMD2/PSMB4/PSMC4/SMOX/PSMA2/PSMB6/SAT1/AGMAT/PSMD12/PSMA1/PSMD10
KEGG_PROTEASOME	KEGG_PROTEASOME	41	0.704859	2.36836	4.41695e-08	1.89714e-06	1.50556e-06	2503	tags=66%, list=20%, signal=53%	PSMA7/PSMD3/PSMB9/PSMB5/IFNG/PSMD7/PSME2/PSMB3/PSMA4/PSMB2/PSMA3/PSMA5/PSMB7/PSMD14/PSME4/SEM1/PSMB10/PSMD8/PSMC3/PSMD2/PSMB4/PSMC4/PSMA2/PSMB6/PSMD12/POMP/PSMA1
REACTOME_NEGATIVE_REGULATION_OF_NOTCH4_SIGNALING	REACTOME_NEGATIVE_REGULATION_OF_NOTCH4_SIGNALING	53	0.65208	2.3189	4.45743e-08	1.89714e-06	1.50556e-06	2771	tags=57%, list=22%, signal=44%	TACC3/PSMA7/PSMD3/PSMB9/PSMB5/PSMD7/PSME2/PSMB3/PSMA4/PSMB2/PSMA3/PSMA5/PSMB7/PSMD14/YWHAZ/SEM1/PSMB10/PSMD8/PSMC3/RBX1/PSMD2/PSMB4/PSMC4/PSMA2/PSMB6/CUL1/PSMD12/PSMA1/PSMD10/PSMD1
REACTOME_SCF_BETA_TRCP_MEDIATED_DEGRADATION_OF_EMI1	REACTOME_SCF_BETA_TRCP_MEDIATED_DEGRADATION_OF_EMI1	52	0.659685	2.34215	4.63582e-08	1.93905e-06	1.53882e-06	2607	tags=56%, list=21%, signal=44%	CDC20/PSMA7/PSMD3/FBXO5/PSMB9/PSMB5/PSMD7/PSME2/PSMB3/PSMA4/PSMB2/PSMA3/PSMA5/PSMB7/PSMD14/PSME4/SEM1/PSMB10/PSMD8/PSMC3/PSMD2/PSMB4/PSMC4/PSMA2/PSMB6/CUL1/PSMD12/PSMA1/PSMD10
PID_ATR_PATHWAY	PID_ATR_PATHWAY	36	0.728363	2.38583	4.92726e-08	1.9596e-06	1.55513e-06	1421	tags=47%, list=11%, signal=42%	CCNA2/CHEK1/MCM2/CDC25A/CDC6/PLK1/RAD51/TIPIN/RFC4/MCM7/RFC2/CDC25C/YWHAZ/RFC3/TIMELESS/NBN/CLSPN
REACTOME_CYCLIN_A_CDK2_ASSOCIATED_EVENTS_AT_S_PHASE_ENTRY	REACTOME_CYCLIN_A_CDK2_ASSOCIATED_EVENTS_AT_S_PHASE_ENTRY	80	0.584123	2.24065	4.79889e-08	1.9596e-06	1.55513e-06	1844	tags=40%, list=15%, signal=34%	CCNA2/CDC25A/CCNE1/CKS1B/CCNE2/SKP2/CDC25B/MYC/PSMA7/PSMD3/E2F1/PSMB9/PSMB5/PSMD7/PSME2/PSMB3/PSMA4/CDK4/PSMB2/PSMA3/PSMA5/PSMB7/TFDP1/PSMD14/E2F5/SEM1/PSMB10/PSMD8/PSMC3/PSMD2/PSMB4/PSMC4
REACTOME_DNA_REPAIR	REACTOME_DNA_REPAIR	265	0.394261	1.80749	4.87238e-08	1.9596e-06	1.55513e-06	2628	tags=34%, list=21%, signal=27%	RAD51AP1/CCNA2/CHEK1/DTL/FANCI/EXO1/ISG15/RAD51/PCLAF/FANCA/FEN1/TIPIN/RFC4/KPNA2/H2AZ1/H2BC12/PCNA/BLM/NEIL3/DNA2/H2BC11/FANCE/POLE2/POLR2F/MSH2/RFC2/RUVBL1/EYA4/NSD2/MSH6/USP1/POLD1/UBE2V2/EYA3/BRIP1/CHEK2/UNG/ERCC4/UFD1/H2BC9/RMI1/FANCG/RFC3/POLR2K/EYA1/SEM1/TIMELESS/NBN/USP10/ACTL6A/CLSPN/H2BC3/PARP1/UBE2L6/H2AX/PPP4C/RBX1/POLD2/POLR2D/POLE3/XRCC3/H3-4/VCP/PPP5C/BARD1/RPA3/POLQ/BRCA1/COPS5/TD…
REACTOME_POLO_LIKE_KINASE_MEDIATED_EVENTS	REACTOME_POLO_LIKE_KINASE_MEDIATED_EVENTS	13	0.901522	2.30951	5.2029e-08	2.03584e-06	1.61564e-06	894	tags=69%, list=7%, signal=64%	FOXM1/MYBL2/CCNB2/CCNB1/CDC25A/PLK1/CENPF/PKMYT1/CDC25C
REACTOME_TCR_SIGNALING	REACTOME_TCR_SIGNALING	109	0.519523	2.11569	5.3873e-08	2.07454e-06	1.64635e-06	2503	tags=48%, list=20%, signal=38%	TRAT1/LCK/HLA-DRB4/RIPK2/FYB1/PSMA7/CD3G/PSMD3/PSMB9/CD247/CD3D/PSMB5/PSMD7/PLCG2/ITK/PSME2/PSMB3/PSMA4/PTPRC/CD3E/PSMB2/PSMA3/LCP2/PSMA5/PSMB7/PSMD14/PSME4/SEM1/PRKCQ/CSK/PSMB10/PSMD8/PTPN22/NCK1/PSMC3/PSMD2/WAS/PSMB4/HLA-DQB1/PSMC4/PTPRJ/PSMA2/GRAP2/PSMB6/NFKBIA/UBE2D1/CDC34/CUL1/UBE2N/CHUK/PSMD12/PSMA1
WP_DNA_IRDAMAGE_AND_CELLULAR_RESPONSE_VIA_ATR	WP_DNA_IRDAMAGE_AND_CELLULAR_RESPONSE_VIA_ATR	77	0.591144	2.25554	5.80039e-08	2.1656e-06	1.71861e-06	1622	tags=34%, list=13%, signal=30%	CDC45/FOXM1/CDK1/CHEK1/MCM2/PLK1/FANCI/EXO1/RAD51/FANCA/FEN1/PCNA/RECQL4/E2F1/RFWD3/MSH2/CDC25C/USP1/BRIP1/CHEK2/RMI1/SEM1/NBN/CLSPN/PARP1/H2AX
REACTOME_DNA_DOUBLE_STRAND_BREAK_REPAIR	REACTOME_DNA_DOUBLE_STRAND_BREAK_REPAIR	131	0.497746	2.09645	5.80231e-08	2.1656e-06	1.71861e-06	1983	tags=34%, list=16%, signal=29%	RAD51AP1/CCNA2/CHEK1/EXO1/RAD51/FEN1/TIPIN/RFC4/KPNA2/H2BC12/PCNA/BLM/DNA2/H2BC11/POLE2/RFC2/EYA4/NSD2/POLD1/UBE2V2/EYA3/BRIP1/CHEK2/ERCC4/H2BC9/RMI1/RFC3/EYA1/SEM1/TIMELESS/NBN/CLSPN/H2BC3/PARP1/H2AX/PPP4C/POLD2/POLE3/XRCC3/H3-4/PPP5C/BARD1/RPA3/POLQ/BRCA1
REACTOME_TNFR2_NON_CANONICAL_NF_KB_PATHWAY	REACTOME_TNFR2_NON_CANONICAL_NF_KB_PATHWAY	92	0.548734	2.16852	6.54732e-08	2.40664e-06	1.9099e-06	2607	tags=47%, list=21%, signal=37%	TNFRSF11A/PSMA7/PSMD3/BIRC3/PSMB9/LTB/PSMB5/TNFRSF17/CD40LG/PSMD7/PSME2/PSMB3/PSMA4/PSMB2/PSMA3/PSMA5/PSMB7/PSMD14/PSME4/CD27/SEM1/PSMB10/PSMD8/PSMC3/TNF/LTA/PSMD2/LTBR/PSMB4/PSMC4/TRAF2/RELB/TNFRSF4/FASLG/PSMA2/TNFRSF1B/CD40/PSMB6/CUL1/CHUK/PSMD12/PSMA1/PSMD10
REACTOME_AUF1_HNRNP_D0_BINDS_AND_DESTABILIZES_MRNA	REACTOME_AUF1_HNRNP_D0_BINDS_AND_DESTABILIZES_MRNA	50	0.661206	2.29427	7.35889e-08	2.66458e-06	2.1146e-06	2771	tags=58%, list=22%, signal=45%	PSMA7/PSMD3/PSMB9/PSMB5/PSMD7/PSME2/PSMB3/PSMA4/PSMB2/PSMA3/PSMA5/PSMB7/PSMD14/PSME4/SEM1/PSMB10/PSMD8/PSMC3/PSMD2/PSMB4/PSMC4/EIF4G1/PSMA2/PABPC1/PSMB6/PSMD12/PSMA1/PSMD10/PSMD1
REACTOME_KINESINS	REACTOME_KINESINS	44	0.673851	2.28299	9.45399e-08	3.37285e-06	2.67668e-06	1493	tags=41%, list=12%, signal=36%	KIF23/CENPE/KIF18A/KIF11/KIFC1/KIF18B/KIF20A/KIF4A/KIF2C/RACGAP1/KIF15/TUBA4A/KIF20B/TUBA4B/TUBA1C/TUBB3/TUBB4B/TUBA1B
REACTOME_APC_CDC20_MEDIATED_DEGRADATION_OF_NEK2A	REACTOME_APC_CDC20_MEDIATED_DEGRADATION_OF_NEK2A	20	0.825545	2.3786	9.87945e-08	3.47356e-06	2.7566e-06	147	tags=30%, list=1%, signal=30%	CDC20/UBE2C/NEK2/UBE2S/MAD2L1/BUB1B
WP_METABOLIC_REPROGRAMMING_IN_COLON_CANCER	WP_METABOLIC_REPROGRAMMING_IN_COLON_CANCER	41	0.695687	2.33754	1.15991e-07	4.0199e-06	3.19018e-06	1744	tags=63%, list=14%, signal=55%	PSAT1/SHMT2/HK3/GPI/PGD/TKT/TIGAR/PPAT/PSPH/IDH2/GAPDH/PGK1/PAICS/ENO1/G6PD/PGAM1/SLC16A3/SLC2A1/PYCR1/SLC1A5/TALDO1/ACO2/PKM/IDH3A/PDHA1/RPIA
PID_FOXM1_PATHWAY	PID_FOXM1_PATHWAY	39	0.706381	2.35751	1.3886e-07	4.74471e-06	3.76538e-06	482	tags=44%, list=4%, signal=42%	FOXM1/CCNB2/NEK2/CCNA2/CDK1/BIRC5/AURKB/CCNB1/PLK1/CCNE1/CKS1B/SKP2/CDC25B/CENPA/MYC/CENPF/CDKN2A
REACTOME_NEUTROPHIL_DEGRANULATION	REACTOME_NEUTROPHIL_DEGRANULATION	410	0.353779	1.69951	1.82799e-07	6.1593e-06	4.888e-06	2157	tags=27%, list=17%, signal=23%	S100A9/S100A8/S100A7/CAMP/S100P/CALML5/HPSE/MMP9/ORM1/LYZ/GGH/CRISP3/LCN2/CTSC/PRDX4/PADI2/SELL/MS4A3/PRSS2/PKP1/PSMD3/BIN2/HK3/SLPI/SERPINB3/ILF2/PNP/PRSS3/GPI/CYBA/CTSS/AOC1/LAIR1/PTGES2/PSMD7/GSTP1/OLFM4/DSN1/SLC2A3/PLAC8/CD300A/LPCAT1/FABP5/SYNGR1/VNN1/APRT/CHI3L1/S100A12/ELANE/CCT2/LILRB2/DOCK2/CD53/ITGB2/PTPRC/ADGRE5/ATP11A/PSMA5/FCER1G/PSMB7/PGAM1/KCNAB2/PTX3/TUBB/CEACAM8/PSMD14/CXCL1/FCN1…
REACTOME_PROCESSING_OF_DNA_DOUBLE_STRAND_BREAK_ENDS	REACTOME_PROCESSING_OF_DNA_DOUBLE_STRAND_BREAK_ENDS	69	0.579493	2.16277	1.91451e-07	6.36246e-06	5.04922e-06	1983	tags=38%, list=16%, signal=32%	CCNA2/CHEK1/EXO1/TIPIN/RFC4/H2BC12/BLM/DNA2/H2BC11/RFC2/NSD2/UBE2V2/BRIP1/H2BC9/RMI1/RFC3/TIMELESS/NBN/CLSPN/H2BC3/H2AX/PPP4C/H3-4/BARD1/RPA3/BRCA1
REACTOME_UNWINDING_OF_DNA	REACTOME_UNWINDING_OF_DNA	11	0.920317	2.22594	2.5106e-07	8.23071e-06	6.53186e-06	995	tags=100%, list=8%, signal=92%	CDC45/GINS1/GINS2/MCM5/MCM2/MCM6/MCM4/GINS4/GINS3/MCM7/MCM3
REACTOME_SCF_SKP2_MEDIATED_DEGRADATION_OF_P27_P21	REACTOME_SCF_SKP2_MEDIATED_DEGRADATION_OF_P27_P21	59	0.611418	2.19113	2.82897e-07	9.15077e-06	7.26202e-06	2607	tags=54%, list=21%, signal=43%	CCNA2/CCNE1/CKS1B/CCNE2/SKP2/PSMA7/PSMD3/PSMB9/PSMB5/PSMD7/PSME2/PSMB3/PSMA4/CDK4/PSMB2/PSMA3/PSMA5/PSMB7/PSMD14/SEM1/PSMB10/PSMD8/PSMC3/PSMD2/PSMB4/PSMC4/PSMA2/PSMB6/CUL1/PSMD12/PSMA1/PSMD10
REACTOME_DEFECTIVE_CFTR_CAUSES_CYSTIC_FIBROSIS	REACTOME_DEFECTIVE_CFTR_CAUSES_CYSTIC_FIBROSIS	55	0.628798	2.26126	2.91455e-07	9.30356e-06	7.38326e-06	2771	tags=55%, list=22%, signal=43%	PSMA7/PSMD3/PSMB9/PSMB5/PSMD7/DERL1/PSME2/PSMB3/PSMA4/PSMB2/PSMA3/PSMA5/PSMB7/PSMD14/PSME4/SEM1/PSMB10/PSMD8/PSMC3/PSMD2/PSMB4/VCP/PSMC4/CFTR/PSMA2/PSMB6/PSMD12/PSMA1/PSMD10/PSMD1
REACTOME_NUCLEAR_ENVELOPE_NE_REASSEMBLY	REACTOME_NUCLEAR_ENVELOPE_NE_REASSEMBLY	65	0.600215	2.2043	3.36617e-07	1.06056e-05	8.41658e-06	2079	tags=40%, list=17%, signal=33%	CCNB2/CDK1/CCNB1/LMNB1/NUP93/TUBA4A/TMPO/LBR/TUBA4B/RCC1/TUBA1C/NUP155/VRK2/TUBB3/SEC13/NUP205/TUBB4B/TUBA1B/VRK1/NDC1/BANF1/NUP62/RANGAP1/RAN/NUP85/TUBB1
KEGG_DNA_REPLICATION	KEGG_DNA_REPLICATION	33	0.72168	2.35154	3.69218e-07	1.14836e-05	9.11335e-06	1898	tags=64%, list=15%, signal=54%	MCM5/MCM2/MCM6/MCM4/FEN1/RFC4/PCNA/RNASEH2A/DNA2/POLE2/POLA2/MCM7/RFC2/PRIM1/PRIM2/MCM3/POLD1/RFC3/POLD2/POLE3/RPA3
REACTOME_DECTIN_1_MEDIATED_NONCANONICAL_NF_KB_SIGNALING	REACTOME_DECTIN_1_MEDIATED_NONCANONICAL_NF_KB_SIGNALING	59	0.607564	2.17732	3.99226e-07	1.22598e-05	9.72929e-06	2607	tags=53%, list=21%, signal=42%	PSMA7/PSMD3/PSMB9/PSMB5/PSMD7/PSME2/PSMB3/PSMA4/CCL17/PSMB2/PSMA3/CCL22/PSMA5/PSMB7/PSMD14/PSME4/SEM1/PSMB10/PSMD8/PSMC3/PSMD2/PSMB4/PSMC4/RELB/PSMA2/PSMB6/CUL1/CHUK/PSMD12/PSMA1/PSMD10
REACTOME_ELASTIC_FIBRE_FORMATION	REACTOME_ELASTIC_FIBRE_FORMATION	40	-0.691344	-2.22571	4.15525e-07	1.26008e-05	9.99994e-06	1537	tags=50%, list=12%, signal=44%	MFAP3/ITGAV/LTBP4/LTBP3/TGFB2/EFEMP2/FBLN5/MFAP5/FBLN1/EFEMP1/FBLN2/ITGB5/EMILIN1/LOXL1/LTBP2/TGFB3/FBN1/ELN/BMP4/MFAP4
REACTOME_CROSS_PRESENTATION_OF_SOLUBLE_EXOGENOUS_ANTIGENS_ENDOSOMES	REACTOME_CROSS_PRESENTATION_OF_SOLUBLE_EXOGENOUS_ANTIGENS_ENDOSOMES	46	0.649846	2.23362	4.37335e-07	1.30985e-05	1.03949e-05	2771	tags=63%, list=22%, signal=49%	PSMA7/PSMD3/PSMB9/PSMB5/PSMD7/PSME2/PSMB3/PSMA4/PSMB2/PSMA3/PSMA5/PSMB7/PSMD14/PSME4/MRC1/SEM1/PSMB10/PSMD8/PSMC3/PSMD2/PSMB4/PSMC4/PSMA2/CD207/PSMB6/PSMD12/PSMA1/PSMD10/PSMD1
REACTOME_MOLECULES_ASSOCIATED_WITH_ELASTIC_FIBRES	REACTOME_MOLECULES_ASSOCIATED_WITH_ELASTIC_FIBRES	35	-0.715241	-2.26774	5.16514e-07	1.52812e-05	1.21271e-05	1537	tags=54%, list=12%, signal=48%	MFAP3/ITGAV/LTBP4/LTBP3/TGFB2/EFEMP2/FBLN5/MFAP5/FBLN1/EFEMP1/FBLN2/ITGB5/EMILIN1/LTBP2/TGFB3/FBN1/ELN/BMP4/MFAP4
PID_AVB3_INTEGRIN_PATHWAY	PID_AVB3_INTEGRIN_PATHWAY	72	-0.59098	-2.10768	5.62368e-07	1.64374e-05	1.30447e-05	1872	tags=43%, list=15%, signal=37%	PIK3R1/COL4A6/COL6A1/KDR/COL11A1/CDKN1B/ITGAV/COL2A1/COL15A1/EDIL3/ADGRA2/COL1A2/TGFBR2/COL1A1/COL6A3/FGF2/COL8A1/COL3A1/COL5A2/COL7A1/IGF1R/COL5A1/COL6A2/COL8A2/COL10A1/IRS1/COL4A5/VAV3/COL14A1/COL16A1/COL17A1
WP_PROTEASOME_DEGRADATION	WP_PROTEASOME_DEGRADATION	61	0.595133	2.14804	6.5114e-07	1.88056e-05	1.4924e-05	2607	tags=56%, list=21%, signal=44%	UCHL1/H2AZ1/PSMA7/PSMD3/PSMB9/PSMB5/IFNG/PSMD7/PSME2/PSMB3/PSMA4/PSMB2/PSMA3/PSMA5/PSMB7/RPN2/RPN1/PSMB10/PSMD8/PSMC3/H2AX/PSMD2/PSMB4/PSMC4/HLA-G/PSMA2/H2AC4/PSMB6/UBE2D1/HLA-F/UCHL3/PSMD12/PSMA1/PSMD10
PID_AURORA_A_PATHWAY	PID_AURORA_A_PATHWAY	30	0.728692	2.31827	6.74621e-07	1.92545e-05	1.52803e-05	342	tags=27%, list=3%, signal=26%	DLGAP5/TPX2/TACC3/BIRC5/AURKB/AURKA/CDC25B/CENPA
REACTOME_CELLULAR_RESPONSE_TO_HYPOXIA	REACTOME_CELLULAR_RESPONSE_TO_HYPOXIA	69	0.561588	2.09594	8.25996e-07	2.31452e-05	1.83679e-05	2607	tags=48%, list=21%, signal=38%	CA9/PSMA7/PSMD3/PSMB9/PSMB5/PSMD7/PSME2/PSMB3/PSMA4/PSMB2/PSMA3/PSMA5/PSMB7/VHL/PSMD14/PSME4/SEM1/VEGFA/PSMB10/PSMD8/ELOC/PSMC3/RBX1/PSMD2/PSMB4/HIF1A/PSMC4/PSMA2/PSMB6/UBE2D1/PSMD12/PSMA1/PSMD10
REACTOME_TRANSCRIPTIONAL_REGULATION_BY_TP53	REACTOME_TRANSCRIPTIONAL_REGULATION_BY_TP53	304	0.370843	1.71729	8.30021e-07	2.31452e-05	1.83679e-05	2530	tags=28%, list=20%, signal=23%	E2F8/TPX2/CCNA2/CDK1/BIRC5/AURKB/CHEK1/AURKA/CCNB1/FANCI/EXO1/CCNE1/TAF13/CCNE2/RFC4/PRDM1/PCNA/NDRG1/BLM/E2F1/CDKN2A/DNA2/DDIT4/GPI/TIGAR/TXNRD1/COX5A/POLR2F/MSH2/RFC2/SFN/HDAC2/CYCS/ELOA2/CDC25C/PRELID3A/SCO2/BID/BRIP1/G6PD/CHEK2/TFDP1/TXN/GATAD2A/RRAGD/PRDX1/TAF2/YWHAZ/RMI1/RFC3/POLR2K/NBN/CDK12/PRMT1/POU4F1/CDK5/BCL2L14/ELOC/TP53BP2/SSRP1/NELFCD/POLR2D/CASP10/COX7B/BARD1/RPA3/BRCA1/CENPJ/CASP…
REACTOME_G2_M_DNA_DAMAGE_CHECKPOINT	REACTOME_G2_M_DNA_DAMAGE_CHECKPOINT	65	0.588651	2.16183	8.57682e-07	2.36447e-05	1.87643e-05	1983	tags=42%, list=16%, signal=35%	CDK1/CHEK1/CCNB1/EXO1/RFC4/H2BC12/BLM/DNA2/H2BC11/RFC2/SFN/CDC25C/NSD2/UBE2V2/BRIP1/CHEK2/H2BC9/YWHAZ/RMI1/RFC3/NBN/H2BC3/H2AX/H3-4/BARD1/RPA3/BRCA1
WP_SARSCOV2_INNATE_IMMUNITY_EVASION_AND_CELLSPECIFIC_IMMUNE_RESPONSE	WP_SARSCOV2_INNATE_IMMUNITY_EVASION_AND_CELLSPECIFIC_IMMUNE_RESPONSE	63	0.583627	2.12522	9.29639e-07	2.53405e-05	2.01101e-05	1954	tags=38%, list=16%, signal=32%	CXCL10/CXCL13/CXCL11/CXCL9/LAG3/CXCL3/CXCL8/CCL5/ACE2/MX1/STAT1/CCL2/CCL4/HDAC2/CXCL5/CXCL1/DDX58/IFIT2/TNF/DHX58/IL6/FADD/TRAF2/AP1G1
REACTOME_MITOTIC_PROPHASE	REACTOME_MITOTIC_PROPHASE	96	0.515592	2.05823	1.00575e-06	2.71105e-05	2.15148e-05	2741	tags=43%, list=22%, signal=33%	CCNB2/CDK1/CCNB1/LMNB1/PLK1/H2AZ1/H2BC12/NUP93/H2BC11/NCAPG2/H3C10/TMPO/NCAPD3/SMC4/NUP155/VRK2/LPIN1/H2BC9/SMC2/SEC13/NUP205/H2BC3/VRK1/NDC1/BANF1/H2AX/NUP62/H3-4/NUP88/NUP85/NUP50/H2AC4/MAPK1/RAE1/NUP42/PRKCA/H2AC14/MCPH1/NUP153/NCAPH2/SEH1L
REACTOME_E2F_MEDIATED_REGULATION_OF_DNA_REPLICATION	REACTOME_E2F_MEDIATED_REGULATION_OF_DNA_REPLICATION	21	0.778632	2.25247	1.52604e-06	4.04868e-05	3.21301e-05	1107	tags=48%, list=9%, signal=43%	CDK1/CCNB1/ORC6/ORC1/PPP2R3B/E2F1/POLA2/PRIM1/PRIM2/TFDP1
REACTOME_DEGRADATION_OF_AXIN	REACTOME_DEGRADATION_OF_AXIN	51	0.617144	2.16969	1.53536e-06	4.04868e-05	3.21301e-05	2922	tags=55%, list=24%, signal=42%	PSMA7/PSMD3/PSMB9/PSMB5/PSMD7/PSME2/PSMB3/PSMA4/PSMB2/PSMA3/PSMA5/PSMB7/PSMD14/PSME4/SEM1/PSMB10/PSMD8/PSMC3/PSMD2/PSMB4/PSMC4/PSMA2/PSMB6/PSMD12/PSMA1/PSMD10/PSMD1/SMURF2
REACTOME_GLYCOLYSIS	REACTOME_GLYCOLYSIS	68	0.563121	2.09429	1.80495e-06	4.70841e-05	3.73657e-05	3299	tags=53%, list=27%, signal=39%	PFKP/NUP93/HK3/GAPDHS/GPI/TPI1/GAPDH/PGK1/NUP155/ENO1/PGAM1/PFKFB2/SEC13/PFKFB4/NUP205/PKM/NDC1/NUP62/HK2/NUP88/NUP85/NUP50/RAE1/PRKACB/NUP42/PGK2/NUP153/SEH1L/ENO3/PFKL/GCKR/PRKACG/NUP107/PFKFB3/NUP37/NUP58
REACTOME_REGULATION_OF_RAS_BY_GAPS	REACTOME_REGULATION_OF_RAS_BY_GAPS	58	0.594714	2.13502	2.16266e-06	5.58149e-05	4.42945e-05	2607	tags=52%, list=21%, signal=41%	RASAL1/PSMA7/PSMD3/PSMB9/PSMB5/PSMD7/PSME2/PSMB3/PSMA4/PSMB2/PSMA3/PSMA5/PSMB7/PSMD14/PSME4/SEM1/PSMB10/PSMD8/PSMC3/RBX1/PSMD2/PSMB4/PSMC4/RASAL2/PSMA2/PSMB6/NRAS/PSMD12/PSMA1/PSMD10
REACTOME_MHC_CLASS_II_ANTIGEN_PRESENTATION	REACTOME_MHC_CLASS_II_ANTIGEN_PRESENTATION	105	0.496436	2.00625	2.21778e-06	5.66352e-05	4.49454e-05	1493	tags=25%, list=12%, signal=22%	KIF23/CENPE/KIF18A/KIF11/KIF20A/LAG3/KIF4A/KIF2C/RACGAP1/SPTBN2/CTSV/KIF15/CTSC/HLA-DRB4/HLA-DOB/IFI30/TUBA4A/CTSS/LGMN/TUBA4B/TUBA1C/CTSL/TUBB3/SEC13/TUBB4B/TUBA1B
NABA_COLLAGENS	NABA_COLLAGENS	33	-0.711852	-2.22232	2.45762e-06	6.14659e-05	4.87791e-05	1861	tags=70%, list=15%, signal=59%	COL4A6/COL6A1/COL11A1/COL18A1/COL2A1/COL15A1/COL1A2/COL1A1/COL21A1/COL6A3/COL8A1/COL3A1/COL5A3/COL5A2/COL7A1/COL5A1/COL6A2/COL8A2/COL10A1/COL4A5/COL14A1/COL16A1/COL17A1
REACTOME_COLLAGEN_CHAIN_TRIMERIZATION	REACTOME_COLLAGEN_CHAIN_TRIMERIZATION	33	-0.711852	-2.22232	2.45762e-06	6.14659e-05	4.87791e-05	1861	tags=70%, list=15%, signal=59%	COL4A6/COL6A1/COL11A1/COL18A1/COL2A1/COL15A1/COL1A2/COL1A1/COL21A1/COL6A3/COL8A1/COL3A1/COL5A3/COL5A2/COL7A1/COL5A1/COL6A2/COL8A2/COL10A1/COL4A5/COL14A1/COL16A1/COL17A1
REACTOME_SUMOYLATION_OF_DNA_REPLICATION_PROTEINS	REACTOME_SUMOYLATION_OF_DNA_REPLICATION_PROTEINS	44	0.63077	2.13703	2.71042e-06	6.70967e-05	5.32477e-05	2741	tags=50%, list=22%, signal=39%	CDCA8/TOP2A/BIRC5/AURKB/AURKA/PCNA/NUP93/NUP155/SEC13/NUP205/NDC1/NUP62/RANGAP1/INCENP/NUP88/NUP85/NUP50/RAE1/NUP42/NUP153/TOP1/SEH1L
REACTOME_STABILIZATION_OF_P53	REACTOME_STABILIZATION_OF_P53	53	0.602069	2.14105	2.81329e-06	6.89399e-05	5.47104e-05	2771	tags=55%, list=22%, signal=43%	PSMA7/PSMD3/CDKN2A/PSMB9/PSMB5/PSMD7/PSME2/PSMB3/PSMA4/PSMB2/PSMA3/PSMA5/PSMB7/CHEK2/PSMD14/PSME4/SEM1/PSMB10/PSMD8/PSMC3/PSMD2/PSMB4/PSMC4/PSMA2/PSMB6/PSMD12/PSMA1/PSMD10/PSMD1
REACTOME_COPI_DEPENDENT_GOLGI_TO_ER_RETROGRADE_TRAFFIC	REACTOME_COPI_DEPENDENT_GOLGI_TO_ER_RETROGRADE_TRAFFIC	78	0.538873	2.06236	2.9125e-06	7.06573e-05	5.60733e-05	935	tags=19%, list=8%, signal=18%	KIF23/CENPE/KIF18A/KIF11/KIFC1/KIF18B/KIF20A/KIF4A/KIF2C/RACGAP1/KIF15/TUBA4A/KIF20B/TUBA4B/TUBA1C
REACTOME_APC_C_CDC20_MEDIATED_DEGRADATION_OF_CYCLIN_B	REACTOME_APC_C_CDC20_MEDIATED_DEGRADATION_OF_CYCLIN_B	18	0.808028	2.24796	3.30608e-06	7.94115e-05	6.30206e-05	102	tags=28%, list=1%, signal=28%	CDC20/UBE2C/UBE2S/CDK1/CCNB1
WP_REGULATION_OF_SISTER_CHROMATID_SEPARATION_AT_THE_METAPHASEANAPHASE_TRANSITION	WP_REGULATION_OF_SISTER_CHROMATID_SEPARATION_AT_THE_METAPHASEANAPHASE_TRANSITION	14	0.841739	2.20105	3.37636e-06	8.03043e-05	6.37292e-05	360	tags=50%, list=3%, signal=49%	CDC20/CENPE/MAD2L1/PTTG1/BUB1B/ESPL1/BUB1
KEGG_FOCAL_ADHESION	KEGG_FOCAL_ADHESION	192	-0.439409	-1.79341	4.08778e-06	9.62811e-05	7.64083e-05	2153	tags=29%, list=17%, signal=24%	MAPK3/PGF/VEGFC/CTNNB1/MYL5/TLN2/THBS3/PIK3R1/COL4A6/PIP5K1C/LAMA4/TNC/HGF/COL6A1/ARHGAP5/KDR/COL11A1/VWF/BCL2/ITGAV/COL2A1/ITGA3/CCND1/FLNC/LAMB1/DOCK1/COL1A2/COL1A1/COL6A3/MYL9/PARVA/COL3A1/COL5A3/COL5A2/FLNB/THBS2/SHC2/PDGFC/ITGB5/IGF1R/PDGFRB/CAV1/COL5A1/COL6A2/LAMA2/LAMA3/TNN/LAMB2/ITGA7/THBS4/IGF1/VAV3/PDGFD/COMP/CHAD
PID_MYC_ACTIV_PATHWAY	PID_MYC_ACTIV_PATHWAY	73	0.541955	2.03894	4.68271e-06	0.000109233	8.6687e-05	1414	tags=30%, list=11%, signal=27%	BIRC5/CCNB1/CDC25A/FOSL1/MMP9/HMGA1/TK1/TFRC/MYC/NME1/ODC1/BCAT1/E2F3/RUVBL1/HSPD1/RCC1/CDK4/GAPDH/ENO1/SLC2A1/NBN/ACTL6A
REACTOME_DEGRADATION_OF_GLI1_BY_THE_PROTEASOME	REACTOME_DEGRADATION_OF_GLI1_BY_THE_PROTEASOME	56	0.595002	2.15193	5.26803e-06	0.000120568	9.56826e-05	2771	tags=55%, list=22%, signal=43%	PSMA7/PSMD3/PSMB9/PSMB5/PSMD7/PSME2/PSMB3/PSMA4/PSMB2/PSMA3/PSMA5/PSMB7/PSMD14/PSME4/SEM1/PSMB10/PSMD8/PSMC3/RBX1/PSMD2/ITCH/PSMB4/PSMC4/PSMA2/PSMB6/PRKACB/CUL1/PSMD12/PSMA1/PSMD10/PSMD1
WP_IL18_SIGNALING_PATHWAY	WP_IL18_SIGNALING_PATHWAY	250	0.370784	1.70581	5.24562e-06	0.000120568	9.56826e-05	1774	tags=27%, list=14%, signal=24%	MMP1/CCNB2/CCNA2/CCL18/CXCL3/PLA2G7/CCL20/MMP9/CXCL8/CCL5/LCK/IL2RA/TNIP3/CCL2/CCL4/LMNB2/BIRC3/IRAK1/CEBPB/LTB/STMN1/CLDN4/CDK5R2/IFNG/HMOX1/APBA2/HDGF/NCF2/KCNH2/CYCS/ULBP2/ACTA1/PTPN7/TNFAIP2/BID/ENO1/ATF3/BIN1/ICAM1/TBX21/AARS1/PTX3/IRF1/SPP1/IL18RAP/SNTB1/ITM2C/S1PR4/TMEM165/TNFAIP3/CD83/DEK/VEGFA/PYGB/UGGT1/MYH6/ELAVL1/PARP1/CLDN1/NFKBIE/TNF/TOMM40/RANGAP1/IL6/FADD/PTGS2/PLOD3/RGS16
WP_TYPE_II_INTERFERON_SIGNALING	WP_TYPE_II_INTERFERON_SIGNALING	36	0.667267	2.18571	5.44708e-06	0.000121567	9.64754e-05	2442	tags=56%, list=20%, signal=45%	CXCL10/CXCL9/GBP1/TAP1/ISG15/IFI6/STAT1/PSMB9/OAS1/IFNG/ICAM1/IRF8/IRF1/IFIT2/CYBB/SOCS3/EIF2AK2/REG1A/IRF9/SOCS1
REACTOME_LAMININ_INTERACTIONS	REACTOME_LAMININ_INTERACTIONS	30	-0.704971	-2.16553	5.51213e-06	0.000121567	9.64754e-05	1861	tags=50%, list=15%, signal=43%	COL4A6/NID1/LAMA4/ITGAV/COL18A1/ITGA3/LAMB1/NID2/COL7A1/HSPG2/LAMA2/LAMA3/LAMB2/COL4A5/ITGA7
REACTOME_DISEASES_OF_PROGRAMMED_CELL_DEATH	REACTOME_DISEASES_OF_PROGRAMMED_CELL_DEATH	61	0.566937	2.04627	5.37405e-06	0.000121567	9.64754e-05	2320	tags=43%, list=19%, signal=35%	EZH2/LMNB1/CDC25A/CDC25B/H2AZ1/H2BC12/CDKN2A/H2BC11/H3C10/POLA2/DNMT3B/PRIM1/CDC25C/PRIM2/H2BC9/PRDX1/H2BC3/CDK5/DNMT3A/DNMT1/H2AX/FADD/TRAF2/FASLG/H2AC4/BCL2L11
REACTOME_DEUBIQUITINATION	REACTOME_DEUBIQUITINATION	229	0.370331	1.6807	5.51205e-06	0.000121567	9.64754e-05	2607	tags=33%, list=21%, signal=26%	CDC20/CCNA2/CDK1/CDC25A/USP18/SKP2/TNIP3/UCHL1/MYC/RIPK2/H2BC12/PSMA7/PSMD3/BIRC3/PSMB9/H2BC11/PSMB5/PSMD7/IFIH1/ADRM1/PSME2/H2AW/PSMB3/OTUB2/RUVBL1/H2AC17/PSMA4/PSMB2/PSMA3/VCPIP1/PSMA5/PSMB7/PSMD14/UFD1/DDX58/H2BC9/ARRB2/PSME4/SEM1/TNFAIP3/UCHL5/JOSD1/USP10/ACTL6A/CLSPN/H2BC3/PSMB10/PSMD8/PSMC3/PTRH2/PSMD2/PSMB4/HIF1A/VCP/PSMC4/TRAF2/BARD1/BRCA1/CFTR/PSMA2/H2AC4/HCFC1/PSMB6/FOXK2/NFKBIA/UBE2D1/…
REACTOME_INTERLEUKIN_10_SIGNALING	REACTOME_INTERLEUKIN_10_SIGNALING	43	0.632183	2.13403	6.20065e-06	0.000135521	0.000107549	2557	tags=53%, list=21%, signal=43%	CXCL10/IL1R2/CCL20/CXCL8/CCL5/CCR1/CCL2/CCL4/CD86/CCR5/ICAM1/CCL22/CXCL1/TNF/IL6/FCER2/PTGS2/TNFRSF1B/PTAFR/IL10RA/IL12B/CCR2/IL12A
REACTOME_REGULATION_OF_MRNA_STABILITY_BY_PROTEINS_THAT_BIND_AU_RICH_ELEMENTS	REACTOME_REGULATION_OF_MRNA_STABILITY_BY_PROTEINS_THAT_BIND_AU_RICH_ELEMENTS	79	0.532173	2.0373	6.31921e-06	0.000135667	0.000107665	2802	tags=47%, list=23%, signal=36%	PSMA7/PSMD3/PSMB9/PSMB5/PSMD7/EXOSC4/PSME2/PSMB3/PSMA4/PSMB2/PSMA3/PSMA5/PSMB7/PSMD14/YWHAZ/PSME4/SEM1/PSMB10/PSMD8/ELAVL1/EXOSC9/PSMC3/PSMD2/PSMB4/PSMC4/EXOSC2/EXOSC5/EIF4G1/PSMA2/PABPC1/PSMB6/PRKCA/PSMD12/PSMA1/PSMD10/PSMD1/MAPK14
REACTOME_CELLULAR_RESPONSE_TO_CHEMICAL_STRESS	REACTOME_CELLULAR_RESPONSE_TO_CHEMICAL_STRESS	168	0.410223	1.77879	6.28302e-06	0.000135667	0.000107665	2771	tags=40%, list=22%, signal=32%	ME1/SKP2/MYC/PSMA7/PSMD3/CDKN2A/PSMB9/GCLM/PSMB5/CYBA/PGD/TKT/TXNRD1/PSMD7/GSTP1/HMOX1/NCF2/COX5A/PSME2/PSMB3/CYCS/ERO1A/PSMA4/SCO2/PSMB2/PSMA3/G6PD/PSMA5/PSMB7/TXN/PSMD14/UFD1/PRDX1/PSME4/NCF4/SEM1/TALDO1/PSMB10/PSMD8/ATF4/PSMC3/RBX1/PSMD2/PSMB4/ABCC1/VCP/PSMC4/MED1/COX7B/CYBB/SLC7A11/PSMA2/CSNK2B/P4HB/PSMB6/PRDX6/COX8A/CUL1/COX5B/PSMD12/PSMA1/IDH1/GSK3B/PSMD10/TACO1/ATOX1/NDUFA4/PSMD1
PID_INTEGRIN1_PATHWAY	PID_INTEGRIN1_PATHWAY	63	-0.58279	-2.04116	7.06677e-06	0.000150386	0.000119346	1861	tags=44%, list=15%, signal=38%	COL4A6/NID1/LAMA4/TNC/COL6A1/COL11A1/ITGAV/COL18A1/COL2A1/ITGA3/LAMB1/COL1A2/COL1A1/COL6A3/JAM2/COL3A1/COL5A2/THBS2/COL7A1/COL5A1/COL6A2/LAMA2/LAMA3/F13A1/LAMB2/FBN1/COL4A5/ITGA7
REACTOME_SIGNALING_BY_NOTCH	REACTOME_SIGNALING_BY_NOTCH	178	0.405887	1.77724	8.16513e-06	0.000172249	0.000136696	2503	tags=33%, list=20%, signal=27%	DLGAP5/TACC3/GZMB/FABP7/STAT1/H2AZ1/MYC/H2BC12/PSMA7/PSMD3/E2F1/PSMB9/H2BC11/H3C10/YBX1/PSMB5/PSMD7/PSME2/PSMB3/HDAC2/E2F3/PSMA4/PSMB2/PSMA3/PSMA5/PSMB7/TFDP1/PSMD14/TLE1/H2BC9/ARRB2/YWHAZ/CDK8/SEM1/H2BC3/PSMB10/PSMD8/ST3GAL4/PSMC3/H2AX/RBX1/PSMD2/ITCH/FCER2/PSMB4/HIF1A/PSMC4/EGFR/MDK/PSMA2/EGF/H2AC4/PSMB6/HDAC9/CUL1/H2AC14/PSMD12/TMED2/PSMA1
WP_GASTRIC_CANCER_NETWORK_2	WP_GASTRIC_CANCER_NETWORK_2	24	0.720766	2.16193	9.34891e-06	0.000195521	0.000155165	1266	tags=58%, list=10%, signal=52%	TOP2A/UBE2C/FANCI/DSCC1/RFC4/ATAD2/MYC/COL9A3/LMNB2/LBR/PLAC8/BRIX1/CD48/RFC3
REACTOME_CHEMOKINE_RECEPTORS_BIND_CHEMOKINES	REACTOME_CHEMOKINE_RECEPTORS_BIND_CHEMOKINES	52	0.591742	2.10093	9.48953e-06	0.000196766	0.000156152	1409	tags=46%, list=11%, signal=41%	CXCL10/CXCL13/CXCL11/CXCL9/CXCL3/CCL20/CXCL8/CCL5/CXCR6/CCR1/CCL2/CCL4/CCR8/CCR7/CCL7/CCL17/CCR5/CCL22/XCL1/CXCL5/CXCL1/CCL16/CCRL2/CCL13
REACTOME_INHIBITION_OF_THE_PROTEOLYTIC_ACTIVITY_OF_APC_C_REQUIRED_FOR_THE_ONSET_OF_ANAPHASE_BY_MITOTIC_SPINDLE_CHECKPOINT_COMPONENTS	REACTOME_INHIBITION_OF_THE_PROTEOLYTIC_ACTIVITY_OF_APC_C_REQUIRED_FOR_THE_ONSET_OF_ANAPHASE_BY_MITOTIC_SPINDLE_CHECKPOINT_COMPONENTS	15	0.814746	2.16246	1.08316e-05	0.000222691	0.000176726	147	tags=33%, list=1%, signal=33%	CDC20/UBE2C/UBE2S/MAD2L1/BUB1B
REACTOME_DEGRADATION_OF_DVL	REACTOME_DEGRADATION_OF_DVL	54	0.579776	2.07484	1.14763e-05	0.000233962	0.000185671	2771	tags=52%, list=22%, signal=40%	PSMA7/PSMD3/PSMB9/PSMB5/PSMD7/PSME2/PSMB3/PSMA4/PSMB2/PSMA3/PSMA5/PSMB7/PSMD14/PSME4/SEM1/PSMB10/PSMD8/PSMC3/RBX1/PSMD2/PSMB4/PSMC4/PSMA2/PSMB6/PSMD12/PSMA1/PSMD10/PSMD1
REACTOME_FCERI_MEDIATED_NF_KB_ACTIVATION	REACTOME_FCERI_MEDIATED_NF_KB_ACTIVATION	77	0.528337	2.0159	1.17389e-05	0.000237321	0.000188337	2607	tags=51%, list=21%, signal=40%	IGLV1-44/IGHV3-48/PSMA7/PSMD3/PSMB9/IGLV6-57/LYN/PSMB5/PSMD7/PSME2/PSMB3/PSMA4/PSMB2/PSMA3/PSMA5/FCER1G/PSMB7/PSMD14/PSME4/SEM1/PRKCQ/PSMB10/PSMD8/PSMC3/PSMD2/PSMB4/PSMC4/RASGRP1/PSMA2/PSMB6/NFKBIA/UBE2D1/CDC34/CUL1/UBE2N/CHUK/PSMD12/PSMA1/PSMD10
BIOCARTA_CTL_PATHWAY	BIOCARTA_CTL_PATHWAY	13	0.827042	2.11871	1.21708e-05	0.00024402	0.000193653	1023	tags=62%, list=8%, signal=57%	GZMB/PRF1/CD3G/CD247/CD3D/ITGB2/CD3E/ICAM1
REACTOME_SIGNALING_BY_THE_B_CELL_RECEPTOR_BCR	REACTOME_SIGNALING_BY_THE_B_CELL_RECEPTOR_BCR	106	0.461275	1.8574	1.36675e-05	0.000271781	0.000215685	2503	tags=42%, list=20%, signal=34%	IGLV1-44/IGHV3-48/IGHM/PSMA7/PSMD3/PSMB9/IGLV6-57/LYN/PSMB5/IGHD/PSMD7/PLCG2/PSME2/CD79B/PSMB3/PSMA4/PSMB2/PSMA3/PSMA5/PSMB7/PSMD14/NFKBIB/PSME4/SEM1/PSMB10/CD19/PSMD8/NCK1/SYK/PSMC3/NFKBIE/PSMD2/PSMB4/PSMC4/RASGRP1/PSMA2/FKBP1A/SOS1/PSMB6/NFKBIA/NRAS/CUL1/CHUK/PSMD12/PSMA1
REACTOME_INITIATION_OF_NUCLEAR_ENVELOPE_NE_REFORMATION	REACTOME_INITIATION_OF_NUCLEAR_ENVELOPE_NE_REFORMATION	18	0.7819	2.17526	1.50735e-05	0.000297303	0.000235938	1570	tags=50%, list=13%, signal=44%	CCNB2/CDK1/CCNB1/LMNB1/TMPO/LBR/VRK2/VRK1/BANF1
WP_INTEGRATED_CANCER_PATHWAY	WP_INTEGRATED_CANCER_PATHWAY	43	0.615289	2.077	1.62971e-05	0.000318845	0.000253034	1075	tags=33%, list=9%, signal=30%	MMP1/CDK1/CHEK1/CDC25A/PLK1/STAT1/CDC25B/MYC/BLM/E2F1/MSH2/MSH6/CDK4/CHEK2
BIOCARTA_MCM_PATHWAY	BIOCARTA_MCM_PATHWAY	18	0.77659	2.16049	1.93078e-05	0.000374726	0.000297381	995	tags=61%, list=8%, signal=56%	CDT1/MCM5/MCM2/CDC6/CCNE1/ORC6/ORC1/MCM6/MCM4/MCM7/MCM3
BIOCARTA_TCYTOTOXIC_PATHWAY	BIOCARTA_TCYTOTOXIC_PATHWAY	12	0.83227	2.06064	2.12907e-05	0.000400397	0.000317753	1171	tags=83%, list=9%, signal=76%	CD2/CD3G/CD247/CD3D/CD8A/ITGB2/PTPRC/CD3E/ICAM1/CD28
REACTOME_GOLGI_TO_ER_RETROGRADE_TRANSPORT	REACTOME_GOLGI_TO_ER_RETROGRADE_TRANSPORT	108	0.458259	1.86332	2.11236e-05	0.000400397	0.000317753	935	tags=14%, list=8%, signal=13%	KIF23/CENPE/KIF18A/KIF11/KIFC1/KIF18B/KIF20A/KIF4A/KIF2C/RACGAP1/KIF15/TUBA4A/KIF20B/TUBA4B/TUBA1C
WP_FOCAL_ADHESION_PI3KAKTMTORSIGNALING_PATHWAY	WP_FOCAL_ADHESION_PI3KAKTMTORSIGNALING_PATHWAY	280	-0.39148	-1.66874	2.12773e-05	0.000400397	0.000317753	1965	tags=26%, list=16%, signal=22%	FGF7/THBS3/CAB39/IRS2/PRKAA2/PIK3R1/STK11/COL4A6/TEK/LAMA4/TNC/HGF/KDR/COL11A1/CDKN1B/CREB3L1/INSR/CHRM2/EIF4B/VWF/ITGAV/EPAS1/EFNA1/F2R/COL2A1/NGFR/ITGA3/FGFR3/TSC1/FGF1/NGF/FGF14/LAMB1/LPAR1/FOXO1/COL1A2/COL1A1/CAB39L/LPAR4/EPOR/FGF2/COL3A1/COL5A3/COL5A2/GNG12/PRLR/THBS2/LPAR6/PDGFC/ITGB5/KITLG/SREBF1/IGF1R/PDGFRB/LIPE/COL5A1/COL6A2/LAMA2/GHR/LAMA3/FGF18/IKBKB/GNG11/TNN/LAMB2/IRS1/ITGA7/THBS4/I…
REACTOME_SIGNALING_BY_INTERLEUKINS	REACTOME_SIGNALING_BY_INTERLEUKINS	414	0.318862	1.52984	2.12798e-05	0.000400397	0.000317753	2607	tags=32%, list=21%, signal=26%	MMP1/CXCL10/IL1R2/BIRC5/LMNB1/CCL20/IL12RB2/MMP9/USP18/CXCL8/CCL5/LCN2/LCK/SNRPA1/IL2RA/CCR1/STAT1/CCL2/MYC/RIPK2/IL2RG/CCL4/PSMA7/HCK/PSMD3/IL24/IRAK1/PSMB9/RALA/IL7/IL7R/H3C10/LYN/VCAM1/PSMB5/IFNG/PSMD7/HMOX1/PSME2/IL21R/CD86/PSMB3/CSF2RB/S100A12/PTPN7/CBL/PSMA4/IL32/ITGB2/CCR5/ICAM1/PSMB2/IL27RA/PSMA3/CCL22/PSMA5/PSMB7/IL15/PSMD14/CXCL1/IL18RAP/MTAP/LBP/FSCN1/YWHAZ/NFKBIB/PSME4/LCP1/S100B/SEM1…
REACTOME_NUCLEAR_ENVELOPE_BREAKDOWN	REACTOME_NUCLEAR_ENVELOPE_BREAKDOWN	47	0.601601	2.06968	2.27174e-05	0.000423941	0.000336438	2375	tags=47%, list=19%, signal=38%	CCNB2/CDK1/CCNB1/LMNB1/PLK1/NUP93/TMPO/NUP155/VRK2/LPIN1/SEC13/NUP205/VRK1/NDC1/BANF1/NUP62/NUP88/NUP85/NUP50/RAE1/NUP42/PRKCA
REACTOME_HDR_THROUGH_HOMOLOGOUS_RECOMBINATION_HRR	REACTOME_HDR_THROUGH_HOMOLOGOUS_RECOMBINATION_HRR	56	0.57179	2.06798	2.63076e-05	0.000487193	0.000386634	2507	tags=46%, list=20%, signal=37%	RAD51AP1/CHEK1/EXO1/RAD51/RFC4/PCNA/BLM/DNA2/POLE2/RFC2/POLD1/BRIP1/RMI1/RFC3/SEM1/NBN/POLD2/POLE3/XRCC3/BARD1/RPA3/BRCA1/BRCA2/RAD1/RAD51C/RFC5
BIOCARTA_CTLA4_PATHWAY	BIOCARTA_CTLA4_PATHWAY	19	0.755455	2.13806	2.73469e-05	0.000502602	0.000398863	1171	tags=58%, list=9%, signal=52%	ICOS/CTLA4/LCK/HLA-DRB4/CD3G/CD247/CD3D/ITK/CD86/CD3E/CD28
REACTOME_PROGRAMMED_CELL_DEATH	REACTOME_PROGRAMMED_CELL_DEATH	191	0.388927	1.72531	2.9404e-05	0.000536347	0.000425642	2503	tags=35%, list=20%, signal=28%	GZMB/LMNB1/PSMA7/PKP1/PSMD3/E2F1/BIRC3/CDKN2A/PSMB9/STK26/H1-1/PSMB5/PSMD7/HMGB2/H1-2/PSME2/SFN/PSMB3/CYCS/BAK1/H1-4/ELANE/PSMA4/BID/H1-5/PSMB2/PSMA3/PSMA5/PSMB7/TFDP1/IRF1/CASP5/PSMD14/DNM1L/YWHAZ/PSME4/SEM1/PRKCQ/CLSPN/CDH1/PSMB10/PSMD8/CD14/TP53BP2/PSMC3/PSMD2/FADD/PSMB4/PSMC4/H1-3/DSG3/TRAF2/TJP2/CASP1/AVEN/FASLG/PSMA2/MAGED1/MAPK1/PSMB6/BCL2L11/DAPK1/PELI1/PMAIP1/BCAP31/PSMD12/PSMA1
REACTOME_NON_INTEGRIN_MEMBRANE_ECM_INTERACTIONS	REACTOME_NON_INTEGRIN_MEMBRANE_ECM_INTERACTIONS	56	-0.586883	-1.99374	3.02389e-05	0.000539409	0.000428073	2504	tags=45%, list=20%, signal=36%	THBS1/LAMC1/SDC4/DDR2/COL4A6/LAMA4/TNC/COL11A1/ITGAV/COL2A1/LAMB1/COL1A2/COL1A1/FGF2/COL3A1/COL5A3/COL5A2/ITGB5/HSPG2/COL5A1/LAMA2/LAMA3/LAMB2/COL10A1/COL4A5
REACTOME_REGULATION_OF_PTEN_STABILITY_AND_ACTIVITY	REACTOME_REGULATION_OF_PTEN_STABILITY_AND_ACTIVITY	65	0.536697	1.97103	3.02268e-05	0.000539409	0.000428073	2771	tags=46%, list=22%, signal=36%	PSMA7/PSMD3/PSMB9/PSMB5/PSMD7/PSME2/PSMB3/PSMA4/PSMB2/PSMA3/PSMA5/PSMB7/PSMD14/PSME4/SEM1/PSMB10/PSMD8/PSMC3/PSMD2/PSMB4/PSMC4/PSMA2/CSNK2B/PSMB6/PSMD12/FRK/PSMA1/PSMD10/USP13/PSMD1
REACTOME_APOPTOSIS	REACTOME_APOPTOSIS	167	0.400504	1.73441	2.99205e-05	0.000539409	0.000428073	2503	tags=37%, list=20%, signal=30%	GZMB/LMNB1/PSMA7/PKP1/PSMD3/E2F1/CDKN2A/PSMB9/STK26/H1-1/PSMB5/PSMD7/HMGB2/H1-2/PSME2/SFN/PSMB3/CYCS/BAK1/H1-4/PSMA4/BID/H1-5/PSMB2/PSMA3/PSMA5/PSMB7/TFDP1/PSMD14/DNM1L/YWHAZ/PSME4/SEM1/PRKCQ/CLSPN/CDH1/PSMB10/PSMD8/CD14/TP53BP2/PSMC3/PSMD2/FADD/PSMB4/PSMC4/H1-3/DSG3/TRAF2/TJP2/AVEN/FASLG/PSMA2/MAGED1/MAPK1/PSMB6/BCL2L11/DAPK1/PMAIP1/BCAP31/PSMD12/PSMA1
REACTOME_DEPOSITION_OF_NEW_CENPA_CONTAINING_NUCLEOSOMES_AT_THE_CENTROMERE	REACTOME_DEPOSITION_OF_NEW_CENPA_CONTAINING_NUCLEOSOMES_AT_THE_CENTROMERE	40	0.627514	2.10886	3.1078e-05	0.00055033	0.000436739	2220	tags=48%, list=18%, signal=39%	HJURP/CENPM/CENPN/CENPU/CENPI/OIP5/CENPA/H2AZ1/H2BC12/H2BC11/RUVBL1/H2BC9/MIS18A/H2BC3/H2AX/CENPQ/MIS18BP1/CENPO/H2AC4
WP_COHESIN_COMPLEX_CORNELIA_DE_LANGE_SYNDROME	WP_COHESIN_COMPLEX_CORNELIA_DE_LANGE_SYNDROME	27	0.679354	2.09838	3.65897e-05	0.000643237	0.00051047	193	tags=19%, list=2%, signal=18%	CDK1/AURKB/PTTG1/PLK1/ESPL1
REACTOME_CD22_MEDIATED_BCR_REGULATION	REACTOME_CD22_MEDIATED_BCR_REGULATION	10	0.869338	2.04914	3.73722e-05	0.000652266	0.000517635	803	tags=70%, list=6%, signal=66%	IGLV1-44/IGHV3-48/IGHM/IGLV6-57/LYN/IGHD/CD79B
REACTOME_COLLAGEN_BIOSYNTHESIS_AND_MODIFYING_ENZYMES	REACTOME_COLLAGEN_BIOSYNTHESIS_AND_MODIFYING_ENZYMES	53	-0.592264	-1.99682	3.94937e-05	0.00068437	0.000543113	1861	tags=47%, list=15%, signal=40%	COL4A6/COL6A1/COL11A1/COL18A1/COL2A1/COL15A1/COL1A2/COL1A1/COL21A1/COL6A3/COL8A1/PCOLCE/COL3A1/COL5A3/COL5A2/P3H3/COL7A1/COL5A1/COL6A2/COL8A2/COL10A1/COL4A5/COL14A1/COL16A1/COL17A1
REACTOME_GOLGI_CISTERNAE_PERICENTRIOLAR_STACK_REORGANIZATION	REACTOME_GOLGI_CISTERNAE_PERICENTRIOLAR_STACK_REORGANIZATION	14	0.80476	2.10435	4.14005e-05	0.000712324	0.000565297	137	tags=29%, list=1%, signal=28%	CCNB2/CDK1/CCNB1/PLK1
PID_IL12_2PATHWAY	PID_IL12_2PATHWAY	60	0.541427	1.94909	4.2923e-05	0.000733319	0.000581959	1169	tags=30%, list=9%, signal=27%	GZMB/IL12RB2/LCK/IL2RA/STAT1/GZMA/RIPK2/IL2RG/CCL4/CD3G/CD247/CD3D/IFNG/CD8A/CCR5/CD3E/TBX21/IL18RAP
REACTOME_TRANSCRIPTION_OF_E2F_TARGETS_UNDER_NEGATIVE_CONTROL_BY_DREAM_COMPLEX	REACTOME_TRANSCRIPTION_OF_E2F_TARGETS_UNDER_NEGATIVE_CONTROL_BY_DREAM_COMPLEX	16	0.784718	2.10375	4.35179e-05	0.000738283	0.000585898	1151	tags=50%, list=9%, signal=45%	TOP2A/CDC25A/CDC6/MYC/PCNA/E2F1/TFDP1/E2F5
REACTOME_INTEGRIN_CELL_SURFACE_INTERACTIONS	REACTOME_INTEGRIN_CELL_SURFACE_INTERACTIONS	80	-0.513027	-1.85271	5.06946e-05	0.000852196	0.000676299	1861	tags=39%, list=15%, signal=33%	COL4A6/TNC/COL6A1/KDR/VWF/ITGAV/COL18A1/COL2A1/ITGA3/COL1A2/LUM/COL1A1/COL6A3/COL8A1/JAM2/COL3A1/JAM3/COL5A3/COL5A2/ITGB5/COL7A1/HSPG2/COL5A1/COL6A2/COL8A2/COL10A1/FBN1/COL4A5/ITGA7/COL16A1/COMP
REACTOME_CELLULAR_SENESCENCE	REACTOME_CELLULAR_SENESCENCE	146	0.411007	1.7557	5.09351e-05	0.000852196	0.000676299	1859	tags=25%, list=15%, signal=21%	UBE2C/UBE2S/CCNA2/EZH2/LMNB1/CXCL8/HMGA1/CCNE1/CCNE2/H2AZ1/H2BC12/E2F1/CDKN2A/CEBPB/H2BC11/H3C10/H1-1/H1-2/E2F3/CDKN2C/CBX2/H1-4/CDK4/HIRA/H1-5/TFDP1/TXN/H2BC9/NBN/H2BC3/H2AX/CDKN2B/IL6/ANAPC10/H3-4/H1-3
REACTOME_INTERFERON_SIGNALING	REACTOME_INTERFERON_SIGNALING	182	0.383685	1.68702	5.29416e-05	0.000879701	0.000698127	2451	tags=34%, list=20%, signal=27%	ISG20/GBP1/USP18/ISG15/MX1/IFI6/STAT1/KPNA2/HLA-DRB4/IFI30/RSAD2/IFI27/NUP93/IFIT3/HERC5/VCAM1/OAS1/OAS3/IFNG/OASL/MT2A/MX2/SAMHD1/NUP155/ICAM1/OAS2/IRF8/IRF1/DDX58/GBP2/TRIM46/IFIT1/SEC13/NUP205/IFIT2/ABCE1/IFNA21/NDC1/UBE2L6/EIF4A3/NUP62/HLA-DQB1/HLA-G/SOCS3/NUP88/NUP85/TRIM2/EIF4G1/PTAFR/XAF1/NUP50/EIF2AK2/PTPN2/RAE1/NUP42/HLA-F/IRF9/TRIM14/PML/SOCS1/UBE2N
REACTOME_PHOSPHORYLATION_OF_THE_APC_C	REACTOME_PHOSPHORYLATION_OF_THE_APC_C	14	0.798421	2.08778	5.57193e-05	0.000916092	0.000727006	137	tags=36%, list=1%, signal=35%	UBE2C/UBE2S/CDK1/CCNB1/PLK1
WP_DNA_DAMAGE_RESPONSE	WP_DNA_DAMAGE_RESPONSE	63	0.520475	1.89526	5.62645e-05	0.000916092	0.000727006	1445	tags=29%, list=12%, signal=25%	CCNB2/CDK1/CHEK1/CCNB1/CDC25A/RAD51/CCNE1/CCNE2/MYC/E2F1/SFN/CYCS/CDC25C/CDK4/BID/CHEK2/NBN/CDK5
WP_FOCAL_ADHESION	WP_FOCAL_ADHESION	188	-0.423513	-1.73034	5.59337e-05	0.000916092	0.000727006	2191	tags=28%, list=18%, signal=23%	TESK2/MAPK3/PGF/VEGFC/CTNNB1/MYL5/TLN2/THBS3/PIK3R1/COL4A6/PIP5K1C/LAMA4/TNC/HGF/ARHGAP5/KDR/VWF/BCL2/ITGAV/COL2A1/ITGA3/CCND1/FLNC/LAMB1/DOCK1/COL1A2/PTK6/COL1A1/MYL9/PARVA/COL5A3/COL5A2/FLNB/THBS2/SHC2/PDGFC/ITGB5/IGF1R/PDGFRB/CAV1/COL6A2/LAMA2/LAMA3/TNN/LAMB2/ITGA7/THBS4/IGF1/VAV3/PDGFD/COMP/CHAD
REACTOME_DOWNSTREAM_SIGNALING_EVENTS_OF_B_CELL_RECEPTOR_BCR	REACTOME_DOWNSTREAM_SIGNALING_EVENTS_OF_B_CELL_RECEPTOR_BCR	75	0.506113	1.91972	5.79688e-05	0.000937548	0.000744034	2771	tags=48%, list=22%, signal=37%	PSMA7/PSMD3/PSMB9/PSMB5/PSMD7/PSME2/PSMB3/PSMA4/PSMB2/PSMA3/PSMA5/PSMB7/PSMD14/NFKBIB/PSME4/SEM1/PSMB10/PSMD8/PSMC3/NFKBIE/PSMD2/PSMB4/PSMC4/RASGRP1/PSMA2/FKBP1A/PSMB6/NFKBIA/NRAS/CUL1/CHUK/PSMD12/PSMA1/PSMD10/NFATC3/PSMD1
REACTOME_REGULATION_OF_RUNX2_EXPRESSION_AND_ACTIVITY	REACTOME_REGULATION_OF_RUNX2_EXPRESSION_AND_ACTIVITY	69	0.503483	1.87909	5.99984e-05	0.000963948	0.000764985	2607	tags=49%, list=21%, signal=39%	SKP2/STAT1/PSMA7/PSMD3/PSMB9/PSMB5/PSMD7/PSME2/PSMB3/DLX5/PSMA4/PSMB2/PSMA3/PSMA5/PSMB7/PSMD14/PSME4/SEM1/CBFB/PSMB10/PSMD8/PSMC3/RBX1/PSMD2/PSMB4/PSMC4/PSMA2/PSMB6/ESRRA/CUL1/PSMD12/PSMA1/GSK3B/PSMD10
REACTOME_HOMOLOGOUS_DNA_PAIRING_AND_STRAND_EXCHANGE	REACTOME_HOMOLOGOUS_DNA_PAIRING_AND_STRAND_EXCHANGE	39	0.617181	2.05981	6.3437e-05	0.00101249	0.000803506	2507	tags=54%, list=20%, signal=43%	RAD51AP1/CHEK1/EXO1/RAD51/RFC4/BLM/DNA2/RFC2/BRIP1/RMI1/RFC3/SEM1/NBN/XRCC3/BARD1/RPA3/BRCA1/BRCA2/RAD1/RAD51C/RFC5
REACTOME_MET_ACTIVATES_PTK2_SIGNALING	REACTOME_MET_ACTIVATES_PTK2_SIGNALING	28	-0.677764	-2.04459	6.43347e-05	0.0010201	0.00080955	1767	tags=54%, list=14%, signal=46%	LAMA4/HGF/COL11A1/COL2A1/ITGA3/LAMB1/COL1A2/COL1A1/COL3A1/COL5A3/COL5A2/COL5A1/LAMA2/LAMA3/LAMB2
KEGG_PRIMARY_IMMUNODEFICIENCY	KEGG_PRIMARY_IMMUNODEFICIENCY	34	0.622107	2.01643	6.67286e-05	0.00105119	0.000834222	1447	tags=41%, list=12%, signal=36%	ICOS/TAP1/LCK/IL2RG/IL7R/CD3D/CD40LG/CD8A/PTPRC/CD3E/ADA/UNG/TAP2/CD19
REACTOME_TELOMERE_MAINTENANCE	REACTOME_TELOMERE_MAINTENANCE	80	0.486889	1.86766	7.55219e-05	0.00118204	0.000938061	2507	tags=40%, list=20%, signal=32%	CCNA2/DSCC1/FEN1/RFC4/H2AZ1/H2BC12/PCNA/BLM/DNA2/H2BC11/POLA2/POLR2F/RFC2/PRIM1/RUVBL1/PRIM2/POLD1/H2BC9/RFC3/POLR2K/H2BC3/H2AX/POLD2/POLR2D/GAR1/H3-4/RPA3/NOP10/H2AC4/LIG1/H2AC14/RFC5
REACTOME_CONDENSATION_OF_PROMETAPHASE_CHROMOSOMES	REACTOME_CONDENSATION_OF_PROMETAPHASE_CHROMOSOMES	10	0.854614	2.01443	7.63348e-05	0.0011871	0.000942081	1329	tags=80%, list=11%, signal=71%	CCNB2/NCAPH/CDK1/NCAPG/CCNB1/NCAPD2/SMC4/SMC2
REACTOME_ANTIMICROBIAL_PEPTIDES	REACTOME_ANTIMICROBIAL_PEPTIDES	41	0.594613	1.99793	7.87671e-05	0.00121713	0.000965907	1394	tags=37%, list=11%, signal=33%	S100A9/S100A8/S100A7/CAMP/GNLY/LYZ/LCN2/PLA2G2A/PRSS2/PRSS3/PI3/ELANE/TLR1/BPI/SEMG1
REACTOME_CONDENSATION_OF_PROPHASE_CHROMOSOMES	REACTOME_CONDENSATION_OF_PROPHASE_CHROMOSOMES	34	0.616143	1.9971	8.34062e-05	0.00128065	0.00101632	1840	tags=44%, list=15%, signal=38%	CDK1/CCNB1/PLK1/H2AZ1/H2BC12/H2BC11/NCAPG2/H3C10/NCAPD3/SMC4/H2BC9/SMC2/H2BC3/H2AX/H3-4
KEGG_OOCYTE_MEIOSIS	KEGG_OOCYTE_MEIOSIS	91	0.464289	1.82794	8.45679e-05	0.00129033	0.001024	894	tags=21%, list=7%, signal=20%	CDC20/CCNB2/CDK1/MAD2L1/CALML5/AURKA/CCNB1/PTTG1/PLK1/ESPL1/CCNE1/CCNE2/BUB1/FBXO5/ADCY8/PRKX/PPP1CA/PKMYT1/CDC25C
REACTOME_CHK1_CHK2_CDS1_MEDIATED_INACTIVATION_OF_CYCLIN_B_CDK1_COMPLEX	REACTOME_CHK1_CHK2_CDS1_MEDIATED_INACTIVATION_OF_CYCLIN_B_CDK1_COMPLEX	12	0.80492	1.99292	8.60059e-05	0.00130406	0.0010349	1230	tags=58%, list=10%, signal=53%	CDK1/CHEK1/CCNB1/SFN/CDC25C/CHEK2/YWHAZ
REACTOME_ASYMMETRIC_LOCALIZATION_OF_PCP_PROTEINS	REACTOME_ASYMMETRIC_LOCALIZATION_OF_PCP_PROTEINS	59	0.521927	1.87043	8.6597e-05	0.00130487	0.00103554	2922	tags=49%, list=24%, signal=38%	PSMA7/PSMD3/PSMB9/PSMB5/PSMD7/PSME2/PSMB3/PSMA4/PSMB2/PSMA3/PSMA5/PSMB7/PSMD14/PSME4/SEM1/PSMB10/PSMD8/PSMC3/PSMD2/PSMB4/PSMC4/PSMA2/PSMB6/PSMD12/PSMA1/PSMD10/SCRIB/PSMD1/SMURF2
WP_BARDETBIEDL_SYNDROME	WP_BARDETBIEDL_SYNDROME	55	-0.563176	-1.91391	8.95313e-05	0.00134076	0.00106402	2883	tags=45%, list=23%, signal=35%	CFAP410/SCAPER/ARNTL/MKS1/ARL3/PKD1/NEK1/BBS10/CEP41/CEP290/BBS9/BBIP1/PKD2/FLCN/DYNC2LI1/IFT140/BBS1/WDR19/BBS4/DYNC2H1/GLI3/EVC/EFHC1/LZTFL1/MAK
REACTOME_HCMV_EARLY_EVENTS	REACTOME_HCMV_EARLY_EVENTS	86	0.47347	1.84099	9.02674e-05	0.00134349	0.00106619	3347	tags=45%, list=27%, signal=33%	EZH2/H2BC12/NUP93/H2BC11/H3C10/TUBA4A/H2AW/H2AC17/TUBA4B/TUBA1C/NUP155/H2BC9/TUBB3/SEC13/NUP205/TUBB4B/H2BC3/TUBA1B/NDC1/NUP62/EGFR/NUP88/NUP85/TUBB1/NUP50/H2AC4/RAE1/NUP42/PML/H2AC14/NUP153/SEH1L/NUP107/RBBP7/ELK1/NUP37/NUP58/TUBB6/RBBP4
REACTOME_UB_SPECIFIC_PROCESSING_PROTEASES	REACTOME_UB_SPECIFIC_PROCESSING_PROTEASES	166	0.383413	1.66209	9.17098e-05	0.00135663	0.00107662	1878	tags=27%, list=15%, signal=23%	CDC20/CCNA2/CDC25A/USP18/SKP2/MYC/H2BC12/PSMA7/PSMD3/BIRC3/PSMB9/H2BC11/PSMB5/PSMD7/IFIH1/ADRM1/PSME2/H2AW/PSMB3/RUVBL1/H2AC17/PSMA4/PSMB2/PSMA3/PSMA5/PSMB7/PSMD14/UFD1/DDX58/H2BC9/ARRB2/PSME4/SEM1/USP10/CLSPN/H2BC3/PSMB10/PSMD8/PSMC3/PTRH2/PSMD2/PSMB4/HIF1A/PSMC4/TRAF2
KEGG_CHEMOKINE_SIGNALING_PATHWAY	KEGG_CHEMOKINE_SIGNALING_PATHWAY	166	0.382341	1.65744	9.66669e-05	0.0014213	0.00112794	1409	tags=22%, list=11%, signal=20%	CXCL10/CXCL13/CXCL11/CXCL9/CCL18/CCL8/CXCL3/CCL20/CXCL8/CCL5/CXCR6/CCR1/STAT1/CCL2/CCL4/HCK/CCR8/CCR7/LYN/CCL7/ADCY8/PRKX/ITK/CCL17/DOCK2/CCR5/CCL22/XCL1/CXCL5/CXCL1/ARRB2/NFKBIB/GNGT1/CCL16/RAC2/CSK/CCL13
WP_TCELL_ANTIGEN_RECEPTOR_TCR_PATHWAY_DURING_STAPHYLOCOCCUS_AUREUS_INFECTION	WP_TCELL_ANTIGEN_RECEPTOR_TCR_PATHWAY_DURING_STAPHYLOCOCCUS_AUREUS_INFECTION	59	0.516392	1.85059	0.000110534	0.00161539	0.00128197	2641	tags=46%, list=21%, signal=36%	PDK1/ICOS/CTLA4/LCK/CD3D/IFNG/CD40LG/ITK/CD8A/CBL/CDK4/PTPRC/LCP2/CD28/PRKCQ/NCK1/MAP2K1/TNF/PDCD1/MAP2K2/GRAP2/SOS1/NFKBIA/CHUK/IL2/GSK3B/AHSA1
REACTOME_DISEASES_OF_DNA_REPAIR	REACTOME_DISEASES_OF_DNA_REPAIR	45	0.576167	1.95823	0.000113941	0.00165521	0.00131357	2507	tags=49%, list=20%, signal=39%	RAD51AP1/EXO1/RAD51/RFC4/BLM/NEIL3/DNA2/MSH2/RFC2/MSH6/BRIP1/RMI1/RFC3/SEM1/NBN/BARD1/RPA3/BRCA1/BRCA2/RAD1/RAD51C/RFC5
WP_MIRNA_REGULATION_OF_DNA_DAMAGE_RESPONSE	WP_MIRNA_REGULATION_OF_DNA_DAMAGE_RESPONSE	65	0.513424	1.88556	0.00011787	0.00170209	0.00135077	1075	tags=26%, list=9%, signal=24%	CCNB2/CDK1/CHEK1/CCNB1/CDC25A/RAD51/CCNE1/CCNE2/MYC/E2F1/MCM7/SFN/CYCS/CDC25C/CDK4/BID/CHEK2
WP_COVID19_ADVERSE_OUTCOME_PATHWAY	WP_COVID19_ADVERSE_OUTCOME_PATHWAY	14	0.782241	2.04547	0.000125753	0.00178986	0.00142043	518	tags=43%, list=4%, signal=41%	CXCL10/CXCL8/ACE2/IL2RA/CCL2/IL7
REACTOME_TRANSCRIPTION_OF_E2F_TARGETS_UNDER_NEGATIVE_CONTROL_BY_P107_RBL1_AND_P130_RBL2_IN_COMPLEX_WITH_HDAC1	REACTOME_TRANSCRIPTION_OF_E2F_TARGETS_UNDER_NEGATIVE_CONTROL_BY_P107_RBL1_AND_P130_RBL2_IN_COMPLEX_WITH_HDAC1	13	0.786651	2.01524	0.000126161	0.00178986	0.00142043	1151	tags=46%, list=9%, signal=42%	MYBL2/CCNA2/CDK1/E2F1/TFDP1/E2F5
REACTOME_ABC_TRANSPORTER_DISORDERS	REACTOME_ABC_TRANSPORTER_DISORDERS	70	0.501736	1.87592	0.000124928	0.00178986	0.00142043	2789	tags=50%, list=23%, signal=39%	PSMA7/PSMD3/PSMB9/PSMB5/PSMD7/DERL1/PSME2/PSMB3/PSMA4/PSMB2/PSMA3/PSMA5/PSMB7/PSMD14/PSME4/SEM1/ABCD1/ABCC2/PSMB10/PSMD8/PSMC3/PSMD2/PSMB4/VCP/PSMC4/CFTR/PSMA2/ABCB6/PSMB6/PSMD12/PSMA1/PSMD10/ABCB11/PSMD1/ABCG5
REACTOME_DISEASES_ASSOCIATED_WITH_GLYCOSAMINOGLYCAN_METABOLISM	REACTOME_DISEASES_ASSOCIATED_WITH_GLYCOSAMINOGLYCAN_METABOLISM	35	-0.630391	-1.99871	0.000131771	0.00185859	0.00147497	1063	tags=34%, list=9%, signal=31%	GPC1/LUM/PRELP/HSPG2/VCAN/BGN/GPC4/FMOD/DCN/KERA/OMD/OGN
BIOCARTA_THELPER_PATHWAY	BIOCARTA_THELPER_PATHWAY	12	0.797748	1.97516	0.000133067	0.00186601	0.00148086	1171	tags=75%, list=9%, signal=68%	CD2/CD3G/CD247/CD3D/ITGB2/PTPRC/CD3E/ICAM1/CD28
KEGG_ECM_RECEPTOR_INTERACTION	KEGG_ECM_RECEPTOR_INTERACTION	81	-0.511393	-1.8617	0.000137011	0.00191028	0.00151599	1956	tags=40%, list=16%, signal=33%	THBS3/COL4A6/LAMA4/TNC/COL6A1/COL11A1/VWF/ITGAV/CD36/COL2A1/ITGA3/SV2A/LAMB1/COL1A2/COL1A1/COL6A3/COL3A1/COL5A3/COL5A2/THBS2/ITGB5/HSPG2/COL5A1/COL6A2/LAMA2/LAMA3/TNN/LAMB2/ITGA7/THBS4/COMP/CHAD
WP_PROSTAGLANDIN_SIGNALING	WP_PROSTAGLANDIN_SIGNALING	31	0.634751	2.02774	0.000139793	0.00193793	0.00153793	1667	tags=39%, list=13%, signal=34%	CXCL10/CXCL9/MMP9/CXCL8/CCL2/IFNG/KLRD1/CXCL1/CD28/VEGFA/TNF/IL6
REACTOME_ASSEMBLY_OF_COLLAGEN_FIBRILS_AND_OTHER_MULTIMERIC_STRUCTURES	REACTOME_ASSEMBLY_OF_COLLAGEN_FIBRILS_AND_OTHER_MULTIMERIC_STRUCTURES	54	-0.560772	-1.89942	0.000156569	0.00215816	0.0017127	1868	tags=54%, list=15%, signal=46%	LOXL2/COL4A6/COL6A1/COL11A1/COL18A1/COL2A1/COL15A1/MMP3/CD151/PXDN/MMP13/COL1A2/COL1A1/COL6A3/COL8A1/PCOLCE/COL3A1/COL5A3/COL5A2/COL7A1/COL5A1/COL6A2/LOXL1/LAMA3/COL8A2/COL10A1/COL4A5/COL14A1/COL17A1
REACTOME_METABOLISM_OF_NUCLEOTIDES	REACTOME_METABOLISM_OF_NUCLEOTIDES	76	0.471046	1.79319	0.00015866	0.00217462	0.00172577	1646	tags=36%, list=13%, signal=31%	RRM2/NUDT1/CTPS1/TK1/UPP1/TYMS/GMPS/NME1/PNP/GMPR/DTYMK/TXNRD1/PPAT/APRT/DPYS/SAMHD1/UPB1/PAICS/DNPH1/DCK/TXN/ADA/HPRT1/ADSL/NT5C2/AK2/TYMP
REACTOME_COLLAGEN_FORMATION	REACTOME_COLLAGEN_FORMATION	74	-0.51046	-1.82323	0.000164635	0.00224384	0.00178071	1868	tags=43%, list=15%, signal=37%	LOXL2/COL4A6/COL6A1/COL11A1/COL18A1/COL2A1/COL15A1/MMP3/CD151/PXDN/MMP13/COL1A2/COL1A1/COL21A1/COL6A3/COL8A1/PCOLCE/COL3A1/COL5A3/COL5A2/P3H3/COL7A1/COL5A1/COL6A2/LOXL1/LAMA3/COL8A2/COL10A1/COL4A5/COL14A1/COL16A1/COL17A1
WP_DNA_IRDOUBLE_STRAND_BREAKS_AND_CELLULAR_RESPONSE_VIA_ATM	WP_DNA_IRDOUBLE_STRAND_BREAKS_AND_CELLULAR_RESPONSE_VIA_ATM	54	0.535178	1.91523	0.000170628	0.00231253	0.00183522	2231	tags=37%, list=18%, signal=30%	CHEK1/EXO1/RAD51/PCNA/BLM/E2F1/CDKN2A/BAK1/CDC25C/BID/CHEK2/NBN/ACTL6A/CDK5/PARP1/H2AX/BRCA1/HSF1/BRCA2/PRKDC
KEGG_CYTOKINE_CYTOKINE_RECEPTOR_INTERACTION	KEGG_CYTOKINE_CYTOKINE_RECEPTOR_INTERACTION	233	0.339795	1.54178	0.000173671	0.0023407	0.00185757	2219	tags=30%, list=18%, signal=25%	CXCL10/CXCL13/CXCL11/CXCL9/CCL18/IL1R2/CCL8/CXCL3/CCL20/IL12RB2/CXCL8/TNFRSF11A/CCL5/CXCR6/IL2RA/CCR1/CCL2/IL2RG/CCL4/CCR8/CCR7/GDF5/IL24/LTB/IL7/IL7R/CCL7/TNFRSF17/IFNG/CD40LG/TNFRSF21/IL21R/CSF2RB/CCL17/CCR5/CCL22/XCL1/CXCL5/IL15/CXCL1/IL18RAP/CD27/CCL16/VEGFA/IFNW1/CCL13/IFNA21/IL15RA/CRLF2/TNF/IL19/IL6/LTA/CXCR4/LTBR/EGFR/IL1RAP/CX3CL1/IL13/TNFRSF4/CXCR3/BMP7/FASLG/TNFRSF1B/CD40/CSF2RA/EGF/IL…
REACTOME_MAPK6_MAPK4_SIGNALING	REACTOME_MAPK6_MAPK4_SIGNALING	82	0.463396	1.7764	0.000186729	0.00250279	0.0019862	3275	tags=49%, list=26%, signal=36%	CDK1/MYC/PSMA7/PSMD3/PSMB9/PSMB5/PSMD7/PSME2/PSMB3/PSMA4/PSMB2/PSMA3/PSMA5/PSMB7/PSMD14/PSME4/SEM1/KALRN/PSMB10/PSMD8/PSMC3/PSMD2/ETV4/PSMB4/PSMC4/PSMA2/PSMB6/PRKACB/PSMD12/PSMA1/MAPK6/NCOA3/PSMD10/PSMD1/PRKACG/AGO3/PAK1/PSMB8/XPO1/MAPKAPK5
REACTOME_INTERLEUKIN_1_SIGNALING	REACTOME_INTERLEUKIN_1_SIGNALING	102	0.437117	1.75988	0.000189209	0.00252209	0.00200152	2503	tags=40%, list=20%, signal=32%	IL1R2/USP18/RIPK2/PSMA7/PSMD3/IRAK1/PSMB9/PSMB5/PSMD7/PSME2/PSMB3/S100A12/PSMA4/PSMB2/PSMA3/PSMA5/PSMB7/PSMD14/NFKBIB/PSME4/S100B/SEM1/PSMB10/PSMD8/PSMC3/MAP2K1/RBX1/PSMD2/PSMB4/PSMC4/TRAF2/IL1RAP/PSMA2/PSMB6/NFKBIA/PELI1/CUL1/UBE2N/CHUK/PSMD12/PSMA1
BIOCARTA_PROTEASOME_PATHWAY	BIOCARTA_PROTEASOME_PATHWAY	18	0.732707	2.03841	0.000197545	0.00261882	0.00207828	2503	tags=83%, list=20%, signal=67%	PSMA7/PSMB5/PSMB3/PSMA4/PSMB2/PSMA3/PSMA5/PSMB7/RPN2/RPN1/PSMB4/PSMA2/UBE2A/PSMB6/PSMA1
REACTOME_REGULATION_OF_TP53_ACTIVITY	REACTOME_REGULATION_OF_TP53_ACTIVITY	139	0.395291	1.67477	0.000203386	0.0026816	0.0021281	2507	tags=27%, list=20%, signal=21%	TPX2/CCNA2/CDK1/AURKB/CHEK1/AURKA/EXO1/TAF13/RFC4/PRDM1/BLM/CDKN2A/DNA2/RFC2/HDAC2/BRIP1/CHEK2/GATAD2A/TAF2/RMI1/RFC3/NBN/POU4F1/CDK5/TP53BP2/SSRP1/BARD1/RPA3/BRCA1/CSNK2B/TAF11/TAF4B/PML/RAD1/SGK1/TAF7L/RFC5
REACTOME_HCMV_INFECTION	REACTOME_HCMV_INFECTION	101	0.434049	1.75133	0.000204906	0.00268704	0.00213242	3347	tags=41%, list=27%, signal=30%	EZH2/H2BC12/NUP93/H2BC11/H3C10/TUBA4A/H2AW/H2AC17/TUBA4B/TUBA1C/NUP155/H2BC9/TUBB3/SEC13/NUP205/TUBB4B/H2BC3/TUBA1B/NDC1/NUP62/EGFR/VPS37B/NUP88/NUP85/TUBB1/NUP50/CHMP1A/H2AC4/RAE1/NUP42/PML/H2AC14/NUP153/SEH1L/NUP107/RBBP7/ELK1/NUP37/NUP58/TUBB6/RBBP4
REACTOME_TRNA_PROCESSING_IN_THE_NUCLEUS	REACTOME_TRNA_PROCESSING_IN_THE_NUCLEUS	49	0.553252	1.92254	0.000212767	0.00277512	0.00220232	3299	tags=53%, list=27%, signal=39%	RPP25/NUP93/XPOT/RPP40/NUP155/SEC13/C2orf49/NUP205/POP7/NDC1/NUP62/RAN/POP4/RPP38/NUP88/NUP85/NUP50/RAE1/NUP42/POP1/NUP153/SEH1L/RPP30/NUP107/NUP37/NUP58
BIOCARTA_NO2IL12_PATHWAY	BIOCARTA_NO2IL12_PATHWAY	15	0.756778	2.0086	0.000217446	0.00280597	0.00222681	1013	tags=53%, list=8%, signal=49%	IL12RB2/CD2/CD3G/CD247/CD3D/IFNG/CCR5/CD3E
REACTOME_INTERACTIONS_OF_REV_WITH_HOST_CELLULAR_PROTEINS	REACTOME_INTERACTIONS_OF_REV_WITH_HOST_CELLULAR_PROTEINS	35	0.611696	1.99673	0.000216315	0.00280597	0.00222681	3299	tags=66%, list=27%, signal=48%	NUP93/RANBP1/RCC1/NUP155/SEC13/NUP205/NDC1/NUP62/RANGAP1/RAN/NUP88/NUP85/NUP50/RAE1/NUP42/NUP153/SEH1L/NUP107/NPM1/XPO1/NUP37/KPNB1/NUP58
WP_PATHOGENESIS_OF_SARSCOV2_MEDIATED_BY_NSP9NSP10_COMPLEX	WP_PATHOGENESIS_OF_SARSCOV2_MEDIATED_BY_NSP9NSP10_COMPLEX	19	0.713727	2.01996	0.000229644	0.00294661	0.00233842	1667	tags=47%, list=13%, signal=41%	CXCL8/LCK/CD2/CD3G/CD247/CD8A/CD3E/LBP/IL6
REACTOME_RUNX1_REGULATES_TRANSCRIPTION_OF_GENES_INVOLVED_IN_DIFFERENTIATION_OF_HSCS	REACTOME_RUNX1_REGULATES_TRANSCRIPTION_OF_GENES_INVOLVED_IN_DIFFERENTIATION_OF_HSCS	86	0.459682	1.78737	0.000230773	0.00294661	0.00233842	2607	tags=44%, list=21%, signal=35%	H2AZ1/H2BC12/PSMA7/PSMD3/PSMB9/H2BC11/H3C10/PSMB5/PSMD7/PSME2/PSMB3/PSMA4/PSMB2/PSMA3/PSMA5/PSMB7/PSMD14/H2BC9/PSME4/SEM1/CBFB/H2BC3/PSMB10/PSMD8/PSMC3/H2AX/PSMD2/ITCH/PSMB4/PSMC4/PSMA2/H2AC4/PSMB6/LMO1/H2AC14/PSMD12/PSMA1/PSMD10
WP_ADIPOGENESIS	WP_ADIPOGENESIS	125	-0.439355	-1.70555	0.000232908	0.0029583	0.0023477	2269	tags=34%, list=18%, signal=28%	NCOR1/FZD1/RB1/KLF7/CTNNB1/NR3C1/SMAD3/IRS2/ID3/STAT6/NCOA1/RXRG/GDF10/RARA/STAT5A/EPAS1/AHR/NRIP1/NDN/MEF2C/FOXO1/PPARG/SPOCK1/LPL/CYP26A1/UCP1/WNT5B/LEP/CFD/PRLR/SREBF1/LIPE/FRZB/IRS1/IL6ST/IGF1/SFRP4/ADIPOQ/PCK1/BMP4/PLIN1/GATA3
PID_CD8_TCR_DOWNSTREAM_PATHWAY	PID_CD8_TCR_DOWNSTREAM_PATHWAY	62	0.500504	1.81864	0.000235248	0.00297246	0.00235893	3132	tags=50%, list=25%, signal=38%	GZMB/FOSL1/PRF1/IL2RA/IL2RG/CD3G/CD247/CD3D/IFNG/CD8A/PTPN7/CD3E/EGR4/PRKCQ/IFNA21/MAP2K1/TNF/TNFRSF4/FASLG/MAP2K2/MAPK1/PRKCA/NRAS/IL2/IL2RB/NFATC3/CD8B/IFNAR2/PPP3R1/ELK1/PRKCB
WP_MIRNA_TARGETS_IN_ECM_AND_MEMBRANE_RECEPTORS	WP_MIRNA_TARGETS_IN_ECM_AND_MEMBRANE_RECEPTORS	21	-0.695892	-1.97189	0.000242004	0.00304198	0.0024141	2594	tags=76%, list=21%, signal=60%	SDC2/ITGA1/THBS1/LAMC1/LAMA4/COL6A1/COL1A2/COL6A3/COL3A1/COL5A3/COL5A2/THBS2/ITGB5/COL5A1/COL6A2/LAMB2
REACTOME_ANTIVIRAL_MECHANISM_BY_IFN_STIMULATED_GENES	REACTOME_ANTIVIRAL_MECHANISM_BY_IFN_STIMULATED_GENES	76	0.463068	1.76282	0.000261572	0.003271	0.00259585	3299	tags=51%, list=27%, signal=38%	USP18/ISG15/MX1/STAT1/KPNA2/NUP93/HERC5/OAS1/OAS3/OASL/MX2/NUP155/OAS2/DDX58/IFIT1/SEC13/NUP205/ABCE1/NDC1/UBE2L6/EIF4A3/NUP62/NUP88/NUP85/EIF4G1/NUP50/EIF2AK2/RAE1/NUP42/UBE2N/NUP153/SEH1L/EIF4E2/EIF4E/NUP107/KPNA5/NUP37/KPNB1/NUP58
REACTOME_INTERFERON_ALPHA_BETA_SIGNALING	REACTOME_INTERFERON_ALPHA_BETA_SIGNALING	71	0.481875	1.81161	0.000271738	0.0033807	0.00268291	1535	tags=31%, list=12%, signal=27%	ISG20/USP18/ISG15/MX1/IFI6/STAT1/RSAD2/IFI27/IFIT3/OAS1/OAS3/OASL/MX2/SAMHD1/OAS2/IRF8/IRF1/GBP2/IFIT1/IFIT2/ABCE1/IFNA21
BIOCARTA_TCRA_PATHWAY	BIOCARTA_TCRA_PATHWAY	11	0.816378	1.97454	0.000284933	0.00352677	0.00279883	1013	tags=64%, list=8%, signal=58%	LCK/HLA-DRB4/CD3G/CD247/CD3D/PTPRC/CD3E
KEGG_P53_SIGNALING_PATHWAY	KEGG_P53_SIGNALING_PATHWAY	62	0.495135	1.79913	0.000295157	0.00363478	0.00288454	1075	tags=26%, list=9%, signal=24%	CCNB2/RRM2/CDK1/CHEK1/CCNB1/GTSE1/CCNE1/CCNE2/SERPINB5/CDKN2A/SFN/CYCS/CDK4/BID/ADGRB1/CHEK2
REACTOME_FACTORS_INVOLVED_IN_MEGAKARYOCYTE_DEVELOPMENT_AND_PLATELET_PRODUCTION	REACTOME_FACTORS_INVOLVED_IN_MEGAKARYOCYTE_DEVELOPMENT_AND_PLATELET_PRODUCTION	127	0.405422	1.68897	0.000319672	0.00391679	0.00310835	1535	tags=21%, list=12%, signal=19%	KIF23/CENPE/KIF18A/KIF11/KIFC1/KIF18B/KIF20A/KIF4A/KIF2C/RACGAP1/KIF15/H3C10/TUBA4A/KIF20B/MAFF/HDAC2/TUBA4B/TUBA1C/DOCK2/DOCK3/IRF1/TUBB3/TUBB4B/CDK5/TUBA1B/KDM1A/IFNA21
REACTOME_DNA_DAMAGE_TELOMERE_STRESS_INDUCED_SENESCENCE	REACTOME_DNA_DAMAGE_TELOMERE_STRESS_INDUCED_SENESCENCE	53	0.521051	1.85294	0.00032856	0.00400546	0.00317872	1859	tags=36%, list=15%, signal=31%	CCNA2/LMNB1/HMGA1/CCNE1/CCNE2/H2AZ1/H2BC12/H2BC11/H1-1/H1-2/H1-4/HIRA/H1-5/H2BC9/NBN/H2BC3/H2AX/H3-4/H1-3
WP_PHOTODYNAMIC_THERAPYINDUCED_NFKB_SURVIVAL_SIGNALING	WP_PHOTODYNAMIC_THERAPYINDUCED_NFKB_SURVIVAL_SIGNALING	34	0.585428	1.89754	0.000331537	0.00402155	0.00319148	1901	tags=41%, list=15%, signal=35%	MMP1/BCL2A1/BIRC5/MMP9/CXCL8/BIRC3/VCAM1/CD40LG/ICAM1/VEGFA/TNF/IL6/PTGS2/RELB
REACTOME_CLEC7A_DECTIN_1_SIGNALING	REACTOME_CLEC7A_DECTIN_1_SIGNALING	92	0.439198	1.73564	0.000340729	0.00411248	0.00326365	2771	tags=45%, list=22%, signal=35%	CLEC7A/PSMA7/PSMD3/PSMB9/PSMB5/PSMD7/PLCG2/PSME2/PSMB3/PSMA4/CCL17/PSMB2/PSMA3/CCL22/PSMA5/PSMB7/PSMD14/PSME4/SEM1/PSMB10/PSMD8/SYK/PSMC3/PSMD2/PSMB4/CARD9/PSMC4/RELB/PSMA2/PSMB6/NFKBIA/UBE2D1/CDC34/CUL1/UBE2N/CHUK/PSMD12/PSMA1/PSMD10/NFATC3/PSMD1
REACTOME_MET_PROMOTES_CELL_MOTILITY	REACTOME_MET_PROMOTES_CELL_MOTILITY	38	-0.597226	-1.91613	0.000352827	0.00423741	0.00336279	2070	tags=45%, list=17%, signal=37%	LAMC1/TNS3/LAMA4/HGF/COL11A1/COL2A1/ITGA3/LAMB1/COL1A2/COL1A1/COL3A1/COL5A3/COL5A2/COL5A1/LAMA2/LAMA3/LAMB2
WP_DEVELOPMENT_OF_URETERIC_COLLECTION_SYSTEM	WP_DEVELOPMENT_OF_URETERIC_COLLECTION_SYSTEM	55	-0.537989	-1.82832	0.000365498	0.00436797	0.0034664	2766	tags=49%, list=22%, signal=38%	GPC3/ITGA8/FGFR2/CELSR1/ILK/SMAD1/PBX1/CTNNB1/GREB1L/GLI1/RARA/SALL1/GRIP1/CCND1/SPRY1/TGFB2/SLIT2/SHH/CRIM1/FAT4/FST/WNT11/GFRA1/GLI3/ANOS1/BMP4/GATA3
REACTOME_TP53_REGULATES_TRANSCRIPTION_OF_CELL_CYCLE_GENES	REACTOME_TP53_REGULATES_TRANSCRIPTION_OF_CELL_CYCLE_GENES	43	0.560645	1.89254	0.000374446	0.00445297	0.00353386	1107	tags=28%, list=9%, signal=25%	E2F8/CCNA2/CDK1/AURKA/CCNB1/CCNE1/CCNE2/PCNA/E2F1/SFN/CDC25C/TFDP1
REACTOME_SNRNP_ASSEMBLY	REACTOME_SNRNP_ASSEMBLY	47	0.542064	1.86486	0.000399009	0.00472193	0.0037473	3299	tags=53%, list=27%, signal=39%	NUP93/SNRPD3/SNRPD1/NUP155/SNRPF/SEC13/NUP205/SNRPG/NDC1/SNRPB/GEMIN6/NUP62/NUP88/NUP85/WDR77/NUP50/RAE1/NUP42/NCBP1/NUP153/SNRPD2/SEH1L/NUP107/NUP37/NUP58
REACTOME_BASE_EXCISION_REPAIR	REACTOME_BASE_EXCISION_REPAIR	60	0.499311	1.79748	0.000411858	0.00485033	0.0038492	2620	tags=45%, list=21%, signal=36%	FEN1/RFC4/H2AZ1/H2BC12/PCNA/NEIL3/H2BC11/POLE2/RFC2/POLD1/UNG/H2BC9/RFC3/H2BC3/PARP1/H2AX/POLD2/POLE3/H3-4/RPA3/TDG/H2AC4/LIG1/H2AC14/RFC5/PARP2/APEX1
REACTOME_KERATAN_SULFATE_DEGRADATION	REACTOME_KERATAN_SULFATE_DEGRADATION	13	-0.773378	-1.92824	0.000435419	0.00510302	0.00404974	1554	tags=62%, list=13%, signal=54%	HEXA/GLB1L/LUM/PRELP/FMOD/KERA/OMD/OGN
PID_TCR_PATHWAY	PID_TCR_PATHWAY	58	0.497125	1.78468	0.000468092	0.00545957	0.00433269	2479	tags=41%, list=20%, signal=33%	LCK/FYB1/CD3G/CD247/CD3D/TRPV6/MAP4K1/ITK/CD86/CBL/PTPRC/CD3E/LCP2/CD28/PRKCQ/CSK/NCK1/WAS/RASGRP1/GRAP2/SOS1/PRKCA/NRAS/CHUK
PID_CD8_TCR_PATHWAY	PID_CD8_TCR_PATHWAY	49	0.5306	1.84383	0.000472354	0.00548292	0.00435122	2479	tags=43%, list=20%, signal=34%	LCK/PRF1/CD3G/CD247/CD3D/TRPV6/CD8A/CD86/CBL/PTPRC/CD3E/LCP2/CD28/PRKCQ/CSK/RASGRP1/GRAP2/SOS1/PRKCA/NRAS/CHUK
REACTOME_DEGRADATION_OF_BETA_CATENIN_BY_THE_DESTRUCTION_COMPLEX	REACTOME_DEGRADATION_OF_BETA_CATENIN_BY_THE_DESTRUCTION_COMPLEX	79	0.464825	1.77947	0.000479763	0.0055424	0.00439842	2607	tags=39%, list=21%, signal=31%	MYC/PSMA7/PSMD3/PSMB9/PSMB5/PSMD7/PSME2/PSMB3/PSMA4/PSMB2/PSMA3/PSMA5/PSMB7/PSMD14/TLE1/PSME4/SEM1/PSMB10/PSMD8/PSMC3/RBX1/PSMD2/PSMB4/PSMC4/PSMA2/PSMB6/CUL1/PSMD12/PSMA1/GSK3B/PSMD10
WP_TOLLLIKE_RECEPTOR_SIGNALING_PATHWAY	WP_TOLLLIKE_RECEPTOR_SIGNALING_PATHWAY	97	0.437525	1.75096	0.000495013	0.00566463	0.00449543	2802	tags=36%, list=23%, signal=28%	CXCL10/CXCL11/CXCL9/CXCL8/CCL5/STAT1/TLR8/CCL4/IRAK1/CD86/TLR1/SPP1/LBP/NFKBIB/MAPK13/CD14/IFNA21/MAP2K1/TNF/IL6/TLR2/FADD/MAP2K2/CD40/MAPK1/NFKBIA/IKBKE/IL12B/CHUK/IL12A/MAPK12/TLR6/MAP2K3/IRF5/MAPK14
REACTOME_GLUCOSE_METABOLISM	REACTOME_GLUCOSE_METABOLISM	86	0.447044	1.73823	0.000492997	0.00566463	0.00449543	3541	tags=56%, list=29%, signal=40%	PFKP/NUP93/HK3/GAPDHS/SLC25A1/GPI/TPI1/GAPDH/PGK1/NUP155/ENO1/PGAM1/PFKFB2/SEC13/PCK2/MDH1/PFKFB4/NUP205/PKM/SLC37A4/NDC1/GOT1/NUP62/HK2/SLC25A13/NUP88/NUP85/SLC37A1/NUP50/RAE1/PRKACB/NUP42/SLC25A10/PGK2/NUP153/SEH1L/ENO3/PFKL/GCKR/PRKACG/NUP107/PFKFB3/NUP37/NUP58/FBP2/MDH2/PKLR/ALDOB
REACTOME_REGULATION_OF_TP53_ACTIVITY_THROUGH_PHOSPHORYLATION	REACTOME_REGULATION_OF_TP53_ACTIVITY_THROUGH_PHOSPHORYLATION	81	0.454883	1.74016	0.000511815	0.00582941	0.00462619	2507	tags=35%, list=20%, signal=28%	TPX2/CCNA2/AURKB/CHEK1/AURKA/EXO1/TAF13/RFC4/BLM/DNA2/RFC2/BRIP1/CHEK2/TAF2/RMI1/RFC3/NBN/CDK5/SSRP1/BARD1/RPA3/BRCA1/CSNK2B/TAF11/TAF4B/RAD1/TAF7L/RFC5
BIOCARTA_G2_PATHWAY	BIOCARTA_G2_PATHWAY	24	0.645064	1.93487	0.000532003	0.00595284	0.00472415	1075	tags=33%, list=9%, signal=30%	CDK1/CHEK1/CCNB1/CDC25A/PLK1/CDC25B/CDC25C/CHEK2
BIOCARTA_GHRELIN_PATHWAY	BIOCARTA_GHRELIN_PATHWAY	12	-0.761218	-1.85937	0.000528569	0.00595284	0.00472415	1651	tags=58%, list=13%, signal=51%	SST/IGFALS/GHRH/IGFBP2/IGFBP6/IGFBP4/IGF1
KEGG_TYROSINE_METABOLISM	KEGG_TYROSINE_METABOLISM	39	-0.574058	-1.84778	0.000529598	0.00595284	0.00472415	1696	tags=38%, list=14%, signal=33%	METTL2B/TPO/FAH/DBH/GSTZ1/AOX1/LCMT2/ADH1C/NAA80/HEMK1/AOC3/MAOA/TAT/MAOB/ADH1B
REACTOME_TRANSCRIPTIONAL_REGULATION_BY_SMALL_RNAS	REACTOME_TRANSCRIPTIONAL_REGULATION_BY_SMALL_RNAS	63	0.479119	1.74467	0.000532467	0.00595284	0.00472415	3408	tags=51%, list=28%, signal=37%	H2AZ1/H2BC12/NUP93/H2BC11/H3C10/POLR2F/NUP155/H2BC9/POLR2K/SEC13/NUP205/H2BC3/NDC1/H2AX/NUP62/POLR2D/RAN/NUP88/NUP85/NUP50/H2AC4/RAE1/NUP42/H2AC14/POLR2H/NUP153/SEH1L/NUP107/NUP37/POLR2J/NUP58/AGO1
REACTOME_TP53_REGULATES_TRANSCRIPTION_OF_GENES_INVOLVED_IN_G2_CELL_CYCLE_ARREST	REACTOME_TP53_REGULATES_TRANSCRIPTION_OF_GENES_INVOLVED_IN_G2_CELL_CYCLE_ARREST	17	0.714872	1.95029	0.000535123	0.00595508	0.00472593	1411	tags=47%, list=11%, signal=42%	CDK1/AURKA/CCNB1/PCNA/SFN/CDC25C/TFDP1/PRMT1
REACTOME_HCMV_LATE_EVENTS	REACTOME_HCMV_LATE_EVENTS	61	0.488255	1.76228	0.000550102	0.00609383	0.00483604	2741	tags=39%, list=22%, signal=31%	H2BC12/NUP93/H2BC11/H3C10/H2AW/H2AC17/NUP155/H2BC9/SEC13/NUP205/H2BC3/NDC1/NUP62/VPS37B/NUP88/NUP85/NUP50/CHMP1A/H2AC4/RAE1/NUP42/H2AC14/NUP153/SEH1L
REACTOME_EXTENSION_OF_TELOMERES	REACTOME_EXTENSION_OF_TELOMERES	46	0.525977	1.80786	0.000573085	0.00631957	0.00501518	1898	tags=37%, list=15%, signal=31%	CCNA2/DSCC1/FEN1/RFC4/PCNA/BLM/DNA2/POLA2/RFC2/PRIM1/RUVBL1/PRIM2/POLD1/RFC3/POLD2/GAR1/RPA3
WP_ENDOCHONDRAL_OSSIFICATION	WP_ENDOCHONDRAL_OSSIFICATION	59	-0.511752	-1.76474	0.000608955	0.00665461	0.00528107	2112	tags=47%, list=17%, signal=40%	HDAC4/DDR2/CAB39/RUNX2/PTH1R/CDKN1C/COL2A1/FGFR3/MGP/TGFB2/MEF2C/MMP13/IFT88/TIMP3/FGF2/ADAMTS5/SCIN/IGF1R/GHR/FGF18/ENPP1/GLI3/PTHLH/FRZB/PLAT/COL10A1/CST5/IGF1
WP_ENDOCHONDRAL_OSSIFICATION_WITH_SKELETAL_DYSPLASIAS	WP_ENDOCHONDRAL_OSSIFICATION_WITH_SKELETAL_DYSPLASIAS	59	-0.511752	-1.76474	0.000608955	0.00665461	0.00528107	2112	tags=47%, list=17%, signal=40%	HDAC4/DDR2/CAB39/RUNX2/PTH1R/CDKN1C/COL2A1/FGFR3/MGP/TGFB2/MEF2C/MMP13/IFT88/TIMP3/FGF2/ADAMTS5/SCIN/IGF1R/GHR/FGF18/ENPP1/GLI3/PTHLH/FRZB/PLAT/COL10A1/CST5/IGF1
REACTOME_SIGNALING_BY_RECEPTOR_TYROSINE_KINASES	REACTOME_SIGNALING_BY_RECEPTOR_TYROSINE_KINASES	478	-0.316921	-1.40986	0.00061775	0.00672045	0.00533332	2394	tags=26%, list=19%, signal=22%	USP8/DNM3/ATP6V1G2/ERBB3/FOSB/ITPR2/VEGFB/CMA1/FGFR2/APH1B/PTPN18/THBS1/HNRNPM/TIA1/COL9A2/LAMC1/RASA1/POLR2L/SPRED2/GAB2/NCOR1/HSPB1/ATF1/CDC37/MAPK3/PGF/VEGFC/CTNNB1/TNS3/EGR3/BDNF/FGF7/ERBIN/THBS3/IRS2/ID3/FLRT3/ADAM12/PIK3R1/STAT6/GTF2F1/LAMA4/HGF/COL6A1/SPRY2/LYL1/KDR/COL11A1/EGR1/INSR/FLT3/STAT5A/AXL/PRKCZ/ITGAV/RPS6KA5/COL2A1/ITGA3/FGFR3/WWP1/CYFIP2/FGF1/NEDD4/NGF/SPRY1/LAMB1/DOCK1/ID1/MEF…
REACTOME_FORMATION_OF_TUBULIN_FOLDING_INTERMEDIATES_BY_CCT_TRIC	REACTOME_FORMATION_OF_TUBULIN_FOLDING_INTERMEDIATES_BY_CCT_TRIC	22	0.661575	1.95283	0.000639225	0.00692303	0.00549409	2243	tags=59%, list=18%, signal=48%	CCT5/TUBA4A/CCT6A/TUBA4B/CCT2/TUBA1C/TUBB3/TUBB4B/TUBA1B/CCT3/TUBB1/CCT7/CCT4
REACTOME_DISEASES_OF_GLYCOSYLATION	REACTOME_DISEASES_OF_GLYCOSYLATION	109	-0.429503	-1.63856	0.000666567	0.00718707	0.00570363	1554	tags=22%, list=13%, signal=19%	HEXA/THSD4/ADAMTS20/ALG13/GPC1/MUC7/LUM/THSD7A/PRELP/MUC6/SEMA5A/THBS2/ADAMTS5/HSPG2/VCAN/BGN/SPON1/GPC4/FMOD/DCN/MUC1/KERA/OMD/OGN
REACTOME_SUMOYLATION_OF_INTRACELLULAR_RECEPTORS	REACTOME_SUMOYLATION_OF_INTRACELLULAR_RECEPTORS	30	-0.619079	-1.90168	0.000675631	0.00725257	0.00575561	2356	tags=40%, list=19%, signal=32%	NR5A1/PIAS3/HDAC4/NR3C1/RARA/NR4A2/NR5A2/PPARG/ESR1/NR3C2/AR/PGR
WP_EXTRAFOLLICULAR_B_CELL_ACTIVATION_BY_SARSCOV2	WP_EXTRAFOLLICULAR_B_CELL_ACTIVATION_BY_SARSCOV2	65	0.477961	1.75532	0.000681935	0.00728799	0.00578372	1727	tags=40%, list=14%, signal=35%	ICOS/ISG15/SELL/PRDM1/SLAMF7/CCR7/IFNG/CD40LG/GPR183/CD69/ITGB2/PTPRC/TBX21/IRF8/EBI3/IFIT2/CD19/CD82/SYK/TNF/CD1D/IL6/CXCR4/CR1/BCR/PDCD1
WP_GENES_RELATED_TO_PRIMARY_CILIUM_DEVELOPMENT_BASED_ON_CRISPR	WP_GENES_RELATED_TO_PRIMARY_CILIUM_DEVELOPMENT_BASED_ON_CRISPR	66	-0.502892	-1.77148	0.000698571	0.00743304	0.00589883	4147	tags=53%, list=34%, signal=35%	INPP5E/IFT81/CLUAP1/B9D1/RAB23/KIF3A/MKKS/FUZ/TCTN3/TXNDC15/TRAPPC11/MKS1/OFD1/TCTN1/ARL3/TTBK2/BBS10/KIF3B/IFT46/KIAA0753/CEP295/BBS9/PIBF1/IFT88/DYNC2LI1/TTC23/IFT140/CEP162/BBS1/WDR19/BBS4/DYNC2H1/CPLANE1/EVC/LZTFL1
WP_CORI_CYCLE	WP_CORI_CYCLE	17	0.707126	1.92916	0.000722151	0.00765038	0.00607131	1302	tags=53%, list=11%, signal=47%	PFKP/GPI/TPI1/GAPDH/PGK1/G6PD/PGAM1/SLC2A1/TALDO1
REACTOME_INTERACTIONS_OF_VPR_WITH_HOST_CELLULAR_PROTEINS	REACTOME_INTERACTIONS_OF_VPR_WITH_HOST_CELLULAR_PROTEINS	35	0.582055	1.89997	0.000730939	0.00770982	0.00611848	3299	tags=57%, list=27%, signal=42%	HMGA1/NUP93/SLC25A5/NUP155/PSIP1/SEC13/NUP205/NDC1/BANF1/NUP62/NUP88/NUP85/NUP50/RAE1/NUP42/NUP153/SEH1L/NUP107/NUP37/NUP58
REACTOME_LAGGING_STRAND_SYNTHESIS	REACTOME_LAGGING_STRAND_SYNTHESIS	20	0.668858	1.92714	0.000751839	0.00789594	0.00626618	2507	tags=70%, list=20%, signal=56%	FEN1/RFC4/PCNA/DNA2/POLA2/RFC2/PRIM1/PRIM2/POLD1/RFC3/POLD2/RPA3/LIG1/RFC5
NABA_BASEMENT_MEMBRANES	NABA_BASEMENT_MEMBRANES	32	-0.624505	-1.93924	0.000758936	0.00793611	0.00629806	1861	tags=50%, list=15%, signal=43%	COL4A6/NID1/LAMA4/COL6A1/COL18A1/COL15A1/LAMB1/NID2/COL6A3/HSPG2/COL6A2/LAMA2/LAMA3/COLQ/LAMB2/COL4A5
REACTOME_TRNA_PROCESSING	REACTOME_TRNA_PROCESSING	86	0.439052	1.70716	0.000768068	0.00799714	0.00634649	3299	tags=45%, list=27%, signal=33%	RPP25/NUP93/CDKAL1/XPOT/TRMU/RPP40/NUP155/EPRS1/HSD17B10/SEC13/C2orf49/NUP205/LAGE3/TRMT11/POP7/NDC1/PUS1/NUP62/DUS2/RAN/POP4/RPP38/PUS7/NUP88/NUP85/NUP50/RAE1/NUP42/POP1/NUP153/SEH1L/RPP30/QTRT2/NUP107/TRIT1/METTL1/TRDMT1/NUP37/NUP58
REACTOME_RESPONSE_OF_EIF2AK1_HRI_TO_HEME_DEFICIENCY	REACTOME_RESPONSE_OF_EIF2AK1_HRI_TO_HEME_DEFICIENCY	15	0.724572	1.92312	0.000785933	0.00814817	0.00646635	1572	tags=47%, list=13%, signal=41%	CHAC1/ASNS/CEBPG/CEBPB/EIF2S2/ATF3/ATF4
REACTOME_SENESCENCE_ASSOCIATED_SECRETORY_PHENOTYPE_SASP	REACTOME_SENESCENCE_ASSOCIATED_SECRETORY_PHENOTYPE_SASP	66	0.463891	1.71315	0.000796543	0.00822303	0.00652576	1762	tags=27%, list=14%, signal=24%	UBE2C/UBE2S/CCNA2/CXCL8/H2AZ1/H2BC12/CDKN2A/CEBPB/H2BC11/H3C10/CDKN2C/CDK4/H2BC9/H2BC3/H2AX/CDKN2B/IL6/ANAPC10
PID_FANCONI_PATHWAY	PID_FANCONI_PATHWAY	40	0.558108	1.87561	0.000805301	0.00827822	0.00656956	2507	tags=48%, list=20%, signal=38%	CHEK1/FANCI/FANCA/RFC4/BLM/FANCE/RFC2/USP1/BRIP1/RMI1/FANCG/RFC3/NBN/H2AX/XRCC3/BRCA1/BRCA2/RAD1/RFC5
REACTOME_NUCLEAR_IMPORT_OF_REV_PROTEIN	REACTOME_NUCLEAR_IMPORT_OF_REV_PROTEIN	32	0.592713	1.91919	0.000816096	0.00834684	0.00662402	3299	tags=62%, list=27%, signal=46%	NUP93/RCC1/NUP155/SEC13/NUP205/NDC1/NUP62/RAN/NUP88/NUP85/NUP50/RAE1/NUP42/NUP153/SEH1L/NUP107/NPM1/NUP37/KPNB1/NUP58
REACTOME_DEPOLYMERISATION_OF_THE_NUCLEAR_LAMINA	REACTOME_DEPOLYMERISATION_OF_THE_NUCLEAR_LAMINA	12	0.759986	1.88167	0.000818857	0.00834684	0.00662402	1193	tags=42%, list=10%, signal=38%	CDK1/CCNB1/LMNB1/TMPO/LPIN1
WP_CILIOPATHIES	WP_CILIOPATHIES	106	-0.439419	-1.67683	0.000895319	0.00908805	0.00721224	2777	tags=35%, list=22%, signal=27%	MKS1/OFD1/TCTN1/ARL3/PKD1/NEK1/TTBK2/NME7/AHI1/BBS10/CEP41/KIAA0753/CEP290/BBS9/UNC119/ALMS1/BBIP1/PIBF1/PKD2/FLCN/DYNC2LI1/ZMYND10/IFT140/BBS1/WDR19/BBS4/NEK9/DYNC2H1/SPATA7/GLI3/CPLANE1/EVC/KIZ/EFHC1/LZTFL1/MAK/ZNF423
REACTOME_COSTIMULATION_BY_THE_CD28_FAMILY	REACTOME_COSTIMULATION_BY_THE_CD28_FAMILY	61	0.47704	1.7218	0.000908825	0.0091867	0.00729053	2169	tags=28%, list=18%, signal=23%	ICOS/CTLA4/LCK/PDCD1LG2/HLA-DRB4/CD3G/CD247/CD3D/LYN/CD86/CD3E/CD28/CSK/PDCD1/HLA-DQB1/YES1/GRAP2
REACTOME_TYPE_I_HEMIDESMOSOME_ASSEMBLY	REACTOME_TYPE_I_HEMIDESMOSOME_ASSEMBLY	11	-0.776052	-1.82695	0.000918495	0.00920825	0.00730763	1322	tags=36%, list=11%, signal=33%	CD151/KRT14/LAMA3/COL17A1
REACTOME_IMMUNOREGULATORY_INTERACTIONS_BETWEEN_A_LYMPHOID_AND_A_NON_LYMPHOID_CELL	REACTOME_IMMUNOREGULATORY_INTERACTIONS_BETWEEN_A_LYMPHOID_AND_A_NON_LYMPHOID_CELL	107	0.403515	1.63377	0.000918547	0.00920825	0.00730763	2601	tags=46%, list=21%, signal=36%	ITGB7/IGLV1-44/IGHV3-48/TREM1/SELL/SLAMF7/SIGLEC1/CD3G/LILRB1/CD247/CD3D/IGLV6-57/KIR2DS1/VCAM1/CD40LG/LAIR1/KLRD1/CD8A/KIR2DL3/CD300A/LILRB2/CD96/LILRA4/ITGB2/CD3E/NCR3/ICAM1/SH2D1A/CDH1/CD19/CD33/CD1D/CRTAM/PVR/KLRB1/FCGR2B/HLA-G/CXADR/LAIR2/TYROBP/CD40/MICB/NCR1/HLA-F/LILRA6/KLRF1/PILRA/SFTPD/KIR2DL4
REACTOME_NS1_MEDIATED_EFFECTS_ON_HOST_PATHWAYS	REACTOME_NS1_MEDIATED_EFFECTS_ON_HOST_PATHWAYS	38	0.542607	1.79377	0.000935833	0.00934293	0.00741451	3479	tags=58%, list=28%, signal=42%	ISG15/KPNA2/NUP93/NUP155/SEC13/NUP205/NDC1/NUP62/NUP88/NUP85/NUP50/EIF2AK2/RAE1/NUP42/NUP153/SEH1L/NUP107/KPNA5/NUP37/KPNB1/NUP58/KPNA3
REACTOME_CREATION_OF_C4_AND_C2_ACTIVATORS	REACTOME_CREATION_OF_C4_AND_C2_ACTIVATORS	17	0.695829	1.89834	0.000981913	0.00974309	0.00773207	1209	tags=41%, list=10%, signal=37%	IGLV1-44/IGHV3-48/C1QB/C1QA/IGLV6-57/FCN3/FCN1
REACTOME_INHIBITION_OF_REPLICATION_INITIATION_OF_DAMAGED_DNA_BY_RB1_E2F1	REACTOME_INHIBITION_OF_REPLICATION_INITIATION_OF_DAMAGED_DNA_BY_RB1_E2F1	13	0.733745	1.8797	0.000983947	0.00974309	0.00773207	1107	tags=46%, list=9%, signal=42%	PPP2R3B/E2F1/POLA2/PRIM1/PRIM2/TFDP1
BIOCARTA_DNAFRAGMENT_PATHWAY	BIOCARTA_DNAFRAGMENT_PATHWAY	10	0.799544	1.88463	0.0010065	0.0098857	0.00784525	684	tags=30%, list=6%, signal=28%	TOP2A/GZMB/HMGB2
REACTOME_DNA_DAMAGE_BYPASS	REACTOME_DNA_DAMAGE_BYPASS	42	0.520231	1.75504	0.00100421	0.0098857	0.00784525	1898	tags=43%, list=15%, signal=36%	DTL/ISG15/PCLAF/RFC4/PCNA/POLE2/RFC2/USP1/POLD1/UFD1/RFC3/USP10/UBE2L6/RBX1/POLD2/POLE3/VCP/RPA3
WP_MIR5093P_ALTERATION_OF_YAP1ECM_AXIS	WP_MIR5093P_ALTERATION_OF_YAP1ECM_AXIS	14	-0.730805	-1.87907	0.0010196	0.0099359	0.00788509	912	tags=50%, list=7%, signal=46%	COL1A1/SNAI2/COL3A1/THBS2/COL5A1/EDNRA/SPARC
REACTOME_TP53_REGULATES_TRANSCRIPTION_OF_GENES_INVOLVED_IN_G1_CELL_CYCLE_ARREST	REACTOME_TP53_REGULATES_TRANSCRIPTION_OF_GENES_INVOLVED_IN_G1_CELL_CYCLE_ARREST	12	0.754575	1.86827	0.0010198	0.0099359	0.00788509	454	tags=42%, list=4%, signal=40%	E2F8/CCNA2/CCNE1/CCNE2/E2F1
REACTOME_MITOCHONDRIAL_PROTEIN_IMPORT	REACTOME_MITOCHONDRIAL_PROTEIN_IMPORT	51	0.506937	1.78223	0.00103416	0.0099955	0.00793238	3078	tags=51%, list=25%, signal=38%	CMC2/CYC1/COA4/COQ2/HSPD1/CHCHD2/TOMM22/ACO2/TIMM17A/TIMM44/PITRM1/FXN/CHCHD3/TOMM40/ATP5F1B/SLC25A13/TIMM23/IDH3G/TIMM8A/TOMM70/TIMM17B/SAMM50/TIMM8B/ATP5MC1/TIMM13/CS
REACTOME_REGULATION_OF_INSULIN_LIKE_GROWTH_FACTOR_IGF_TRANSPORT_AND_UPTAKE_BY_INSULIN_LIKE_GROWTH_FACTOR_BINDING_PROTEINS_IGFBPS	REACTOME_REGULATION_OF_INSULIN_LIKE_GROWTH_FACTOR_IGF_TRANSPORT_AND_UPTAKE_BY_INSULIN_LIKE_GROWTH_FACTOR_BINDING_PROTEINS_IGFBPS	110	-0.433002	-1.65347	0.00103231	0.0099955	0.00793238	1741	tags=29%, list=14%, signal=25%	TNC/MIA3/WFS1/PROC/IGFBP7/FSTL3/IGFALS/LAMB1/HRC/SPP2/CTSG/GOLM1/FSTL1/IGFBP2/IGFBP6/MMP2/CHRDL1/GAS6/CST3/VCAN/AFP/ALB/PRSS23/MXRA8/LAMB2/IGFBP4/SPARCL1/FBN1/IGF1/BMP4/MATN3/STC2
REACTOME_INTERLEUKIN_1_FAMILY_SIGNALING	REACTOME_INTERLEUKIN_1_FAMILY_SIGNALING	135	0.373764	1.58058	0.00104721	0.0100815	0.00800065	2503	tags=36%, list=20%, signal=29%	IL1R2/USP18/RIPK2/PSMA7/PSMD3/IRAK1/PSMB9/PSMB5/PSMD7/PSME2/PSMB3/S100A12/PTPN7/PSMA4/PSMB2/PSMA3/PSMA5/PSMB7/PSMD14/IL18RAP/NFKBIB/PSME4/S100B/SEM1/PSMB10/PSMD8/PSMC3/MAP2K1/RBX1/PSMD2/PSMB4/PSMC4/TRAF2/IL1RL2/IL1RAP/IL13/CASP1/PSMA2/PSMB6/PTPN2/NFKBIA/PELI1/IL36G/CUL1/UBE2N/CHUK/PSMD12/PSMA1
BIOCARTA_IL12_PATHWAY	BIOCARTA_IL12_PATHWAY	19	0.673622	1.90646	0.00108163	0.0103717	0.00823092	1013	tags=37%, list=8%, signal=34%	IL12RB2/CD3G/CD247/CD3D/IFNG/CCR5/CD3E
KEGG_DRUG_METABOLISM_CYTOCHROME_P450	KEGG_DRUG_METABOLISM_CYTOCHROME_P450	54	-0.524719	-1.7773	0.0010863	0.0103754	0.00823389	3422	tags=50%, list=28%, signal=36%	UGT2B17/MGST2/FMO4/ALDH1A3/CYP3A4/CYP2E1/CYP2C8/CYP2A7/ALDH3B2/GSTM5/FMO3/CYP2A13/UGT2B15/CYP2A6/GSTZ1/AOX1/GSTM4/ADH1C/GSTM2/GSTM1/GSTT2/GSTT1/MAOA/GSTM3/MAOB/ADH1B/FMO5
REACTOME_SIGNALING_BY_NOTCH4	REACTOME_SIGNALING_BY_NOTCH4	78	0.443569	1.69762	0.00109728	0.0104392	0.00828454	2607	tags=37%, list=21%, signal=30%	TACC3/PSMA7/PSMD3/PSMB9/PSMB5/PSMD7/PSME2/PSMB3/PSMA4/PSMB2/PSMA3/PSMA5/PSMB7/PSMD14/YWHAZ/SEM1/PSMB10/PSMD8/PSMC3/RBX1/PSMD2/PSMB4/PSMC4/PSMA2/PSMB6/CUL1/PSMD12/PSMA1/PSMD10
KEGG_ANTIGEN_PROCESSING_AND_PRESENTATION	KEGG_ANTIGEN_PROCESSING_AND_PRESENTATION	74	0.440425	1.66957	0.00110284	0.0104511	0.00829396	3271	tags=51%, list=26%, signal=38%	TAP1/KLRC3/HLA-DRB4/HLA-DOB/IFI30/KIR2DS1/CTSS/KLRD1/CD8A/KIR2DL3/LGMN/KLRC4/PSME2/KIR2DS5/CTSL/KIR3DL3/TAP2/IFNA21/LTA/HLA-DQB1/RFXANK/HLA-G/HSPA6/HLA-F/KIR2DL4/HLA-DMB/CALR/PDIA3/HLA-DMA/HSP90AB1/CTSB/HLA-DRA/HLA-B/CD8B/HSPA5/IFNA1/CD4/KIR2DL2
REACTOME_TNF_RECEPTOR_SUPERFAMILY_TNFSF_MEMBERS_MEDIATING_NON_CANONICAL_NF_KB_PATHWAY	REACTOME_TNF_RECEPTOR_SUPERFAMILY_TNFSF_MEMBERS_MEDIATING_NON_CANONICAL_NF_KB_PATHWAY	14	0.731581	1.913	0.00117409	0.011083	0.00879543	2092	tags=57%, list=17%, signal=48%	TNFRSF11A/BIRC3/LTB/CD40LG/LTA/LTBR/TRAF2/CD40
WP_PI3KAKT_SIGNALING_PATHWAY	WP_PI3KAKT_SIGNALING_PATHWAY	309	-0.34181	-1.47305	0.00122034	0.0114749	0.00910646	1968	tags=25%, list=16%, signal=21%	PGF/VEGFC/TP53/BDNF/FGF7/THBS3/G6PC3/PRKAA2/PIK3R1/STK11/COL4A6/TEK/LAMA4/TNC/HGF/COL6A1/MYB/KDR/CDKN1B/CREB3L1/IFNA4/INSR/CHRM2/FLT3/EIF4B/VWF/BCL2/ITGAV/EFNA1/F2R/COL2A1/NGFR/ITGA3/CCND1/FGFR3/TSC1/FGF1/NGF/FGF14/LAMB1/LPAR1/COL1A2/COL1A1/LPAR4/EPOR/COL6A3/FGF2/GNG12/PRLR/THBS2/LPAR6/PDGFC/ITGB5/KITLG/IGF1R/NTF3/PDGFRB/COL6A2/LAMA2/GHR/LAMA3/FGF18/NTRK2/IKBKB/GNG11/TNN/LAMB2/IRS1/COL4A5/ITGA7/T…
REACTOME_INTEGRATION_OF_ENERGY_METABOLISM	REACTOME_INTEGRATION_OF_ENERGY_METABOLISM	99	-0.448712	-1.68275	0.00122587	0.0114825	0.00911244	2803	tags=32%, list=23%, signal=25%	PLCB1/PRKAG2/ITPR2/ADCY9/GNG7/CACNB2/GNB5/CACNA1E/ADCY1/GNAQ/PRKAA2/ADCY2/STK11/ACSL3/CD36/VAMP2/KCNS3/GNA14/RAPGEF3/STXBP1/PRKAR2B/GNG12/ABCC8/CACNA1C/ACACB/RAPGEF4/GNG11/ADRA2A/CACNA2D2/CACNA1D/ADIPOQ/ITPR1
REACTOME_INTERLEUKIN_12_SIGNALING	REACTOME_INTERLEUKIN_12_SIGNALING	40	0.54843	1.84308	0.00123373	0.0115117	0.00913561	3422	tags=52%, list=28%, signal=38%	LMNB1/IL12RB2/SNRPA1/RALA/IFNG/PSME2/MTAP/LCP1/TALDO1/MIF/MSN/P4HB/IL12B/IL12A/GSTO1/CA1/HNRNPF/AIP/STAT4/HNRNPA2B1/VAMP7
REACTOME_RESOLUTION_OF_D_LOOP_STRUCTURES_THROUGH_SYNTHESIS_DEPENDENT_STRAND_ANNEALING_SDSA	REACTOME_RESOLUTION_OF_D_LOOP_STRUCTURES_THROUGH_SYNTHESIS_DEPENDENT_STRAND_ANNEALING_SDSA	26	0.608596	1.86811	0.00124331	0.0115566	0.00917128	2166	tags=50%, list=18%, signal=41%	RAD51AP1/EXO1/RAD51/BLM/DNA2/BRIP1/RMI1/SEM1/NBN/XRCC3/BARD1/BRCA1/BRCA2
BIOCARTA_CASPASE_PATHWAY	BIOCARTA_CASPASE_PATHWAY	22	0.63848	1.88466	0.00136699	0.012595	0.00999535	2383	tags=41%, list=19%, signal=33%	GZMB/LMNB1/PRF1/LMNB2/BIRC3/PARP1/CASP10/CASP1/CASP2
BIOCARTA_TH1TH2_PATHWAY	BIOCARTA_TH1TH2_PATHWAY	20	0.653103	1.88175	0.00136912	0.012595	0.00999535	2557	tags=55%, list=21%, signal=44%	IL12RB2/IL2RA/HLA-DRB4/IFNG/CD40LG/CD86/CD28/CD40/IL12B/IL2/IL12A
WP_THYMIC_STROMAL_LYMPHOPOIETIN_TSLP_SIGNALING_PATHWAY	WP_THYMIC_STROMAL_LYMPHOPOIETIN_TSLP_SIGNALING_PATHWAY	46	0.508703	1.74849	0.0013706	0.012595	0.00999535	2288	tags=39%, list=19%, signal=32%	CXCL8/EIF4EBP1/LCK/IL2RA/STAT1/MYC/HCK/IL7R/LYN/MAP2K1/CRLF2/IL6/RELB/YES1/MAP2K2/CCL11/MAPK1/NFKBIA
REACTOME_NUCLEAR_PORE_COMPLEX_NPC_DISASSEMBLY	REACTOME_NUCLEAR_PORE_COMPLEX_NPC_DISASSEMBLY	33	0.563991	1.83772	0.00140795	0.0128894	0.010229	2741	tags=48%, list=22%, signal=38%	CCNB2/CDK1/CCNB1/NUP93/NUP155/SEC13/NUP205/NDC1/NUP62/NUP88/NUP85/NUP50/RAE1/NUP42/NUP153/SEH1L
REACTOME_GENE_SILENCING_BY_RNA	REACTOME_GENE_SILENCING_BY_RNA	83	0.437342	1.68122	0.00143176	0.0130092	0.010324	3655	tags=48%, list=30%, signal=34%	MYBL1/TDRD12/H2AZ1/H2BC12/NUP93/H2BC11/H3C10/POLR2F/NUP155/H2BC9/POLR2K/SEC13/NUP205/H2BC3/NDC1/H2AX/NUP62/DDX4/POLR2D/RAN/NUP88/NUP85/NUP50/H2AC4/RAE1/NUP42/H2AC14/POLR2H/NUP153/SEH1L/NUP107/AGO3/NUP37/POLR2J/NUP58/TDRD1/AGO1/POLR2B/ELAC2/HSP90AA1
KEGG_PROGESTERONE_MEDIATED_OOCYTE_MATURATION	KEGG_PROGESTERONE_MEDIATED_OOCYTE_MATURATION	74	0.434019	1.64528	0.00142743	0.0130092	0.010324	894	tags=18%, list=7%, signal=16%	CCNB2/CCNA2/CDK1/MAD2L1/CCNB1/CDC25A/PLK1/CDC25B/BUB1/ADCY8/PRKX/PKMYT1/CDC25C
WP_MIRNAS_INVOLVEMENT_IN_THE_IMMUNE_RESPONSE_IN_SEPSIS	WP_MIRNAS_INVOLVEMENT_IN_THE_IMMUNE_RESPONSE_IN_SEPSIS	36	0.55587	1.82081	0.00156122	0.0141326	0.0112156	2805	tags=50%, list=23%, signal=39%	GZMB/CXCL8/LCN2/TLR8/CCL4/IRAK1/VCAM1/ELANE/ICAM1/IRF1/TNF/IL6/RELB/NFKBIA/CHUK/IRF5/MAPK14/IL1A
REACTOME_GENE_AND_PROTEIN_EXPRESSION_BY_JAK_STAT_SIGNALING_AFTER_INTERLEUKIN_12_STIMULATION	REACTOME_GENE_AND_PROTEIN_EXPRESSION_BY_JAK_STAT_SIGNALING_AFTER_INTERLEUKIN_12_STIMULATION	31	0.574735	1.83602	0.0015978	0.0144099	0.0114356	3381	tags=52%, list=27%, signal=38%	LMNB1/SNRPA1/RALA/IFNG/PSME2/MTAP/LCP1/TALDO1/MIF/MSN/GSTO1/CA1/HNRNPF/AIP/STAT4/HNRNPA2B1
KEGG_TOLL_LIKE_RECEPTOR_SIGNALING_PATHWAY	KEGG_TOLL_LIKE_RECEPTOR_SIGNALING_PATHWAY	97	0.415521	1.6629	0.00162546	0.014605	0.0115905	2802	tags=35%, list=23%, signal=27%	CXCL10/CXCL11/CXCL9/CXCL8/CCL5/STAT1/TLR8/CCL4/IRAK1/CD86/TLR1/SPP1/LBP/MAPK13/CD14/IFNA21/MAP2K1/TNF/IL6/TLR2/FADD/MAP2K2/CD40/MAPK1/NFKBIA/IKBKE/IL12B/CHUK/IL12A/MAPK12/TLR6/MAP2K3/IRF5/MAPK14
REACTOME_HIV_LIFE_CYCLE	REACTOME_HIV_LIFE_CYCLE	134	0.375807	1.58795	0.00163354	0.0146235	0.0116051	3299	tags=40%, list=27%, signal=30%	HMGA1/TAF13/FEN1/NUP93/GTF2A1/RANBP1/POLR2F/ELOA2/RCC1/NUP155/CCR5/PSIP1/TAF2/POLR2K/SEC13/NUP205/ELOC/NDC1/BANF1/NUP62/RANGAP1/SSRP1/CXCR4/NELFCD/POLR2D/RAN/VPS37B/NUP88/NUP85/NUP50/TAF11/TAF4B/RAE1/NUP42/RNGTT/LIG1/TAF7L/NCBP1/GTF2E1/POLR2H/GTF2A2/NUP153/CCNT1/ELOA/RNMT/SEH1L/NUP107/ELL/XPO1/NUP37/NMT2/CD4/POLR2J/NUP58
REACTOME_DEGRADATION_OF_THE_EXTRACELLULAR_MATRIX	REACTOME_DEGRADATION_OF_THE_EXTRACELLULAR_MATRIX	121	-0.415201	-1.6055	0.00164524	0.0146741	0.0116453	1914	tags=35%, list=15%, signal=30%	CAPN3/CAPN10/COL4A6/NID1/COL6A1/CAST/COL11A1/COL18A1/COL2A1/COL15A1/MMP3/LAMB1/MMP13/COL1A2/CTSG/COL1A1/TMPRSS6/COL6A3/COL8A1/COL3A1/COL5A3/MMP10/COL5A2/CTSK/ADAMTS5/MMP2/COL7A1/HSPG2/COL5A1/COL6A2/LAMA3/COL8A2/HTRA1/COL10A1/FBN1/DCN/TPSAB1/COL4A5/ELN/COL14A1/COL16A1/COL17A1
REACTOME_HDR_THROUGH_SINGLE_STRAND_ANNEALING_SSA	REACTOME_HDR_THROUGH_SINGLE_STRAND_ANNEALING_SSA	33	0.559488	1.82305	0.00166989	0.0148394	0.0117765	2507	tags=48%, list=20%, signal=39%	EXO1/RAD51/RFC4/BLM/DNA2/RFC2/BRIP1/ERCC4/RMI1/RFC3/NBN/BARD1/RPA3/BRCA1/RAD1/RFC5
REACTOME_TRANSCRIPTIONAL_REGULATION_BY_E2F6	REACTOME_TRANSCRIPTIONAL_REGULATION_BY_E2F6	30	0.579589	1.84391	0.00172175	0.0152444	0.0120979	581	tags=20%, list=5%, signal=19%	RRM2/EZH2/CHEK1/RAD51/E2F1/CDC7
BIOCARTA_CELLCYCLE_PATHWAY	BIOCARTA_CELLCYCLE_PATHWAY	23	0.618973	1.83938	0.00173197	0.0152791	0.0121254	1107	tags=39%, list=9%, signal=36%	CDK1/CCNB1/CDC25A/CCNE1/E2F1/CDKN2A/CDKN2C/CDK4/TFDP1
WP_INTERACTIONS_OF_NATURAL_KILLER_CELLS_IN_PANCREATIC_CANCER	WP_INTERACTIONS_OF_NATURAL_KILLER_CELLS_IN_PANCREATIC_CANCER	21	0.641189	1.85486	0.00176546	0.0155182	0.0123151	2307	tags=62%, list=19%, signal=50%	GZMB/CCL5/PRF1/CCL2/MYC/CCL4/IFNG/CD96/NCR3/TNF/PVR/MICB/NCR1
WP_TRYPTOPHAN_CATABOLISM_LEADING_TO_NAD_PRODUCTION	WP_TRYPTOPHAN_CATABOLISM_LEADING_TO_NAD_PRODUCTION	11	0.76527	1.85093	0.00179157	0.0155783	0.0123629	679	tags=45%, list=5%, signal=43%	QPRT/IDO1/TDO2/KMO/KYNU
REACTOME_EXPORT_OF_VIRAL_RIBONUCLEOPROTEINS_FROM_NUCLEUS	REACTOME_EXPORT_OF_VIRAL_RIBONUCLEOPROTEINS_FROM_NUCLEUS	30	0.577899	1.83853	0.00178755	0.0155783	0.0123629	3299	tags=60%, list=27%, signal=44%	NUP93/NUP155/SEC13/NUP205/NDC1/NUP62/RAN/NUP88/NUP85/NUP50/RAE1/NUP42/NUP153/SEH1L/NUP107/XPO1/NUP37/NUP58
KEGG_NATURAL_KILLER_CELL_MEDIATED_CYTOTOXICITY	KEGG_NATURAL_KILLER_CELL_MEDIATED_CYTOTOXICITY	118	0.386691	1.5887	0.00178983	0.0155783	0.0123629	3271	tags=42%, list=26%, signal=31%	GZMB/LCK/PRF1/KLRC3/CD247/KIR2DS1/IFNG/PLCG2/KLRD1/KIR2DL3/ULBP2/KIR2DS5/BID/ITGB2/NCR3/ICAM1/SH2D1A/CD48/LCP2/FCER1G/RAC2/IFNA21/SYK/MAP2K1/TNF/HLA-G/FASLG/TYROBP/MAP2K2/FCGR3B/MAPK1/SOS1/MICB/NCR1/PRKCA/NRAS/PRKCG/KIR2DL4/NFATC3/CD244/CASP3/TNFRSF10B/PAK1/HLA-B/IFNAR2/PPP3R1/PRKCB/GRB2/IFNA1/KIR2DL2
WP_MICROGLIA_PATHOGEN_PHAGOCYTOSIS_PATHWAY	WP_MICROGLIA_PATHOGEN_PHAGOCYTOSIS_PATHWAY	37	0.53357	1.74883	0.00180006	0.0155963	0.0123771	2072	tags=46%, list=17%, signal=38%	TREM1/C1QB/C1QA/HCK/LYN/CYBA/PLCG2/NCF2/ITGB2/FCER1G/NCF4/RAC2/SYK/ARPC1B/CYBB/NCKAP1L/TYROBP
PID_CXCR3_PATHWAY	PID_CXCR3_PATHWAY	41	0.531703	1.78655	0.00180858	0.0156143	0.0123914	49	tags=10%, list=0%, signal=10%	CXCL10/CXCL13/CXCL11/CXCL9
WP_1Q211_COPY_NUMBER_VARIATION_SYNDROME	WP_1Q211_COPY_NUMBER_VARIATION_SYNDROME	24	-0.622852	-1.8205	0.00182972	0.0157408	0.0124918	2738	tags=58%, list=22%, signal=45%	PRKAG2/TJP1/PRKAA1/GJA5/CTNNB1/BCL9/GJA8/PRKAA2/PRKAB1/OCLN/ACP6/TJP3/GJA1/FMO5
BIOCARTA_STATHMIN_PATHWAY	BIOCARTA_STATHMIN_PATHWAY	19	0.657934	1.86206	0.00190571	0.0162908	0.0129283	1273	tags=47%, list=10%, signal=43%	CDK1/CCNB1/CD2/CD3G/STMN1/CD247/CD3D/CD3E/MAPK13
WP_DNA_MISMATCH_REPAIR	WP_DNA_MISMATCH_REPAIR	21	0.638717	1.84771	0.00191	0.0162908	0.0129283	2507	tags=67%, list=20%, signal=53%	EXO1/RFC4/PCNA/POLE2/MSH2/RFC2/MSH6/POLD1/RFC3/POLD2/POLE3/RPA3/LIG1/RFC5
PID_INTEGRIN4_PATHWAY	PID_INTEGRIN4_PATHWAY	11	-0.752385	-1.77123	0.0019138	0.0162908	0.0129283	1119	tags=45%, list=9%, signal=41%	LAMC1/LAMB1/LAMA2/LAMA3/LAMB2
REACTOME_FCGR_ACTIVATION	REACTOME_FCGR_ACTIVATION	15	0.697658	1.85169	0.0019513	0.0164542	0.013058	558	tags=47%, list=5%, signal=45%	IGLV1-44/IGHV3-48/HCK/CD3G/CD247/IGLV6-57/LYN
REACTOME_RESOLUTION_OF_AP_SITES_VIA_THE_MULTIPLE_NUCLEOTIDE_PATCH_REPLACEMENT_PATHWAY	REACTOME_RESOLUTION_OF_AP_SITES_VIA_THE_MULTIPLE_NUCLEOTIDE_PATCH_REPLACEMENT_PATHWAY	23	0.611347	1.81672	0.00196013	0.0164542	0.013058	2620	tags=65%, list=21%, signal=51%	FEN1/RFC4/PCNA/POLE2/RFC2/POLD1/RFC3/PARP1/POLD2/POLE3/RPA3/LIG1/RFC5/PARP2/APEX1
WP_HYPOTHESIZED_PATHWAYS_IN_PATHOGENESIS_OF_CARDIOVASCULAR_DISEASE	WP_HYPOTHESIZED_PATHWAYS_IN_PATHOGENESIS_OF_CARDIOVASCULAR_DISEASE	24	-0.621047	-1.81523	0.00195925	0.0164542	0.013058	2153	tags=42%, list=17%, signal=34%	MAPK3/SMAD3/RUNX2/CCN2/TGFBR2/LTBP2/POSTN/AGTR1/FBN1/TGFBR3
REACTOME_METABOLISM_OF_FOLATE_AND_PTERINES	REACTOME_METABOLISM_OF_FOLATE_AND_PTERINES	12	0.730092	1.80765	0.00194871	0.0164542	0.013058	1457	tags=50%, list=12%, signal=44%	MTHFD2/SHMT2/DHFR/MTHFD1/SLC25A32/SLC19A1
KEGG_HYPERTROPHIC_CARDIOMYOPATHY_HCM	KEGG_HYPERTROPHIC_CARDIOMYOPATHY_HCM	77	-0.460305	-1.65282	0.0019786	0.016552	0.0131356	2827	tags=36%, list=23%, signal=28%	ITGA10/PRKAG2/ITGA8/SLC8A1/ITGA1/TPM2/CACNB2/PRKAA1/TNNT2/CACNG5/SGCB/PRKAA2/PRKAB1/ITGAV/TPM1/ITGA3/TGFB2/CACNA2D3/CACNG4/SGCD/ITGB5/CACNA1C/LAMA2/TGFB3/ITGA7/IGF1/CACNA2D2/CACNA1D
REACTOME_TRANSPORT_OF_THE_SLBP_DEPENDANT_MATURE_MRNA	REACTOME_TRANSPORT_OF_THE_SLBP_DEPENDANT_MATURE_MRNA	33	0.552401	1.79995	0.00199732	0.0166512	0.0132143	3299	tags=58%, list=27%, signal=42%	NUP93/SLBP/NUP155/SEC13/NUP205/NDC1/NUP62/NUP88/NUP85/NUP50/RAE1/NUP42/NCBP1/NUP153/SEH1L/EIF4E/NUP107/NUP37/NUP58
REACTOME_CONVERSION_FROM_APC_C_CDC20_TO_APC_C_CDH1_IN_LATE_ANAPHASE	REACTOME_CONVERSION_FROM_APC_C_CDC20_TO_APC_C_CDH1_IN_LATE_ANAPHASE	14	0.722456	1.88914	0.00201124	0.0167099	0.0132609	52	tags=21%, list=0%, signal=21%	CDC20/UBE2C/UBE2S
KEGG_SYSTEMIC_LUPUS_ERYTHEMATOSUS	KEGG_SYSTEMIC_LUPUS_ERYTHEMATOSUS	77	0.428008	1.63309	0.00202304	0.0167505	0.0132932	2508	tags=44%, list=20%, signal=35%	C1QB/C1QA/HLA-DRB4/HLA-DOB/H2AZ1/H2BC12/MACROH2A2/H2BC11/H3C10/IFNG/CD40LG/SNRPD3/H2AW/CD86/H2AC17/SNRPD1/ELANE/CD28/H2BC9/H2BC3/SNRPB/H2AX/TNF/HLA-DQB1/H3-4/C8G/FCGR2B/CD40/FCGR3B/H2AC4/ACTN2/H2AC14/FCGR2C/C9
KEGG_PYRIMIDINE_METABOLISM	KEGG_PYRIMIDINE_METABOLISM	75	0.433435	1.64405	0.00206455	0.0170361	0.0135198	2146	tags=36%, list=17%, signal=30%	RRM2/CTPS1/TK1/UPP1/TYMS/NME1/PNP/POLE2/POLA2/DTYMK/TXNRD1/POLR2F/PRIM1/DPYS/UPB1/PRIM2/POLD1/DCK/POLR2K/NT5C2/TYMP/POLD2/POLR2D/POLE3/UMPS/RRM1/POLR3G
REACTOME_RESOLUTION_OF_D_LOOP_STRUCTURES	REACTOME_RESOLUTION_OF_D_LOOP_STRUCTURES	28	0.597177	1.87104	0.00210011	0.0172708	0.013706	2166	tags=46%, list=18%, signal=38%	RAD51AP1/EXO1/RAD51/BLM/DNA2/BRIP1/RMI1/SEM1/NBN/XRCC3/BARD1/BRCA1/BRCA2
REACTOME_TELOMERE_C_STRAND_LAGGING_STRAND_SYNTHESIS	REACTOME_TELOMERE_C_STRAND_LAGGING_STRAND_SYNTHESIS	31	0.566009	1.80814	0.00217079	0.0177917	0.0141194	1898	tags=45%, list=15%, signal=38%	DSCC1/FEN1/RFC4/PCNA/BLM/DNA2/POLA2/RFC2/PRIM1/PRIM2/POLD1/RFC3/POLD2/RPA3
WP_DNA_REPAIR_PATHWAYS_FULL_NETWORK	WP_DNA_REPAIR_PATHWAYS_FULL_NETWORK	108	0.385896	1.56909	0.00227968	0.0186212	0.0147777	2620	tags=35%, list=21%, signal=28%	CHEK1/FANCI/EXO1/RAD51/FANCA/FEN1/RFC4/PCNA/NEIL3/FANCE/POLE2/MSH2/RFC2/MSH6/USP1/POLD1/BRIP1/UNG/ERCC4/FANCG/RFC3/NBN/PARP1/H2AX/RBX1/POLD2/POLE3/RPA3/BRCA1/TDG/BRCA2/DDB1/PRKDC/LIG1/RAD51C/RFC5/PARP2/APEX1
WP_ATM_SIGNALING_PATHWAY	WP_ATM_SIGNALING_PATHWAY	39	0.526076	1.75575	0.00234807	0.018925	0.0150188	1622	tags=28%, list=13%, signal=25%	CDK1/CHEK1/CCNB1/CDC25A/RAD51/CCNE1/CDC25C/BID/CHEK2/NBN/H2AX
REACTOME_RESOLUTION_OF_ABASIC_SITES_AP_SITES	REACTOME_RESOLUTION_OF_ABASIC_SITES_AP_SITES	34	0.534102	1.73118	0.00234164	0.018925	0.0150188	2620	tags=50%, list=21%, signal=40%	FEN1/RFC4/PCNA/POLE2/RFC2/POLD1/UNG/RFC3/PARP1/POLD2/POLE3/RPA3/TDG/LIG1/RFC5/PARP2/APEX1
WP_ALLOGRAFT_REJECTION	WP_ALLOGRAFT_REJECTION	82	0.412339	1.58067	0.00232781	0.018925	0.0150188	805	tags=20%, list=7%, signal=18%	CXCL13/CXCL11/CXCL9/GZMB/GNLY/CXCL8/CTLA4/C1QB/PRF1/IL2RA/STAT1/C1QA/HLA-DOB/IFNG/CD40LG/CD86
REACTOME_CLASS_I_MHC_MEDIATED_ANTIGEN_PROCESSING_PRESENTATION	REACTOME_CLASS_I_MHC_MEDIATED_ANTIGEN_PROCESSING_PRESENTATION	293	0.301446	1.4013	0.00233399	0.018925	0.0150188	2783	tags=30%, list=23%, signal=24%	CDC20/S100A9/S100A8/UBE2C/UBE2S/CTSV/TAP1/GAN/SKP2/PSMA7/PSMD3/PSMB9/UBE2O/HERC5/PSMB5/CYBA/CTSS/PSMD7/HERC6/NCF2/SEC61G/PSME2/PSMB3/SEC61A2/PSMA4/UBE2V2/TLR1/PSMB2/PSMA3/PSMA5/PSMB7/CTSL/VHL/PSMD14/PSME4/MRC1/NCF4/SEM1/TAP2/SEC13/PSMB10/CCNF/PSMD8/CD14/ELOC/UBE2L6/RNF114/PSMC3/RBX1/SEC61B/TLR2/PSMD2/ITCH/PSMB4/ANAPC10/PSMC4/CYBB/HLA-G/SOCS3/KLHL5/PSMA2/UBE2A/FBXL8/CD207/PSMB6/LRRC41/UBE2D1/HLA-F…
SA_REG_CASCADE_OF_CYCLIN_EXPR	SA_REG_CASCADE_OF_CYCLIN_EXPR	13	0.709903	1.81863	0.00238487	0.0191579	0.0152037	946	tags=46%, list=8%, signal=43%	CCNA2/CCNE1/CCNE2/E2F1/CDKN2A/CDK4
KEGG_GRAFT_VERSUS_HOST_DISEASE	KEGG_GRAFT_VERSUS_HOST_DISEASE	33	0.548236	1.78638	0.00243496	0.0194389	0.0154266	3722	tags=79%, list=30%, signal=55%	GZMB/PRF1/HLA-DRB4/HLA-DOB/IFNG/KLRD1/KIR2DL3/CD86/CD28/TNF/IL6/HLA-DQB1/HLA-G/FASLG/HLA-F/IL2/HLA-DMB/HLA-DMA/IL1A/HLA-DRA/HLA-B/KIR2DL2/HLA-C/HLA-DOA/CD80/HLA-A
REACTOME_SIGNALING_BY_PDGF	REACTOME_SIGNALING_BY_PDGF	55	-0.502253	-1.70687	0.00243927	0.0194389	0.0154266	2504	tags=40%, list=20%, signal=32%	THBS1/COL9A2/RASA1/THBS3/PIK3R1/STAT6/COL6A1/STAT5A/COL2A1/COL6A3/COL3A1/COL5A3/COL5A2/THBS2/PDGFC/PDGFRB/COL5A1/COL6A2/PLAT/COL4A5/THBS4/PDGFD
REACTOME_DISORDERS_OF_TRANSMEMBRANE_TRANSPORTERS	REACTOME_DISORDERS_OF_TRANSMEMBRANE_TRANSPORTERS	156	0.34796	1.49287	0.00244388	0.0194389	0.0154266	2789	tags=38%, list=23%, signal=30%	SLC12A1/CP/PSMA7/NUP93/PSMD3/SLC39A4/SLC5A7/PSMB9/PSMB5/PSMD7/DERL1/PSME2/PSMB3/SLC6A14/PSMA4/NUP155/PSMB2/PSMA3/PSMA5/PSMB7/PSMD14/SLC2A1/PSME4/SEM1/SEC13/ABCD1/ABCC2/NUP205/PSMB10/PSMD8/SLC16A1/NDC1/SLC7A7/PSMC3/NUP62/PSMD2/PSMB4/AVP/VCP/PSMC4/SLCO1B3/NUP88/NUP85/CFTR/PSMA2/ABCB6/NUP50/PSMB6/RAE1/NUP42/PSMD12/PSMA1/SLC3A2/PSMD10/NUP153/ABCB11/SEH1L/SLC35A2/PSMD1/ABCG5
REACTOME_HEDGEHOG_ON_STATE	REACTOME_HEDGEHOG_ON_STATE	74	0.422885	1.60308	0.00249577	0.0197868	0.0157027	2607	tags=43%, list=21%, signal=34%	PSMA7/PSMD3/PSMB9/PSMB5/PSMD7/PSME2/PSMB3/PSMA4/PSMB2/PSMA3/PSMA5/PSMB7/PSMD14/IHH/ARRB2/PSME4/SEM1/PSMB10/PSMD8/PSMC3/RBX1/PSMD2/ITCH/PSMB4/GPR161/PSMC4/PSMA2/PSMB6/PSMD12/PSMA1/CDC73/PSMD10
WP_MODULATORS_OF_TCR_SIGNALING_AND_T_CELL_ACTIVATION	WP_MODULATORS_OF_TCR_SIGNALING_AND_T_CELL_ACTIVATION	58	0.455765	1.6362	0.00255671	0.0202038	0.0160337	1308	tags=26%, list=11%, signal=23%	LCK/UBASH3A/CD3G/CD247/CD3D/MAP4K1/DGKZ/ITK/CD8A/CD3E/SH2D1A/LCP2/CD28/TNFAIP3/PRKCQ
BIOCARTA_SET_PATHWAY	BIOCARTA_SET_PATHWAY	10	0.764705	1.80251	0.00266385	0.0209822	0.0166514	684	tags=40%, list=6%, signal=38%	GZMB/PRF1/GZMA/HMGB2
WP_KYNURENINE_PATHWAY_AND_LINKS_TO_CELL_SENESCENCE	WP_KYNURENINE_PATHWAY_AND_LINKS_TO_CELL_SENESCENCE	18	0.663885	1.84695	0.00268289	0.0210504	0.0167055	679	tags=39%, list=5%, signal=37%	IL1R2/QPRT/IDO1/TDO2/KMO/IFNG/KYNU
REACTOME_ATF4_ACTIVATES_GENES_IN_RESPONSE_TO_ENDOPLASMIC_RETICULUM_STRESS	REACTOME_ATF4_ACTIVATES_GENES_IN_RESPONSE_TO_ENDOPLASMIC_RETICULUM_STRESS	25	0.57672	1.75715	0.00268987	0.0210504	0.0167055	1980	tags=44%, list=16%, signal=37%	CXCL8/ASNS/CCL2/CEBPG/CEBPB/EXOSC4/ATF3/EXOSC9/ATF4/EXOSC2/EXOSC5
WP_VITAMIN_D_RECEPTOR_PATHWAY	WP_VITAMIN_D_RECEPTOR_PATHWAY	149	0.348341	1.48863	0.00275311	0.0214761	0.0170433	1385	tags=23%, list=11%, signal=21%	S100A9/KRT16/S100A8/CAMP/ORM1/CBS/CCNE1/HSD17B2/CTLA4/TREM1/CA9/PRDM1/MYC/CDKAL1/CDKN2A/TRPV6/S100A2/KLK6/CYP27B1/CDKN2C/MX2/S100G/ADGRE5/G6PD/IRF8/HILPDA/CASP5/SPP1/CST1/TNFAIP3/PRKCQ/LGALS9/ABCD1/ADRA1B
REACTOME_REGULATION_OF_GLUCOKINASE_BY_GLUCOKINASE_REGULATORY_PROTEIN	REACTOME_REGULATION_OF_GLUCOKINASE_BY_GLUCOKINASE_REGULATORY_PROTEIN	30	0.564338	1.79539	0.00279927	0.0217661	0.0172735	3299	tags=57%, list=27%, signal=42%	NUP93/NUP155/SEC13/NUP205/NDC1/NUP62/NUP88/NUP85/NUP50/RAE1/NUP42/NUP153/SEH1L/GCKR/NUP107/NUP37/NUP58
REACTOME_TRANSCRIPTIONAL_REGULATION_BY_RUNX3	REACTOME_TRANSCRIPTIONAL_REGULATION_BY_RUNX3	92	0.401716	1.58752	0.00281452	0.0218148	0.0173121	2607	tags=35%, list=21%, signal=28%	MYC/PSMA7/PSMD3/CDKN2A/PSMB9/PSMB5/RUNX3/PSMD7/PSME2/PSMB3/PSMA4/PSMB2/PSMA3/PSMA5/PSMB7/PSMD14/SPP1/TEAD4/SEM1/CBFB/PSMB10/PSMD8/PSMC3/PSMD2/PSMB4/PSMC4/PSMA2/PSMB6/BCL2L11/PSMD12/PSMA1/PSMD10
REACTOME_PERK_REGULATES_GENE_EXPRESSION	REACTOME_PERK_REGULATES_GENE_EXPRESSION	30	0.563407	1.79243	0.00288743	0.0223086	0.017704	1980	tags=40%, list=16%, signal=34%	CXCL8/ASNS/CCL2/CEBPG/CEBPB/EIF2S2/EXOSC4/ATF3/EXOSC9/ATF4/EXOSC2/EXOSC5
WP_AEROBIC_GLYCOLYSIS	WP_AEROBIC_GLYCOLYSIS	12	0.717652	1.77685	0.00290199	0.0223499	0.0177368	1376	tags=58%, list=11%, signal=52%	GPI/TPI1/GAPDH/PGK1/ENO1/SLC2A1/PKM
REACTOME_ADRENALINE_NORADRENALINE_INHIBITS_INSULIN_SECRETION	REACTOME_ADRENALINE_NORADRENALINE_INHIBITS_INSULIN_SECRETION	22	-0.62951	-1.79761	0.00296615	0.0227506	0.0180548	632	tags=27%, list=5%, signal=26%	GNG12/CACNA1C/GNG11/ADRA2A/CACNA2D2/CACNA1D
WP_HEPATITIS_C_AND_HEPATOCELLULAR_CARCINOMA	WP_HEPATITIS_C_AND_HEPATOCELLULAR_CARCINOMA	49	0.488353	1.69702	0.00297277	0.0227506	0.0180548	468	tags=14%, list=4%, signal=14%	MMP1/RRM2/BIRC5/CXCL8/UCHL1/MYC/BIRC3
REACTOME_THE_CITRIC_ACID_TCA_CYCLE_AND_RESPIRATORY_ELECTRON_TRANSPORT	REACTOME_THE_CITRIC_ACID_TCA_CYCLE_AND_RESPIRATORY_ELECTRON_TRANSPORT	140	0.360581	1.52747	0.00301771	0.0230219	0.0182701	3943	tags=51%, list=32%, signal=35%	PDK1/ME1/NDUFAF4/LDHB/LDHC/CYC1/ME2/IDH2/COX5A/CYCS/SCO2/SLC16A3/NDUFS6/NDUFA9/ACO2/DLAT/UQCR10/UQCRFS1/IDH3A/SLC16A1/PPARD/PDHA1/PDK3/NDUFS5/ATP5MC3/NDUFV1/ATP5MF/ATP5F1B/ETFA/COX7B/NDUFB2/FH/COA1/NDUFA6/ATP5F1C/IDH3G/TRAP1/NDUFB11/MPC2/COX8A/PDHA2/LDHA/COX5B/PDHX/NDUFS1/TACO1/NDUFA4/NDUFA8/ATP5MC1/NDUFA1/COX6B1/CS/SDHA/NDUFB6/NDUFS3/MDH2/NDUFB5/ATP5PF/COX6A1/UQCRB/NDUFB4/UQCRC1/ATP5PD/UCP2/PDPR…
KEGG_T_CELL_RECEPTOR_SIGNALING_PATHWAY	KEGG_T_CELL_RECEPTOR_SIGNALING_PATHWAY	105	0.38915	1.57268	0.00303764	0.0231013	0.0183331	3174	tags=42%, list=26%, signal=31%	ICOS/CTLA4/LCK/CD3G/CD247/CD3D/IFNG/CD40LG/ITK/CD8A/CBL/CDK4/PTPRC/CD3E/LCP2/CD28/NFKBIB/MAPK13/PRKCQ/NCK1/MAP2K1/NFKBIE/TNF/PDCD1/NCK2/RASGRP1/MAP2K2/GRAP2/MAPK1/SOS1/NFKBIA/NRAS/CHUK/IL2/GSK3B/MAPK12/NFATC3/MAPK14/TEC/MAP3K8/PAK1/CD8B/PPP3R1/GRB2
PID_IL12_STAT4_PATHWAY	PID_IL12_STAT4_PATHWAY	32	0.556912	1.80327	0.00307838	0.0232177	0.0184255	1171	tags=38%, list=9%, signal=34%	PRF1/IL2RA/CD3G/CD247/CD3D/IFNG/CD86/CD3E/TBX21/IRF1/IL18RAP/CD28
REACTOME_BIOLOGICAL_OXIDATIONS	REACTOME_BIOLOGICAL_OXIDATIONS	161	-0.379219	-1.52114	0.00308166	0.0232177	0.0184255	2100	tags=25%, list=17%, signal=21%	ARNT2/NNMT/SULT1A2/CYP2A13/TPST2/CYP4A22/UGT2B15/NCOA1/CYP1A1/ESD/N6AMT1/CYP2A6/HPGDS/AHR/FDXR/GSTZ1/CYP4F11/SULT1A1/AKR7A3/CYP7A1/UGDH/ALDH1A1/CYP26A1/GSTM4/ADH1C/GSTM2/GSTM1/ACSM5/CYP21A2/AOC3/GSTT2/GSTT1/MAOA/CYP4F12/GSTM3/MAOB/ADH1B/CYP4F8/CYP4B1/NAT1
REACTOME_PEPTIDE_LIGAND_BINDING_RECEPTORS	REACTOME_PEPTIDE_LIGAND_BINDING_RECEPTORS	165	0.334874	1.44255	0.00308037	0.0232177	0.0184255	2156	tags=30%, list=17%, signal=25%	NMU/CXCL10/CXCL13/CXCL11/CXCL9/CXCL3/CCL20/CXCL8/CCL5/CXCR6/CCR1/CCL2/CCL4/CCR8/XK/SSTR1/CCR7/CCL7/FPR3/GAL/MC3R/TACR3/NMBR/CCL17/HCRTR2/CCR5/CCL22/NMB/XCL1/CXCL5/CXCL1/CCL16/CCRL2/CCL13/PMCH/HCRTR1/PYY/MC4R/CXCR4/AVP/SSTR5/MC5R/CX3CL1/KISS1/CXCR3/EDN3/CCKBR/SSTR3/C5AR1
REACTOME_REGULATION_OF_INSULIN_SECRETION	REACTOME_REGULATION_OF_INSULIN_SECRETION	70	-0.470735	-1.6739	0.00309652	0.0232248	0.0184311	1568	tags=34%, list=13%, signal=30%	PLCB1/ITPR2/GNG7/CACNB2/GNB5/CACNA1E/GNAQ/ACSL3/CD36/VAMP2/KCNS3/GNA14/RAPGEF3/STXBP1/PRKAR2B/GNG12/ABCC8/CACNA1C/RAPGEF4/GNG11/ADRA2A/CACNA2D2/CACNA1D/ITPR1
WP_NONGENOMIC_ACTIONS_OF_125_DIHYDROXYVITAMIN_D3	WP_NONGENOMIC_ACTIONS_OF_125_DIHYDROXYVITAMIN_D3	71	0.4292	1.61358	0.00310174	0.0232248	0.0184311	2561	tags=37%, list=21%, signal=29%	CAMP/CXCL8/ISG15/STAT1/TLR8/CCL2/RSAD2/IFNG/CD40LG/PLCG2/CYP27B1/IFI44L/OAS2/MAPK13/PRKCQ/TNF/IL6/TLR2/MED1/RELB/CD40/MAPK1/PRKCA/NRAS/PRKCG/MAPK12
KEGG_NOD_LIKE_RECEPTOR_SIGNALING_PATHWAY	KEGG_NOD_LIKE_RECEPTOR_SIGNALING_PATHWAY	56	0.476299	1.72262	0.00317471	0.023698	0.0188066	2862	tags=48%, list=23%, signal=37%	CCL8/CXCL8/CCL5/CCL2/RIPK2/BIRC3/CCL7/CASP5/CXCL1/NFKBIB/MAPK13/PSTPIP1/TNFAIP3/MEFV/CCL13/TNF/IL6/CARD9/CASP1/CCL11/MAPK1/NFKBIA/CHUK/MAPK12/MAPK14/HSP90B1/HSP90AB1
REACTOME_NOREPINEPHRINE_NEUROTRANSMITTER_RELEASE_CYCLE	REACTOME_NOREPINEPHRINE_NEUROTRANSMITTER_RELEASE_CYCLE	17	-0.657645	-1.76566	0.0033878	0.025211	0.0200074	1972	tags=47%, list=16%, signal=40%	SLC22A2/UNC13B/TSPOAP1/VAMP2/STXBP1/SLC18A2/SYT1/MAOA
WP_T_CELL_RECEPTOR_AND_COSTIMULATORY_SIGNALING	WP_T_CELL_RECEPTOR_AND_COSTIMULATORY_SIGNALING	26	0.573127	1.75924	0.00345499	0.0256324	0.0203418	2555	tags=46%, list=21%, signal=37%	PDK1/CTLA4/LCK/ITK/CD8A/CD28/PDCD1/RASGRP1/NFKBIA/PRKCA/IL2/GSK3B
NABA_SECRETED_FACTORS	NABA_SECRETED_FACTORS	269	0.296188	1.3662	0.0034835	0.0257652	0.0204471	1673	tags=22%, list=14%, signal=19%	S100A9/S100A8/S100A7/CXCL10/CXCL13/CXCL11/CXCL9/CCL18/S100P/NRTN/CCL8/CXCL3/CCL20/CXCL8/CCL5/ANGPT4/BRINP3/CCL2/CCL4/FGFBP1/EGFL6/GDF5/IL24/LTB/IL7/CCL7/INSL6/IFNG/S100A2/FGF8/S100A12/CCL17/S100G/ARTN/CCL22/XCL1/CXCL5/WNT3/IL15/CXCL1/IHH/FGF6/CCL16/S100B/FGF9/GDF11/NRG2/VEGFA/EBI3/IFNW1/CCL13/S100A11/IFNA21/WNT10B/TNF/IL19/IL6/LTA
WP_GLYCOLYSIS_AND_GLUCONEOGENESIS	WP_GLYCOLYSIS_AND_GLUCONEOGENESIS	44	0.475904	1.61235	0.00352205	0.0259711	0.0206106	2868	tags=55%, list=23%, signal=42%	PFKP/LDHB/HK3/LDHC/GPI/TPI1/SLC2A3/GAPDH/PGK1/ENO1/PGAM1/SLC2A1/DLAT/MDH1/PKM/PDHA1/GOT1/HK2/SLC2A5/MPC2/LDHA/PGK2/ENO3/PFKL
REACTOME_POSTMITOTIC_NUCLEAR_PORE_COMPLEX_NPC_REFORMATION	REACTOME_POSTMITOTIC_NUCLEAR_PORE_COMPLEX_NPC_REFORMATION	26	0.571931	1.75557	0.0035419	0.0260384	0.0206639	3299	tags=62%, list=27%, signal=45%	NUP93/RCC1/NUP155/SEC13/NUP205/NDC1/NUP62/RANGAP1/RAN/NUP85/AHCTF1/SEH1L/NUP107/NUP37/KPNB1/NUP58
REACTOME_DISEASES_OF_MITOTIC_CELL_CYCLE	REACTOME_DISEASES_OF_MITOTIC_CELL_CYCLE	32	0.550782	1.78342	0.00364602	0.0266613	0.0211583	1107	tags=28%, list=9%, signal=26%	UBE2C/UBE2S/CCNE1/CCNE2/SKP2/E2F1/E2F3/CDK4/TFDP1
BIOCARTA_RB_PATHWAY	BIOCARTA_RB_PATHWAY	13	0.694142	1.77825	0.00364862	0.0266613	0.0211583	946	tags=46%, list=8%, signal=43%	CDK1/CHEK1/CDC25A/CDC25B/CDC25C/CDK4
REACTOME_INTERLEUKIN_12_FAMILY_SIGNALING	REACTOME_INTERLEUKIN_12_FAMILY_SIGNALING	48	0.475195	1.6376	0.0036991	0.026949	0.0213866	3422	tags=50%, list=28%, signal=36%	LMNB1/IL12RB2/SNRPA1/STAT1/RALA/IFNG/PSME2/IL27RA/MTAP/LCP1/TALDO1/EBI3/MIF/MSN/P4HB/IL12B/IL12A/GSTO1/CA1/HNRNPF/AIP/STAT4/HNRNPA2B1/VAMP7
WP_MEASLES_VIRUS_INFECTION	WP_MEASLES_VIRUS_INFECTION	125	0.357567	1.48869	0.00372176	0.0270329	0.0214532	2593	tags=34%, list=21%, signal=27%	CCNE1/CCNE2/MX1/IL2RA/STAT1/IL2RG/CD3G/IRAK1/CD3D/OAS1/OAS3/IFIH1/CYCS/BAK1/CDK4/BID/CD3E/OAS2/CD28/DDX58/NFKBIB/TNFAIP3/SLAMF1/IFNA21/IL6/TLR2/FADD/FCGR2B/MSN/FASLG/HSPA6/CSNK2B/EIF2AK2/NFKBIA/RAB9A/IRF9/IKBKE/IL12B/CHUK/IL2/IL12A/IL2RB
REACTOME_C_TYPE_LECTIN_RECEPTORS_CLRS	REACTOME_C_TYPE_LECTIN_RECEPTORS_CLRS	123	0.374743	1.5497	0.00386959	0.0280228	0.0222387	2503	tags=37%, list=20%, signal=29%	MUC16/CLEC7A/PSMA7/PSMD3/PSMB9/MUC5B/LYN/PSMB5/PSMD7/PLCG2/PSME2/PSMB3/PSMA4/CCL17/PSMB2/PSMA3/CCL22/PSMA5/FCER1G/PSMB7/PSMD14/PSME4/SEM1/PSMB10/PSMD8/SYK/PSMC3/PSMD2/PSMB4/CARD9/PSMC4/RELB/PSMA2/PSMB6/NFKBIA/PRKACB/UBE2D1/MUC4/CDC34/NRAS/CUL1/UBE2N/CHUK/PSMD12/PSMA1
REACTOME_PROCESSIVE_SYNTHESIS_ON_THE_LAGGING_STRAND	REACTOME_PROCESSIVE_SYNTHESIS_ON_THE_LAGGING_STRAND	15	0.669864	1.77792	0.00392187	0.0280336	0.0222473	1898	tags=60%, list=15%, signal=51%	FEN1/PCNA/DNA2/POLA2/PRIM1/PRIM2/POLD1/POLD2/RPA3
WP_FAMILIAL_PARTIAL_LIPODYSTROPHY	WP_FAMILIAL_PARTIAL_LIPODYSTROPHY	30	-0.571332	-1.75502	0.00390013	0.0280336	0.0222473	1087	tags=33%, list=9%, signal=30%	CIDEC/PRRX1/PPARG/LPL/CIDEA/SREBF1/LIPE/FABP4/PLIN1/GATA3
REACTOME_CYCLIN_D_ASSOCIATED_EVENTS_IN_G1	REACTOME_CYCLIN_D_ASSOCIATED_EVENTS_IN_G1	47	0.489761	1.68492	0.00392886	0.0280336	0.0222473	1151	tags=28%, list=9%, signal=25%	CCNE1/CKS1B/CCNE2/SKP2/PPP2R3B/E2F1/CDKN2A/LYN/E2F3/CDKN2C/CDK4/TFDP1/E2F5
REACTOME_TRANSCRIPTIONAL_REGULATION_OF_GRANULOPOIESIS	REACTOME_TRANSCRIPTIONAL_REGULATION_OF_GRANULOPOIESIS	49	0.479812	1.66734	0.00392586	0.0280336	0.0222473	3337	tags=53%, list=27%, signal=39%	H2AZ1/MYC/H2BC12/E2F1/CEBPB/H2BC11/H3C10/CDK4/TFDP1/H2BC9/DEK/CBFB/H2BC3/H2AX/KLF5/CEBPE/H2AC4/IL6R/PML/H2AC14/GFI1/SPI1/CDK2/TFDP2/CEBPA/CDKN1A
REACTOME_TRANSLESION_SYNTHESIS_BY_Y_FAMILY_DNA_POLYMERASES_BYPASSES_LESIONS_ON_DNA_TEMPLATE	REACTOME_TRANSLESION_SYNTHESIS_BY_Y_FAMILY_DNA_POLYMERASES_BYPASSES_LESIONS_ON_DNA_TEMPLATE	34	0.513529	1.6645	0.00391729	0.0280336	0.0222473	1898	tags=44%, list=15%, signal=37%	ISG15/PCLAF/RFC4/PCNA/POLE2/RFC2/POLD1/UFD1/RFC3/USP10/UBE2L6/POLD2/POLE3/VCP/RPA3
REACTOME_SIGNALING_BY_MET	REACTOME_SIGNALING_BY_MET	72	-0.461256	-1.64503	0.0039964	0.0284318	0.0225634	2070	tags=26%, list=17%, signal=22%	TNS3/PIK3R1/LAMA4/HGF/COL11A1/COL2A1/ITGA3/LAMB1/COL1A2/COL1A1/COL3A1/COL5A3/COL5A2/LRIG1/COL5A1/LAMA2/LAMA3/HPN/LAMB2
BIOCARTA_SRCRPTP_PATHWAY	BIOCARTA_SRCRPTP_PATHWAY	11	0.736349	1.78098	0.00416447	0.029541	0.0234436	1358	tags=55%, list=11%, signal=49%	CDK1/CCNB1/CDC25A/CDC25B/CDC25C/CSK
REACTOME_MITOTIC_TELOPHASE_CYTOKINESIS	REACTOME_MITOTIC_TELOPHASE_CYTOKINESIS	13	0.687519	1.76128	0.00421976	0.0298459	0.0236855	137	tags=23%, list=1%, signal=23%	KIF23/KIF20A/PLK1
REACTOME_RECOGNITION_OF_DNA_DAMAGE_BY_PCNA_CONTAINING_REPLICATION_COMPLEX	REACTOME_RECOGNITION_OF_DNA_DAMAGE_BY_PCNA_CONTAINING_REPLICATION_COMPLEX	28	0.577572	1.80961	0.00426382	0.0300698	0.0238633	2507	tags=50%, list=20%, signal=40%	DTL/RFC4/PCNA/POLE2/RFC2/USP1/POLD1/RFC3/RBX1/POLD2/POLE3/RPA3/DDB1/RFC5
PID_P73PATHWAY	PID_P73PATHWAY	76	0.415293	1.58095	0.00431508	0.0303432	0.0240802	1119	tags=18%, list=9%, signal=17%	CCNA2/CDK1/CHEK1/CCNB1/PLK1/RAD51/CCNE2/BUB1/MYC/S100A2/SFN/BAK1/BIN1/ADA
WP_BLADDER_CANCER	WP_BLADDER_CANCER	40	0.51241	1.72203	0.00448152	0.0313319	0.0248649	2379	tags=45%, list=19%, signal=36%	MMP1/MMP9/CXCL8/MYC/E2F1/CDKN2A/CDK4/UPK3A/VEGFA/CDH1/MAP2K1/TYMP/EGFR/MAP2K2/EGF/MAPK1/DAPK1/NRAS
REACTOME_SUMOYLATION_OF_UBIQUITINYLATION_PROTEINS	REACTOME_SUMOYLATION_OF_UBIQUITINYLATION_PROTEINS	37	0.512438	1.67957	0.00447181	0.0313319	0.0248649	3299	tags=49%, list=27%, signal=36%	NUP93/NUP155/VHL/SEC13/NUP205/NDC1/NUP62/NUP88/NUP85/NUP50/RAE1/NUP42/PML/NUP153/SEH1L/NUP107/NUP37/NUP58
REACTOME_FC_EPSILON_RECEPTOR_FCERI_SIGNALING	REACTOME_FC_EPSILON_RECEPTOR_FCERI_SIGNALING	125	0.354694	1.47673	0.00450254	0.0313884	0.0249097	2771	tags=40%, list=22%, signal=31%	IGLV1-44/IGHV3-48/PSMA7/PSMD3/PSMB9/IGLV6-57/LYN/PSMB5/PSMD7/PLCG2/ITK/PSME2/PSMB3/PSMA4/PSMB2/PSMA3/LCP2/PSMA5/FCER1G/PSMB7/PSMD14/PSME4/SEM1/PRKCQ/PSMB10/PSMD8/SYK/PSMC3/PSMD2/PSMB4/PSMC4/RASGRP1/PSMA2/GRAP2/MAPK1/SOS1/PSMB6/NFKBIA/UBE2D1/CDC34/NRAS/CUL1/UBE2N/CHUK/PSMD12/PSMA1/PSMD10/TXK/NFATC3/PSMD1
REACTOME_PRC2_METHYLATES_HISTONES_AND_DNA	REACTOME_PRC2_METHYLATES_HISTONES_AND_DNA	31	0.538363	1.71983	0.00458493	0.0318712	0.0252928	1622	tags=35%, list=13%, signal=31%	EZH2/H2AZ1/H2BC12/H2BC11/H3C10/DNMT3B/H2BC9/H2BC3/DNMT3A/DNMT1/H2AX
WP_FLUOROPYRIMIDINE_ACTIVITY	WP_FLUOROPYRIMIDINE_ACTIVITY	29	0.57179	1.80269	0.00462944	0.0320886	0.0254654	2099	tags=52%, list=17%, signal=43%	RRM2/GGH/TK1/UPP1/TYMS/DHFR/PPAT/ABCC4/DPYS/UPB1/TYMP/XRCC3/UMPS/RRM1/TDG
WP_PTDINS45P2_IN_CYTOKINESIS_PATHWAY	WP_PTDINS45P2_IN_CYTOKINESIS_PATHWAY	11	0.731422	1.76906	0.0047305	0.0326281	0.0258935	139	tags=18%, list=1%, signal=18%	KIF23/RACGAP1
REACTOME_CYTOSOLIC_TRNA_AMINOACYLATION	REACTOME_CYTOSOLIC_TRNA_AMINOACYLATION	23	0.580185	1.72412	0.00473417	0.0326281	0.0258935	3444	tags=70%, list=28%, signal=50%	WARS1/GARS1/YARS1/TARS1/EPRS1/AARS1/KARS1/IARS1/MARS1/CARS1/PPA1/FARSA/AIMP2/VARS1/DARS1/EEF1E1
BIOCARTA_EFP_PATHWAY	BIOCARTA_EFP_PATHWAY	15	0.659252	1.74975	0.00479625	0.0329623	0.0261588	1445	tags=47%, list=12%, signal=41%	CCNB2/CDK1/CCNB1/SFN/CDK4/CDK8/CDK5
REACTOME_PROTEIN_UBIQUITINATION	REACTOME_PROTEIN_UBIQUITINATION	60	0.444153	1.59892	0.00484094	0.0331755	0.0263279	2526	tags=30%, list=20%, signal=24%	UBE2C/UBE2S/H2BC12/PCNA/PEX13/H2BC11/DERL1/UBE2V2/H2BC9/H2BC3/VCP/UBE2A/PRKDC/UBE2D1/UCHL3/CDC34/UBE2N/CDC73
REACTOME_AURKA_ACTIVATION_BY_TPX2	REACTOME_AURKA_ACTIVATION_BY_TPX2	64	0.430151	1.5704	0.00486564	0.0332508	0.0263877	247	tags=12%, list=2%, signal=12%	TPX2/NEK2/CDK1/AURKA/HMMR/PLK1/PLK4/HAUS6
WP_PYRIMIDINE_METABOLISM	WP_PYRIMIDINE_METABOLISM	66	0.423831	1.56521	0.00488534	0.0332916	0.0264201	2146	tags=35%, list=17%, signal=29%	RRM2/CTPS1/TK1/UPP1/TYMS/NME1/POLE2/POLA2/DTYMK/PRIM1/DPYS/UPB1/PRIM2/POLD1/DCK/POLR2K/TYMP/POLD2/POLR2D/POLE3/UMPS/RRM1/POLR3G
BIOCARTA_RANMS_PATHWAY	BIOCARTA_RANMS_PATHWAY	10	0.736842	1.73683	0.00495147	0.0336478	0.0267027	1850	tags=80%, list=15%, signal=68%	TPX2/AURKA/KIF15/KPNA2/RANBP1/RCC1/RANGAP1/RAN
WP_CHEMOKINE_SIGNALING_PATHWAY	WP_CHEMOKINE_SIGNALING_PATHWAY	149	0.338198	1.44528	0.00515181	0.0349114	0.0277055	2606	tags=33%, list=21%, signal=26%	CXCL10/CXCL13/CXCL11/CXCL9/CXCL3/CCL20/CCL5/CXCR6/CCR1/STAT1/CCL4/HCK/CCR8/CCR7/LYN/CCL7/ADCY8/PRKX/ITK/CCL17/DOCK2/CCL22/XCL1/CXCL5/ARRB2/NFKBIB/GNGT1/RAC2/CSK/MAP2K1/CXCR4/WAS/GRK6/GNG5/CX3CL1/CXCR3/CCL11/MAPK1/SOS1/NFKBIA/PRKACB/NRAS/GNG4/CHUK/XCR1/CCR2/CCR3/GSK3B/ADCY7
REACTOME_DNA_METHYLATION	REACTOME_DNA_METHYLATION	24	0.575198	1.7253	0.00517469	0.0349688	0.0277511	1622	tags=42%, list=13%, signal=36%	H2AZ1/H2BC12/H2BC11/H3C10/DNMT3B/H2BC9/H2BC3/DNMT3A/DNMT1/H2AX
WP_JOUBERT_SYNDROME	WP_JOUBERT_SYNDROME	60	-0.474844	-1.64352	0.00520807	0.0350966	0.0278525	2964	tags=35%, list=24%, signal=27%	ATM/MKS1/OFD1/TCTN1/ARL3/RAD50/PDE6B/AHI1/CEP41/CCP110/CEP290/BBS9/UNC119/PIBF1/PCM1/SHH/BBS1/BBS4/MYO6/CPLANE1/ZNF423
KEGG_ALLOGRAFT_REJECTION	KEGG_ALLOGRAFT_REJECTION	33	0.527507	1.71884	0.00524668	0.0352588	0.0279813	3060	tags=64%, list=25%, signal=48%	GZMB/PRF1/HLA-DRB4/HLA-DOB/IFNG/CD40LG/CD86/CD28/TNF/HLA-DQB1/HLA-G/FASLG/CD40/HLA-F/IL12B/IL2/IL12A/HLA-DMB/HLA-DMA/HLA-DRA/HLA-B
REACTOME_ION_HOMEOSTASIS	REACTOME_ION_HOMEOSTASIS	47	-0.513734	-1.7074	0.00533035	0.0357222	0.028349	2879	tags=38%, list=23%, signal=29%	SLC8A2/ITPR2/SLC8A1/SLN/DMPK/ATP2B1/CASQ2/ATP1B2/CASQ1/ASPH/SRI/ATP1B1/FKBP1B/TRPC1/ATP1A2/PLN/FXYD1/ITPR1
REACTOME_CARDIAC_CONDUCTION	REACTOME_CARDIAC_CONDUCTION	108	-0.403495	-1.53356	0.00537891	0.0359483	0.0285284	2950	tags=37%, list=24%, signal=28%	KCNE2/SLC8A2/KCND1/SCN11A/ITPR2/SLC8A1/SCN9A/CACNB2/SLN/KCNQ1/DMPK/SCN2A/ATP2B1/NPR2/CASQ2/RANGRF/ATP1B2/NPR1/AKAP9/CASQ1/ASPH/FGF14/SRI/KCND3/ATP1B1/MME/FKBP1B/TRPC1/KCND2/ATP1A2/CACNG4/CACNA1C/PLN/SCN3B/CACNA2D2/FXYD1/ITPR1/CORIN/KCNK15/KCNE4
PID_IL23_PATHWAY	PID_IL23_PATHWAY	35	0.51941	1.69549	0.00539913	0.0359843	0.028557	2710	tags=46%, list=22%, signal=36%	CXCL9/STAT1/CCL2/IL24/IFNG/CD3E/CXCL1/IL18RAP/TNF/IL19/IL6/SOCS3/NFKBIA/IL12B/IL2/ALOX12B
WP_PHOTODYNAMIC_THERAPYINDUCED_HIF1_SURVIVAL_SIGNALING	WP_PHOTODYNAMIC_THERAPYINDUCED_HIF1_SURVIVAL_SIGNALING	37	0.504987	1.65515	0.00546497	0.0363234	0.0288261	2405	tags=49%, list=19%, signal=39%	BCL2A1/BIRC5/SLC2A3/BAK1/BID/PGK1/BNIP3/SLC2A1/VEGFA/PKM/SLC16A1/PDHA1/PTGS2/HIF1A/TGFA/SERPINE1/PMAIP1/LDHA
REACTOME_CTLA4_INHIBITORY_SIGNALING	REACTOME_CTLA4_INHIBITORY_SIGNALING	21	0.596147	1.72457	0.00563036	0.0372545	0.029565	805	tags=19%, list=7%, signal=18%	CTLA4/LCK/LYN/CD86
REACTOME_MUSCLE_CONTRACTION	REACTOME_MUSCLE_CONTRACTION	179	-0.35288	-1.43357	0.00563577	0.0372545	0.029565	3057	tags=34%, list=25%, signal=26%	ACTC1/ACTA2/KCNE2/CALD1/SLC8A2/MYLK/KCND1/GUCY1A1/SCN11A/ITPR2/GUCY1A2/SLC8A1/ITGA1/TPM2/SCN9A/CACNB2/SORBS3/MYBPC1/SLN/TNNT2/KCNQ1/DMPK/ACTG2/SCN2A/MYL5/TNNT1/PDE5A/ATP2B1/NPR2/CASQ2/RANGRF/ATP1B2/TPM1/NPR1/AKAP9/CASQ1/ASPH/FGF14/SRI/KCND3/ATP1B1/MME/SORBS1/FKBP1B/MYL9/TRPC1/KCND2/ATP1A2/CACNG4/ITGB5/CACNA1C/PLN/SCN3B/LMOD1/CACNA2D2/FXYD1/ITPR1/CORIN/KCNK15/MYH11/KCNE4
REACTOME_FOXO_MEDIATED_TRANSCRIPTION_OF_OXIDATIVE_STRESS_METABOLIC_AND_NEURONAL_GENES	REACTOME_FOXO_MEDIATED_TRANSCRIPTION_OF_OXIDATIVE_STRESS_METABOLIC_AND_NEURONAL_GENES	23	-0.606903	-1.75259	0.00565447	0.0372765	0.0295825	1942	tags=39%, list=16%, signal=33%	NR3C1/SMAD3/FOXO4/AGRP/FOXO1/SIRT3/SREBF1/ABCA6/PCK1
KEGG_TGF_BETA_SIGNALING_PATHWAY	KEGG_TGF_BETA_SIGNALING_PATHWAY	81	-0.44102	-1.60551	0.00588098	0.0386647	0.0306841	2576	tags=33%, list=21%, signal=27%	ACVR1/THBS1/INHBA/SMAD1/MAPK3/THBS3/SMAD3/ID3/SKP1/CREBBP/AMH/ACVRL1/CHRD/TGFB2/ID1/ID4/TGFBR2/ZFYVE16/THBS2/INHBB/FST/BMPR1B/TGFB3/DCN/THBS4/COMP/BMP4
REACTOME_TRANSCRIPTIONAL_REGULATION_OF_WHITE_ADIPOCYTE_DIFFERENTIATION	REACTOME_TRANSCRIPTIONAL_REGULATION_OF_WHITE_ADIPOCYTE_DIFFERENTIATION	75	-0.434348	-1.55572	0.00605089	0.0396742	0.0314853	2678	tags=29%, list=22%, signal=23%	NR2F2/MED4/MED6/MED25/NCOA2/NCOR1/MED16/ZNF638/CREBBP/NCOA1/CHD9/CD36/PPARG/MED13L/LPL/LEP/SREBF1/ADIPOQ/PCK1/FABP4/PLIN1/ADIRF
REACTOME_TRANSPORT_OF_MATURE_TRANSCRIPT_TO_CYTOPLASM	REACTOME_TRANSPORT_OF_MATURE_TRANSCRIPT_TO_CYTOPLASM	68	0.41752	1.55279	0.00607973	0.0397559	0.0315501	3299	tags=43%, list=27%, signal=31%	MAGOHB/NUP93/DDX39A/SLBP/NUP155/MAGOH/SEC13/NUP205/NDC1/SRSF2/EIF4A3/NXT1/NUP62/NUP88/NUP85/NUP50/RAE1/NUP42/NCBP1/NUP153/SEH1L/EIF4E/NUP107/DHX38/THOC5/U2AF1/SRSF3/NUP37/NUP58
REACTOME_SMOOTH_MUSCLE_CONTRACTION	REACTOME_SMOOTH_MUSCLE_CONTRACTION	41	-0.512905	-1.65777	0.00627556	0.0409261	0.0324788	3690	tags=54%, list=30%, signal=38%	MYL6/GUCY1B1/ANXA6/ALDH2/MYL12B/ACTA2/CALD1/MYLK/GUCY1A1/GUCY1A2/ITGA1/TPM2/SORBS3/ACTG2/MYL5/PDE5A/TPM1/SORBS1/MYL9/ITGB5/LMOD1/MYH11
WP_NUCLEAR_RECEPTORS	WP_NUCLEAR_RECEPTORS	38	-0.52577	-1.68687	0.00631775	0.0410683	0.0325916	2765	tags=37%, list=22%, signal=29%	NR2F1/NR2F2/NR5A1/NR1D2/NR3C1/RXRG/RARA/NR4A2/NR5A2/PPARG/ESR1/RORC/AR/PGR
REACTOME_PCP_CE_PATHWAY	REACTOME_PCP_CE_PATHWAY	86	0.391102	1.52071	0.00633123	0.0410683	0.0325916	3215	tags=45%, list=26%, signal=34%	PSMA7/PSMD3/PSMB9/PSMB5/PSMD7/PSME2/PSMB3/PSMA4/PSMB2/PSMA3/PSMA5/PSMB7/PSMD14/ARRB2/PSME4/RAC2/SEM1/PSMB10/PSMD8/PSMC3/PSMD2/PSMB4/PSMC4/PFN1/PSMA2/AP2S1/PSMB6/PRKCA/PRKCG/PSMD12/PSMA1/PSMD10/SCRIB/PSMD1/CLTA/SMURF2/PSMB8/PRKCB/DVL3
REACTOME_INTRA_GOLGI_AND_RETROGRADE_GOLGI_TO_ER_TRAFFIC	REACTOME_INTRA_GOLGI_AND_RETROGRADE_GOLGI_TO_ER_TRAFFIC	163	0.33439	1.43795	0.00658532	0.0426026	0.0338093	205	tags=7%, list=2%, signal=7%	KIF23/CENPE/KIF18A/KIF11/KIFC1/KIF18B/KIF20A/KIF4A/KIF2C/RACGAP1/KIF15
REACTOME_SYNDECAN_INTERACTIONS	REACTOME_SYNDECAN_INTERACTIONS	26	-0.592611	-1.77241	0.00676113	0.0436236	0.0346195	2504	tags=50%, list=20%, signal=40%	SDC2/THBS1/SDC4/TNC/ITGAV/COL1A2/COL1A1/FGF2/COL3A1/COL5A3/COL5A2/ITGB5/COL5A1
REACTOME_REGULATION_OF_TLR_BY_ENDOGENOUS_LIGAND	REACTOME_REGULATION_OF_TLR_BY_ENDOGENOUS_LIGAND	19	0.604704	1.71141	0.00678285	0.0436477	0.0346386	1682	tags=32%, list=14%, signal=27%	S100A9/S100A8/TLR1/LBP/CD14/TLR2
REACTOME_VIRAL_MESSENGER_RNA_SYNTHESIS	REACTOME_VIRAL_MESSENGER_RNA_SYNTHESIS	42	0.468786	1.58149	0.00686349	0.0440498	0.0349577	3299	tags=50%, list=27%, signal=37%	NUP93/POLR2F/NUP155/POLR2K/SEC13/NUP205/NDC1/NUP62/POLR2D/NUP88/NUP85/NUP50/RAE1/NUP42/POLR2H/NUP153/SEH1L/NUP107/NUP37/POLR2J/NUP58
WP_IL1_AND_MEGAKARYOCYTES_IN_OBESITY	WP_IL1_AND_MEGAKARYOCYTES_IN_OBESITY	24	0.563301	1.68962	0.00697082	0.0446206	0.0354107	1023	tags=33%, list=8%, signal=31%	S100A9/PLA2G7/MMP9/CCL2/IRAK1/IFNG/TLR1/ICAM1
REACTOME_PCNA_DEPENDENT_LONG_PATCH_BASE_EXCISION_REPAIR	REACTOME_PCNA_DEPENDENT_LONG_PATCH_BASE_EXCISION_REPAIR	20	0.603278	1.73819	0.00700554	0.0447249	0.0354935	2620	tags=65%, list=21%, signal=51%	FEN1/RFC4/PCNA/POLE2/RFC2/POLD1/RFC3/POLD2/POLE3/RPA3/LIG1/RFC5/APEX1
BIOCARTA_BLYMPHOCYTE_PATHWAY	BIOCARTA_BLYMPHOCYTE_PATHWAY	11	0.710192	1.71771	0.00715635	0.0455678	0.0361624	2092	tags=73%, list=17%, signal=60%	HLA-DRB4/ITGB2/PTPRC/ICAM1/CR1/FCGR2B/CR2/CD40
REACTOME_POLYMERASE_SWITCHING	REACTOME_POLYMERASE_SWITCHING	14	0.680115	1.77842	0.00721732	0.0457666	0.0363202	1685	tags=64%, list=14%, signal=56%	RFC4/PCNA/POLA2/RFC2/PRIM1/PRIM2/POLD1/RFC3/POLD2
REACTOME_COOPERATION_OF_PREFOLDIN_AND_TRIC_CCT_IN_ACTIN_AND_TUBULIN_FOLDING	REACTOME_COOPERATION_OF_PREFOLDIN_AND_TRIC_CCT_IN_ACTIN_AND_TUBULIN_FOLDING	29	0.55698	1.75599	0.00722532	0.0457666	0.0363202	2243	tags=48%, list=18%, signal=40%	CCT5/TUBA4A/CCT6A/TUBA4B/PFDN2/CCT2/TUBA1C/TUBB3/TUBB4B/TUBA1B/CCT3/TUBB1/CCT7/CCT4
REACTOME_CGMP_EFFECTS	REACTOME_CGMP_EFFECTS	15	-0.648556	-1.70498	0.00727025	0.0459313	0.0364509	1930	tags=53%, list=16%, signal=45%	PDE10A/KCNMB2/PDE5A/PRKG1/PDE1A/KCNMA1/PDE2A/ITPR1
REACTOME_TCF_DEPENDENT_SIGNALING_IN_RESPONSE_TO_WNT	REACTOME_TCF_DEPENDENT_SIGNALING_IN_RESPONSE_TO_WNT	171	0.308468	1.33766	0.00735095	0.0463205	0.0367598	1844	tags=24%, list=15%, signal=21%	H2AZ1/MYC/H2BC12/PSMA7/PSMD3/PSMB9/H2BC11/H3C10/PSMB5/RUNX3/KREMEN2/PSMD7/CCDC88C/PSME2/PSMB3/RUVBL1/PSMA4/LGR5/PSMB2/PSMA3/PSMA5/PSMB7/WNT3/DKK1/PSMD14/TLE1/H2BC9/YWHAZ/PSME4/SEM1/H2BC3/PSMB10/SOX4/PSMD8/PSMC3/H2AX/RBX1/PSMD2/PSMB4/H3-4/PSMC4
REACTOME_FATTY_ACIDS	REACTOME_FATTY_ACIDS	13	-0.683314	-1.70369	0.007376	0.046358	0.0367895	2008	tags=46%, list=16%, signal=39%	CYP2A13/CYP4A22/CYP4F11/CYP4F12/CYP4F8/CYP4B1
REACTOME_NUCLEOTIDE_SALVAGE	REACTOME_NUCLEOTIDE_SALVAGE	19	0.599465	1.69658	0.00744864	0.0466393	0.0370127	1646	tags=47%, list=13%, signal=41%	TK1/UPP1/PNP/GMPR/APRT/DCK/ADA/HPRT1/TYMP
REACTOME_CELL_SURFACE_INTERACTIONS_AT_THE_VASCULAR_WALL	REACTOME_CELL_SURFACE_INTERACTIONS_AT_THE_VASCULAR_WALL	135	0.341998	1.44624	0.00745921	0.0466393	0.0370127	1590	tags=21%, list=13%, signal=19%	MMP1/SLC7A5/IGLV1-44/IGHV3-48/ANGPT4/TREM1/LCK/IGHM/SELL/GRB14/CD2/L1CAM/SIRPG/IGLV6-57/LYN/DOK2/PSG2/EPCAM/ATP1B3/ITGB2/CD48/FCER1G/SLC16A3/CEACAM8/SELPLG/VPREB3/SLC16A1/MIF/SLC7A7
WP_INTERACTIONS_BETWEEN_IMMUNE_CELLS_AND_MICRORNAS_IN_TUMOR_MICROENVIRONMENT	WP_INTERACTIONS_BETWEEN_IMMUNE_CELLS_AND_MICRORNAS_IN_TUMOR_MICROENVIRONMENT	27	0.546382	1.68766	0.00755552	0.0467594	0.0371081	805	tags=30%, list=7%, signal=28%	CXCL10/CTLA4/CCL5/IL2RA/TLR8/CCL2/IL2RG/CD86
REACTOME_PEPTIDE_HORMONE_METABOLISM	REACTOME_PEPTIDE_HORMONE_METABOLISM	73	-0.445218	-1.59627	0.0075524	0.0467594	0.0371081	1255	tags=23%, list=10%, signal=21%	VAMP2/FSHB/BCHE/ERO1B/CTSG/MME/LEP/INHBB/CPB1/ANPEP/CPE/KIF5C/CPA3/UCN/IGF1/MYRIP/GRP
REACTOME_MEIOTIC_RECOMBINATION	REACTOME_MEIOTIC_RECOMBINATION	45	0.469276	1.59494	0.00751096	0.0467594	0.0371081	2481	tags=40%, list=20%, signal=32%	RAD51/H2AZ1/H2BC12/BLM/H2BC11/H3C10/CDK4/H2BC9/NBN/H2BC3/H2AX/H3-4/RPA3/BRCA1/BRCA2/H2AC4/RAD51C/H2AC14
REACTOME_HEDGEHOG_OFF_STATE	REACTOME_HEDGEHOG_OFF_STATE	100	0.363804	1.46952	0.00753177	0.0467594	0.0371081	2940	tags=44%, list=24%, signal=34%	PSMA7/PSMD3/PSMB9/ADCY8/PSMB5/TUBA4A/PSMD7/PSME2/PSMB3/PSMA4/TUBA1C/PSMB2/PSMA3/PSMA5/PSMB7/PSMD14/PSME4/TUBB3/SEM1/TUBB4B/PSMB10/PSMD8/TUBA1B/PSMC3/RBX1/PSMD2/ITCH/PSMB4/GPR161/PSMC4/PSMA2/TUBB1/PSMB6/PRKACB/CUL1/PSMD12/PSMA1/GSK3B/ADCY7/PSMD10/PSMD1/PRKAR1B/GNAS/PRKACG
WP_REGULATION_OF_WNT_BCATENIN_SIGNALING_BY_SMALL_MOLECULE_COMPOUNDS	WP_REGULATION_OF_WNT_BCATENIN_SIGNALING_BY_SMALL_MOLECULE_COMPOUNDS	16	-0.677315	-1.80692	0.00774829	0.0478048	0.0379376	2704	tags=62%, list=22%, signal=49%	DVL2/TNKS/FZD8/FZD1/CTNNB1/APC/DKK3/TCF4/LRP1/SFRP4
BIOCARTA_PTC1_PATHWAY	BIOCARTA_PTC1_PATHWAY	11	0.706209	1.70808	0.00780325	0.0478048	0.0379376	894	tags=45%, list=7%, signal=42%	CDK1/CCNB1/CDC25A/CDC25B/CDC25C
WP_ONECARBON_METABOLISM	WP_ONECARBON_METABOLISM	25	0.537147	1.63658	0.00779015	0.0478048	0.0379376	1550	tags=36%, list=13%, signal=32%	MTHFD2/TYMS/SHMT2/DHFR/DNMT3B/AHCY/MTHFD1/DNMT3A/DNMT1
REACTOME_CLASS_A_1_RHODOPSIN_LIKE_RECEPTORS	REACTOME_CLASS_A_1_RHODOPSIN_LIKE_RECEPTORS	272	0.283938	1.312	0.00778659	0.0478048	0.0379376	2156	tags=26%, list=17%, signal=22%	NMU/CXCL10/CXCL13/CXCL11/CXCL9/CXCL3/CCL20/CXCL8/CCL5/CXCR6/CCR1/CCL2/LHCGR/CCL4/CCR8/XK/SSTR1/CCR7/ADORA2B/CCL7/FPR3/GAL/GPR18/P2RY6/MC3R/TACR3/HTR1B/GPR183/DRD1/FFAR2/NMBR/CCL17/HCRTR2/CCR5/CHRM4/CCL22/NMB/GPR17/XCL1/CXCL5/S1PR5/CXCL1/S1PR4/GNRH2/CCL16/CCRL2/ADRA1B/CCL13/GPR65/PMCH/HCRTR1/MTNR1A/PYY/MC4R/CXCR4/CHRM5/AVP/SSTR5/OPN3/CMKLR1/LPAR3/MC5R/CX3CL1/KISS1/CXCR3/EDN3/CCKBR/PTAFR/SSTR3/C5AR1
REACTOME_GABA_SYNTHESIS_RELEASE_REUPTAKE_AND_DEGRADATION	REACTOME_GABA_SYNTHESIS_RELEASE_REUPTAKE_AND_DEGRADATION	15	-0.645932	-1.69808	0.00793723	0.0485031	0.0384918	1731	tags=33%, list=14%, signal=29%	GAD1/VAMP2/STXBP1/SYT1/ABAT
REACTOME_NEUROTRANSMITTER_RELEASE_CYCLE	REACTOME_NEUROTRANSMITTER_RELEASE_CYCLE	47	-0.500847	-1.66457	0.00836015	0.0509591	0.0404409	2123	tags=30%, list=17%, signal=25%	ARL6IP5/SLC22A2/UNC13B/TSPOAP1/GAD1/VAMP2/GLS2/LIN7A/STXBP1/SLC18A2/SYT1/MAOA/SLC1A1/ABAT
KEGG_HOMOLOGOUS_RECOMBINATION	KEGG_HOMOLOGOUS_RECOMBINATION	25	0.533572	1.62568	0.00838611	0.0509892	0.0404648	2464	tags=48%, list=20%, signal=39%	RAD54L/RAD51/BLM/POLD1/SEM1/NBN/POLD2/XRCC3/RPA3/TOP3B/BRCA2/RAD51C
REACTOME_TRANSPORT_OF_MATURE_MRNAS_DERIVED_FROM_INTRONLESS_TRANSCRIPTS	REACTOME_TRANSPORT_OF_MATURE_MRNAS_DERIVED_FROM_INTRONLESS_TRANSCRIPTS	36	0.505145	1.65466	0.00845367	0.0512715	0.0406888	3299	tags=53%, list=27%, signal=39%	NUP93/SLBP/NUP155/SEC13/NUP205/NDC1/NUP62/NUP88/NUP85/NUP50/RAE1/NUP42/NCBP1/NUP153/SEH1L/EIF4E/NUP107/NUP37/NUP58
WP_CANCER_IMMUNOTHERAPY_BY_PD1_BLOCKADE	WP_CANCER_IMMUNOTHERAPY_BY_PD1_BLOCKADE	20	0.596196	1.71779	0.00864586	0.0521763	0.0414069	1013	tags=35%, list=8%, signal=32%	LCK/PDCD1LG2/CD3G/CD3D/IFNG/CD8A/CD3E
BIOCARTA_IL17_PATHWAY	BIOCARTA_IL17_PATHWAY	15	0.63596	1.68793	0.008634	0.0521763	0.0414069	1013	tags=47%, list=8%, signal=43%	CXCL8/CD2/CD3G/CD247/CD3D/CD8A/CD3E
REACTOME_ABC_FAMILY_PROTEINS_MEDIATED_TRANSPORT	REACTOME_ABC_FAMILY_PROTEINS_MEDIATED_TRANSPORT	90	0.370792	1.45845	0.00872275	0.0525096	0.0416714	2789	tags=44%, list=23%, signal=35%	PSMA7/PSMD3/PSMB9/EIF2S2/PSMB5/PSMD7/DERL1/ABCC4/PSME2/PSMB3/ABCA4/PSMA4/PSMB2/PSMA3/PSMA5/PSMB7/PSMD14/ABCB9/PSME4/SEM1/ABCD1/ABCC2/PSMB10/PSMD8/PSMC3/PSMD2/PSMB4/ABCC1/VCP/PSMC4/CFTR/PSMA2/ABCB6/PSMB6/PSMD12/PSMA1/ABCF1/PSMD10/PSMD1/ABCG5
WP_BIOMARKERS_FOR_PYRIMIDINE_METABOLISM_DISORDERS	WP_BIOMARKERS_FOR_PYRIMIDINE_METABOLISM_DISORDERS	12	0.67612	1.67402	0.00877173	0.0526045	0.0417467	2159	tags=75%, list=17%, signal=62%	RRM2/TYMS/DPYS/UPB1/PUS1/TYMP/UMPS/RRM1/CKB
WP_NAD_BIOSYNTHETIC_PATHWAYS	WP_NAD_BIOSYNTHETIC_PATHWAYS	19	0.590985	1.67258	0.00878187	0.0526045	0.0417467	210	tags=21%, list=2%, signal=21%	QPRT/IDO1/TDO2/CD38
NABA_ECM_AFFILIATED	NABA_ECM_AFFILIATED	106	-0.389385	-1.4859	0.00889745	0.0531656	0.042192	1682	tags=23%, list=14%, signal=20%	MBL2/ANXA3/OVGP1/CLEC2B/LGALS8/GPC1/MUC7/SEMA3B/MUC6/PLXDC1/SEMA5A/CLEC11A/SEMA3G/HPX/SEMA3C/PLXNB1/GPC4/COLEC12/OPRPN/MUC1/SEMA3E/C1QTNF3/ANXA9/EMCN
BIOCARTA_MHC_PATHWAY	BIOCARTA_MHC_PATHWAY	11	0.697712	1.68753	0.00902016	0.0536346	0.0425642	1333	tags=45%, list=11%, signal=41%	TAP1/HLA-DRB4/PSMB9/PSMB5/TAP2
REACTOME_GAP_FILLING_DNA_REPAIR_SYNTHESIS_AND_LIGATION_IN_GG_NER	REACTOME_GAP_FILLING_DNA_REPAIR_SYNTHESIS_AND_LIGATION_IN_GG_NER	23	0.555756	1.65153	0.00900988	0.0536346	0.0425642	2507	tags=48%, list=20%, signal=38%	RFC4/PCNA/POLE2/RFC2/POLD1/RFC3/POLD2/POLE3/RPA3/LIG1/RFC5
KEGG_PHENYLALANINE_METABOLISM	KEGG_PHENYLALANINE_METABOLISM	17	-0.627219	-1.68398	0.00905664	0.0537053	0.0426203	514	tags=29%, list=4%, signal=28%	NAA80/AOC3/MAOA/TAT/MAOB
KEGG_VIBRIO_CHOLERAE_INFECTION	KEGG_VIBRIO_CHOLERAE_INFECTION	49	0.45641	1.58602	0.00907634	0.0537053	0.0426203	3132	tags=47%, list=25%, signal=35%	PDIA4/PRKX/PLCG2/SEC61G/ATP6V0A4/ERO1A/SEC61A2/ATP6V0B/SEC61B/ATP6V1F/ATP6V1B1/TJP2/KDELR2/CFTR/PRKACB/PRKCA/PRKCG/SEC61A1/ATP6V0D1/GNAS/KDELR3/PRKACG/PRKCB
WP_METAPATHWAY_BIOTRANSFORMATION_PHASE_I_AND_II	WP_METAPATHWAY_BIOTRANSFORMATION_PHASE_I_AND_II	129	-0.380786	-1.4774	0.00911582	0.0538077	0.0427016	2068	tags=24%, list=17%, signal=20%	CYP20A1/NNMT/SULT1A2/CHST10/CYP2A13/GPX5/UGT2B15/GPX3/CYP1A1/NDST1/AKR1C3/CYP2A6/GSTZ1/CYP4F11/SULT1A1/AKR7A3/CYP7A1/CYP26A1/GSTM4/HNMT/GSTM2/GSTM1/NAA80/CYP21A2/GSTT2/CYP4F12/GSTM3/EPHX2/CYP4F8/CYP4B1/FMO5
KEGG_BLADDER_CANCER	KEGG_BLADDER_CANCER	41	0.486458	1.63453	0.0093277	0.0549247	0.043588	2379	tags=44%, list=19%, signal=36%	MMP1/MMP9/CXCL8/MYC/E2F1/CDKN2A/E2F3/CDK4/VEGFA/CDH1/MAP2K1/TYMP/EGFR/MAP2K2/EGF/MAPK1/DAPK1/NRAS
REACTOME_NUCLEAR_RECEPTOR_TRANSCRIPTION_PATHWAY	REACTOME_NUCLEAR_RECEPTOR_TRANSCRIPTION_PATHWAY	51	-0.478917	-1.59923	0.00946117	0.0555758	0.0441047	2356	tags=31%, list=19%, signal=25%	NR5A1/NCOR1/NR1D2/NR3C1/ESRRG/RXRG/RARA/HNF4G/NR4A2/NR5A2/PPARG/ESR1/RORC/NR3C2/AR/PGR
WP_INTRAFLAGELLAR_TRANSPORT_PROTEINS_BINDING_TO_DYNEIN	WP_INTRAFLAGELLAR_TRANSPORT_PROTEINS_BINDING_TO_DYNEIN	19	-0.628066	-1.72766	0.0095551	0.055992	0.044435	2610	tags=42%, list=21%, signal=33%	DYNLT3/IFT46/DYNC1I2/IFT22/DYNC2LI1/IFT140/WDR19/DYNC2H1
WP_ASPIRIN_AND_MIRNAS	WP_ASPIRIN_AND_MIRNAS	10	0.708854	1.67086	0.0096282	0.0562844	0.044667	1739	tags=50%, list=14%, signal=43%	PDK1/MVD/ABCC4/VEGFA/PTGS2
REACTOME_DEFECTIVE_INTRINSIC_PATHWAY_FOR_APOPTOSIS	REACTOME_DEFECTIVE_INTRINSIC_PATHWAY_FOR_APOPTOSIS	23	0.553775	1.64564	0.00968349	0.0564715	0.0448156	1445	tags=30%, list=12%, signal=27%	LMNB1/CDC25A/CDC25B/CDKN2A/CDC25C/PRDX1/CDK5
REACTOME_PEROXISOMAL_LIPID_METABOLISM	REACTOME_PEROXISOMAL_LIPID_METABOLISM	24	-0.580637	-1.69712	0.00974604	0.0567	0.0449969	3011	tags=58%, list=24%, signal=44%	SCP2/DECR2/MLYCD/PECR/ACAA1/ALDH3A2/SLC27A2/CRAT/ACOX3/HSD17B4/ECI2/ACBD4/ACOX2/CROT
REACTOME_POLYMERASE_SWITCHING_ON_THE_C_STRAND_OF_THE_TELOMERE	REACTOME_POLYMERASE_SWITCHING_ON_THE_C_STRAND_OF_THE_TELOMERE	23	0.552204	1.64097	0.0100203	0.0581561	0.0461524	1685	tags=43%, list=14%, signal=38%	DSCC1/RFC4/PCNA/POLA2/RFC2/PRIM1/PRIM2/POLD1/RFC3/POLD2
KEGG_CIRCADIAN_RHYTHM_MAMMAL	KEGG_CIRCADIAN_RHYTHM_MAMMAL	12	-0.673003	-1.6439	0.0102554	0.0593782	0.0471223	3525	tags=83%, list=29%, signal=60%	NPAS2/CSNK1E/ARNTL/PER1/CRY1/PER3/BHLHE41/BHLHE40/PER2/CRY2
REACTOME_PHASE_I_FUNCTIONALIZATION_OF_COMPOUNDS	REACTOME_PHASE_I_FUNCTIONALIZATION_OF_COMPOUNDS	88	-0.408909	-1.50374	0.0102982	0.0594843	0.0472065	2984	tags=34%, list=24%, signal=26%	CYP3A4/CYP26B1/CYP2E1/CYP2C8/CYP46A1/CYP2A7/PTGS1/NCOA2/FMO3/ARNT2/CYP2A13/CYP4A22/NCOA1/CYP1A1/CYP2A6/AHR/FDXR/CYP4F11/CYP7A1/ALDH1A1/CYP26A1/ADH1C/CYP21A2/AOC3/MAOA/CYP4F12/MAOB/ADH1B/CYP4F8/CYP4B1
REACTOME_COMMON_PATHWAY_OF_FIBRIN_CLOT_FORMATION	REACTOME_COMMON_PATHWAY_OF_FIBRIN_CLOT_FORMATION	22	-0.590117	-1.68512	0.0103755	0.0596471	0.0473357	1558	tags=36%, list=13%, signal=32%	PROC/F2R/PF4V1/CD177/PROS1/THBD/F13A1/SERPINA5
REACTOME_SUMOYLATION_OF_SUMOYLATION_PROTEINS	REACTOME_SUMOYLATION_OF_SUMOYLATION_PROTEINS	33	0.499179	1.62653	0.0103679	0.0596471	0.0473357	3299	tags=48%, list=27%, signal=36%	NUP93/NUP155/SEC13/NUP205/NDC1/NUP62/NUP88/NUP85/NUP50/RAE1/NUP42/NUP153/SEH1L/NUP107/NUP37/NUP58
REACTOME_HEDGEHOG_LIGAND_BIOGENESIS	REACTOME_HEDGEHOG_LIGAND_BIOGENESIS	57	0.444974	1.60192	0.0104101	0.0597041	0.0473809	2607	tags=51%, list=21%, signal=40%	PSMA7/PSMD3/PSMB9/PSMB5/PSMD7/PSME2/PSMB3/PSMA4/PSMB2/PSMA3/PSMA5/PSMB7/PSMD14/IHH/PSME4/SEM1/PSMB10/PSMD8/PSMC3/PSMD2/PSMB4/VCP/PSMC4/PSMA2/P4HB/PSMB6/PSMD12/PSMA1/PSMD10
WP_NONSMALL_CELL_LUNG_CANCER	WP_NONSMALL_CELL_LUNG_CANCER	70	0.403058	1.50698	0.010567	0.0604612	0.0479818	2438	tags=33%, list=20%, signal=27%	CRABP1/PDK1/E2F1/CDKN2A/PLCG2/CYCS/E2F3/BAK1/CDK4/BID/STK4/MAP2K1/TGFA/EGFR/MAP2K2/ALK/EGF/MAPK1/SOS1/EML4/PRKCA/NRAS/PRKCG
REACTOME_REGULATION_OF_PLK1_ACTIVITY_AT_G2_M_TRANSITION	REACTOME_REGULATION_OF_PLK1_ACTIVITY_AT_G2_M_TRANSITION	78	0.395201	1.51251	0.0105936	0.0604709	0.0479895	247	tags=10%, list=2%, signal=10%	CCNB2/NEK2/CDK1/AURKA/CCNB1/PLK1/PLK4/HAUS6
KEGG_MISMATCH_REPAIR	KEGG_MISMATCH_REPAIR	21	0.578033	1.67216	0.0106457	0.0606258	0.0481124	2507	tags=57%, list=20%, signal=46%	EXO1/RFC4/PCNA/MSH2/RFC2/MSH6/POLD1/RFC3/POLD2/RPA3/LIG1/RFC5
REACTOME_NITRIC_OXIDE_STIMULATES_GUANYLATE_CYCLASE	REACTOME_NITRIC_OXIDE_STIMULATES_GUANYLATE_CYCLASE	21	-0.599211	-1.69793	0.0108719	0.0617689	0.0490196	3679	tags=57%, list=30%, signal=40%	NOS3/GUCY1B1/PDE10A/GUCY1A1/GUCY1A2/KCNMB2/PDE5A/PRKG1/PDE1A/KCNMA1/PDE2A/ITPR1
REACTOME_KERATAN_SULFATE_BIOSYNTHESIS	REACTOME_KERATAN_SULFATE_BIOSYNTHESIS	25	-0.565372	-1.66827	0.0109619	0.0619898	0.0491949	945	tags=24%, list=8%, signal=22%	LUM/PRELP/FMOD/KERA/OMD/OGN
REACTOME_FATTY_ACID_METABOLISM	REACTOME_FATTY_ACID_METABOLISM	141	-0.370277	-1.46598	0.0109532	0.0619898	0.0491949	1922	tags=26%, list=16%, signal=22%	ACADS/PRKAA2/CYP4A22/ACADVL/ALDH3A2/HPGD/CYP1A1/SCD5/ACSL3/AKR1C3/PCCA/HPGDS/ACAD10/SLC27A2/ACADL/ELOVL4/HSD17B8/SLC22A5/CYP4F11/CRAT/FAAH/ELOVL5/ACOX3/HSD17B4/CBR4/ECI2/ACBD4/ACSF2/ACACB/ACOX2/ALOX15B/CROT/LTC4S/ELOVL2/EPHX2/CYP4F8/CYP4B1
REACTOME_THE_ROLE_OF_NEF_IN_HIV_1_REPLICATION_AND_DISEASE_PATHOGENESIS	REACTOME_THE_ROLE_OF_NEF_IN_HIV_1_REPLICATION_AND_DISEASE_PATHOGENESIS	24	0.54644	1.63904	0.0114319	0.0644972	0.0511847	3722	tags=54%, list=30%, signal=38%	LCK/HCK/CD247/DOCK2/CD28/AP1S1/AP1G1/AP2S1/AP1B1/CD8B/CD4/AP2M1/HLA-A
KEGG_BASAL_CELL_CARCINOMA	KEGG_BASAL_CELL_CARCINOMA	46	-0.483061	-1.6032	0.0117693	0.0657886	0.0522095	2704	tags=39%, list=22%, signal=31%	DVL2/FZD8/FZD1/CTNNB1/TP53/FZD2/FZD4/GLI1/WNT5A/APC/FZD10/WNT2B/SHH/WNT5B/WNT11/WNT4/GLI3/BMP4
REACTOME_RRNA_MODIFICATION_IN_THE_NUCLEUS_AND_CYTOSOL	REACTOME_RRNA_MODIFICATION_IN_THE_NUCLEUS_AND_CYTOSOL	51	0.438026	1.53997	0.0117675	0.0657886	0.0522095	3972	tags=55%, list=32%, signal=37%	PNO1/NOP2/RRP7A/PWP2/EMG1/GAR1/UTP11/RRP9/DDX49/NOP10/WDR43/SNU13/FBL/BUD23/PDCD11/UTP18/NHP2/NOL11/IMP4/UTP6/NAT10/DDX47/WDR3/HEATR1/RCL1/NOC4L/UTP20/BMS1
REACTOME_MITOCHONDRIAL_TRANSLATION	REACTOME_MITOCHONDRIAL_TRANSLATION	62	0.41709	1.51554	0.0117482	0.0657886	0.0522095	3977	tags=55%, list=32%, signal=37%	MRPS17/MRPL15/MRPL13/MRPL12/MRPS33/MRPL48/MRPS12/MRPS7/MRPL42/MRPS15/MRPL3/GADD45GIP1/MRPS18A/MRPL11/MRPL2/MRPL20/MRPL9/MRPL17/MRPL19/DAP3/MRPL33/MRPL18/MRPL4/MRPL35/MRPL39/MRPS11/MRPS2/MRPS34/MRPL44/MRPL23/MRPL58/MRPS16/GFM1/MTIF2
REACTOME_TRANSCRIPTIONAL_REGULATION_BY_RUNX1	REACTOME_TRANSCRIPTIONAL_REGULATION_BY_RUNX1	172	0.306139	1.33129	0.0117355	0.0657886	0.0522095	2607	tags=33%, list=21%, signal=26%	CTSV/CTLA4/IL2RA/H2AZ1/H2BC12/PSMA7/PSMD3/PSMB9/H2BC11/H3C10/PSMB5/IFNG/PSMD7/PSME2/PSMB3/CBX2/PSMA4/PSMB2/PSMA3/PSMA5/PSMB7/CTSL/PSMD14/H2BC9/PSME4/SEM1/PRKCQ/CBFB/PRMT1/ACTL6A/H2BC3/PSMB10/PSMD8/PSMC3/H2AX/NR4A3/PSMD2/ITCH/CR1/PSMB4/PSMC4/SOCS3/PSMA2/CSNK2B/NFE2/H2AC4/PSMB6/ITGA2B/LMO1/PML/H2AC14/PSMD12/IL2/PSMA1/SMARCA4/PSMD10
REACTOME_ANCHORING_FIBRIL_FORMATION	REACTOME_ANCHORING_FIBRIL_FORMATION	15	-0.629218	-1.65414	0.0122059	0.0679656	0.0539372	1861	tags=53%, list=15%, signal=45%	TLL1/TLL2/COL4A6/COL1A2/COL1A1/COL7A1/LAMA3/COL4A5
BIOCARTA_ASBCELL_PATHWAY	BIOCARTA_ASBCELL_PATHWAY	12	0.658967	1.63155	0.0122148	0.0679656	0.0539372	3595	tags=75%, list=29%, signal=53%	HLA-DRB4/CD40LG/CD28/FASLG/CD40/IL2/HLA-DRA/CD4/CD80
REACTOME_GLUTAMATE_NEUROTRANSMITTER_RELEASE_CYCLE	REACTOME_GLUTAMATE_NEUROTRANSMITTER_RELEASE_CYCLE	23	-0.58522	-1.68997	0.0124282	0.0689947	0.0547539	2123	tags=35%, list=17%, signal=29%	ARL6IP5/UNC13B/TSPOAP1/VAMP2/GLS2/STXBP1/SYT1/SLC1A1
REACTOME_RHO_GTPASES_ACTIVATE_NADPH_OXIDASES	REACTOME_RHO_GTPASES_ACTIVATE_NADPH_OXIDASES	21	0.570485	1.65033	0.0126575	0.0701076	0.0556371	1294	tags=29%, list=10%, signal=26%	S100A9/S100A8/CYBA/NCF2/NCF4/RAC2
REACTOME_ASSEMBLY_OF_THE_ORC_COMPLEX_AT_THE_ORIGIN_OF_REPLICATION	REACTOME_ASSEMBLY_OF_THE_ORC_COMPLEX_AT_THE_ORIGIN_OF_REPLICATION	29	0.534389	1.68477	0.0127829	0.0706406	0.0560601	1622	tags=31%, list=13%, signal=27%	ORC6/ORC1/H2AZ1/H2BC12/H2BC11/H3C10/H2BC9/H2BC3/H2AX
REACTOME_SYNTHESIS_OF_ACTIVE_UBIQUITIN_ROLES_OF_E1_AND_E2_ENZYMES	REACTOME_SYNTHESIS_OF_ACTIVE_UBIQUITIN_ROLES_OF_E1_AND_E2_ENZYMES	26	0.528604	1.62257	0.0129034	0.0711449	0.0564603	52	tags=8%, list=0%, signal=8%	UBE2C/UBE2S
REACTOME_G_ALPHA_I_SIGNALLING_EVENTS	REACTOME_G_ALPHA_I_SIGNALLING_EVENTS	255	0.274272	1.25961	0.0130284	0.0716711	0.0568779	1972	tags=21%, list=16%, signal=18%	NMU/CXCL10/CXCL13/CXCL11/CXCL9/CXCL3/CCL20/GABBR2/CXCL8/CCL5/CXCR6/GPSM2/CCR1/KPNA2/CCL4/CCR8/SSTR1/CCR7/ADCY8/FPR3/PRKX/GAL/GPR18/HTR1B/PPP1CA/GPR183/CCR5/CHRM4/GPR17/CXCL5/S1PR5/CXCL1/S1PR4/GNGT1/TAS2R7/CCL16/RGS20/CCL13/RGS19/GNAT2/CDK5/PMCH/MTNR1A/PYY/RGS1/CXCR4/RGS16/SSTR5/OPN3/PDE4B/LPAR3/GNG5/CX3CL1/PDE1C
WP_TYROBP_CAUSAL_NETWORK_IN_MICROGLIA	WP_TYROBP_CAUSAL_NETWORK_IN_MICROGLIA	50	0.441162	1.53075	0.0130867	0.0718287	0.0570029	2212	tags=44%, list=18%, signal=36%	PLEK/BIN2/RUNX3/NCF2/ABCC4/ITGB2/SFT2D2/SPP1/SAMSN1/SLC1A5/APBB1IP/SLC7A7/IGSF6/RGS1/CD37/RNASE6/NCKAP1L/ELF4/TYROBP/TNFRSF1B/HCLS1/IL10RA
BIOCARTA_SM_PATHWAY	BIOCARTA_SM_PATHWAY	14	0.649125	1.69739	0.0131797	0.0721758	0.0572784	1804	tags=71%, list=15%, signal=61%	SNRPA1/SNRPD3/SNRPC/SNRPD1/SNRPF/SNRPG/SNRPA/SNRPB/SRSF2/SNRPB2
WP_CHOLESTEROL_SYNTHESIS_DISORDERS	WP_CHOLESTEROL_SYNTHESIS_DISORDERS	17	0.608957	1.66134	0.0136495	0.0743737	0.0590226	1042	tags=41%, list=8%, signal=38%	DHCR7/MVD/SQLE/IDI1/LBR/FDPS/EBP
REACTOME_IRAK4_DEFICIENCY_TLR2_4	REACTOME_IRAK4_DEFICIENCY_TLR2_4	17	0.607969	1.65864	0.0136495	0.0743737	0.0590226	1682	tags=29%, list=14%, signal=25%	S100A9/S100A8/TLR1/CD14/TLR2
REACTOME_FORMATION_OF_FIBRIN_CLOT_CLOTTING_CASCADE	REACTOME_FORMATION_OF_FIBRIN_CLOT_CLOTTING_CASCADE	38	-0.504579	-1.61888	0.0137036	0.0743737	0.0590226	2325	tags=47%, list=19%, signal=39%	TFPI/PROCR/F8/KNG1/A2M/SERPING1/F7/PRCP/PROC/VWF/F2R/PF4V1/CD177/PROS1/THBD/F13A1/F3/SERPINA5
KEGG_TYPE_II_DIABETES_MELLITUS	KEGG_TYPE_II_DIABETES_MELLITUS	44	-0.476641	-1.56563	0.0136792	0.0743737	0.0590226	2226	tags=30%, list=18%, signal=24%	CACNA1E/MAPK3/IRS2/PIK3R1/INSR/PRKCZ/SOCS2/ABCC8/CACNA1C/IKBKB/IRS1/CACNA1D/ADIPOQ
WP_CLEAR_CELL_RENAL_CELL_CARCINOMA_PATHWAYS	WP_CLEAR_CELL_RENAL_CELL_CARCINOMA_PATHWAYS	78	0.390316	1.49381	0.013781	0.0746267	0.0592234	1857	tags=31%, list=15%, signal=26%	PGBD5/PSAT1/PHGDH/PFKP/ME1/LDHB/SHMT2/HK3/LDHC/GPI/PSPH/TPI1/GAPDH/PGK1/ENO1/VHL/SLC2A1/MDH1/VEGFA/PKM/SDS/HIF1A/HK2/EGFR
[truncated: 147 more rows]

## Sheet: 3.BLCA
ID	Description	setSize	enrichmentScore	NES	pvalue	p.adjust	qvalue	rank	leading_edge	core_enrichment
[truncated: 546 more rows]

[truncated: 33 more sheets: 4.BRCA, 5.CESC, 6.CHOL, 7.COAD, 8.DLBC, 9.ESAD, 10.ESCA, 11.ESCC, 12.GBM, 13.HNSC, 14.KICH, 15.KIRC, 16.KIRP, 17.LGG, 18.LIHC, 19.LUAD, 20.LUSC, 21.MESO, 22.OSCC, 23.OV …]
