# Supplementary material for: DEP domain containing 1: a potential oncogenic driver
Source: Biol Res. 2025 Oct 8;58:64. doi: 10.1186/s40659-025-00643-0 (PMC12505635; doi:10.1186/s40659-025-00643-0)
Supplement: Supplementary file 4 — Supplementary Material 4 [file 40659_2025_643_MOESM4_ESM.xlsx]

## Sheet: TF
Gene card	HumanTFDB	hTFtarget	CistromeDB Toolkit	JASPAR	ENCODE	GTRD	ChIP_Atlas	KNOCKTF2.0 (upregulate)	KNOCKTF2.0 (downregulate)
SP1	POU5F1	SPI1	ZNF786	ZNF454	ATF3	AFF1	AFF1	FOXA1	GABPA
MGA	FOXO3	ATF3	EHMT2	TFAP2C	BACH1	AFF4	AFF4	HOXA1	SNAI2
ZBTB26	BRD4	BHLHE40	RUNX1	TFAP2A	BCLAF1	AGO1	AHDC1	ZNF85	SRF
POLR2A	ETV4	BRD4	TRIM28	ZNF460	BHLHE40	AHR	AKAP8	ZNF431	NFKBIZ
HCFC1	BRCA1	CBFB	SUPT5H	SP5	BRCA1	AR	AR	GATA2	ETV5
UBTF	ZNF250	CDK7	LMNA	Hic1	CBX3	ARID2	ARHGAP35	CREB1	CREBBP
PML	MBD3	CDK9	ZNF273	ZNF708	CCNT2	ARID4B	ARID2	JUN	ZFP36L1
HIC1	ESR1	CTCF	POLR2A	ESR2	CEBPB	ARNT	ARID4A	MYC	E2F1
MYC	NFATC1	E2F1	TET2	ARNT::HIF1A	CHD1	ARNTL	ARID4B	AR	GLI1
CEBPB	HIF1A	E2F4	ZBTB17	MGA	CHD2	ARRB1	ARID5B	ZIC5	ZNF213
ATF2	MYC	ELF1	IRF4	TBX15	CHD7	ASF1A	ASCL1	POSTN	ILF2
MLLT1	RNF2	EP300	INTS3	TBX1	CREB1	ATF1	ASCL2	TFAP4	BMI1
MAX	EP300	ERG	CHD1	TBX4	CTCF	ATF3	ASF1A	NR2E1	EHF
YY1	FOXA1	FLI1	CTCF	TBX5	E2F4	ATRX	ASH2L	OVOL2	FOXK2
TCF12	DDX5	GATA2	SMAD3	NR2C2	E2F6	BACH1	ASPSCR1	GTF2B	MAEL
TBP	ARNT	HDAC1	SNAI2	KLF1	EGR1	BCL11A	ATF1	RBM17	FOXP3
KLF11	BRD3	HDAC2	SETDB1	KLF14	ELF1	BCL11B	ATF3	RBFOX2	PURA
MBD2	BCL3	KLF1	GATA1	THRB	ELK1	BCL6	BCL11B	FIP1L1	SMARCA1
MXD4	HOXA6	LMO2	RELA	INSM1	EP300	BHLHE40	BCL3	HDGF	NKRF
IRF2	KLF4	MAX	NUP98	HOXB6	ETS1	BRCA1	BCL6	SSB
SMAD5	WHSC1	MAZ	NEUROD1	ZNF257	EZH2	BRD2	BCOR	ZNF622
MNT	SP2	MED1	RAD51	FOS	FLI1	BRD3	BCORL1	RBM39
BHLHE40	BRD2	MXI1	CEBPB	BNC2	FOS	BRD4	BHLHE40	BCLAF1
SIN3A	FOXK1	NFYB	ZNF618	Nr2e1	FOXM1	BRD7	BMI1	U2AF2
RAD51	AR	PAX5	FOXM1	NR2C1	FOXP2	BRD9	BRD1	TARDBP
ZNF610	KDM1A	PML	E2F4	FOSB::JUNB	GATA1	BRPF3	BRD2	EWSR1
HOMEZ	EGR1	POLR2A	KRAB	FOSL2	GATA2	CBFA2T2	BRD3	PCBP2
SIN3B	SUZ12	RUNX1	SMARCA4	NFATC3	GATA3	CBX1	BRD4	HNRNPLL
REST	KLF1	SIN3A	AR	POU5F1B	GTF2B	CBX2	BRD7	SNRNP70
TAF9B	NCOR1	SP1	AGO1	NEUROG1	GTF2F1	CBX3	BRD9	SRSF3
CTBP1	TP53	SPIB	ZNF711	OLIG3	H2AFZ	CCND2	BRPF3	PRPF4
SMAD4	NFAT5	STAG1	CDK8	TEAD3	HCFC1	CCNT2	CBFA2T2	ZFX
SAP130	EPAS1	TAF1	ZNF682	MEIS2	HDAC1	CDK7	CBFB	ATOH8
DEAF1	IRF3	TBP	CDK9	MEIS3	HDAC2	CDK8	CBX1	HMGA1
ZBTB5	SMARCA4	TCF12	TAL1	KLF7	HDAC6	CDK9	CC2D1A	RELB
ZNF341	STAT5A	TCF3	CBX3	CTCFL	HMGN3	CDKN1B	CCNT2	SP1
USF2	GRHL3	USF1	MITF	TCF4	IRF1	CDX2	CDK8	TFAP2C
KMT2B	BTAF1	USF2	NPAT	ZEB1	IRF3	CEBPA	CDK9	TP63
ZNF843	ZNF384	YY1	TCF7L1	Zic1::Zic2	JUN	CEBPB	CDKN1B	TWIST1
DMAP1	BCOR	ETS1	FOXA1	OSR1	JUND	CEBPD	CDT1	EZH2
SKIL	RELA	FOXM1	ZBTB7A	Gmeb1	KDM1A	CENPA	CDYL2	PRMT1
BCL6	CREB1	MYC	MORC2	ZNF417	KDM4A	CHD2	CHAMP1	ESR1
SP2	STAT3	CBX3	MED1	GMEB2	KDM5A	CHD4	CHD1	ARID2
HLTF	IRF1	CREB1	EP300	GSX2	KDM5B	CHD7	CHD2	DNMT1
TARDBP	BRD7	CTCFL	ZBTB48	HOXA1	MAFK	CHD8	CHD6	YY1
NKRF	POLR2A	E2F6	CHD4	HOXA4	MAX	CNOT3	CHD8	CDK7
ZSCAN5A	SPI1	EGR1	ZFX	E2F8	MAZ	CREB1	CIC	E2F6
KLF16	REST	FOS	BRD4	E2F1	MTA3	CREBBP	CNOT3	E2F2
CBX1	ELF1	GATA1	PIAS1	RFX7	MXI1	CREM	CPSF2	USP7
GTF2F1	ETS1	HEY1	SP140	Ahr::Arnt	MYBL2	CRTC2	CPSF4	FOXA2
SUPT5H	ERG	IRF1	DPF1	Zfx	MYC	CTCF	CPSF6	SETDB1
ZNF2	PBX1	JUND	HDAC1	FERD3L	NANOG	CTCFL	CREB1	CBX2
ASH2L	NOTCH1	KDM5B	SRF	ZNF610	NELFE	CXXC1	CREBBP	SOX9
SMARCA4	MED1	KMT2A	SUZ12	HINFP	NFE2	CXXC4	CRTC2	NFX1
ZFP37	HIVEP2	NFYA	USF2	ELK4	NFIC	DCP1A	CTCF	CNOT7
ELF1	BCL6	PHF8	PHF2	MYB	NFYA	DDIT3	CTCFL	ABT1
ZNF189	PPARD/PPARG	RBBP5	ZNF674	IRF6	NFYB	DEK	CXXC5	CALR
ZBTB48	MYB	REST	FOS	NFIA	NR2F2	DMAP1	DDIT3	NPM1
FOXK2	TCF12	UBTF	PR	ETV3	NRF1	DRAP1	DEAF1
FOXM1	HCFC1	ZBTB7A	ZNF284	NR2F1		E2F1	DMAP1
HBP1	CDK9	ZNF263	H2AZ	PLAG1		E2F4	DOT1L
NRF1	DMRT2	NRF1	SCML2	Plagl1		E2F5	DPF2
RBPJ	GMEB1	ZFX	RNF2	TFDP1		E2F6	DRAP1
HDAC2	THAP11	AR	ZNF430	E2F6		E2F8	DZIP1
TAF7	TCF4	ARNT	MYCN	ZNF281		EBF1	E2F1
IKZF1	ZNF143	CEBPB	KDM5B	SP1		EED	E2F4
ZNF48	KDM5B	CREBBP	MXD3	SP2		EGR2	E2F5
EP400	ZNF274	ESR1	ZNF793	SP4		EGR3	E2F6
GATAD1	ZBTB33	FOXA1	ATF3	KLF12		EHMT2	EEA1
CHAMP1	HOXA10	GRHL2	KDM1A	KLF10		ELF1	EGR1
TAF1	SIX5	PGR	CDK2	BARHL2		ELF3	EHMT2
ZSCAN29	GTF2I	TFAP2C	ZNF561	GSC2		ELL2	ELAVL1
ZNF664	TAF1	XBP1	CTCFL	OTX1		EP300	ELF1
BACH1	TAF3	RAD21	RAD21	POU2F2		EP400	EMSY
CBLL2	IRF5	CDX2	NKX3-1	POU3F1		EPAS1	EP300
ZHX1	GTF3C2	E2F3	YY1	POU2F3		ERCC3	ERG
NFYC	CBX3	E2F8	HOTAIR	LIN54		ERCC6	ESR1
RLF	SALL4	FOXD2	T	POU5F1		ERG	ETS1
ZBTB40	IRF7	GMEB2	ZSCAN29	POU2F1		ESR1	ETV5
ATF4	T	HOXA6	KDM2B	POU3F4		ETS1	ETV6
TOE1	TP73	MNT	SUMO2	Arid3a		ETV5	EZH2
SP7	ZBTB7B	NFAT5	ZEB1	Lhx4		EZH2	FLI1
GLIS1	PURA	SMC1A	RBL2	Lhx8		FIP1L1	FOS
TFAP4	E2F8	SMC3	ESR1	HOXA7		FLI1	FOSL1
L3MBTL2	TRIM28	TAF3	MECP2	POU3F2		FOS	FOSL2
HDAC1	HIVEP1	TAL1	SMAD2/3	TCFL5		FOSL2	FOXA1
SREBF1	FOXH1	TFDP1	PHF8	ZBTB14		FOXA1	FOXA2
ELK1	SP3	FOXA2	POLR2M	GSC		FOXA2	FOXK1
MEIS2	UBTF	FOXP1	ZNF84	NFYA		FOXM1	FOXL2
IKZF5	CDK8	KDM4A	TET1	NFYC		FOXP1	FOXM1
ZFX	CREBBP	NANOG	SIN3A	PITX1		FUS	FOXO1
KLF1	FOXA2	POU5F1	NFE2	RHOXF1		GABPA	FOXP1
PRDM4	STAT1	SAP30	SREBF1	PITX2		GABPB1	FOXP2
GMEB1	ELSPBP1	SMAD1	NIPBL	THRA		GATA1	FOXP4
E2F4	CTCF	SP4	SMC3	Nkx2-1		GATA2	GABPB1
NCOA6	OTX2	STAT3	CBFB	Npas4		GATA3	GATA1
ZNF580	SMAD2/SMAD3	TAF7	NELFA	USF1		GATA4	GATA2
CREB1	SMAD3	TRIM28	NANOG	CREB3		GATA6	GATA3
KDM3A	EOMES	MITF	GRIP1	HIF1A		GATAD1	GATAD1
GABPB1	LMO2	EZH1	HMBOX1	TFEC		GATAD2A	GATAD2B
CREM	GABPA	BMI1	IRAK1	FOS::JUN		GATAD2B	GLIS1
TRIM28	NANOG	SUMO2		FOSL2::JUND		GCM2	GLIS2
PHF20	EGR2	MAFF		DBP		GLIS1	GMEB1
PHF21A	HDAC2	MAFK		JDP2		GMEB2	GTF2E2
ARID4B	GATA1	NFE2		Creb5		GRHL2	GTF2F1
PKNOX1	SRF	SUZ12		Runx1		GRHL3	GTF3C5
ZXDB	ASCL2	NR3C1		ZNF768		GTF2F1	GZF1
ZBTB8A	P50:RELA-P65	RB1		Tfcp2l1		GTF3C2	HAND2
ATF1	SP1	RBL2		SP8		GTF3C5	HBP1
TGIF2	USF2	RELA		ERF::FIGLA		H2AFZ	HDAC1
SP3	SMAD4	NOTCH1		TFAP4::ETV1		HBP1	HDAC2
ATF3	TBP	ZNF711		ZBTB6		HDAC1	HES4
PATZ1	IRF4	WDR5		ZBTB12		HDAC2	HIF1A
OSR2	POU1F1	MYOD1		Ascl2		HDAC3	HIVEP1
LARP7	HDAC6	KDM4C		EGR1		HDGFL3	HMGB1
KAT8	PBX2	SOX2		ZNF449		HMGA1	HNRNPLL
ZNF354B	GATA3			VEZF1		HNRNPL	HOXB13
PRDM10	VDR			Gli2		HNRNPLL	HSF1
DPF2	IKZF1			ZNF740		HOMEZ	IKZF1
ZNF501	IRX4			Gli1		IKZF1	INTS12
PHF8	FOXM1			ZBTB7C		IRF4	JADE3
SKI	NFKB1			ZKSCAN3		KLF1	KLF10
ZNF335	E2F6			NKX6-3		KLF10	KLF11
	SOX2			Gfi1B		KMT2A	KMT2A
	RUNX1			SIX2		LARP7	KMT2D
	BCL11A			SIX1		ME1	MED1
				Six4
				ZBED2
				NFATC4
				Spz1
				Foxo1
				Foxj2
				ZNF701
				FOXL1
				FOXI1
				FOXO4
				FOXO6
				FOXP3
				Zic3
				Zic2
				Znf423
				ETV5::FOXO1
				RUNX3
				RUNX2
				HOXA9
				Wt1
				FOSL1
				FOSL1::JUNB
				BATF::JUN
				BATF3
				BATF
				BACH1
				ERF::FOXI1
				ERF::FOXO1
				FLI1::FOXI1
				FOXO1::ELK1
				FOXO1::ELK3
				FOXO1::FLI1
				GRHL1
				GRHL2
				IKZF1
				ETV5::FOXI1
				TFCP2
				FOXK1
				Foxo3
				FOXP2
				FOXK2
				Foxf1
				FOXD1
				FOXC1
				MZF1
				RXRG
				PITX3
				DPRX
				Vdr
				ATF2
				RORB
				RORA
				POU6F1
				VAX1
				HOXD3
				SOX4
				Smad4
				BARX2
				PHOX2A
				Nobox
				RAX
				EVX1
				EVX2
				GBX1
				GBX2
				mix-a
				EN1
				EMX1
				NKX6-2
				Msx3
				PRRX1
				Shox2
				UNCX
				VSX1
				Dlx3
				Dlx4
				DLX6
				Arid3b
				SATB1
				MEF2C
				SRY
				LHX2
				NKX6-1
				LHX9
				Bcl11B
				SOX10
				Sox11
				Hoxa13
				HOXD9
				Nkx3-2
				Stat5a::Stat5b
				RELB
				TEAD2
				TEAD4
				PAX4
				NR4A1
				NR4A2
				VSX2
				GATA1
				GATA2
				Gata3
				GATA4
				TRPS1
				GATA6
				OLIG1
				HOXA10
				ZNF680
				Mafb
				ZNF317
				NRL
				FOXD2
				ZNF214
				SCRT1
				SCRT2
				Stat2
				PRDM9
				MYOD1
				SNAI2
				Rbpjl
				HES7
				GFI1
				Stat5b
				TBX21
				ARGFX
				Sox3
				SOX8
				CEBPD
				CEBPA
				SOX12
				BARHL1
				DMRTA2
				DMRTC2
				DMRTA1
				LMX1B
				PHOX2B
				Pax7
				ZNF143
				FOXH1
				FOXB1
				ZNF682
				FOXA1
				Foxl2
				FOXG1
				FOXN3
				ERF::HOXB13
				FLI1::DRGX
				ZNF528
				ETV2::DRGX
				ETV5::DRGX
				ETV5::HOXA2
				Elf5
				SOX21
				FOXF2
				MEF2A
				Stat5a
				Lhx3
				HNF1B
				SPIC
				RFX5
				FOXO1::ELF1
				TGIF2LY
				PBX1
				GABPA
				ELF3
				Thap11
				ZBTB18
				GCM1
				ZNF354A
				NR1D2
				Prdm15
				IRF3
				IRF7
				IRF2
				Irf1
				TBX20
				TCF7L1
				POU4F1
				POU4F3
				GLI3
				POU4F2
				Hmx2
				Hmx3
				Ddit3::Cebpa
				Dux
				Spi1
				FEV
				ERF
				ETV2
				NFE2
				HOXD12::ELK1
				ELK1
				MAFF
				MAF::NFE2
				MAFG::NFE2L1
				ZNF211
				EGR2
				ZNF684
				KLF17
				RARA::RXRA
				NR1H4::RXRA
