# Supplementary material for: DEP domain containing 1: a potential oncogenic driver
Source: Biol Res. 2025 Oct 8;58:64. doi: 10.1186/s40659-025-00643-0 (PMC12505635; doi:10.1186/s40659-025-00643-0)
Supplement: Supplementary file 5 — Supplementary Material 5 [file 40659_2025_643_MOESM5_ESM.xlsx]

## Sheet: MIRNAs
MiRDB	TargetScanHuman_8.0	MiRWalk	DIANA-TarBase v9.0	DIANA-MicroT-CDS	StarBase	DIANA-TarBase v.8 (validated )	MiRtarbase(validated )
hsa-miR-5011-5p	hsa-miR-135a-5p	hsa-let-7a-5p	hsa-let-7a-5p	hsa-miR-96-5p	hsa-miR-17-5p	hsa-miR-196b-5p	hsa-miR-340-5p
hsa-miR-190a-3p	hsa-miR-135b-5p	hsa-let-7a-2-3p	hsa-let-7b-5p	hsa-miR-130a-5p	hsa-miR-19a-3p	hsa-miR-186-5p	hsa-miR-186-5p
hsa-miR-216a-5p	hsa-miR-96-5p	hsa-let-7b-5p	hsa-let-7i-5p	hsa-miR-26b-5p	hsa-miR-19b-3p	hsa-let-7d-5p	hsa-miR-215-5p
hsa-miR-4511	hsa-miR-1271-5p	hsa-let-7b-3p	hsa-let-7d-5p	hsa-miR-26a-5p	hsa-miR-20a-5p	hsa-miR-17-5p	hsa-miR-192-5p
hsa-miR-3121-3p	hsa-miR-182-5p	hsa-let-7c-5p	hsa-let-7e-5p	hsa-miR-135a-5p	hsa-miR-23a-3p	hsa-miR-129-5p	hsa-miR-331-3p
hsa-miR-194-3p	hsa-miR-26b-5p	hsa-let-7c-3p	hsa-let-7g-5p	hsa-miR-1297	hsa-miR-33a-5p	hsa-miR-130b-3p	hsa-miR-24-3p
hsa-miR-5696	hsa-miR-26a-5p	hsa-let-7d-5p	hsa-miR-130b-3p	hsa-miR-7161-3p	hsa-miR-93-5p	hsa-miR-19b-1-5p	hsa-miR-17-5p
hsa-miR-4789-3p	hsa-miR-4465	hsa-let-7e-5p	hsa-let-7c-5p	hsa-miR-1277-5p	hsa-miR-96-5p	hsa-miR-26b-3p	hsa-miR-5692a
hsa-miR-10397-3p	hsa-miR-1297	hsa-let-7e-3p	hsa-miR-19a-3p	hsa-miR-23a-3p	hsa-miR-106a-5p	hsa-miR-301a-3p	hsa-miR-4763-5p
hsa-miR-5683	hsa-miR-130a-5p	hsa-miR-17-3p	hsa-miR-19b-3p	hsa-miR-23b-3p	hsa-miR-199a-3p	hsa-miR-301b-3p	hsa-miR-5697
hsa-miR-33a-3p	hsa-miR-23b-3p	hsa-miR-19b-1-5p	hsa-miR-301b-3p	hsa-miR-23c	hsa-miR-129-5p	hsa-miR-629-3p	hsa-miR-6894-3p
hsa-miR-5692c	hsa-miR-23a-3p	hsa-miR-19b-2-5p	hsa-miR-196a-5p	hsa-miR-135b-5p	hsa-miR-182-5p	hsa-miR-93-5p	hsa-miR-590-3p
hsa-miR-5692b	hsa-miR-23c	hsa-miR-20a-5p	hsa-miR-34a-5p	hsa-miR-6857-5p	hsa-miR-218-5p	hsa-miR-106a-5p	hsa-miR-4282
hsa-miR-4307	hsa-miR-301b-3p	hsa-miR-21-3p	hsa-miR-98-5p	hsa-miR-5011-5p	hsa-miR-224-5p	hsa-miR-106b-5p	hsa-miR-142-3p
hsa-miR-369-3p	hsa-miR-4295	hsa-miR-24-1-5p	hsa-miR-124-3p	hsa-miR-4282	hsa-miR-23b-3p	hsa-miR-1295a	hsa-miR-1305
hsa-miR-186-5p	hsa-miR-454-3p	hsa-miR-24-3p	hsa-miR-301a-3p	hsa-miR-3121-3p	hsa-miR-124-3p	hsa-miR-130a-3p	hsa-miR-607
hsa-miR-6814-5p	hsa-miR-301a-3p	hsa-miR-24-2-5p	hsa-let-7f-5p	hsa-miR-216a-5p	hsa-miR-130a-3p	hsa-miR-132-3p	hsa-miR-374b-3p
hsa-miR-664b-3p	hsa-miR-130a-3p	hsa-miR-25-5p	hsa-miR-182-5p	hsa-miR-5683	hsa-miR-153-3p	hsa-miR-15a-3p	hsa-miR-4465
hsa-miR-1297	hsa-miR-3666	hsa-miR-26a-1-3p	hsa-miR-25-3p	hsa-miR-432-5p	hsa-miR-186-5p	hsa-miR-17-5p	hsa-miR-26b-5p
hsa-miR-3658	hsa-miR-130b-3p	hsa-miR-26b-3p	hsa-miR-93-5p	hsa-miR-590-3p	hsa-miR-190a-5p	hsa-miR-188-5p	hsa-miR-26a-5p
hsa-miR-579-3p	hsa-miR-410-3p	hsa-miR-32-3p	hsa-miR-103a-3p	hsa-miR-7856-5p	hsa-miR-106b-5p	hsa-miR-194-3p	hsa-miR-1297
hsa-miR-6077	hsa-miR-506-3p	hsa-miR-33a-5p	hsa-miR-106a-5p	hsa-miR-6868-3p	hsa-miR-301a-3p	hsa-miR-19a-5p	hsa-miR-5682
hsa-miR-4729	hsa-miR-124-3p.2	hsa-miR-92a-2-5p	hsa-miR-107	hsa-miR-4760-3p	hsa-miR-130b-3p	hsa-miR-1-3p	hsa-miR-585-5p
hsa-miR-130b-3p	hsa-miR-216a-5p	hsa-miR-93-3p	hsa-miR-130a-3p	hsa-miR-885-5p	hsa-miR-376c-3p	hsa-miR-200a-5p	hsa-miR-4698
hsa-miR-4661-5p	hsa-miR-6504-3p	hsa-miR-96-5p	hsa-miR-17-5p	hsa-miR-3163	hsa-miR-374a-5p	hsa-miR-20a-5p	hsa-miR-3163
hsa-miR-590-3p	hsa-miR-496.2	hsa-miR-96-3p	hsa-miR-454-3p	hsa-miR-548aj-3p	hsa-miR-376a-3p	hsa-miR-212-3p	hsa-miR-8063
hsa-miR-520e-5p	hsa-miR-125b-2-3p	hsa-miR-103a-3p	hsa-miR-92a-3p	hsa-miR-548x-3p	hsa-miR-342-3p	hsa-miR-21-3p	hsa-miR-6715b-3p
hsa-miR-6857-5p	hsa-miR-3692-3p	hsa-miR-103a-1-5p	hsa-miR-191-5p	hsa-miR-4639-5p	hsa-miR-384	hsa-miR-25-3p	hsa-miR-3159
hsa-miR-548p	hsa-miR-3973	hsa-miR-197-5p	hsa-miR-101-3p	hsa-miR-6083	hsa-miR-20b-5p	hsa-miR-32-5p	hsa-miR-6715a-3p
hsa-miR-135b-5p	hsa-miR-520g-3p	hsa-miR-197-3p	hsa-miR-20a-5p	hsa-miR-4729	hsa-miR-448	hsa-miR-363-3p	hsa-miR-6514-3p
hsa-miR-135a-5p	hsa-miR-520h	hsa-miR-198	hsa-miR-23a-3p	hsa-miR-4528	hsa-miR-410-3p	hsa-miR-367-3p	hsa-miR-493-5p
hsa-miR-96-5p	hsa-miR-374a-3p	hsa-miR-199a-5p	hsa-miR-23b-3p	hsa-miR-374a-5p	hsa-miR-376b-3p	hsa-miR-454-3p	hsa-miR-4473
hsa-miR-4803	hsa-miR-4729	hsa-miR-129-5p	hsa-miR-92b-3p	hsa-miR-3658	hsa-miR-487a-3p	hsa-miR-491-5p	hsa-miR-4671-3p
hsa-miR-659-3p	hsa-miR-5696	hsa-miR-129-1-3p	hsa-miR-16-5p	hsa-miR-1250-3p	hsa-miR-490-3p	hsa-miR-499a-3p	hsa-miR-4423-5p
hsa-miR-454-3p	hsa-miR-579-3p	hsa-miR-30c-2-3p	hsa-miR-18a-5p	hsa-miR-190a-3p	hsa-miR-432-5p	hsa-miR-501-5p	hsa-miR-19b-3p
hsa-miR-548c-3p	hsa-miR-664b-3p	hsa-miR-30d-5p	hsa-miR-194-5p	hsa-miR-4789-3p	hsa-miR-494-3p	hsa-miR-5100	hsa-miR-19a-3p
hsa-miR-664a-3p	hsa-miR-6815-3p	hsa-miR-7-1-3p	hsa-miR-26a-5p	hsa-miR-3606-3p	hsa-miR-495-3p	hsa-miR-548am-5p	hsa-miR-6747-3p
hsa-miR-5002-5p	hsa-miR-889-5p	hsa-miR-10b-5p	hsa-miR-26b-5p	hsa-miR-153-5p	hsa-miR-519d-3p	hsa-miR-548ax	hsa-miR-323a-3p
hsa-miR-26a-5p	hsa-miR-4330	hsa-miR-182-5p	hsa-miR-33b-5p	hsa-miR-585-5p	hsa-miR-516b-5p	hsa-miR-548c-5p	hsa-miR-495-5p
hsa-miR-6885-3p	hsa-miR-181b-5p	hsa-miR-183-5p	hsa-miR-96-5p	hsa-miR-4698	hsa-miR-506-3p	hsa-miR-548d-5p	hsa-miR-3646
hsa-miR-26b-5p	hsa-miR-181d-5p	hsa-miR-199b-5p	kshv-miR-K12-10a-3p	hsa-miR-3927-3p	hsa-miR-455-5p	hsa-miR-548l	hsa-miR-130a-3p
hsa-miR-301a-3p	hsa-miR-181a-5p	hsa-miR-204-5p	hsa-miR-106b-5p	hsa-miR-5002-5p	hsa-miR-577	hsa-miR-548o-5p	hsa-miR-130b-3p
hsa-miR-301b-3p	hsa-miR-181c-5p	hsa-miR-205-3p	hsa-miR-1301-3p	hsa-miR-148a-5p	hsa-miR-33b-5p	hsa-miR-548w	hsa-miR-4295
hsa-miR-3666	hsa-miR-4262	hsa-miR-211-5p	hsa-miR-15a-5p	hsa-miR-4766-5p	hsa-miR-668-3p	hsa-miR-589-3p	hsa-miR-301a-3p
hsa-miR-7856-5p	hsa-miR-221-3p	hsa-miR-211-3p	hsa-miR-33a-5p	hsa-miR-548c-3p	hsa-miR-454-3p	hsa-miR-873-3p	hsa-miR-454-3p
hsa-miR-4295	hsa-miR-222-3p	hsa-miR-215-3p	hsa-miR-423-5p	hsa-miR-182-5p	hsa-miR-769-5p	hsa-miR-874-3p	hsa-miR-301b-3p
hsa-miR-130a-3p	hsa-miR-6869-5p	hsa-miR-216a-3p	hsa-miR-532-5p	hsa-miR-579-3p	hsa-miR-199b-3p	hsa-miR-877-5p	hsa-miR-3666
hsa-miR-23a-3p	hsa-miR-8081	hsa-miR-221-3p	kshv-miR-K12-10b	hsa-miR-1237-3p	hsa-miR-130a-5p	hsa-miR-885-5p
hsa-miR-188-3p	hsa-miR-8055	hsa-miR-222-3p	ebv-miR-BART15	hsa-miR-936	hsa-miR-340-5p	hsa-miR-92a-3p
hsa-miR-23c	hsa-miR-617	hsa-miR-223-5p	hsa-miR-132-3p	hsa-miR-6873-3p	hsa-miR-300	hsa-miR-92b-3p
hsa-miR-3163	hsa-miR-499b-5p	hsa-miR-200b-5p	hsa-miR-141-5p	hsa-miR-1305	hsa-miR-190b	hsa-miR-124-3p
hsa-miR-6873-3p	hsa-miR-4477a	hsa-let-7g-5p	hsa-miR-142-5p	hsa-miR-4773	hsa-miR-885-5p	hsa-miR-155-5p
hsa-miR-23b-3p	hsa-miR-5680	hsa-let-7i-5p	hsa-miR-148a-3p	hsa-miR-186-5p	hsa-miR-543	hsa-miR-210-3p
hsa-miR-3148	hsa-miR-8066	hsa-let-7i-3p	hsa-miR-148a-5p	hsa-miR-6072	hsa-miR-374b-5p	hsa-miR-26a-5p
hsa-miR-12133	hsa-miR-183-5p.2	hsa-miR-15b-5p	hsa-miR-155-5p	hsa-miR-664a-3p	hsa-miR-301b-3p	hsa-miR-34a-5p
hsa-miR-3977	hsa-miR-3161	hsa-miR-23b-5p	hsa-miR-15b-5p	hsa-miR-1271-5p	hsa-miR-513c-5p	hsa-miR-494-3p
hsa-miR-1271-5p	hsa-miR-599	hsa-miR-122-5p	hsa-miR-183-5p	hsa-miR-3671	hsa-miR-1271-5p	hsa-miR-192-5p
hsa-miR-4773	hsa-miR-342-3p	hsa-miR-125b-5p	hsa-miR-193b-5p	hsa-miR-3692-3p	hsa-miR-1276	hsa-let-7b-5p
hsa-miR-4330	hsa-miR-5007-5p	hsa-miR-125b-1-3p	hsa-miR-200a-5p	hsa-miR-495-3p	hsa-miR-3121-3p	hsa-miR-103a-3p
hsa-miR-628-3p	hsa-miR-384	hsa-miR-128-1-5p	hsa-miR-203a-3p	hsa-miR-6831-5p	hsa-miR-3129-5p	hsa-miR-107
hsa-miR-12136	hsa-miR-3685	hsa-miR-130a-5p	hsa-miR-21-5p	hsa-miR-6730-5p	hsa-miR-3163	hsa-miR-10b-5p
hsa-miR-4465	hsa-miR-4461	hsa-miR-130a-3p	hsa-miR-219a-1-3p	hsa-miR-3976	hsa-miR-514b-5p	hsa-miR-126-3p
hsa-miR-4796-3p	hsa-miR-455-5p	hsa-miR-137-5p	hsa-miR-223-3p	hsa-miR-628-3p	hsa-miR-4295	hsa-miR-129-2-3p
hsa-miR-466	hsa-miR-136-3p	hsa-miR-145-5p	hsa-miR-25-5p	hsa-miR-8063	hsa-miR-3200-5p	hsa-miR-147a
hsa-miR-4796-5p	hsa-miR-5002-5p	hsa-miR-152-3p	hsa-miR-29a-3p	hsa-miR-6833-3p	hsa-miR-23c	hsa-miR-195-5p
hsa-miR-607	hsa-miR-548l	hsa-miR-191-5p	hsa-miR-324-3p	hsa-miR-3156-5p	hsa-miR-3666	hsa-miR-200b-3p
hsa-miR-4780	hsa-miR-548n	hsa-miR-191-3p	hsa-miR-32-5p	hsa-miR-506-3p	hsa-miR-4524a-5p	hsa-miR-203a-3p
hsa-miR-4671-3p	hsa-miR-548ac	hsa-miR-125a-5p	hsa-miR-340-5p	hsa-miR-4775	hsa-miR-4661-5p	hsa-miR-205-5p
hsa-miR-4694-3p	hsa-miR-548bb-3p	hsa-miR-125b-2-3p	hsa-miR-424-5p	hsa-miR-374b-5p	hsa-miR-5581-3p	hsa-miR-23b-3p
hsa-miR-1277-5p	hsa-miR-548h-3p	hsa-miR-129-2-3p	hsa-miR-660-5p	hsa-miR-5704	hsa-miR-5688	hsa-miR-34b-5p
hsa-miR-6072	hsa-miR-548z	hsa-miR-134-5p	ebv-miR-BART2-5p	hsa-miR-548e-5p	hsa-miR-1277-5p	hsa-miR-34c-5p
hsa-miR-548x-5p	hsa-miR-548d-3p	hsa-miR-134-3p	hsa-miR-125b-5p	hsa-miR-3152-5p	hsa-miR-892c-5p	hsa-miR-376a-5p
hsa-miR-548f-5p	hsa-miR-548am-3p	hsa-miR-149-3p	hsa-miR-126-3p	hsa-miR-5692a		hsa-miR-449a
hsa-miR-548g-5p	hsa-miR-548ae-3p	hsa-miR-184	hsa-miR-1271-5p	hsa-miR-4699-5p		hsa-miR-449b-5p
hsa-miR-6833-3p	hsa-miR-548ah-3p	hsa-miR-185-5p	hsa-miR-129-2-3p	hsa-miR-34a-3p
hsa-miR-548aj-5p	hsa-miR-548aq-3p	hsa-miR-186-3p	hsa-miR-139-5p	hsa-miR-548p
hsa-miR-4314	hsa-miR-548j-3p	hsa-miR-320a-5p	hsa-miR-1-3p	hsa-miR-664b-3p
hsa-miR-6868-3p	hsa-miR-548aj-3p	hsa-miR-1-5p	hsa-miR-147a	hsa-miR-513a-3p
hsa-miR-4775	hsa-miR-548x-3p	hsa-miR-106b-5p	hsa-miR-148b-3p	hsa-miR-6815-3p
hsa-miR-4768-5p	hsa-miR-3152-3p	hsa-miR-29c-3p	hsa-miR-148b-5p	hsa-miR-5197-3p
hsa-miR-124-3p	hsa-miR-5191	hsa-miR-30c-1-3p	hsa-miR-151a-3p	hsa-miR-4716-5p
hsa-miR-506-3p	hsa-miR-1243	hsa-miR-101-2-5p	hsa-miR-16-1-3p	hsa-miR-3136-5p
hsa-miR-6757-5p	hsa-miR-3654	hsa-miR-34c-5p	hsa-miR-17-3p	hsa-miR-670-3p
hsa-miR-103a-2-5p	hsa-miR-3614-3p	hsa-miR-301a-3p	hsa-miR-181a-2-3p	hsa-miR-4778-3p
hsa-miR-103a-1-5p	hsa-miR-433-3p	hsa-miR-130b-3p	hsa-miR-181a-5p	hsa-miR-4422
hsa-miR-4724-5p	hsa-miR-585-5p	hsa-miR-26a-2-3p	hsa-miR-185-5p	hsa-miR-5692b
hsa-miR-6529-5p	hsa-miR-5682	hsa-miR-362-5p	hsa-miR-188-5p	hsa-miR-5692c
hsa-miR-203b-3p	hsa-miR-374b-3p	hsa-miR-365a-5p	hsa-miR-192-5p	hsa-miR-5697
hsa-miR-374a-5p	hsa-miR-590-3p	hsa-miR-302b-3p	hsa-miR-195-5p	hsa-miR-454-3p
hsa-miR-4528	hsa-miR-4282	hsa-miR-302c-3p	hsa-miR-196b-5p	hsa-miR-548n
hsa-miR-12117	hsa-miR-3163	hsa-miR-302d-3p	hsa-miR-19b-1-5p	hsa-miR-450a-2-3p
hsa-miR-6875-3p	hsa-miR-5692a	hsa-miR-370-5p	hsa-miR-204-5p	hsa-miR-5580-3p
hsa-miR-6891-3p	hsa-miR-5697	hsa-miR-371a-3p	hsa-miR-205-5p	hsa-miR-4330
hsa-miR-4639-5p	hsa-miR-8063	hsa-miR-373-3p	hsa-miR-20b-5p	hsa-miR-6757-5p
hsa-miR-5582-5p	hsa-miR-4698	hsa-miR-374a-3p	hsa-miR-210-3p	hsa-miR-4662a-3p
hsa-miR-708-3p	hsa-miR-607	hsa-miR-375-5p	hsa-miR-212-3p	hsa-miR-4803
hsa-miR-7158-3p	hsa-miR-1305	hsa-miR-377-5p	hsa-miR-27b-3p	hsa-miR-6818-3p
hsa-miR-619-5p	hsa-miR-4328	hsa-miR-378a-3p	hsa-miR-29b-3p	hsa-miR-323a-3p
hsa-miR-6506-5p	hsa-miR-6854-5p	hsa-miR-379-3p	hsa-miR-29c-3p	hsa-miR-513c-3p
hsa-miR-6831-5p	hsa-miR-4773	hsa-miR-380-3p	hsa-miR-30a-5p	hsa-miR-4768-5p
hsa-miR-4328	hsa-miR-4511	hsa-miR-383-3p	hsa-miR-30b-5p	hsa-miR-124-3p
hsa-miR-4789-5p	hsa-miR-548b-3p	hsa-miR-340-3p	hsa-miR-30c-5p	hsa-miR-19b-3p
hsa-miR-4477b	hsa-miR-3658	hsa-miR-330-5p	hsa-miR-30d-5p	hsa-miR-498
hsa-miR-4760-3p	hsa-miR-3653-3p	hsa-miR-331-5p	hsa-miR-30e-3p	hsa-miR-6814-5p
hsa-miR-7161-3p	hsa-miR-7856-5p	hsa-miR-331-3p	hsa-miR-30e-5p	hsa-miR-617
hsa-miR-374b-3p	hsa-miR-513a-3p	hsa-miR-324-5p	hsa-miR-31-5p	hsa-miR-466
hsa-miR-885-5p	hsa-miR-3606-3p	hsa-miR-324-3p	hsa-miR-335-3p	hsa-miR-548l
hsa-miR-6083	hsa-miR-513c-3p	hsa-miR-345-3p	hsa-miR-34b-5p	hsa-miR-6832-5p
hsa-miR-6729-3p	hsa-miR-577	hsa-miR-424-3p	hsa-miR-34c-5p	hsa-miR-452-3p
hsa-miR-5704	hsa-miR-3678-3p	hsa-miR-20b-5p	hsa-miR-374a-5p	hsa-miR-19a-3p
hsa-miR-4666b	hsa-miR-1273h-3p	hsa-miR-20b-3p	hsa-miR-374b-5p	hsa-miR-577
hsa-miR-4698	hsa-miR-6516-5p	hsa-miR-448	hsa-miR-375-3p	hsa-miR-4762-5p
hsa-miR-374b-5p	hsa-miR-5589-3p	hsa-miR-450a-1-3p	hsa-miR-378a-3p	hsa-miR-5681a
hsa-miR-8063	hsa-miR-589-3p	hsa-miR-433-3p	hsa-miR-378c	hsa-miR-7702
hsa-miR-589-3p	hsa-miR-1285-5p	hsa-miR-329-3p	hsa-miR-3934-5p	hsa-miR-28-3p
hsa-miR-432-5p	hsa-miR-889-3p	hsa-miR-451a	hsa-miR-449a	hsa-miR-1253
hsa-miR-6880-5p	hsa-miR-664a-3p	hsa-miR-452-3p	hsa-miR-449b-5p	hsa-miR-5581-3p
hsa-miR-1253	hsa-miR-4760-3p	hsa-miR-409-5p	hsa-miR-4521	hsa-miR-3667-3p
hsa-miR-3927-3p	hsa-miR-3129-3p	hsa-miR-483-3p	hsa-miR-4745-5p	hsa-miR-221-3p
hsa-miR-1261	hsa-miR-5583-5p	hsa-miR-485-3p	hsa-miR-494-3p	hsa-miR-6770-5p
hsa-miR-4282	hsa-miR-548ax	hsa-miR-486-5p	hsa-miR-532-3p	hsa-miR-4774-3p
hsa-miR-5692a	hsa-miR-548ao-5p	hsa-miR-486-3p	hsa-miR-576-3p	hsa-miR-194-3p
hsa-miR-4763-5p	hsa-miR-374c-3p	hsa-miR-488-5p	hsa-miR-582-5p	hsa-miR-5688
hsa-miR-3976	hsa-miR-6837-3p	hsa-miR-489-5p	hsa-miR-584-5p	hsa-miR-6080
hsa-miR-548b-3p	hsa-miR-412-3p	hsa-miR-489-3p	hsa-miR-625-5p	hsa-miR-5094
hsa-miR-7976	hsa-miR-6754-3p	hsa-miR-490-3p	hsa-miR-627-5p	hsa-miR-6506-5p
hsa-miR-6080	hsa-miR-3671	hsa-miR-491-5p	hsa-miR-802	hsa-miR-410-3p
hsa-miR-302a-5p	hsa-miR-205-3p	hsa-miR-491-3p	hsa-miR-873-5p	hsa-miR-224-5p
hsa-miR-944	hsa-miR-944	hsa-miR-511-5p	hsa-miR-92a-1-5p	hsa-miR-4715-5p
hsa-miR-12116	hsa-miR-580-3p	hsa-miR-493-5p	hsa-miR-99b-3p	hsa-miR-4511
hsa-miR-6894-3p	hsa-miR-4251	hsa-miR-493-3p	kshv-miR-K12-9-3p	hsa-miR-3148
hsa-miR-5007-5p	hsa-miR-885-3p	hsa-miR-432-5p		hsa-miR-4659a-3p
	hsa-miR-7150	hsa-miR-193b-3p		hsa-miR-4659b-3p
	hsa-miR-5011-5p	hsa-miR-512-3p		hsa-miR-452-5p
	hsa-miR-1277-5p	hsa-miR-520f-5p		hsa-miR-10a-3p
	hsa-miR-6507-5p	hsa-miR-520f-3p		hsa-miR-1229-5p
	hsa-miR-186-5p	hsa-miR-519c-5p		hsa-miR-548az-5p
	hsa-miR-3148	hsa-miR-520a-5p		hsa-miR-4661-5p
	hsa-miR-6124	hsa-miR-520a-3p		hsa-miR-4275
	hsa-miR-4796-3p	hsa-miR-526b-5p		hsa-miR-593-3p
	hsa-miR-548t-5p	hsa-miR-519b-5p		hsa-miR-4465
	hsa-miR-548az-5p	hsa-miR-523-5p		hsa-miR-548t-5p
	hsa-miR-5694	hsa-miR-523-3p		hsa-miR-4307
	hsa-miR-383-5p.2	hsa-miR-518f-5p		hsa-miR-1298-5p
	hsa-miR-3121-3p	hsa-miR-526a-5p		hsa-miR-340-5p
	hsa-miR-190a-3p	hsa-miR-526a-3p		hsa-miR-4671-3p
	hsa-miR-5580-3p	hsa-miR-520c-5p		hsa-miR-2110
	hsa-miR-4789-3p	hsa-miR-520c-3p		hsa-miR-5696
	hsa-miR-466	hsa-miR-518c-5p		hsa-miR-892c-5p
	hsa-miR-4643	hsa-miR-518c-3p		hsa-miR-3666
	hsa-miR-4789-5p	hsa-miR-524-5p		hsa-miR-4287
	hsa-miR-4762-5p	hsa-miR-519d-5p		hsa-miR-1238-3p
	hsa-miR-548aa	hsa-miR-520d-5p		hsa-miR-222-5p
	hsa-miR-548ap-3p	hsa-miR-520g-5p		hsa-miR-27a-5p
	hsa-miR-548t-3p	hsa-miR-518e-5p		hsa-miR-6885-3p
	hsa-miR-3910	hsa-miR-518a-5p		hsa-miR-4753-3p
	hsa-miR-3714	hsa-miR-518d-5p		hsa-miR-2052
	hsa-miR-124-3p.1	hsa-miR-522-5p		hsa-miR-1468-3p
	hsa-miR-4477b	hsa-miR-519a-5p		hsa-miR-627-3p
	hsa-miR-5692b	hsa-miR-519a-3p		hsa-miR-455-5p
	hsa-miR-5692c	hsa-miR-527		hsa-miR-300
	hsa-miR-6857-5p	hsa-miR-516a-5p		hsa-miR-9-5p
	hsa-miR-4450	hsa-miR-500a-5p		hsa-miR-7152-5p
	hsa-miR-2110	hsa-miR-500a-3p		hsa-miR-1248
	hsa-miR-450a-2-3p	hsa-miR-501-5p
	hsa-miR-6810-5p	hsa-miR-501-3p
	hsa-miR-3150a-3p	hsa-miR-502-5p
	hsa-miR-6763-5p	hsa-miR-502-3p
	hsa-miR-4439	hsa-miR-504-3p
	hsa-miR-3136-5p	hsa-miR-506-3p
	hsa-miR-6855-3p	hsa-miR-507
	hsa-miR-4513	hsa-miR-509-3p
	hsa-miR-6857-3p	hsa-miR-510-5p
	hsa-miR-3646	hsa-miR-514a-5p
	hsa-miR-7-2-3p	hsa-miR-532-3p
	hsa-miR-7-1-3p	hsa-miR-455-3p
	hsa-miR-4724-5p	hsa-miR-551a
	hsa-miR-708-3p	hsa-miR-92b-5p
	hsa-miR-7844-5p	hsa-miR-556-3p
	hsa-miR-570-3p	hsa-miR-551b-5p
	hsa-miR-576-5p	hsa-miR-570-3p
	hsa-miR-6083	hsa-miR-574-5p
	hsa-miR-3682-5p	hsa-miR-583
	hsa-miR-4639-5p	hsa-miR-585-5p
	hsa-miR-4274	hsa-miR-589-5p
	hsa-miR-4519	hsa-miR-550a-5p
	hsa-miR-5582-5p	hsa-miR-593-3p
	hsa-miR-548an	hsa-miR-596
	hsa-miR-875-3p	hsa-miR-608
	hsa-miR-6128	hsa-miR-609
	hsa-miR-1299	hsa-miR-611
	hsa-miR-1298-3p	hsa-miR-613
	hsa-miR-3126-3p	hsa-miR-617
	hsa-miR-448	hsa-miR-619-5p
	hsa-miR-20a-3p	hsa-miR-619-3p
	hsa-miR-6728-3p	hsa-miR-622
	hsa-miR-593-3p	hsa-miR-623
	hsa-miR-6818-3p	hsa-miR-624-3p
	hsa-miR-6895-3p	hsa-miR-629-3p
	hsa-miR-4289	hsa-miR-630
	hsa-miR-382-3p	hsa-miR-636
	hsa-miR-4307	hsa-miR-639
	hsa-miR-6077	hsa-miR-641
	hsa-miR-7-5p	hsa-miR-646
	hsa-miR-3688-3p	hsa-miR-650
	hsa-miR-4780	hsa-miR-652-5p
	hsa-miR-6780b-3p	hsa-miR-449b-3p
	hsa-miR-623	hsa-miR-411-3p
	hsa-miR-4287	hsa-miR-549a-5p
	hsa-miR-4685-3p	hsa-miR-659-5p
	hsa-miR-6867-3p	hsa-miR-758-3p
	hsa-miR-7113-3p	hsa-miR-671-5p
	hsa-miR-4469	hsa-miR-668-5p
	hsa-miR-142-3p.2	hsa-miR-1224-3p
	hsa-miR-4255	hsa-miR-320b
	hsa-miR-142-3p.1	hsa-miR-320c
	hsa-miR-1229-5p	hsa-miR-1323
	hsa-miR-197-5p	hsa-miR-454-5p
	hsa-miR-3132	hsa-miR-1283
	hsa-miR-194-3p	hsa-miR-769-5p
	hsa-miR-5693	hsa-miR-766-5p
	hsa-miR-4276	hsa-miR-766-3p
	hsa-miR-30a-3p	hsa-miR-378d
	hsa-miR-30e-3p	hsa-miR-1298-5p
	hsa-miR-30d-3p	hsa-miR-1298-3p
	hsa-miR-29a-5p	hsa-miR-764
	hsa-miR-7976	hsa-miR-765
	hsa-miR-874-3p	hsa-miR-770-5p
	hsa-miR-146b-3p	hsa-miR-675-3p
	hsa-miR-3173-5p	hsa-miR-298
	hsa-miR-6799-3p	hsa-miR-891a-3p
	hsa-miR-580-5p	hsa-miR-450b-5p
	hsa-miR-6794-3p	hsa-miR-450b-3p
	hsa-miR-4639-3p	hsa-miR-890
	hsa-miR-668-3p	hsa-miR-541-3p
	hsa-miR-224-5p	hsa-miR-875-3p
	hsa-miR-376a-3p	hsa-miR-147b-3p
	hsa-miR-376b-3p	hsa-miR-887-3p
	hsa-miR-6884-3p	hsa-miR-665
	hsa-miR-1266-3p	hsa-miR-873-5p
	hsa-miR-769-5p	hsa-miR-873-3p
	hsa-miR-1303	hsa-miR-760
	hsa-miR-21-5p	hsa-miR-922
	hsa-miR-590-5p	hsa-miR-934
	hsa-miR-5579-3p	hsa-miR-935
	hsa-miR-4661-5p	hsa-miR-940
	hsa-miR-497-3p	hsa-miR-943
	hsa-miR-510-3p	hsa-miR-1183
	hsa-miR-3177-5p	hsa-miR-1225-3p
	hsa-miR-511-3p	hsa-miR-1226-3p
	hsa-miR-924	hsa-miR-1227-3p
	hsa-miR-627-5p	hsa-miR-1228-3p
	hsa-miR-1238-3p	hsa-miR-1236-5p
	hsa-miR-4687-3p	hsa-miR-1236-3p
	hsa-miR-4419b	hsa-miR-1237-3p
	hsa-miR-3929	hsa-miR-1238-5p
	hsa-miR-4478	hsa-miR-1291
	hsa-miR-1295b-3p	hsa-miR-1293
	hsa-miR-3945	hsa-miR-1304-5p
	hsa-miR-4253	hsa-miR-1247-5p
	hsa-miR-6862-5p	hsa-miR-1248
	hsa-miR-6860	hsa-miR-1249-5p
	hsa-miR-5189-5p	hsa-miR-1249-3p
	hsa-miR-3187-5p	hsa-miR-1256
	hsa-miR-1285-3p	hsa-miR-1258
	hsa-miR-612	hsa-miR-1260a
	hsa-miR-939-3p	hsa-miR-1262
	hsa-miR-6791-5p	hsa-miR-1266-5p
	hsa-miR-4292	hsa-miR-1266-3p
	hsa-miR-1291	hsa-miR-1275
	hsa-miR-6775-3p	hsa-miR-1281
	hsa-miR-4747-3p	hsa-miR-1288-5p
	hsa-miR-1295a	hsa-miR-1288-3p
	hsa-miR-5704	hsa-miR-1255b-5p
	hsa-miR-4280	hsa-miR-1255b-2-3p
	hsa-miR-3591-5p	hsa-miR-664a-3p
	hsa-miR-10b-3p	hsa-miR-1307-5p
	hsa-miR-3942-3p	hsa-miR-1538
	hsa-miR-5100	hsa-miR-103b
	hsa-miR-892c-5p	hsa-miR-1827
	hsa-miR-6793-3p	hsa-miR-1908-3p
	hsa-miR-6729-3p	hsa-miR-1909-5p
	hsa-miR-3529-3p	hsa-miR-1910-5p
	hsa-miR-300	hsa-miR-1910-3p
	hsa-miR-381-3p	hsa-miR-1911-5p
	hsa-miR-4666a-3p	hsa-miR-1914-5p
	hsa-let-7b-3p	hsa-miR-2114-5p
	hsa-let-7a-3p	hsa-miR-2114-3p
	hsa-let-7f-1-3p	hsa-miR-2116-5p
	hsa-miR-98-3p	hsa-miR-2117
	hsa-miR-1284	hsa-miR-2276-3p
	hsa-miR-6883-3p	hsa-miR-711
	hsa-miR-454-5p	hsa-miR-3122
	hsa-miR-8084	hsa-miR-3124-3p
	hsa-miR-6505-5p	hsa-miR-3129-3p
	hsa-miR-4427	hsa-miR-3130-5p
	hsa-miR-6842-3p	hsa-miR-378b
	hsa-miR-647	hsa-miR-3136-5p
	hsa-miR-4715-5p	hsa-miR-544b
	hsa-miR-216a-3p	hsa-miR-3141
	hsa-miR-27b-3p	hsa-miR-3142
	hsa-miR-27a-3p	hsa-miR-3144-3p
	hsa-miR-3681-3p	hsa-miR-3149
	hsa-miR-128-3p	hsa-miR-3150a-5p
	hsa-miR-1229-3p	hsa-miR-3074-3p
	hsa-miR-15a-3p	hsa-miR-3154
	hsa-miR-4717-5p	hsa-miR-3155a
	hsa-miR-4422	hsa-miR-3157-3p
	hsa-miR-548e-5p	hsa-miR-3158-5p
	hsa-miR-340-5p	hsa-miR-3162-5p
	hsa-miR-33a-3p	hsa-miR-3162-3p
	hsa-miR-548c-3p	hsa-miR-1260b
	hsa-miR-3117-5p	hsa-miR-3169
	hsa-miR-514a-3p	hsa-miR-3170
	hsa-miR-514b-3p	hsa-miR-3180-3p
	hsa-miR-1227-3p	hsa-miR-548w
	hsa-miR-6507-3p	hsa-miR-3184-5p
	hsa-miR-142-5p	hsa-miR-3184-3p
	hsa-miR-5590-3p	hsa-miR-3065-3p
	hsa-miR-6875-3p	hsa-miR-3186-3p
	hsa-miR-4659b-3p	hsa-miR-3187-5p
	hsa-miR-4659a-3p	hsa-miR-320e
	hsa-miR-1250-3p	hsa-miR-3190-5p
	hsa-miR-4736	hsa-miR-3190-3p
	hsa-miR-4763-3p	hsa-miR-3198
	hsa-miR-1207-5p	hsa-miR-4295
	hsa-miR-890	hsa-miR-4297
	hsa-miR-4693-3p	hsa-miR-378c
	hsa-miR-4712-3p	hsa-miR-4294
	hsa-miR-4662b	hsa-miR-4299
	hsa-miR-4426	hsa-miR-4298
	hsa-miR-4647	hsa-miR-4306
	hsa-miR-3185	hsa-miR-4312
	hsa-miR-4705	hsa-miR-4313
	hsa-miR-3691-3p	hsa-miR-4316
	hsa-miR-3977	hsa-miR-4318
	hsa-miR-891b	hsa-miR-4319
	hsa-miR-605-3p	hsa-miR-4321
	hsa-miR-3154	hsa-miR-4259
	hsa-miR-4309	hsa-miR-4260
	hsa-miR-3198	hsa-miR-4251
	hsa-miR-432-5p	hsa-miR-4326
	hsa-miR-653-5p	hsa-miR-4265
	hsa-miR-494-3p	hsa-miR-2355-3p
	hsa-miR-651-3p	hsa-miR-4263
	hsa-miR-4528	hsa-miR-4270
	hsa-miR-586	hsa-miR-4271
	hsa-miR-6715a-3p	hsa-miR-4287
	hsa-miR-520d-5p	hsa-miR-4292
	hsa-miR-524-5p	hsa-miR-4290
	hsa-miR-556-3p	hsa-miR-500b-5p
	hsa-miR-132-3p	hsa-miR-500b-3p
	hsa-miR-212-3p	hsa-miR-3605-5p
	hsa-miR-146a-5p	hsa-miR-3606-3p
	hsa-miR-146b-5p	hsa-miR-3618
	hsa-miR-7153-5p	hsa-miR-3620-3p
	hsa-miR-589-5p	hsa-miR-3654
	hsa-miR-1252-3p	hsa-miR-3664-3p
	hsa-miR-539-5p	hsa-miR-3666
	hsa-miR-144-3p	hsa-miR-3675-5p
	hsa-miR-3123	hsa-miR-3675-3p
	hsa-miR-3925-5p	hsa-miR-3678-3p
	hsa-miR-3976	hsa-miR-3679-5p
	hsa-miR-153-5p	hsa-miR-3679-3p
	hsa-miR-4694-3p	hsa-miR-3682-3p
	hsa-miR-224-3p	hsa-miR-3689a-5p
	hsa-miR-522-3p	hsa-miR-3691-3p
	hsa-miR-409-3p	hsa-miR-3713
	hsa-miR-545-5p	hsa-miR-3180
	hsa-miR-802	hsa-miR-3689b-5p
	hsa-miR-329-5p	hsa-miR-3917
	hsa-miR-198	hsa-miR-3918
	hsa-miR-4743-3p	hsa-miR-3927-3p
	hsa-miR-6888-3p	hsa-miR-3936
	hsa-miR-4652-3p	hsa-miR-3938
	hsa-miR-4775	hsa-miR-3945
	hsa-miR-374b-5p	hsa-miR-550b-2-5p
	hsa-miR-374a-5p	hsa-miR-378e
	hsa-miR-32-3p	hsa-miR-4418
	hsa-miR-1279	hsa-miR-378f
	hsa-miR-575	hsa-miR-4422
	hsa-miR-4676-5p	hsa-miR-4423-5p
	hsa-miR-6858-3p	hsa-miR-378g
	hsa-miR-3651	hsa-miR-4429
	hsa-miR-95-5p	hsa-miR-4430
	hsa-miR-659-3p	hsa-miR-4433a-5p
	hsa-miR-218-1-3p	hsa-miR-4433a-3p
	hsa-miR-532-5p	hsa-miR-4435
	hsa-miR-105-5p	hsa-miR-4437
	hsa-miR-7853-5p	hsa-miR-4440
	hsa-miR-4272	hsa-miR-4441
	hsa-miR-4803	hsa-miR-4442
	hsa-miR-450b-5p	hsa-miR-4443
	hsa-miR-216b-5p	hsa-miR-4447
	hsa-miR-6771-3p	hsa-miR-4450
	hsa-miR-548as-3p	hsa-miR-4463
	hsa-miR-1468-3p	hsa-miR-4472
	hsa-miR-548p	hsa-miR-4475
	hsa-miR-655-3p	hsa-miR-3689e
	hsa-miR-374c-5p	hsa-miR-3155b
	hsa-miR-369-3p	hsa-miR-4486
	hsa-miR-4796-5p	hsa-miR-548al
	hsa-miR-126-5p	hsa-miR-4490
	hsa-miR-4795-3p	hsa-miR-4491
	hsa-miR-6747-3p	hsa-miR-4493
	hsa-miR-4763-5p	hsa-miR-4494
	hsa-miR-6894-3p	hsa-miR-4496
	hsa-miR-6514-3p	hsa-miR-4498
	hsa-miR-4423-5p	hsa-miR-4500
	hsa-miR-495-5p	hsa-miR-2392
	hsa-miR-19b-3p	hsa-miR-4507
	hsa-miR-19a-3p	hsa-miR-4511
	hsa-miR-4671-3p	hsa-miR-4514
	hsa-miR-4473	hsa-miR-4516
	hsa-miR-323a-3p	hsa-miR-4518
	hsa-miR-493-5p	hsa-miR-4520-5p
	hsa-miR-4666b	hsa-miR-4520-3p
	hsa-miR-5011-3p	hsa-miR-4524a-5p
	hsa-miR-2054	hsa-miR-4530
	hsa-miR-7153-3p	hsa-miR-4534
	hsa-miR-6835-3p	hsa-miR-4535
	hsa-miR-9-3p	hsa-miR-1587
	hsa-miR-8068	hsa-miR-4633-5p
	hsa-miR-6868-5p	hsa-miR-4633-3p
	hsa-miR-6715b-3p	hsa-miR-4636
	hsa-miR-3159	hsa-miR-4640-3p
	hsa-miR-633	hsa-miR-4645-3p
	hsa-miR-4682	hsa-miR-4646-5p
	hsa-miR-1231	hsa-miR-4646-3p
	hsa-miR-632	hsa-miR-4651
	hsa-miR-4288	hsa-miR-4652-5p
	hsa-miR-4670-3p	hsa-miR-4652-3p
	hsa-miR-27a-5p	hsa-miR-4653-5p
	hsa-miR-4489	hsa-miR-4654
	hsa-miR-4283	hsa-miR-4655-3p
	hsa-miR-185-3p	hsa-miR-4656
	hsa-miR-548ar-3p	hsa-miR-4657
	hsa-miR-548a-3p	hsa-miR-4658
	hsa-miR-548f-3p	hsa-miR-4661-5p
	hsa-miR-548az-3p	hsa-miR-4667-5p
	hsa-miR-548e-3p	hsa-miR-4669
	hsa-miR-1323	hsa-miR-4671-3p
	hsa-miR-548o-3p	hsa-miR-4673
	hsa-miR-495-3p	hsa-miR-4676-5p
	hsa-miR-5688	hsa-miR-4680-5p
	hsa-miR-6074	hsa-miR-4684-3p
	hsa-miR-583	hsa-miR-4685-3p
	hsa-miR-5009-3p	hsa-miR-1343-5p
	hsa-miR-500b-5p	hsa-miR-4689
	hsa-miR-500a-5p	hsa-miR-4690-5p
	hsa-miR-4720-3p	hsa-miR-4699-5p
	hsa-miR-4804-3p	hsa-miR-4701-5p
	hsa-miR-6893-3p	hsa-miR-4701-3p
	hsa-miR-370-3p	hsa-miR-4706
	hsa-miR-4666a-5p	hsa-miR-4709-3p
	hsa-miR-200a-3p	hsa-miR-4712-3p
	hsa-miR-141-3p	hsa-miR-4713-3p
	hsa-miR-6737-3p	hsa-miR-4715-3p
	hsa-miR-7157-3p	hsa-miR-4716-5p
	hsa-miR-5008-3p	hsa-miR-3529-5p
	hsa-miR-4524a-3p	hsa-miR-4720-5p
	hsa-miR-4501	hsa-miR-4720-3p
	hsa-miR-7159-3p	hsa-miR-4722-5p
	hsa-miR-302c-3p.2	hsa-miR-4724-3p
	hsa-miR-520f-3p	hsa-miR-4725-5p
	hsa-miR-5586-3p	hsa-miR-4728-5p
	hsa-miR-628-3p	hsa-miR-4728-3p
	hsa-miR-325	hsa-miR-4730
	hsa-miR-6800-5p	hsa-miR-4731-5p
	hsa-miR-5571-3p	hsa-miR-4731-3p
	hsa-miR-512-3p	hsa-miR-4732-3p
	hsa-miR-6080	hsa-miR-4733-3p
	hsa-miR-6515-3p	hsa-miR-3064-3p
	hsa-miR-1236-3p	hsa-miR-4739
	hsa-miR-3156-5p	hsa-miR-4740-5p
	hsa-miR-6885-3p	hsa-miR-4747-5p
	hsa-miR-129-5p	hsa-miR-4750-5p
	hsa-miR-6816-3p	hsa-miR-4750-3p
	hsa-miR-330-3p	hsa-miR-4751
	hsa-miR-654-3p	hsa-miR-4752
	hsa-miR-6516-3p	hsa-miR-4753-3p
	hsa-miR-1206	hsa-miR-371b-5p
	hsa-miR-2052	hsa-miR-371b-3p
	hsa-miR-19a-5p	hsa-miR-4754
	hsa-miR-19b-2-5p	hsa-miR-4755-3p
	hsa-miR-19b-1-5p	hsa-miR-4759
	hsa-miR-4662a-3p	hsa-miR-4761-5p
	hsa-miR-6782-3p	hsa-miR-4761-3p
	hsa-miR-2115-3p	hsa-miR-4763-5p
	hsa-miR-34a-3p	hsa-miR-4765
	hsa-miR-6806-5p	hsa-miR-4770
	hsa-miR-28-3p	hsa-miR-4773
	hsa-miR-526b-5p	hsa-miR-4774-5p
	hsa-miR-1248	hsa-miR-4774-3p
	hsa-miR-6868-3p	hsa-miR-4436b-3p
	hsa-miR-1237-3p	hsa-miR-4781-3p
	hsa-miR-6891-3p	hsa-miR-4782-5p
	hsa-miR-6072	hsa-miR-4782-3p
	hsa-miR-670-3p	hsa-miR-4785
	hsa-miR-3667-3p	hsa-miR-4786-3p
	hsa-miR-6734-3p	hsa-miR-4789-3p
	hsa-miR-7151-5p	hsa-miR-4796-3p
	hsa-miR-4699-5p	hsa-miR-4797-5p
	hsa-miR-5088-3p	hsa-miR-4800-5p
	hsa-miR-6886-3p	hsa-miR-4800-3p
	hsa-miR-129-1-3p	hsa-miR-4804-5p
	hsa-miR-129-2-3p	hsa-miR-4804-3p
	hsa-miR-4267	hsa-miR-5001-3p
	hsa-miR-6720-5p	hsa-miR-5002-5p
	hsa-miR-6512-3p	hsa-miR-5004-5p
	hsa-miR-4716-5p	hsa-miR-5006-5p
	hsa-miR-7161-3p	hsa-miR-5006-3p
	hsa-miR-7158-3p	hsa-miR-5008-3p
	hsa-miR-203b-3p	hsa-miR-5087
	hsa-miR-4740-3p	hsa-miR-5088-5p
	hsa-miR-103a-2-5p	hsa-miR-5090
	hsa-miR-6795-3p	hsa-miR-5186
	hsa-miR-6826-3p	hsa-miR-5187-3p
	hsa-miR-6887-3p	hsa-miR-5189-3p
	hsa-miR-2355-5p	hsa-miR-5190
	hsa-miR-302d-5p	hsa-miR-5192
	hsa-miR-302b-5p	hsa-miR-5193
	hsa-miR-4753-3p	hsa-miR-5196-5p
	hsa-miR-130b-5p	hsa-miR-5196-3p
	hsa-miR-6873-3p	hsa-miR-4524b-5p
	hsa-miR-6817-3p	hsa-miR-4524b-3p
	hsa-miR-7110-3p	hsa-miR-548aq-5p
	hsa-miR-4768-5p	hsa-miR-548as-3p
	hsa-miR-6833-3p	hsa-miR-664b-5p
	hsa-miR-6809-3p	hsa-miR-5580-3p
	hsa-miR-216b-3p	hsa-miR-5582-3p
	hsa-miR-377-3p	hsa-miR-5584-3p
	hsa-miR-5096	hsa-miR-5585-3p
	hsa-miR-335-3p	hsa-miR-5586-3p
	hsa-miR-3119	hsa-miR-5587-3p
	hsa-miR-188-3p	hsa-miR-548au-3p
	hsa-miR-3156-3p	hsa-miR-5588-5p
	hsa-miR-1260a	hsa-miR-5591-3p
	hsa-miR-1260b	hsa-miR-5682
	hsa-miR-1914-5p	hsa-miR-5692c
	hsa-miR-649	hsa-miR-5690
	hsa-miR-4299	hsa-miR-5691
	hsa-miR-4456	hsa-miR-5693
	hsa-miR-7978	hsa-miR-5698
	hsa-miR-548q	hsa-miR-5699-5p
	hsa-miR-3192-3p	hsa-miR-5699-3p
	hsa-miR-3151-3p	hsa-miR-5692b
	hsa-miR-452-3p	hsa-miR-5706
	hsa-miR-3913-3p	hsa-miR-5708
	hsa-miR-6506-5p	hsa-miR-5787
	hsa-miR-619-5p	hsa-miR-6070
	hsa-miR-4314	hsa-miR-6086
	hsa-miR-204-3p	hsa-miR-6127
	hsa-miR-4646-5p	hsa-miR-6128
	hsa-miR-3192-5p	hsa-miR-6129
	hsa-miR-2682-5p	hsa-miR-6131
	hsa-miR-34b-5p	hsa-miR-6132
	hsa-miR-449c-5p	hsa-miR-6499-3p
	hsa-miR-1827	hsa-miR-6500-3p
	hsa-miR-650	hsa-miR-6503-5p
	hsa-miR-3612	hsa-miR-6504-5p
	hsa-miR-4443	hsa-miR-6504-3p
	hsa-miR-7847-3p	hsa-miR-6507-5p
	hsa-miR-6880-5p	hsa-miR-6508-3p
	hsa-miR-8071	hsa-miR-6510-3p
	hsa-miR-3165	hsa-miR-6511a-5p
	hsa-miR-6757-5p	hsa-miR-6511a-3p
	hsa-miR-3162-5p	hsa-miR-6512-3p
	hsa-miR-5197-3p	hsa-miR-6513-3p
	hsa-miR-4745-5p	hsa-miR-6514-5p
	hsa-miR-4481	hsa-miR-6715b-5p
	hsa-miR-1261	hsa-miR-6716-3p
	hsa-miR-5004-3p	hsa-miR-6511b-5p
	hsa-miR-6740-5p	hsa-miR-892c-5p
	hsa-miR-4676-3p	hsa-miR-6728-5p
	hsa-miR-452-5p	hsa-miR-6729-3p
	hsa-miR-892c-3p	hsa-miR-6730-5p
	hsa-miR-3064-3p	hsa-miR-6731-5p
	hsa-miR-885-5p	hsa-miR-6734-3p
	hsa-miR-5581-3p	hsa-miR-6735-5p
	hsa-miR-4668-5p	hsa-miR-6737-5p
	hsa-miR-3153	hsa-miR-6737-3p
	hsa-miR-6733-5p	hsa-miR-6740-5p
	hsa-miR-6739-5p	hsa-miR-6742-3p
	hsa-miR-4697-3p	hsa-miR-6744-5p
	hsa-miR-548ai	hsa-miR-6746-3p
	hsa-miR-570-5p	hsa-miR-6747-5p
	hsa-miR-548ag	hsa-miR-6747-3p
	hsa-miR-548ba	hsa-miR-6748-5p
	hsa-miR-548m	hsa-miR-6748-3p
	hsa-miR-6730-5p	hsa-miR-6752-5p
	hsa-miR-8080	hsa-miR-6757-3p
	hsa-miR-6814-5p	hsa-miR-6758-5p
	hsa-miR-100-3p	hsa-miR-6759-3p
	hsa-miR-4503	hsa-miR-6760-3p
	hsa-miR-759	hsa-miR-6765-5p
	hsa-miR-1253	hsa-miR-6766-5p
	hsa-miR-6770-5p	hsa-miR-6766-3p
	hsa-miR-1245b-3p	hsa-miR-6768-5p
	hsa-miR-5683	hsa-miR-6769a-5p
	hsa-miR-3935	hsa-miR-6770-5p
	hsa-miR-3927-3p	hsa-miR-6772-5p
	hsa-miR-6831-5p	hsa-miR-6774-5p
	hsa-miR-196b-5p	hsa-miR-6775-3p
	hsa-miR-196a-5p	hsa-miR-6778-5p
	hsa-miR-331-5p	hsa-miR-6779-3p
	hsa-miR-6509-5p	hsa-miR-6781-5p
	hsa-miR-935	hsa-miR-6781-3p
	hsa-miR-5003-5p	hsa-miR-6782-5p
	hsa-miR-4999-3p	hsa-miR-6782-3p
	hsa-miR-10a-3p	hsa-miR-6790-5p
	hsa-miR-4417	hsa-miR-6792-5p
	hsa-miR-6853-5p	hsa-miR-6793-5p
	hsa-miR-551b-5p	hsa-miR-6793-3p
	hsa-miR-3125	hsa-miR-6795-3p
	hsa-miR-3916	hsa-miR-6796-3p
	hsa-miR-6859-5p	hsa-miR-6797-5p
	hsa-miR-31-5p	hsa-miR-6797-3p
	hsa-miR-624-3p	hsa-miR-6798-5p
	hsa-miR-302a-5p	hsa-miR-6798-3p
	hsa-miR-6832-5p	hsa-miR-6800-3p
	hsa-miR-936	hsa-miR-6801-5p
	hsa-miR-222-5p	hsa-miR-6803-3p
	hsa-miR-3129-5p	hsa-miR-6804-3p
	hsa-miR-199a-3p	hsa-miR-6805-5p
	hsa-miR-199b-3p	hsa-miR-6806-5p
	hsa-miR-548x-5p	hsa-miR-6806-3p
	hsa-miR-548g-5p	hsa-miR-6807-5p
	hsa-miR-548f-5p	hsa-miR-6808-5p
	hsa-miR-548aj-5p	hsa-miR-6808-3p
		hsa-miR-6809-5p
		hsa-miR-6810-5p
		hsa-miR-6811-3p
		hsa-miR-6812-3p
		hsa-miR-6813-3p
		hsa-miR-6814-5p
		hsa-miR-6814-3p
		hsa-miR-6817-5p
		hsa-miR-6820-5p
		hsa-miR-6820-3p
		hsa-miR-6821-3p
		hsa-miR-6823-3p
		hsa-miR-6824-5p
		hsa-miR-6825-5p
		hsa-miR-6828-5p
		hsa-miR-6829-5p
		hsa-miR-6829-3p
		hsa-miR-6830-5p
		hsa-miR-6832-5p
		hsa-miR-6834-3p
		hsa-miR-6835-3p
		hsa-miR-6780b-3p
		hsa-miR-6836-5p
		hsa-miR-6836-3p
		hsa-miR-6838-3p
		hsa-miR-6839-5p
		hsa-miR-6841-3p
		hsa-miR-6845-3p
		hsa-miR-6846-3p
		hsa-miR-6847-5p
		hsa-miR-6849-5p
		hsa-miR-6851-3p
		hsa-miR-6852-5p
		hsa-miR-6854-5p
		hsa-miR-6856-5p
		hsa-miR-6856-3p
		hsa-miR-6858-5p
		hsa-miR-6858-3p
		hsa-miR-6859-5p
		hsa-miR-6769b-5p
		hsa-miR-6769b-3p
		hsa-miR-6860
		hsa-miR-6861-3p
		hsa-miR-6864-3p
		hsa-miR-6866-3p
		hsa-miR-6867-5p
		hsa-miR-6867-3p
		hsa-miR-6868-5p
		hsa-miR-6873-3p
		hsa-miR-6874-5p
		hsa-miR-6875-5p
		hsa-miR-6879-5p
		hsa-miR-6879-3p
		hsa-miR-6880-3p
		hsa-miR-6881-5p
		hsa-miR-6881-3p
		hsa-miR-6882-5p
		hsa-miR-6882-3p
		hsa-miR-6883-5p
		hsa-miR-6883-3p
		hsa-miR-6884-3p
		hsa-miR-6886-3p
		hsa-miR-6887-5p
		hsa-miR-6889-5p
		hsa-miR-6890-3p
		hsa-miR-6891-3p
		hsa-miR-6892-3p
		hsa-miR-7106-3p
		hsa-miR-7108-3p
		hsa-miR-7113-5p
		hsa-miR-7113-3p
		hsa-miR-7114-3p
		hsa-miR-7150
		hsa-miR-7152-5p
		hsa-miR-7152-3p
		hsa-miR-7154-3p
		hsa-miR-7156-3p
		hsa-miR-7157-3p
		hsa-miR-7160-3p
		hsa-miR-7162-5p
		hsa-miR-7705
		hsa-miR-7706
		hsa-miR-7843-5p
		hsa-miR-7845-5p
		hsa-miR-7848-3p
		hsa-miR-7850-5p
		hsa-miR-7851-3p
		hsa-miR-7854-3p
		hsa-miR-7856-5p
		hsa-miR-8052
		hsa-miR-8063
		hsa-miR-8071
		hsa-miR-8081
		hsa-miR-8083
		hsa-miR-8085
		hsa-miR-8088
		hsa-miR-8089
		hsa-miR-9718
		hsa-miR-9898
		hsa-miR-9902
		hsa-miR-9985
		hsa-miR-1843
		hsa-miR-10392-5p
		hsa-miR-10396a-3p
		hsa-miR-10401-5p
		hsa-miR-10401-3p
		hsa-miR-10523-5p
		hsa-miR-11181-3p
		hsa-miR-6529-3p
		hsa-miR-12113
		hsa-miR-12114
		hsa-miR-12116
		hsa-miR-12125
		hsa-miR-12131
		hsa-miR-19b-3p
		hsa-miR-32-5p
		hsa-miR-100-5p
		hsa-miR-203a-3p
		hsa-miR-204-3p
		hsa-miR-122-3p
		hsa-miR-299-5p
		hsa-miR-338-5p
		hsa-miR-589-3p
		hsa-miR-591
		hsa-miR-600
		hsa-miR-610
		hsa-miR-612
		hsa-miR-33b-5p
		hsa-miR-648
		hsa-miR-668-3p
		hsa-miR-670-5p
		hsa-miR-297
		hsa-miR-1257
		hsa-miR-548n
		hsa-miR-1276
		hsa-miR-3115
		hsa-miR-3116
		hsa-miR-3178
		hsa-miR-3194-3p
		hsa-miR-3199
		hsa-miR-4314
		hsa-miR-4266
		hsa-miR-4330
		hsa-miR-3609
		hsa-miR-3680-3p
		hsa-miR-3683
		hsa-miR-3684
		hsa-miR-3908
		hsa-miR-374c-3p
		hsa-miR-4451
		hsa-miR-4476
		hsa-miR-4510
		hsa-miR-4528
		hsa-miR-548an
		hsa-miR-4539
		hsa-miR-4681
		hsa-miR-203b-3p
		hsa-miR-122b-5p
		hsa-miR-4753-5p
		hsa-miR-5093
		hsa-miR-5195-5p
		hsa-miR-5584-5p
		hsa-miR-5702
		hsa-miR-6503-3p
		hsa-miR-6845-5p
		hsa-miR-6857-5p
		hsa-miR-6862-5p
		hsa-miR-7156-5p
		hsa-miR-7158-3p
		hsa-miR-7162-3p
		hsa-miR-7843-3p
		hsa-miR-4433b-3p
		hsa-miR-7973
		hsa-miR-7978
