# Supplementary material for: DEP domain containing 1: a potential oncogenic driver
Source: Biol Res. 2025 Oct 8;58:64. doi: 10.1186/s40659-025-00643-0 (PMC12505635; doi:10.1186/s40659-025-00643-0)
Supplement: Supplementary file 6 — Supplementary Material 6 [file 40659_2025_643_MOESM6_ESM.xlsx]

## Sheet: Additional file 6
ChemicalName	ChemicalID	CasRN	GeneSymbol	GeneID	GeneForms	Organism	OrganismID	Interaction	InteractionActions	PubMedIDs
1-Methyl-3-isobutylxanthine	D015056	28822-58-4	DEPDC1	55635	mRNA	Homo sapiens	9606	[INS protein co-treated with Dexamethasone co-treated with 1-Methyl-3-isobutylxanthine co-treated with Indomethacin co-treated with bisphenol A] results in decreased expression of DEPDC1 mRNA	decreases^expression	28628672
4-(4-((5-(4,5-dimethyl-2-nitrophenyl)-2-furanyl)methylene)-4,5-dihydro-3-methyl-5-oxo-1H-pyrazol-1-yl)benzoic acid	C584509		DEPDC1	55635	mRNA	Homo sapiens	9606	4-(4-((5-(4,5-dimethyl-2-nitrophenyl)-2-furanyl)methylene)-4,5-dihydro-3-methyl-5-oxo-1H-pyrazol-1-yl)benzoic acid results in decreased expression of DEPDC1 mRNA	decreases^expression	23698071
4-(5-benzo(1,3)dioxol-5-yl-4-pyridin-2-yl-1H-imidazol-2-yl)benzamide	C459179		DEPDC1	55635	mRNA	Homo sapiens	9606	[NOG protein co-treated with trichostatin A co-treated with dorsomorphin co-treated with 4-(5-benzo(1,3)dioxol-5-yl-4-pyridin-2-yl-1H-imidazol-2-yl)benzamide] results in decreased expression of DEPDC1 mRNA	decreases^expression	27188386
7,8-Dihydro-7,8-dihydroxybenzo(a)pyrene 9,10-oxide	D015123	55097-80-8	DEPDC1	55635	mRNA	Homo sapiens	9606	7,8-Dihydro-7,8-dihydroxybenzo(a)pyrene 9,10-oxide results in decreased expression of DEPDC1 mRNA	decreases^expression	20018196|20382639
Acetaminophen	D000082	103-90-2	DEPDC1	55635	mRNA	Homo sapiens	9606	Acetaminophen results in decreased expression of DEPDC1 mRNA	decreases^expression	29067470
Acrylamide	D020106	1979-06-01	DEPDC1	55635	mRNA	Homo sapiens	9606	Acrylamide results in decreased expression of DEPDC1 mRNA	decreases^expression	32763439
Aflatoxin B1	D016604	1162-65-8	DEPDC1	55635	mRNA	Homo sapiens	9606	Aflatoxin B1 results in decreased expression of DEPDC1 mRNA	decreases^expression	31555880|32234424
Aflatoxin M1	D016607	6795-23-9	DEPDC1	55635	mRNA	Homo sapiens	9606	Aflatoxin M1 results in decreased expression of DEPDC1 mRNA	decreases^expression	30928695
Arsenic Trioxide	D000077237	1327-53-3	DEPDC1	55635	mRNA	Homo sapiens	9606	Arsenic Trioxide results in decreased expression of DEPDC1 mRNA	decreases^expression	26705709
Azathioprine	D001379	446-86-6	DEPDC1	55635	mRNA	Homo sapiens	9606	Azathioprine results in decreased expression of DEPDC1 mRNA	decreases^expression	22623647
azoxystrobin	C087670	131860-33-8	DEPDC1	55635	mRNA	Homo sapiens	9606	azoxystrobin results in decreased expression of DEPDC1 mRNA	decreases^expression	33512557
Benzene	D001554	71-43-2	DEPDC1	55635	mRNA	Homo sapiens	9606	Benzene results in decreased expression of DEPDC1 mRNA	decreases^expression	21843810
Benzo(a)pyrene	D001564	50-32-8	DEPDC1	55635	mRNA	Homo sapiens	9606	Benzo(a)pyrene results in decreased expression of DEPDC1 mRNA	decreases^expression	21632981|31555880
bisphenol A	C006780	1980-05-07	DEPDC1	55635	mRNA	Homo sapiens	9606	bisphenol A results in decreased expression of DEPDC1 mRNA	decreases^expression	29275510
bisphenol A	C006780	1980-05-07	DEPDC1	55635	mRNA	Homo sapiens	9606	[INS protein co-treated with Dexamethasone co-treated with 1-Methyl-3-isobutylxanthine co-treated with Indomethacin co-treated with bisphenol A] results in decreased expression of DEPDC1 mRNA	decreases^expression	28628672
butyraldehyde	C018475	123-72-8	DEPDC1	55635	mRNA	Homo sapiens	9606	butyraldehyde results in decreased expression of DEPDC1 mRNA	decreases^expression	26079696
Calcitriol	D002117	32222-06-3	DEPDC1	55635	mRNA	Homo sapiens	9606	Calcitriol results in decreased expression of DEPDC1 mRNA	decreases^expression	21592394
Calcitriol	D002117	32222-06-3	DEPDC1	55635	mRNA	Homo sapiens	9606	[Testosterone co-treated with Calcitriol] results in decreased expression of DEPDC1 mRNA	decreases^expression	21592394
Cisplatin	D002945	15663-27-1	DEPDC1	55635	mRNA	Homo sapiens	9606	Cisplatin results in decreased expression of DEPDC1 mRNA	decreases^expression	27594783
cobaltous chloride	C018021	7646-79-9	DEPDC1	55635	mRNA	Homo sapiens	9606	cobaltous chloride results in decreased expression of DEPDC1 mRNA	decreases^expression	19376846
Copper	D003300	7440-50-8	DEPDC1	55635	mRNA	Homo sapiens	9606	[NSC 689534 binds to Copper] which results in decreased expression of DEPDC1 mRNA	decreases^expression	20971185
Copper Sulfate	D019327	7758-98-7	DEPDC1	55635	mRNA	Homo sapiens	9606	Copper Sulfate results in decreased expression of DEPDC1 mRNA	decreases^expression	19549813
Cyclosporine	D016572	59865-13-3	DEPDC1	55635	mRNA	Homo sapiens	9606	Cyclosporine results in decreased expression of DEPDC1 mRNA	decreases^expression	20106945|21632981|25562108
Dasatinib	D000069439		DEPDC1	55635	mRNA	Homo sapiens	9606	Dasatinib results in decreased expression of DEPDC1 mRNA	decreases^expression	20579391
Dexamethasone	D003907	1950-02-02	DEPDC1	55635	mRNA	Homo sapiens	9606	[INS protein co-treated with Dexamethasone co-treated with 1-Methyl-3-isobutylxanthine co-treated with Indomethacin co-treated with bisphenol A] results in decreased expression of DEPDC1 mRNA	decreases^expression	28628672
diallyl trisulfide	C042577	2050-87-5	DEPDC1	55635	mRNA	Homo sapiens	9606	diallyl trisulfide results in decreased expression of DEPDC1 mRNA	decreases^expression	34995734
dicrotophos	C000944	3735-78-2	DEPDC1	55635	mRNA	Homo sapiens	9606	dicrotophos results in decreased expression of DEPDC1 mRNA	decreases^expression	28302478
dorsomorphin	C516138		DEPDC1	55635	mRNA	Homo sapiens	9606	[NOG protein co-treated with trichostatin A co-treated with dorsomorphin co-treated with 4-(5-benzo(1,3)dioxol-5-yl-4-pyridin-2-yl-1H-imidazol-2-yl)benzamide] results in decreased expression of DEPDC1 mRNA	decreases^expression	27188386
Doxorubicin	D004317	23214-92-8	DEPDC1	55635	mRNA	Homo sapiens	9606	Doxorubicin results in decreased expression of DEPDC1 mRNA	decreases^expression	29803840|30031762
Folic Acid	D005492	59-30-3	DEPDC1	55635	mRNA	Homo sapiens	9606	[Folic Acid deficiency co-treated with Methotrexate] results in decreased expression of DEPDC1 mRNA	decreases^expression	24657277
Formaldehyde	D005557	50-00-0	DEPDC1	55635	mRNA	Homo sapiens	9606	Formaldehyde results in decreased expression of DEPDC1 mRNA	decreases^expression	23649840
incobotulinumtoxinA	C545476		DEPDC1	55635	mRNA	Homo sapiens	9606	incobotulinumtoxinA results in decreased expression of DEPDC1 mRNA	decreases^expression	29522793
Indomethacin	D007213	53-86-1	DEPDC1	55635	mRNA	Homo sapiens	9606	[INS protein co-treated with Dexamethasone co-treated with 1-Methyl-3-isobutylxanthine co-treated with Indomethacin co-treated with bisphenol A] results in decreased expression of DEPDC1 mRNA	decreases^expression	28628672
(+)-JQ1 compound	C561695		DEPDC1	55635	mRNA	Homo sapiens	9606	(+)-JQ1 compound results in decreased expression of DEPDC1 mRNA	decreases^expression	24796395
Leflunomide	D000077339	75706-12-6	DEPDC1	55635	mRNA	Homo sapiens	9606	Leflunomide results in decreased expression of DEPDC1 mRNA	decreases^expression	28988120
Lipopolysaccharides	D008070		DEPDC1	55635	mRNA	Homo sapiens	9606	[S-(1,2-dichlorovinyl)cysteine co-treated with Lipopolysaccharides] results in decreased expression of DEPDC1 mRNA	decreases^expression	35811015
Lucanthone	D008154	479-50-5	DEPDC1	55635	mRNA	Homo sapiens	9606	Lucanthone results in decreased expression of DEPDC1 mRNA	decreases^expression	21148553
Methapyrilene	D008701	91-80-5	DEPDC1	55635	mRNA	Homo sapiens	9606	Methapyrilene results in decreased expression of DEPDC1 mRNA	decreases^expression	31555880
Methotrexate	D008727	1959-05-02	DEPDC1	55635	mRNA	Homo sapiens	9606	[Folic Acid deficiency co-treated with Methotrexate] results in decreased expression of DEPDC1 mRNA	decreases^expression	24657277
Methotrexate	D008727	1959-05-02	DEPDC1	55635	mRNA	Homo sapiens	9606	Methotrexate results in decreased expression of DEPDC1 mRNA	decreases^expression	24657277
Methyl Methanesulfonate	D008741	66-27-3	DEPDC1	55635	mRNA	Homo sapiens	9606	Methyl Methanesulfonate results in decreased expression of DEPDC1 mRNA	decreases^expression	23649840
Mustard Gas	D009151	505-60-2	DEPDC1	55635	mRNA	Homo sapiens	9606	Mustard Gas results in decreased expression of DEPDC1 mRNA	decreases^expression	25102026
N-Nitrosopyrrolidine	D009242	930-55-2	DEPDC1	55635	mRNA	Homo sapiens	9606	N-Nitrosopyrrolidine results in decreased expression of DEPDC1 mRNA	decreases^expression	32234424
nobiletin	C008661	478-01-3	DEPDC1	55635	mRNA	Homo sapiens	9606	nobiletin results in decreased expression of DEPDC1 mRNA	decreases^expression	23321314
NSC668394	C570897		DEPDC1	55635	mRNA	Homo sapiens	9606	NSC668394 results in decreased expression of DEPDC1 mRNA	decreases^expression	27137931
NSC 689534	C558013		DEPDC1	55635	mRNA	Homo sapiens	9606	[NSC 689534 binds to Copper] which results in decreased expression of DEPDC1 mRNA	decreases^expression	20971185
pentanal	C046012	110-62-3	DEPDC1	55635	mRNA	Homo sapiens	9606	pentanal results in decreased expression of DEPDC1 mRNA	decreases^expression	26079696
perfluoro-n-nonanoic acid	C101816	375-95-1	DEPDC1	55635	mRNA	Homo sapiens	9606	perfluoro-n-nonanoic acid results in decreased expression of DEPDC1 mRNA	decreases^expression	32588087
Progesterone	D011374	57-83-0	DEPDC1	55635	mRNA	Homo sapiens	9606	Progesterone results in decreased expression of DEPDC1 mRNA	decreases^expression	21795739
propionaldehyde	C005556	123-38-6	DEPDC1	55635	mRNA	Homo sapiens	9606	propionaldehyde results in decreased expression of DEPDC1 mRNA	decreases^expression	26079696
Quercetin	D011794	117-39-5	DEPDC1	55635	mRNA	Homo sapiens	9606	Quercetin results in decreased expression of DEPDC1 mRNA	decreases^expression	21632981
Rotenone	D012402	83-79-4	DEPDC1	55635	mRNA	Homo sapiens	9606	Rotenone results in decreased expression of DEPDC1 mRNA	decreases^expression	33512557
S-(1,2-dichlorovinyl)cysteine	C039961	627-72-5	DEPDC1	55635	mRNA	Homo sapiens	9606	[S-(1,2-dichlorovinyl)cysteine co-treated with Lipopolysaccharides] results in decreased expression of DEPDC1 mRNA	decreases^expression	35811015
Silver	D012834	7440-22-4	DEPDC1	55635	mRNA	Homo sapiens	9606	Silver results in decreased expression of DEPDC1 mRNA	decreases^expression	28959546
sodium arsenite	C017947	13768-07-5	DEPDC1	55635	mRNA	Homo sapiens	9606	sodium arsenite results in decreased expression of DEPDC1 mRNA	decreases^expression	20371982
Sunitinib	D000077210		DEPDC1	55635	mRNA	Homo sapiens	9606	Sunitinib results in decreased expression of DEPDC1 mRNA	decreases^expression	31533062
Testosterone	D013739	58-22-0	DEPDC1	55635	mRNA	Homo sapiens	9606	[Testosterone co-treated with Calcitriol] results in decreased expression of DEPDC1 mRNA	decreases^expression	21592394
Testosterone	D013739	58-22-0	DEPDC1	55635	mRNA	Homo sapiens	9606	Testosterone results in decreased expression of DEPDC1 mRNA	decreases^expression	21592394
Tetrachlorodibenzodioxin	D013749	1746-01-6	DEPDC1	55635	mRNA	Homo sapiens	9606	Tetrachlorodibenzodioxin results in decreased expression of DEPDC1 mRNA	decreases^expression	20106945
Thiram	D013893	137-26-8	DEPDC1	55635	mRNA	Homo sapiens	9606	Thiram results in decreased expression of DEPDC1 mRNA	decreases^expression	38568856
Tobacco Smoke Pollution	D014028		DEPDC1	55635	mRNA	Homo sapiens	9606	Tobacco Smoke Pollution results in decreased expression of DEPDC1 mRNA	decreases^expression	33660061
Tretinoin	D014212	302-79-4	DEPDC1	55635	mRNA	Homo sapiens	9606	Tretinoin results in decreased expression of DEPDC1 mRNA	decreases^expression	33167477
trichostatin A	C012589	58880-19-6	DEPDC1	55635	mRNA	Homo sapiens	9606	[NOG protein co-treated with trichostatin A co-treated with dorsomorphin co-treated with 4-(5-benzo(1,3)dioxol-5-yl-4-pyridin-2-yl-1H-imidazol-2-yl)benzamide] results in decreased expression of DEPDC1 mRNA	decreases^expression	27188386
trichostatin A	C012589	58880-19-6	DEPDC1	55635	mRNA	Homo sapiens	9606	trichostatin A results in decreased expression of DEPDC1 mRNA	decreases^expression	26272509
Valproic Acid	D014635	99-66-1	DEPDC1	55635	mRNA	Homo sapiens	9606	Valproic Acid results in decreased expression of DEPDC1 mRNA	decreases^expression	23179753
Vanadates	D014638		DEPDC1	55635	mRNA	Homo sapiens	9606	Vanadates results in decreased expression of DEPDC1 mRNA	decreases^expression	22714537
Zoledronic Acid	D000077211		DEPDC1	55635	mRNA	Homo sapiens	9606	Zoledronic Acid results in decreased expression of DEPDC1 mRNA	decreases^expression	24714768
